# Supplementary material
Source: publisher site journal article supplement (https://www.spandidos-publications.com/2006/downloadSupplementary)
Supplement: Supplementary file 1 [file downloadSupplementary]

## Sheet: Sheet1
Table SI: Total peptides expressed in between the IgAN group and the healthy control group
Peptide	m/z	Quality	Significance	Avg. ppm	Theoretical pI	Accession	PTM	IgAN 1	IgAN 124	IgAN 13	IgAN 139	IgAN 15	IgAN 16	IgAN 171	IgAN 193	IgAN 194	IgAN 28	IgAN 32	IgAN 33	IgAN 358	IgAN 360	IgAN 4	IgAN 43	IgAN 85	con 116	con 123	con 124	con 128	con 132	con 133	con 134	con 142	con 46	con 81	con 82
DSDGASGD	723.242	0.02	60	6	3.42			0	0	0	0	0	0	0	0	0	1.18	0	0	0	0	0	0	0	0	0	0	0	0	0	0	0	0	0	0
LRPVR	640.431	0.01	3.93	0	12			0	0	0	0	0	0	0	0	0	54.7	0	0	0	0	0	0	0	0	0	0	0	0	0	0	0	0	0	0
N(+.98)APLKSN(+.98)DSETSSVAQ(+.98)SGSESK	446.001	0.01	60	10.5	4.68		Deamidation (NQ)	0	0	56.2	0	0	0	0	0	0	0	0	0	0	0	0	0	0	0	0	0	0	0	0	0	0	0	0	0
TETLNNVLSGN	581.296	0.01	5.1	0	4			66.6	0	0	0	0	0	0	0	0	0	0	0	0	0	0	0	0	0	0	0	0	0	0	0	0	0	0	0
TSQ(+.98)ECSDT	871.293	0.01	5.27	0	3.67		Deamidation (NQ)	0	0	0	0	0	0	0	0	0	0	68.7	0	0	0	0	0	0	0	0	0	0	0	0	0	0	0	0	0
TAGKQ	504.275	0.01	6.39	0	8.41			0	0	0	0	0	0	0	78.7	0	0	0	0	0	0	0	0	0	0	0	0	0	0	0	0	0	0	0	0
KVSAK	532.357	0.02	60	10.7	10			0	0	0	0	0	0	0	0	0	0	0	0	82.6	0	0	0	0	0	0	0	0	0	0	0	0	0	0	0
SSSGFSGSVGGQ	1056.46	0.01	60	9.8	5.24			0	0	0	0	0	0	0	0	0	107	0	0	0	0	0	0	0	0	0	0	0	0	0	0	0	0	0	0
KGDGCT	580.236	0.01	11.3	0	5.83			0	118	0	0	0	0	0	0	0	0	0	0	0	0	0	0	0	0	0	0	0	0	0	0	0	0	0	0
PLPPT	524.299	0.01	12.38	0	5.96	sp|Q8N3K9|CMYA5_HUMAN		0	0	0	0	0	0	0	0	0	0	0	123	0	0	0	0	0	0	0	0	0	0	0	0	0	0	0	0
CQLQPNACHNGGTCFN(+.98)TLGGHS	565.735	0.03	60	1	6.89		Deamidation (NQ)	0	0	0	0	0	0	0	0	0	149	0	0	0	0	0	0	0	0	0	0	0	0	0	0	0	0	0	0
DEKSIPLIWGAVL	720.905	0.01	17.59	0	4.37			0	0	0	0	0	0	0	0	0	0	0	0	0	0	156	0	0	0	0	0	0	0	0	0	0	0	0	0
TFRGKVKIIRNKKREGLIRARLIGA	579.571	0.01	60	0.4	12.19			0	0	0	0	0	0	0	0	0	0	0	0	0	0	156	0	0	0	0	0	0	0	0	0	0	0	0	0
DVREAEGQLQ	572.786	0.02	60	8.5	4.14			0	0	0	175	0	0	0	0	0	0	0	0	0	0	0	0	0	0	0	0	0	0	0	0	0	0	0	0
AGAAGPAGNPGADG	541.736	0.01	22.55	0.8	3.8			0	0	0	0	0	0	0	0	182	0	0	0	0	0	0	0	0	0	0	0	0	0	0	0	0	0	0	0
QFQPGVWHDHSKY	407.945	0.01	22.87	0	6.92			0	0	0	0	183	0	0	0	0	0	0	0	0	0	0	0	0	0	0	0	0	0	0	0	0	0	0	0
Q(-17.03)GGGSEP	614.234	0.01	25.26	0	4		Pyro-glu from Q	0	0	0	0	0	0	0	0	0	0	0	0	0	0	0	196	0	0	0	0	0	0	0	0	0	0	0	0
PCPGSP	557.229	0.01	27	0	5.91			0	202	0	0	0	0	0	0	0	0	0	0	0	0	0	0	0	0	0	0	0	0	0	0	0	0	0	0
E(-18.01)EEELEEEDEAS	710.27	0.01	60	9.6	3.28		Pyro-glu from E	154	0	0	0	0	0	0	0	0	0	0	0	51.9	0	0	0	0	0	0	0	0	0	0	0	0	0	0	0
TCLEAQ(+.98)GGPSSP	383.17	0.03	60	3.4	4		Deamidation (NQ)	207	0	0	0	0	0	0	0	0	0	0	0	0	0	0	0	0	0	0	0	0	0	0	0	0	0	0	0
KITHRIHWESA	459.918	0.01	33.71	0	8.76	sp|P01024|CO3_HUMAN		0	233	0	0	0	0	0	0	0	0	0	0	0	0	0	0	0	0	0	0	0	0	0	0	0	0	0	0
VNPECDDQEDCSDGSDEAH	1032.85	0.01	34.61	0	3.54			0	0	0	233	0	0	0	0	0	0	0	0	0	0	0	0	0	0	0	0	0	0	0	0	0	0	0	0
SSGGAGT	536.223	0.02	60	7.2	5.24			0	0	0	0	0	0	0	0	0	245	0	0	0	0	0	0	0	0	0	0	0	0	0	0	0	0	0	0
LLLLLLR	853.63	0.01	37.45	0	9.75			0	0	0	0	0	0	248	0	0	0	0	0	0	0	0	0	0	0	0	0	0	0	0	0	0	0	0	0
IAGVLVIALPIPIIVNN(+.98)FSE	698.434	0.01	60	4.2	4		Deamidation (NQ)	0	0	0	0	0	0	0	26.7	0	0	0	0	0	107	0	115	0	0	0	0	0	0	0	0	0	0	0	0
Q(+.98)SGPGDSAYGV	1038.43	0.01	60	19.3	3.8		Deamidation (NQ)	0	0	0	0	0	0	0	0	0	0	0	0	0	0	256	0	0	0	0	0	0	0	0	0	0	0	0	0
PGSAH	468.221	0.01	44.83	0	7.17			0	0	0	277	0	0	0	0	0	0	0	0	0	0	0	0	0	0	0	0	0	0	0	0	0	0	0	0
STLIVTHALHKVKVGKSPPVRGSLSGKVSLPCHFST	754.42	0.01	60	3.9	10.48			0	0	0	0	0	289	0	0	0	0	0	0	0	0	0	0	0	0	0	0	0	0	0	0	0	0	0	0
S(+42.01)GGCGSGCGGCGSGCGGCGSGCGGY	663.517	0.01	60	6.9	5.23		Acetylation (Protein N-term)	0	292	0	0	0	0	0	0	0	0	0	0	0	0	0	0	0	0	0	0	0	0	0	0	0	0	0	0
LAEGGGV	602.298	0.02	60	2.6	4	sp|P02671|FIBA_HUMAN		0	0	0	0	0	0	0	0	0	303	0	0	0	0	0	0	0	0	0	0	0	0	0	0	0	0	0	0
FPEAEALSPEQ(+.98)AAH	749.339	0.01	60	0	4.24		Deamidation (NQ)	0	0	0	0	0	0	0	0	0	0	0	0	0	0	324	0	0	0	0	0	0	0	0	0	0	0	0	0
QQQQGLGLQ	500.264	0.01	60	0	5.52			0	0	0	0	0	0	0	0	0	339	0	0	0	0	0	0	0	0	0	0	0	0	0	0	0	0	0	0
IKKIRN(+.98)PKGPLILRLGAAPVTQPTRRVFPR	1132.02	0.01	60	8.1	12.61		Deamidation (NQ)	0	359	0	0	0	0	0	0	0	0	0	0	0	0	0	0	0	0	0	0	0	0	0	0	0	0	0	0
VAAAAASANGAAGGL	586.312	0.01	60	16	5.49			0	0	0	0	0	0	0	0	0	0	0	0	0	360	0	0	0	0	0	0	0	0	0	0	0	0	0	0
KDKTLLRDEKKMEKL	469.523	0.02	60	5.5	9.4			0	0	0	0	0	0	0	0	0	0	0	0	0	0	367	0	0	0	0	0	0	0	0	0	0	0	0	0
ELGGHLDQQVEEFR	552.936	0.01	60	0.4	4.4			0	367	0	0	0	0	0	0	0	0	0	0	0	0	0	0	0	0	0	0	0	0	0	0	0	0	0	0
NAGDGGGV	646.269	0.01	60	0	3.8			0	0	0	370	0	0	0	0	0	0	0	0	0	0	0	0	0	0	0	0	0	0	0	0	0	0	0	0
KEGPGGK	672.368	0.01	60	0	8.59			0	0	0	0	0	0	0	0	0	372	0	0	0	0	0	0	0	0	0	0	0	0	0	0	0	0	0	0
NGAYT	525.23	0.06	60	7.8	5.52			0	380	0	0	0	0	0	0	0	0	0	0	0	0	0	0	0	0	0	0	0	0	0	0	0	0	0	0
KIGGINSLLSK	565.355	0.01	60	11.3	10			0	0	381	0	0	0	0	0	0	0	0	0	0	0	0	0	0	0	0	0	0	0	0	0	0	0	0	0
PPASSPAPAPKFSPVTPKFTPVAS	793.429	0.01	60	2.7	10.02	sp|Q15942|ZYX_HUMAN		384	0	0	0	0	0	0	0	0	0	0	0	0	0	0	0	0	0	0	0	0	0	0	0	0	0	0	0
KESNVLHPN(+.98)GECPVKSEPTEPGD	1232.54	0.02	60	5.7	4.57		Deamidation (NQ)	0	0	0	218	0	0	0	0	0	0	0	0	0	0	171	0	0	0	0	0	0	0	0	0	0	0	0	0
GTPPGG	485.234	0.01	60	0	5.52			0	0	0	0	0	0	0	391	0	0	0	0	0	0	0	0	0	0	0	0	0	0	0	0	0	0	0	0
TVDEEVDENSSGM	471.188	0.01	60	0	3.39			394	0	0	0	0	0	0	0	0	0	0	0	0	0	0	0	0	0	0	0	0	0	0	0	0	0	0	0
LIKKRFAAG	502.315	0.01	60	8.9	11.17			0	0	0	418	0	0	0	0	0	0	0	0	0	0	0	0	0	0	0	0	0	0	0	0	0	0	0	0
CYNGM(+15.99)CQ	834.246	0.03	60	8.8	5.51		Oxidation (M)	0	0	0	431	0	0	0	0	0	0	0	0	0	0	0	0	0	0	0	0	0	0	0	0	0	0	0	0
VLAIKGRAT	464.803	0.01	60	13	11			0	0	0	0	0	0	0	0	0	0	431	0	0	0	0	0	0	0	0	0	0	0	0	0	0	0	0	0
KEHVAK	356.211	0.01	60	0	8.6			0	0	0	439	0	0	0	0	0	0	0	0	0	0	0	0	0	0	0	0	0	0	0	0	0	0	0	0
AGRSSSPAGET	510.243	0.02	60	1.6	6.05			0	0	0	0	0	0	0	0	0	0	0	0	0	0	445	0	0	0	0	0	0	0	0	0	0	0	0	0
GACGEAM(+15.99)	654.219	0.01	60	0	4		Oxidation (M)	0	0	0	0	0	0	0	0	0	0	0	0	0	0	464	0	0	0	0	0	0	0	0	0	0	0	0	0
QGGGSAGHPASRNKKILN(+.98)KKKLKRK	901.546	0.01	60	11.3	12.05		Deamidation (NQ)	0	0	0	0	0	0	0	0	0	471	0	0	0	0	0	0	0	0	0	0	0	0	0	0	0	0	0	0
VVLVGPSLK	456.306	0.01	60	3.6	8.72			0	0	0	0	0	0	0	0	0	474	0	0	0	0	0	0	0	0	0	0	0	0	0	0	0	0	0	0
NAGKA	460.251	0.01	60	0	8.75			0	0	0	0	0	0	0	0	0	0	0	0	0	0	477	0	0	0	0	0	0	0	0	0	0	0	0	0
RVLLVV	698.499	0.01	60	0	9.75			0	0	0	0	0	0	0	0	488	0	0	0	0	0	0	0	0	0	0	0	0	0	0	0	0	0	0	0
KDYEEVGIDSYEDEDEGE	1060.92	0.01	60	0	3.51	sp|P68366|TBA4A_HUMAN		0	0	0	0	0	0	0	0	232	258	0	0	0	0	0	0	0	0	0	0	0	0	0	0	0	0	0	0
VPEGSLPVHGEQAL	478.25	0.01	60	5.1	4.51			0	0	0	0	0	0	0	0	0	0	0	0	495	0	0	0	0	0	0	0	0	0	0	0	0	0	0	0
ASPGRGSHGQ(+.98)T	528.24	0.01	60	0	9.8		Deamidation (NQ)	0	0	500	0	0	0	0	0	0	0	0	0	0	0	0	0	0	0	0	0	0	0	0	0	0	0	0	0
HCSSSDS	722.24	0.03	60	6.9	5.08			404	0	0	0	0	0	0	0	0	12.7	0	10.3	0	5.93	85.4	0	0	0	0	0	0	0	0	0	0	0	0	0
VGSKTKEGVVHGVATVAE	589.992	0.02	60	1.7	6.73			0	0	0	0	0	0	0	0	0	0	0	0	523	0	0	0	0	0	0	0	0	0	0	0	0	0	0	0
RARIALVKN	520.832	0.02	60	6.1	12.01			0	0	0	0	0	0	0	0	0	0	0	0	0	0	0	0	536	0	0	0	0	0	0	0	0	0	0	0
HQ(+.98)VYTPSPSDYGCCGTCKN(+.98)VSCKFHMEN(+.98)GTSVVYA	954.649	0.01	60	12.6	6.88		Deamidation (NQ)	0	0	0	0	0	0	0	0	0	0	0	0	0	0	537	0	0	0	0	0	0	0	0	0	0	0	0	0
E(-18.01)CSPGSQ(+.98)PPSP	1068.43	0.01	60	0	4		Pyro-glu from E; Deamidation (NQ)	0	0	0	0	0	0	0	0	0	0	0	0	0	0	545	0	0	0	0	0	0	0	0	0	0	0	0	0
PASAGKLPAQVP	568.33	0.01	60	7.1	9.18	sp|O95714|HERC2_HUMAN		0	0	0	0	0	0	0	0	0	0	0	0	0	0	0	546	0	0	0	0	0	0	0	0	0	0	0	0
CGSGCCGP	683.181	0.01	60	0	5.5	sp|Q9BYP8|KR171_HUMAN		546	0	0	0	0	0	0	0	0	0	0	0	0	0	0	0	0	0	0	0	0	0	0	0	0	0	0	0
Q(+.98)RSHTGEKPYECNEC	594.567	0.01	60	11.6	5.5		Deamidation (NQ)	0	0	0	0	0	0	0	0	0	556	0	0	0	0	0	0	0	0	0	0	0	0	0	0	0	0	0	0
TILTGLQSHRVN(+.98)N(+.98)AFLF	967.027	0.01	60	0	9.44		Deamidation (NQ)	0	0	0	0	0	0	0	0	0	0	0	0	0	0	562	0	0	0	0	0	0	0	0	0	0	0	0	0
FPQ(+.98)LASLLAHQQCHV	846.937	0.01	60	6.8	6.91		Deamidation (NQ)	0	0	0	0	0	0	563	0	0	0	0	0	0	0	0	0	0	0	0	0	0	0	0	0	0	0	0	0
MLDLQSPSQQ(+.98)STVLRGLPPGTQIQIKVQAQGQ	1149.96	0.01	60	4.9	8.5		Deamidation (NQ)	0	0	0	0	0	0	0	0	0	0	0	0	297	269	0	0	0	0	0	0	0	0	0	0	0	0	0	0
RN(+.98)LAQ(+.98)GRNV	515.27	0.03	60	3.8	12		Deamidation (NQ)	0	0	0	577	0	0	0	0	0	0	0	0	0	0	0	0	0	0	0	0	0	0	0	0	0	0	0	0
SSGPYG	567.24	0.01	60	14.1	5.24			0	0	0	0	0	0	0	0	0	0	0	0	0	0	0	607	0	0	0	0	0	0	0	0	0	0	0	0
HGLGHGHEQQHGLGHGHKF	414.804	0.01	60	0	7.21			0	0	0	0	0	0	0	0	0	0	0	0	0	0	0	612	0	0	0	0	0	0	0	0	0	0	0	0
GEPDSPWTGSGGTTPSTPTTPTTEGEGDGLSY	1047.12	0.02	60	5.5	3.39			0	0	0	0	0	0	0	0	625	0	0	0	0	0	0	0	0	0	0	0	0	0	0	0	0	0	0	0
FGFLPAMIGG	505.262	0.02	60	1.9	5.52			0	0	0	0	0	632	0	0	0	0	0	0	0	0	0	0	0	0	0	0	0	0	0	0	0	0	0	0
DDNGDCT	739.217	0.01	60	5.8	3.42			0	644	0	0	0	0	0	0	0	0	0	0	0	0	0	0	0	0	0	0	0	0	0	0	0	0	0	0
QGSDLEM(+15.99)RNCQ(+.98)N(+.98)KPCPVDGSWSEWSLWEEC	1177.82	0.03	60	16.2	4.08		Oxidation (M); Deamidation (NQ)	0	0	0	0	0	0	660	0	0	0	0	0	0	0	0	0	0	0	0	0	0	0	0	0	0	0	0	0
PGPAGGAP	623.321	0.01	60	0	5.96			0	0	0	0	0	0	0	0	0	0	0	0	0	0	675	0	0	0	0	0	0	0	0	0	0	0	0	0
KTKEQVTNVGGAVVTG	529.962	0.01	60	0	8.59			0	0	0	0	0	0	0	0	0	0	0	0	0	0	698	0	0	0	0	0	0	0	0	0	0	0	0	0
YALLALLQ	452.78	0.01	60	0	5.52	sp|P01024|CO3_HUMAN		0	0	0	0	0	0	0	0	0	702	0	0	0	0	0	0	0	0	0	0	0	0	0	0	0	0	0	0
E(-18.01)ENVTGEQ(+.98)GGPDVVQ(+.98)PYAAYAPSGTPQ	915.753	0.01	60	10.2	3.5		Pyro-glu from E; Deamidation (NQ)	0	0	0	0	0	0	0	713	0	0	0	0	0	0	0	0	0	0	0	0	0	0	0	0	0	0	0	0
FPKSHSL	408.22	0.01	60	12.4	8.76			0	0	0	0	0	0	0	0	0	0	0	0	0	0	0	729	0	0	0	0	0	0	0	0	0	0	0	0
KRKVLGRR	1012.71	0.01	60	10.7	12.31			0	0	0	0	0	0	0	0	0	743	0	0	0	0	0	0	0	0	0	0	0	0	0	0	0	0	0	0
GESGNKGEPGSAGPQGPPGPSGE	1025.45	0.02	60	5	4.25			0	0	0	0	0	0	0	0	0	0	0	0	747	0	0	0	0	0	0	0	0	0	0	0	0	0	0	0
REKPRVQEKQHPVPPPAQNQN	496.265	0.04	60	6.5	9.99	sp|Q15942|ZYX_HUMAN		0	0	0	0	0	0	0	0	0	0	0	0	0	203	0	0	545	0	0	0	0	0	0	0	0	0	0	0
EGGPEAPIPPPPQPREKVS	661.346	0.01	60	7.2	4.79	sp|Q15942|ZYX_HUMAN		0	0	0	0	753	0	0	0	0	0	0	0	0	0	0	0	0	0	0	0	0	0	0	0	0	0	0	0
GAQGVPGPPGFQGEPGPQGEPGPP	553.513	0.06	60	4.8	3.79	sp|P25067|CO8A2_HUMAN		0	0	0	0	0	0	0	0	0	0	0	0	0	0	760	0	0	0	0	0	0	0	0	0	0	0	0	0
Q(-17.03)GSTEATLSPGSTTASSLGQQSTTFHSSPGDTET	1113.46	0.01	60	13.5	4.13		Pyro-glu from Q	0	0	0	0	0	0	0	0	0	0	0	0	779	0	0	0	0	0	0	0	0	0	0	0	0	0	0	0
VEGEIAEEAAEKA	449.221	0.01	60	1.1	3.98			0	0	0	0	0	0	0	0	0	0	0	788	0	0	0	0	0	0	0	0	0	0	0	0	0	0	0	0
KTKEGVLYVGSKTKEGVVH	515.545	0.01	60	0	9.4			0	0	0	0	0	0	0	0	0	0	0	0	0	0	792	0	0	0	0	0	0	0	0	0	0	0	0	0
EEYPDRIMNTF	707.816	0.02	60	5.4	4.14			0	795	0	0	0	0	0	0	0	0	0	0	0	0	0	0	0	0	0	0	0	0	0	0	0	0	0	0
QMVQ(+.98)VSDQDM(+15.99)N(+.98)T	707.298	0.03	60	12.8	3.56		Deamidation (NQ); Oxidation (M)	376	0	0	0	0	0	0	0	0	174	0	0	0	251	0	0	0	0	0	0	0	0	0	0	0	0	0	0
QGILQGLH	433.252	0.01	60	0	6.74			0	0	0	801	0	0	0	0	0	0	0	0	0	0	0	0	0	0	0	0	0	0	0	0	0	0	0	0
Q(-17.03)FTSSTSYN(+.98)RGDSTFESKS	704.966	0.01	60	13.1	6.07	sp|P02671|FIBA_HUMAN	Pyro-glu from Q; Deamidation (NQ)	0	0	0	0	0	0	0	0	0	0	0	0	479	0	0	339	0	0	0	0	0	0	0	0	0	0	0	0
TQVNEDCVGDG	568.723	0.02	60	6.4	3.49			322	0	0	0	0	0	0	0	0	0	0	0	0	0	502	0	0	0	0	0	0	0	0	0	0	0	0	0
TSKLGK	633.4	0.04	60	4.3	10			0	0	0	0	826	0	0	0	0	0	0	0	0	0	0	0	0	0	0	0	0	0	0	0	0	0	0	0
TLPRMKSSSSVTT	465.581	0.01	60	0	11			0	0	0	0	0	0	0	0	0	0	0	0	0	0	833	0	0	0	0	0	0	0	0	0	0	0	0	0
QECCC	585.139	0.01	60	0.9	4			0	0	0	0	0	0	0	0	624	0	0	0	0	0	211	0	0	0	0	0	0	0	0	0	0	0	0	0
AGSFGMNPQGAPWGQGGNGGPPNFGTNTQGAVAQ(+.98)PGYGSVRASN(+.98)QNEGCT	971.216	0.01	60	8.4	6.04		Deamidation (NQ)	0	0	0	0	0	839	0	0	0	0	0	0	0	0	0	0	0	0	0	0	0	0	0	0	0	0	0	0
S(+42.01)AM(+15.99)NNAGNA	907.354	0.01	60	0	5.24		Acetylation (Protein N-term); Oxidation (M)	0	0	0	0	0	0	0	0	0	0	0	0	0	0	858	0	0	0	0	0	0	0	0	0	0	0	0	0
KKVVI	586.414	0.01	60	10	10			0	0	0	0	0	553	0	0	0	0	0	0	311	0	0	0	0	0	0	0	0	0	0	0	0	0	0	0
HGPPNMM(+15.99)QPSLMGIHGNMNNQQAGTSGVPQVNLSN(+.98)M(+15.99)QGQ	1034.45	0.05	60	9.7	6.92	sp|Q14686|NCOA6_HUMAN	Oxidation (M); Deamidation (NQ)	0	0	0	0	0	0	0	0	0	0	0	0	0	878	0	0	0	0	0	0	0	0	0	0	0	0	0	0
TKENEGFTVTAEGK	504.248	0.01	60	6.5	4.78	sp|P01024|CO3_HUMAN		0	0	0	0	0	0	0	0	0	0	892	0	0	0	0	0	0	0	0	0	0	0	0	0	0	0	0	0
E(-18.01)SPQN	556.23	0.05	60	1.4	4	sp|Q14686|NCOA6_HUMAN	Pyro-glu from E	0	0	0	0	0	0	0	0	538	0	358	0	0	0	0	0	0	0	0	0	0	0	0	0	0	0	0	0
Q(+.98)GSEEYETTRGQI	500.229	0.01	60	5.9	4.25		Deamidation (NQ)	0	0	0	0	0	0	0	0	0	0	0	0	896	0	0	0	0	0	0	0	0	0	0	0	0	0	0	0
E(-18.01)HN(+.98)STMLESDLGTM(+15.99)VINSEDEEEEDGTMK	654.654	0.01	60	0	3.8		Pyro-glu from E; Deamidation (NQ); Oxidation (M)	0	902	0	0	0	0	0	0	0	0	0	0	0	0	0	0	0	0	0	0	0	0	0	0	0	0	0	0
CPGDCSGHG	832.241	0.01	60	14.4	5.08			0	0	0	0	0	0	0	0	0	0	910	0	0	0	0	0	0	0	0	0	0	0	0	0	0	0	0	0
E(-18.01)QGDDGD	717.231	0.07	60	5.2	3.37		Pyro-glu from E	0	0	0	0	0	0	597	0	0	0	0	0	0	0	315	0	0	0	0	0	0	0	0	0	0	0	0	0
QTAPNK	658.351	0.02	60	18.2	8.75			0	0	0	0	0	0	0	0	0	0	519	0	408	0	0	0	0	0	0	0	0	0	0	0	0	0	0	0
TKIVSVERREKIKKSL	479.3	0.03	60	1.3	10.45			0	0	0	0	0	0	0	0	0	0	0	930	0	0	0	0	0	0	0	0	0	0	0	0	0	0	0	0
PSVRGTETTGQ(+.98)SAAESVTTGPVT	559.264	0.01	60	12.7	4.53		Deamidation (NQ)	0	0	0	0	0	0	0	0	0	0	934	0	0	0	0	0	0	0	0	0	0	0	0	0	0	0	0	0
DSHSLTTNIMEIL	737.375	0.01	60	0	4.35	sp|P02671|FIBA_HUMAN		940	0	0	0	0	0	0	0	0	0	0	0	0	0	0	0	0	0	0	0	0	0	0	0	0	0	0	0
SSSGQHGSGLGESSGFGHHESSSGQSSSYSQ	1009.41	0.04	60	5.4	5.71			0	0	0	0	0	0	0	0	0	0	0	946	0	0	0	0	0	0	0	0	0	0	0	0	0	0	0	0
VQITSEIYSIPETVAQGSGQ(+.98)QLFDHIV	740.886	0.01	60	0.8	4.13		Deamidation (NQ)	0	0	0	0	952	0	0	0	0	0	0	0	0	0	0	0	0	0	0	0	0	0	0	0	0	0	0	0
FGSSVHIE	438.231	0.02	60	15.3	5.24			0	0	0	0	0	0	0	0	0	0	0	0	0	0	0	0	953	0	0	0	0	0	0	0	0	0	0	0
Q(+.98)CGCYHNGVYYEPEQTVLIDNCRQQCTCHAGKGMVCQEHSCKPGQVCQ(+.98)PSGGILS	1198.52	0.01	60	15.1	6.27		Deamidation (NQ)	0	0	0	0	0	0	0	963	0	0	0	0	0	0	0	0	0	0	0	0	0	0	0	0	0	0	0	0
KDYEEVGADSADGEDEGEE	1022.39	0.03	60	12.6	3.51			0	0	965	0	0	0	0	0	0	0	0	0	0	0	0	0	0	0	0	0	0	0	0	0	0	0	0	0
KDTWVEHWPEEDECQ(+.98)DEEN(+.98)QKQ(+.98)CQ	759.783	0.02	60	5.8	4.05	sp|P01024|CO3_HUMAN	Deamidation (NQ)	0	0	0	0	0	0	0	0	0	0	0	966	0	0	0	0	0	0	0	0	0	0	0	0	0	0	0	0
SKITHRIHWESA	488.928	0.01	60	3	8.51	sp|P01024|CO3_HUMAN		0	0	0	0	0	0	0	0	0	0	982	0	0	0	0	0	0	0	0	0	0	0	0	0	0	0	0	0
SADTGGDGESCLSQ(+.98)QDGAAGVPETN(+.98)A	1219.99	0.12	60	9.1	3.33		Deamidation (NQ)	0	0	0	0	0	0	0	0	0	1010	0	0	0	0	0	0	0	0	0	0	0	0	0	0	0	0	0	0
DMCSPDPCFNGGTCLVTWN(+.98)DFHCT	888.68	0.02	60	16	3.93		Deamidation (NQ)	0	0	0	0	0	0	1010	0	0	0	0	0	0	0	0	0	0	0	0	0	0	0	0	0	0	0	0	0
RAGCGAQ(+.98)IFF	1070.53	0.01	60	0	8.25		Deamidation (NQ)	1010	0	0	0	0	0	0	0	0	0	0	0	0	0	0	0	0	0	0	0	0	0	0	0	0	0	0	0
CPNPGCGNQ	445.167	0.03	60	2	5.51	sp|Q01844|EWS_HUMAN		0	0	0	0	0	0	0	0	0	0	0	0	0	0	0	0	1020	0	0	0	0	0	0	0	0	0	0	0
E(-18.01)KLKVAPPN	489.299	0.01	60	12.6	8.69		Pyro-glu from E	0	0	0	0	0	0	0	1020	0	0	0	0	0	0	0	0	0	0	0	0	0	0	0	0	0	0	0	0
SRPGGRASVDTKEAEGAPQVEAGKRLE	559.891	0.02	60	0	6.04			0	0	0	0	0	0	0	0	0	548	491	0	0	0	0	0	0	0	0	0	0	0	0	0	0	0	0	0
N(+.98)DCSQ(+.98)HGVCQDGV	682.237	0.04	60	7.8	4.2	sp|P22105|TENX_HUMAN	Deamidation (NQ)	0	0	0	0	0	0	0	0	0	0	0	1040	0	0	0	0	0	0	0	0	0	0	0	0	0	0	0	0
KPLFVR	759.48	0.01	60	9.5	11			0	0	0	0	0	0	0	1050	0	0	0	0	0	0	0	0	0	0	0	0	0	0	0	0	0	0	0	0
PQSFPNAGIPQ(+.98)ES	458.214	0.01	60	0	4		Deamidation (NQ)	0	0	0	0	0	0	0	0	0	0	0	1060	0	0	0	0	0	0	0	0	0	0	0	0	0	0	0	0
Q(-17.03)QTSSQM(+15.99)PASSTAPSSQETVQPTS	616.773	0.02	60	7.3	4		Pyro-glu from Q; Oxidation (M)	0	0	0	0	0	0	0	0	0	1070	0	0	0	0	0	0	0	0	0	0	0	0	0	0	0	0	0	0
Q(+.98)ERNTCESVDLRTQRNATGSAVSCETQ(+.98)ISEDFVDIQ(+.98)TDIESPADLDECSCL	1125.67	0.01	60	9.6	3.82		Deamidation (NQ)	0	0	0	0	0	0	0	0	0	988	0	0	0	0	93.6	0	0	0	0	0	0	0	0	0	0	0	0	0
TMYGCDM	410.637	0.03	60	6.5	3.8			0	0	0	0	0	0	0	0	0	482	0	0	611	0	0	0	0	0	0	0	0	0	0	0	0	0	0	0
GEIIQ(+.98)M(+15.99)N(+.98)SKMSLIFEPADL	1077.53	0.01	60	13.8	4.14		Deamidation (NQ); Oxidation (M)	0	0	0	0	0	0	0	0	0	0	0	1100	0	0	0	0	0	0	0	0	0	0	0	0	0	0	0	0
DN(+.98)EEGFFSA	508.694	0.04	60	6.6	3.57	sp|P02675|FIBB_HUMAN	Deamidation (NQ)	0	0	0	0	0	0	0	0	0	1110	0	0	0	0	0	0	0	0	0	0	0	0	0	0	0	0	0	0
QMSMN(+.98)N(+.98)SHS	519.187	0.02	60	3.2	6.74		Deamidation (NQ)	1110	0	0	0	0	0	0	0	0	0	0	0	0	0	0	0	0	0	0	0	0	0	0	0	0	0	0	0
Q(+42.01)PAGGP	568.265	0.01	60	0	5.52		Acetylation (Protein N-term)	0	0	0	0	0	0	0	0	0	0	0	0	0	0	0	0	1110	0	0	0	0	0	0	0	0	0	0	0
APWKEKSQ	973.518	0.01	60	0	8.64			0	0	1120	0	0	0	0	0	0	0	0	0	0	0	0	0	0	0	0	0	0	0	0	0	0	0	0	0
KQFTSSTSYNRGDST	560.258	0.01	60	0	8.59	sp|P02671|FIBA_HUMAN		1120	0	0	0	0	0	0	0	0	0	0	0	0	0	0	0	0	0	0	0	0	0	0	0	0	0	0	0
DGECEDVDECAMGTH	805.767	0.01	60	0	3.71			0	1120	0	0	0	0	0	0	0	0	0	0	0	0	0	0	0	0	0	0	0	0	0	0	0	0	0	0
FLLDALSEDFSGPQ(+.98)N(+.98)A	575.928	0.02	60	4.5	3.49		Deamidation (NQ)	0	0	0	0	0	0	0	0	0	0	0	747	0	0	378	0	0	0	0	0	0	0	0	0	0	0	0	0
MQNLQ	633.288	0.03	60	3.2	5.28			0	0	0	0	0	0	0	1130	0	0	0	0	0	0	0	0	0	0	0	0	0	0	0	0	0	0	0	0
M(+15.99)GSYQQNSM(+15.99)GSYGPQ(+.98)GGQ	955.387	0.01	60	9.8	5.27		Oxidation (M); Deamidation (NQ)	0	0	0	0	0	0	0	0	0	0	0	0	0	0	0	1130	0	0	0	0	0	0	0	0	0	0	0	0
PCDTF	582.229	0.01	60	0	3.8			1130	0	0	0	0	0	0	0	0	0	0	0	0	0	0	0	0	0	0	0	0	0	0	0	0	0	0	0
SVGAAICGLQQ	523.772	0.03	60	0.2	5.24			695	0	0	0	0	0	0	0	0	0	0	0	0	0	441	0	0	0	0	0	0	0	0	0	0	0	0	0
SSNETDSFSESPC	695.257	0.01	60	0	3.57			0	0	1140	0	0	0	0	0	0	0	0	0	0	0	0	0	0	0	0	0	0	0	0	0	0	0	0	0
EGEGPQN(+.98)PE	479.181	0.03	60	2.8	3.67		Deamidation (NQ)	0	0	0	0	1150	0	0	0	0	0	0	0	0	0	0	0	0	0	0	0	0	0	0	0	0	0	0	0
ENLRLKQQSELQ	495.936	0.01	60	0	6.24			0	0	0	0	0	0	0	0	0	0	0	1150	0	0	0	0	0	0	0	0	0	0	0	0	0	0	0	0
LEDKTERELLESY	542.273	0.01	60	5.4	4.25			0	0	0	0	0	0	0	1150	0	0	0	0	0	0	0	0	0	0	0	0	0	0	0	0	0	0	0	0
DISPVQ(+.98)TDALDSVRE	549.268	0.01	60	0	3.84		Deamidation (NQ)	0	0	0	0	0	0	0	0	0	1150	0	0	0	0	0	0	0	0	0	0	0	0	0	0	0	0	0	0
TQ(+.98)ECQ(+.98)DINECEQPGVCSGGQCT	583.456	0.01	60	2.9	3.5		Deamidation (NQ)	0	331	0	0	0	0	0	679	0	0	0	0	0	0	151	0	0	0	0	0	0	0	0	0	0	0	0	0
NTAGSFSCKDCDGGYRPSPLGDSCEDVDECEDPQSSCLGGECKN(+.98)TVGS	984.787	0.01	60	5	3.89		Deamidation (NQ)	0	417	0	0	0	0	750	0	0	0	0	0	0	0	0	0	0	0	0	0	0	0	0	0	0	0	0	0
SAIN(+.98)VVKILRVLRVLRPLRAIN(+.98)RAKGLKHV	681.839	0.01	60	14.8	12.61		Deamidation (NQ)	0	0	0	0	200	0	0	0	0	976	0	0	0	0	0	0	0	0	0	0	0	0	0	0	0	0	0	0
SATAQRV	732.381	0.03	60	18.2	9.47	sp|Q96HA7|TONSL_HUMAN		0	0	0	0	0	0	0	0	0	0	1180	0	0	0	0	0	0	0	0	0	0	0	0	0	0	0	0	0
KKPAGAAKK	449.796	0.01	60	8.2	10.48			0	0	0	0	0	0	1200	0	0	0	0	0	0	0	0	0	0	0	0	0	0	0	0	0	0	0	0	0
CTKIAKVEK	510.304	0.01	60	8.5	9.2			0	0	0	0	0	0	0	865	0	0	0	0	0	0	339	0	0	0	0	0	0	0	0	0	0	0	0	0
KKRLLVVRELKEQ	820.029	0.02	60	10.3	10.28			0	0	0	1210	0	0	0	0	0	0	0	0	0	0	0	0	0	0	0	0	0	0	0	0	0	0	0	0
ATYLEAQN(+.98)GTRDDS	514.561	0.01	60	0	4.03		Deamidation (NQ)	0	0	0	0	0	0	0	0	1220	0	0	0	0	0	0	0	0	0	0	0	0	0	0	0	0	0	0	0
KRNQCLKKMIHVFN(+.98)Q(+.98)LKK	753.429	0.01	60	0	10.6		Deamidation (NQ)	0	0	0	0	0	0	0	0	0	0	0	1220	0	0	0	0	0	0	0	0	0	0	0	0	0	0	0	0
QGSCT	495.184	0.01	60	0	5.52			1240	0	0	0	0	0	0	0	0	0	0	0	0	0	0	0	0	0	0	0	0	0	0	0	0	0	0	0
Q(-17.03)MPNDQEEESFAEGHSE	973.868	0.01	60	0	3.83		Pyro-glu from Q	0	0	0	0	0	0	0	0	1250	0	0	0	0	0	0	0	0	0	0	0	0	0	0	0	0	0	0	0
RGPAGPN(+.98)GADGPQ(+.98)GPPGGVGN	610.952	0.02	60	11.5	5.84		Deamidation (NQ)	0	0	0	0	0	0	0	1260	0	0	0	0	0	0	0	0	0	0	0	0	0	0	0	0	0	0	0	0
GTTGSLAEVTGT	547.276	0.01	60	0	4			0	0	0	0	0	0	1260	0	0	0	0	0	0	0	0	0	0	0	0	0	0	0	0	0	0	0	0	0
SREKSSQ(+.98)ESGEETGSQEN(+.98)HPQ(+.98)	1167.47	0.01	60	0	4.64		Deamidation (NQ)	0	0	0	0	0	0	0	0	0	0	0	0	0	0	1260	0	0	0	0	0	0	0	0	0	0	0	0	0
EHFQEVGYAAPPSPPLS	913.439	0.01	60	3.3	4.51			1270	0	0	0	0	0	0	0	0	0	0	0	0	0	0	0	0	0	0	0	0	0	0	0	0	0	0	0
ELGHGADTQ(+.98)SSESP	472.527	0.01	60	0	4.13		Deamidation (NQ)	0	0	0	0	1270	0	0	0	0	0	0	0	0	0	0	0	0	0	0	0	0	0	0	0	0	0	0	0
KGPGPGGPGGAGVARGGAGGGP	563.291	0.03	60	6.1	11			0	0	0	0	0	0	0	0	0	0	0	461	0	0	812	0	0	0	0	0	0	0	0	0	0	0	0	0
Q(+.98)KPTVIATSTTS	617.824	0.09	60	6.3	8.75		Deamidation (NQ)	0	0	0	0	0	0	0	0	0	0	0	0	0	0	0	1280	0	0	0	0	0	0	0	0	0	0	0	0
FNDLLVILKL	594.381	0.01	60	6	5.84			0	0	0	0	0	0	0	0	0	0	0	0	0	0	0	1280	0	0	0	0	0	0	0	0	0	0	0	0
E(-18.01)GDGDSSH	785.251	0.01	60	5.8	4.02		Pyro-glu from E	0	1280	0	0	0	0	0	0	0	0	0	0	0	0	0	0	0	0	0	0	0	0	0	0	0	0	0	0
TKKLIIDVI	521.849	0.01	60	0	8.26			0	0	0	0	0	1290	0	0	0	0	0	0	0	0	0	0	0	0	0	0	0	0	0	0	0	0	0	0
VEVTG	504.264	0.01	60	0	4	sp|O60291|MGRN1_HUMAN		0	0	0	0	0	0	0	0	0	0	1300	0	0	0	0	0	0	0	0	0	0	0	0	0	0	0	0	0
HIHGESSSKKLQRSQ(+.98)RISDSDI	502.662	0.01	60	10.7	8.6		Deamidation (NQ)	0	0	0	1300	0	0	0	0	0	0	0	0	0	0	0	0	0	0	0	0	0	0	0	0	0	0	0	0
KGNMGPQ(+.98)GEPGPPGQQ(+.98)GN(+.98)PGP	1002.44	0.01	60	6.7	6		Deamidation (NQ)	0	0	0	0	0	0	1320	0	0	0	0	0	0	0	0	0	0	0	0	0	0	0	0	0	0	0	0	0
IGISLAIWLLILLVT	546.696	0.01	60	0	5.52			0	0	0	0	0	1320	0	0	0	0	0	0	0	0	0	0	0	0	0	0	0	0	0	0	0	0	0	0
KKVAEIHQ(+.98)ALNSDPTDVAALRRMA	659.608	0.01	60	13	8.6		Deamidation (NQ)	0	621	0	0	0	0	0	0	0	0	0	0	0	0	707	0	0	0	0	0	0	0	0	0	0	0	0	0
AQAEGKFAQ	475.234	0.02	60	5	6.05			0	0	0	0	0	0	0	0	0	0	660	0	0	0	0	673	0	0	0	0	0	0	0	0	0	0	0	0
KN(+.98)HEEEM(+15.99)KNMQGSSGGEVTVEMN(+.98)AAPGT	745.809	0.01	60	15.2	4.64		Deamidation (NQ); Oxidation (M)	0	0	0	0	0	0	0	0	0	0	1340	0	0	0	0	0	0	0	0	0	0	0	0	0	0	0	0	0
CAAGGQGH	350.643	0.01	60	3.8	6.73			0	0	0	0	0	0	0	0	0	0	0	0	0	0	0	1360	0	0	0	0	0	0	0	0	0	0	0	0
E(-18.01)EGGPT	571.239	0.01	60	0	3.8		Pyro-glu from E	1370	0	0	0	0	0	0	0	0	0	0	0	0	0	0	0	0	0	0	0	0	0	0	0	0	0	0	0
AKLIVPNSTA	507.31	0.01	60	11.8	8.8			0	0	0	0	0	1370	0	0	0	0	0	0	0	0	0	0	0	0	0	0	0	0	0	0	0	0	0	0
GPDSPACLEGEM(+15.99)GT	690.275	0.03	60	9.7	3.57		Oxidation (M)	0	0	0	0	0	0	1200	0	0	0	0	0	0	0	172	0	0	0	0	0	0	0	0	0	0	0	0	0
Q(-17.03)CCPDCT	752.195	0.01	60	11.2	3.8		Pyro-glu from Q	1330	0	0	0	0	0	0	0	0	53.5	0	0	0	0	0	0	0	0	0	0	0	0	0	0	0	0	0	0
ASPPRQAGWSSQ	424.535	0.04	60	0.9	9.79			984	0	0	0	0	0	0	0	0	0	0	0	0	0	179	229	0	0	0	0	0	0	0	0	0	0	0	0
QQGGNCIYTDS	593.237	0.07	60	3.5	3.8			0	0	0	0	0	0	0	0	1010	0	0	0	0	387	0	0	0	0	0	0	0	0	0	0	0	0	0	0
KEN(+.98)KELVKRATIDIKTLVTLREDLVSEKLKTQ(+.98)Q	968.069	0.01	60	19.5	9.31		Deamidation (NQ)	0	0	0	0	0	0	1400	0	0	0	0	0	0	0	0	0	0	0	0	0	0	0	0	0	0	0	0	0
CCPQ(+.98)EATM(+15.99)Q(+.98)E	386.469	0.01	60	0	3.79		Deamidation (NQ); Oxidation (M)	0	1400	0	0	0	0	0	0	0	0	0	0	0	0	0	0	0	0	0	0	0	0	0	0	0	0	0	0
ADGDCEDDEDDDGVDEDAEEEGDGEEAG	967.981	0.01	60	6	2.87			0	0	0	0	0	0	0	0	0	0	0	1400	0	0	0	0	0	0	0	0	0	0	0	0	0	0	0	0
NPVCGP	586.263	0.01	60	0	5.52			1410	0	0	0	0	0	0	0	0	0	0	0	0	0	0	0	0	0	0	0	0	0	0	0	0	0	0	0
DEAGSEADHEGTHSTKRGHA	419.188	0.02	60	0.4	5.29	sp|P02671|FIBA_HUMAN		406	0	641	0	0	369	0	0	0	0	0	0	0	0	0	0	0	0	0	0	0	0	0	0	0	0	0	0
LQLGVQLLPKKLVVHIRGKQ(+.98)P	1183.24	0.01	60	0	11.26		Deamidation (NQ)	0	0	0	1420	0	0	0	0	0	0	0	0	0	0	0	0	0	0	0	0	0	0	0	0	0	0	0	0
SELFSGLPQKKIVVEFSSPNVAKKFHVGHLRSTIIGN(+.98)FIANLKEA	991.14	0.01	60	3.2	9.82		Deamidation (NQ)	0	0	0	0	0	0	0	0	0	0	0	0	1420	0	0	0	0	0	0	0	0	0	0	0	0	0	0	0
PMACHEGGVGVG	1113.47	0.01	60	0.7	5.25			186	0	0	1240	0	0	0	0	0	0	0	0	0	0	0	0	0	0	0	0	0	0	0	0	0	0	0	0
KRESKIEHGN(+.98)	599.818	0.08	60	3	8.6		Deamidation (NQ)	0	0	0	0	0	0	0	0	0	0	0	0	0	1430	0	0	0	0	0	0	0	0	0	0	0	0	0	0
TCSCGT	571.199	0.02	60	5.3	5.18			0	1430	0	0	0	0	0	0	0	0	0	0	0	0	0	0	0	0	0	0	0	0	0	0	0	0	0	0
GQ(+.98)PGAKGANGAPGIAGAPGFPGA	960.967	0.03	60	11.2	8.75		Deamidation (NQ)	0	0	0	0	0	0	0	0	0	0	0	0	0	1440	0	0	0	0	0	0	0	0	0	0	0	0	0	0
Q(-17.03)DADDMCMICF	637.697	0.01	60	8.2	3.42		Pyro-glu from Q	0	0	0	0	0	0	0	0	0	0	0	1440	0	0	0	0	0	0	0	0	0	0	0	0	0	0	0	0
YKMADEAGSEADHEGTHSTKRGHA	517.834	0.06	60	2.4	5.78	sp|P02671|FIBA_HUMAN		0	0	909	0	0	0	0	537	0	0	0	0	0	0	0	0	0	0	0	0	0	0	0	0	0	0	0	0
CTLTAHEGRGGKCTEEGDASQ(+.98)QEGCTLGSDPICLSESQVSEEQ(+.98)EEMGGQ(+.98)SSA	1070.62	0.01	60	16.3	3.99		Deamidation (NQ)	0	0	1450	0	0	0	0	0	0	0	0	0	0	0	0	0	0	0	0	0	0	0	0	0	0	0	0	0
D(+42.01)GDSSCGDVCFM(+15.99)	647.204	0.01	60	7.2	3.42		Acetylation (Protein N-term); Oxidation (M)	0	0	187	0	0	0	0	0	0	0	0	0	0	0	1270	0	0	0	0	0	0	0	0	0	0	0	0	0
TNICHAA	365.168	0.03	60	8.6	6.4			0	0	0	0	0	1460	0	0	0	0	0	0	0	0	0	0	0	0	0	0	0	0	0	0	0	0	0	0
VKCKNCGAFGHSA	441.204	0.01	60	0	8.9			0	0	0	0	0	0	0	0	0	0	0	0	0	0	0	0	1460	0	0	0	0	0	0	0	0	0	0	0
GLSAGCGSGSSSVTPN(+.98)SGGTPFSQDT	1180.01	0.12	60	4.9	3.8		Deamidation (NQ)	0	0	0	0	0	0	0	0	0	0	0	0	0	1480	0	0	0	0	0	0	0	0	0	0	0	0	0	0
YVRGN(+.98)DLELDSSDDWQTYHNEM(+15.99)C	936.375	0.01	60	0	3.96		Deamidation (NQ); Oxidation (M)	0	0	0	0	0	0	0	0	0	0	0	0	0	0	1500	0	0	0	0	0	0	0	0	0	0	0	0	0
RPGPPPVRQ	502.301	0.01	60	2.8	12			0	0	0	0	0	0	0	0	0	852	651	0	0	0	0	0	0	0	0	0	0	0	0	0	0	0	0	0
KYN(+.98)KEQQLKKITAKQKHLQAILGGA	946.566	0.01	60	5.5	10.13		Deamidation (NQ)	0	0	0	0	0	0	0	0	0	1510	0	0	0	0	0	0	0	0	0	0	0	0	0	0	0	0	0	0
N(+.98)N(+.98)ETRPSVQEDSQAFNPDNPYHQ(+.98)QEG	751.827	0.02	60	7.1	4.17		Deamidation (NQ)	0	1520	0	0	0	0	0	0	0	0	0	0	0	0	0	0	0	0	0	0	0	0	0	0	0	0	0	0
RGMPGLPGPAGTPGKVGPTGATGDKGPPGPVGPP	607.121	0.01	60	2.1	9.99	sp|P05997|CO5A2_HUMAN		0	0	0	0	0	0	0	0	0	0	0	0	0	0	0	0	1520	0	0	0	0	0	0	0	0	0	0	0
LSGDH	528.238	0.02	60	8	5.08			0	0	269	0	216	129	521	0	0	0	0	0	0	0	0	392	0	0	0	0	0	0	0	0	0	0	0	0
GSSVSTMTSQYQ(+.98)EGDDSM(+15.99)GKKHS	1232.5	0.02	60	10.4	5.38	sp|Q8N7U7|TPRX1_HUMAN	Deamidation (NQ); Oxidation (M)	773	0	0	768	0	0	0	0	0	0	0	0	0	0	0	0	0	0	0	0	0	0	0	0	0	0	0	0
KFSPGAPGGSGSQPNQKLGHPEALSAGTGSPQPPSFTYAQQ	1017.25	0.02	60	7.2	8.51	sp|Q15942|ZYX_HUMAN		0	0	0	0	0	0	0	1550	0	0	0	0	0	0	0	0	0	0	0	0	0	0	0	0	0	0	0	0
EENDDDDDDDDEEDGVFDDEDEEEENIESKVTKPVQ	1051.15	0.01	60	0	3.33			0	1550	0	0	0	0	0	0	0	0	0	0	0	0	0	0	0	0	0	0	0	0	0	0	0	0	0	0
SVYGSRKTLFVLAHTDRVSGLLRASFLLAQ(+.98)	1102.97	0.02	60	0	10.9		Deamidation (NQ)	0	1560	0	0	0	0	0	0	0	0	0	0	0	0	0	0	0	0	0	0	0	0	0	0	0	0	0	0
ERGGAGGM(+15.99)QQGSSPAP	751.833	0.01	60	13	6.1		Oxidation (M)	0	0	0	0	0	0	0	0	0	0	0	0	0	0	1560	0	0	0	0	0	0	0	0	0	0	0	0	0
TLHGP	524.282	0.01	60	2.9	6.4			0	0	0	0	0	0	0	770	0	0	0	0	0	818	0	0	0	0	0	0	0	0	0	0	0	0	0	0
IHAASASV	378.213	0.02	60	2.8	6.74			0	872	0	0	0	0	0	0	0	0	738	0	0	0	0	0	0	0	0	0	0	0	0	0	0	0	0	0
SSSSSASSSSGSSTTSPSSSAS	382.761	0.01	60	0	5.24			0	0	0	1610	0	0	0	0	0	0	0	0	0	0	0	0	0	0	0	0	0	0	0	0	0	0	0	0
Q(+.98)AIQ(+.98)MACQSLGEPGCTQAQVLS	567	0.01	60	6.5	4		Deamidation (NQ)	0	0	0	0	0	0	0	0	0	0	1610	0	0	0	0	0	0	0	0	0	0	0	0	0	0	0	0	0
Q(-17.03)GSAH	482.202	0.01	60	3	6.74		Pyro-glu from Q	0	0	0	333	0	0	1280	0	0	0	0	0	0	0	0	0	0	0	0	0	0	0	0	0	0	0	0	0
QANQ(+.98)GN(+.98)SYSPAPLDLSN(+.98)V	626.614	0.02	60	6.9	3.8		Deamidation (NQ)	0	0	0	931	0	0	0	0	0	0	0	0	0	0	693	0	0	0	0	0	0	0	0	0	0	0	0	0
DAGEMVRQARILA	477.256	0.01	60	0	6.07			0	0	0	0	0	0	0	0	0	0	0	1630	0	0	0	0	0	0	0	0	0	0	0	0	0	0	0	0
AYSGANGILK	497.278	0.02	60	14.2	8.63			0	0	0	674	0	0	0	0	0	961	0	0	0	0	0	0	0	0	0	0	0	0	0	0	0	0	0	0
E(-18.01)NSETFA	779.313	0.01	60	10.6	3.8		Pyro-glu from E	0	0	0	0	0	0	0	0	0	0	1640	0	0	0	0	0	0	0	0	0	0	0	0	0	0	0	0	0
ATTLPSPQM(+15.99)LKGKILVKGKKLPAN	850.532	0.01	60	7.2	10.6		Oxidation (M)	0	0	0	0	0	1640	0	0	0	0	0	0	0	0	0	0	0	0	0	0	0	0	0	0	0	0	0	0
ALPPYLTPDA	529.281	0.01	60	0	3.8			0	0	0	0	0	1640	0	0	0	0	0	0	0	0	0	0	0	0	0	0	0	0	0	0	0	0	0	0
KGHPGPPGLPGNGLPGLPGPRGLPGDKGKDGLPGQQGLPGSKG	1004.8	0.01	60	1.6	10			0	0	0	0	0	0	0	0	0	0	0	0	0	1650	0	0	0	0	0	0	0	0	0	0	0	0	0	0
NTEAM(+15.99)ELANRR	660.816	0.03	60	7.2	6.14		Oxidation (M)	0	0	0	0	0	0	0	0	0	0	0	1660	0	0	0	0	0	0	0	0	0	0	0	0	0	0	0	0
CASRCDCDHSDGCDPVHGRCQ(+.98)CQ(+.98)AG	656.973	0.02	60	2.1	5.2		Deamidation (NQ)	0	1060	0	0	0	0	0	0	0	609	0	0	0	0	0	0	0	0	0	0	0	0	0	0	0	0	0	0
KACQVTQ(+.98)SRN	568.293	0.01	60	9.5	9.51		Deamidation (NQ)	0	0	666	0	0	0	551	0	0	0	230	0	0	0	237	0	0	0	0	0	0	0	0	0	0	0	0	0
SREMAARALVPFVMI	564.318	0.01	60	10	9.31			0	0	821	0	866	0	0	0	0	0	0	0	0	0	0	0	0	0	0	0	0	0	0	0	0	0	0	0
LVMDDEIESEAKKES	574.941	0.01	60	0.6	4.08			0	0	0	0	0	0	0	0	0	0	0	0	0	1690	0	0	0	0	0	0	0	0	0	0	0	0	0	0
PPDVPDHAAYHPF	488.229	0.03	60	2.8	5.05			0	0	721	0	0	0	0	0	0	0	0	0	0	0	0	979	0	0	0	0	0	0	0	0	0	0	0	0
NAEELKARISASAEELRQ	672.354	0.02	60	3.8	4.95			0	0	0	0	0	0	0	1710	0	0	0	0	0	0	0	0	0	0	0	0	0	0	0	0	0	0	0	0
STCDICQFGAECDEDAEDVWCVCNIDCSQT	661.244	0.01	60	3.1	3.16			0	1720	0	0	0	0	0	0	0	0	0	0	0	0	0	0	0	0	0	0	0	0	0	0	0	0	0	0
A(+42.01)DMQNLVERLE	680.33	0.03	60	3.1	4.14		Acetylation (Protein N-term)	0	0	0	0	0	0	0	0	0	51.4	213	933	0	0	0	0	529	0	0	0	0	0	0	0	0	0	0	0
CPCGSCC	672.157	0.02	60	9.6	5.5			0	0	0	729	0	0	0	0	0	0	1000	0	0	0	0	0	0	0	0	0	0	0	0	0	0	0	0	0
KKKVIMKKRKKLTLTR	667.112	0.01	60	13.9	12.05			0	0	0	0	0	0	0	0	0	0	1740	0	0	0	0	0	0	0	0	0	0	0	0	0	0	0	0	0
SYALTSEEAERSDGDPVQPAVLQVHQ	942.784	0.01	60	0	4.17			0	0	0	0	0	0	0	0	1770	0	0	0	0	0	0	0	0	0	0	0	0	0	0	0	0	0	0	0
ECQ(+.98)N(+.98)GPVCQ(+.98)RNAECINTAGSYR	805.999	0.01	60	4.1	6.21		Deamidation (NQ)	0	0	0	0	0	0	0	0	1430	0	0	0	0	347	0	0	0	0	0	0	0	0	0	0	0	0	0	0
SCTDN(+.98)Q(+.98)DGTCS	566.675	0.02	60	0.9	3.56		Deamidation (NQ)	0	0	0	0	0	0	1790	0	0	0	0	0	0	0	0	0	0	0	0	0	0	0	0	0	0	0	0	0
HELQEKLSPLGEEMRDRA	535.271	0.01	60	0	4.96			0	0	0	0	0	1790	0	0	0	0	0	0	0	0	0	0	0	0	0	0	0	0	0	0	0	0	0	0
DQKEDSQSRQ(+.98)GGYSMHQLQG	1140.5	0.03	60	19.5	5.38		Deamidation (NQ)	0	0	0	0	0	0	0	0	0	0	0	1810	0	0	0	0	0	0	0	0	0	0	0	0	0	0	0	0
SEMVVAGKLQD	588.799	0.02	60	1.2	4.37			1810	0	0	0	0	0	0	0	0	0	0	0	0	0	0	0	0	0	0	0	0	0	0	0	0	0	0	0
EGDGT	478.186	0.01	60	0	3.67			0	0	0	0	0	0	1810	0	0	0	0	0	0	0	0	0	0	0	0	0	0	0	0	0	0	0	0	0
SGSAHST	646.293	0.01	60	0.5	6.46			0	0	0	0	0	0	0	1810	0	0	0	0	0	0	0	0	0	0	0	0	0	0	0	0	0	0	0	0
QSN(+.98)LFKKQ(+.98)ECRDILLPVITKELKELLEQK	872.241	0.01	60	0	8.14		Deamidation (NQ)	0	0	0	0	0	0	0	0	0	0	0	1810	0	0	0	0	0	0	0	0	0	0	0	0	0	0	0	0
ACHSCSEDSGSDVSS	735.763	0.02	60	9.7	4.02			1820	0	0	0	0	0	0	0	0	0	0	0	0	0	0	0	0	0	0	0	0	0	0	0	0	0	0	0
DSTVSASEAENGV	633.287	0.01	60	3.5	3.57			0	0	1820	0	0	0	0	0	0	0	0	0	0	0	0	0	0	0	0	0	0	0	0	0	0	0	0	0
PGGAEGGGV	700.325	0.01	60	0	4			1830	0	0	0	0	0	0	0	0	0	0	0	0	0	0	0	0	0	0	0	0	0	0	0	0	0	0	0
SQEQ(+.98)LAQ(+.98)VAANA	616.295	0.03	60	12.1	4		Deamidation (NQ)	1840	0	0	0	0	0	0	0	0	0	0	0	0	0	0	0	0	0	0	0	0	0	0	0	0	0	0	0
TVTQNVEVPETPKASKALE	681.031	0.02	60	5	4.78			0	0	0	0	1840	0	0	0	0	0	0	0	0	0	0	0	0	0	0	0	0	0	0	0	0	0	0	0
DDTQFVRFDSDAASPR	609.611	0.02	60	5.3	4.14			0	0	0	0	0	0	0	0	0	0	0	0	0	1840	0	0	0	0	0	0	0	0	0	0	0	0	0	0
Q(-17.03)YNPEPPPPRTHYSNIE	1011.48	0.01	60	0	5.4		Pyro-glu from Q	0	0	0	0	0	0	0	0	0	0	0	0	0	0	0	0	1850	0	0	0	0	0	0	0	0	0	0	0
RLSMDTPMPELQ(+.98)VGPQ(+.98)EQ	515.241	0.01	60	0	4.14		Deamidation (NQ)	0	0	0	0	1850	0	0	0	0	0	0	0	0	0	0	0	0	0	0	0	0	0	0	0	0	0	0	0
KKRGT	589.369	0.04	60	8.1	11.17	sp|A3KMH1|VWA8_HUMAN		0	0	0	0	0	0	1590	0	0	0	0	0	263	0	0	0	0	0	0	0	0	0	0	0	0	0	0	0
KIITILVTAT	536.854	0.03	60	10	8.75			0	0	0	0	507	0	0	0	0	1350	0	0	0	0	0	0	0	0	0	0	0	0	0	0	0	0	0	0
SSPGSPGT	689.31	0.01	60	0	5.24			0	1860	0	0	0	0	0	0	0	0	0	0	0	0	0	0	0	0	0	0	0	0	0	0	0	0	0	0
RCSGAAGAGPAES	567.257	0.02	60	2.4	5.99			0	0	0	0	0	1880	0	0	0	0	0	0	0	0	0	0	0	0	0	0	0	0	0	0	0	0	0	0
TLFSVLVRPPPPLS	761.938	0.01	60	0	9.41			0	0	1900	0	0	0	0	0	0	0	0	0	0	0	0	0	0	0	0	0	0	0	0	0	0	0	0	0
AIQDPRLFAEEKAVADTRDQADGSRASVDSGSSEEQGGSSRA	871.012	0.01	60	7.3	4.36			0	0	0	0	1920	0	0	0	0	0	0	0	0	0	0	0	0	0	0	0	0	0	0	0	0	0	0	0
KQAVR	601.378	0.01	60	2.6	11			0	0	0	0	0	0	0	1050	0	0	0	0	0	0	0	880	0	0	0	0	0	0	0	0	0	0	0	0
KNCSN	565.24	0.04	60	8.2	8.22			0	0	0	0	0	267	0	0	0	0	0	0	0	900	0	779	0	0	0	0	0	0	0	0	0	0	0	0
DPVQPAVLQVHQ	665.86	0.01	60	0	5.08			0	0	0	0	0	0	0	0	0	0	0	0	0	0	0	0	1950	0	0	0	0	0	0	0	0	0	0	0
GSSVDAGCGTGSSGSACAT	787.794	0.01	60	19.9	3.8			0	1950	0	0	0	0	0	0	0	0	0	0	0	0	0	0	0	0	0	0	0	0	0	0	0	0	0	0
TNQLQYLQ	504.255	0.02	60	18.4	5.18			0	0	0	0	1590	370	0	0	0	0	0	0	0	0	0	0	0	0	0	0	0	0	0	0	0	0	0	0
HLGPVV	621.376	0.04	60	4.6	6.74			619	0	273	0	0	0	0	0	0	0	0	0	326	438	0	306	0	0	0	0	0	0	0	0	0	0	0	0
YQIVLDAAT	497.26	0.01	60	9.3	3.8			0	0	0	1030	602	0	335	0	0	0	0	0	0	0	0	0	0	0	0	0	0	0	0	0	0	0	0	0
IHWESASLLR	404.556	0.01	60	0	6.75	sp|P01024|CO3_HUMAN		0	0	0	0	0	0	0	0	0	0	0	0	1970	0	0	0	0	0	0	0	0	0	0	0	0	0	0	0
TPGVCA	547.25	0.01	60	2.8	5.18			0	0	0	262	0	0	0	0	0	0	0	0	0	0	0	1710	0	0	0	0	0	0	0	0	0	0	0	0
SDASKKRLIEDTEDWRPR	551.287	0.01	60	5.4	5.97			0	0	0	0	0	0	0	0	0	0	0	994	0	0	0	982	0	0	0	0	0	0	0	0	0	0	0	0
DVLDSLTTIPEL	658.346	0.04	60	6.9	3.49			0	0	863	0	0	0	0	0	0	371	0	0	0	0	0	0	748	0	0	0	0	0	0	0	0	0	0	0
GEPKEVVKPVPITSPAVSKVT	541.315	0.01	60	0	8.5			0	0	1990	0	0	0	0	0	0	0	0	0	0	0	0	0	0	0	0	0	0	0	0	0	0	0	0	0
PVSKILGK	841.547	0.01	60	7	10.02	sp|Q86U86|PB1_HUMAN		2000	0	0	0	0	0	0	0	0	0	0	0	0	0	0	0	0	0	0	0	0	0	0	0	0	0	0	0
KMADEAGSEADHEGTHST	468.947	0.1	60	3.8	4.49	sp|P02671|FIBA_HUMAN		580	0	667	0	329	0	0	429	0	0	0	0	0	0	0	0	0	0	0	0	0	0	0	0	0	0	0	0
QKLPHLK	432.28	0.03	60	8	10			0	136	0	671	234	380	0	0	87.9	0	0	0	189	100	0	216	0	0	0	0	0	0	0	0	0	0	0	0
LIAYK	607.396	0.01	60	9.8	8.59			0	0	871	0	0	0	0	0	0	0	0	0	1150	0	0	0	0	0	0	0	0	0	0	0	0	0	0	0
QAQ(+.98)SGPQG	773.309	0.06	60	7.9	5.52		Deamidation (NQ)	0	0	0	0	0	0	0	1030	0	0	0	0	994	0	0	0	0	0	0	0	0	0	0	0	0	0	0	0
FTSSTSYN(+.98)RGDSTFESKSYKMA	832.372	0.02	60	4.4	8.43	sp|P02671|FIBA_HUMAN	Deamidation (NQ)	0	0	0	0	0	0	0	0	0	0	0	0	0	2030	0	0	0	0	0	0	0	0	0	0	0	0	0	0
QGSLCQDHVN(+.98)PCESRPCQ(+.98)NGATCMAQ(+.98)PSGYLCQCAPGYDGQNCSKELD	1022.6	0.02	60	7.4	4.43		Deamidation (NQ)	0	0	0	0	0	982	0	0	0	0	0	0	0	0	0	1060	0	0	0	0	0	0	0	0	0	0	0	0
HATKTAKDALSSVQESQVAQQA	766.727	0.01	60	3.4	6.75			0	0	637	0	0	1410	0	0	0	0	0	0	0	0	0	0	0	0	0	0	0	0	0	0	0	0	0	0
KAPVLL	640.427	0.03	60	6.7	8.75			0	0	0	2070	0	0	0	0	0	0	0	0	0	0	0	0	0	0	0	0	0	0	0	0	0	0	0	0
GSMAKK	621.341	0.02	60	3.9	10			0	0	0	0	0	0	0	0	0	0	2070	0	0	0	0	0	0	0	0	0	0	0	0	0	0	0	0	0
DSLQRQTPRHAAPGKD	592.974	0.01	60	4.9	8.75			0	0	0	2070	0	0	0	0	0	0	0	0	0	0	0	0	0	0	0	0	0	0	0	0	0	0	0	0
KSYKPEIQNKLLIIKKKAKHK	634.656	0.01	60	9.1	10.3			0	0	0	0	0	0	0	0	0	0	970	0	0	0	1120	0	0	0	0	0	0	0	0	0	0	0	0	0
VSSVADVLAQ(+.98)GGG	580.793	0.03	60	3.2	3.8		Deamidation (NQ)	1470	0	0	0	0	0	0	0	0	0	0	0	0	0	633	0	0	0	0	0	0	0	0	0	0	0	0	0
SAVQAAHLGTLCSQ(+.98)SLPLAASLKHT	835.771	0.01	60	4.8	7.99		Deamidation (NQ)	0	0	0	539	0	0	0	0	0	1570	0	0	0	0	0	0	0	0	0	0	0	0	0	0	0	0	0	0
Q(-17.03)QN(+.98)AQGGFSST	1108.44	0.01	60	0	5.52		Pyro-glu from Q; Deamidation (NQ)	0	0	0	0	0	0	0	0	0	0	0	0	0	2110	0	0	0	0	0	0	0	0	0	0	0	0	0	0
VQPQPQPKPQVQLHVQ	617.675	0.01	60	0	8.73	sp|Q15942|ZYX_HUMAN		0	0	0	0	0	0	0	0	0	0	0	2110	0	0	0	0	0	0	0	0	0	0	0	0	0	0	0	0
NDGLC	521.196	0.01	60	4.2	3.8			0	0	0	2110	0	0	0	0	0	0	0	0	0	0	0	0	0	0	0	0	0	0	0	0	0	0	0	0
QGPQ(+.98)GMLGPAQ(+.98)VAVLQQQHPGALGPQGPHRQVLM(+15.99)TQ	943.974	0.01	60	0	9.76		Deamidation (NQ); Oxidation (M)	0	0	0	0	0	0	0	2110	0	0	0	0	0	0	0	0	0	0	0	0	0	0	0	0	0	0	0	0
Q(-17.03)EKNPLPSKETIEQEK	627.655	0.01	60	0	4.95	sp|P62328|TYB4_HUMAN	Pyro-glu from Q	0	0	0	0	0	0	0	0	0	0	0	0	0	0	0	0	2120	0	0	0	0	0	0	0	0	0	0	0
Q(-17.03)LQLIIKKVIA	625.419	0.03	60	11.5	10		Pyro-glu from Q	0	0	0	177	0	1200	0	751	0	0	0	0	0	0	0	0	0	0	0	0	0	0	0	0	0	0	0	0
S(+42.01)DKPDM(+15.99)AEIEKFDKSKLKKTETQEKNPLPSKETIEQEKQAGES	1245.13	0.04	60	8	5.02	sp|P62328|TYB4_HUMAN	Acetylation (Protein N-term); Oxidation (M)	0	0	2140	0	0	0	0	0	0	0	0	0	0	0	0	0	0	0	0	0	0	0	0	0	0	0	0	0
EGSETTSASTT	1070.44	0.01	60	15.5	3.8			0	0	0	0	0	0	0	0	2140	0	0	0	0	0	0	0	0	0	0	0	0	0	0	0	0	0	0	0
AAGAGQ(+.98)PAGGVAAAGGVVSGPS	855.426	0.01	60	0	5.57		Deamidation (NQ)	0	0	0	0	0	0	0	2140	0	0	0	0	0	0	0	0	0	0	0	0	0	0	0	0	0	0	0	0
KPRAVHK	418.267	0.01	60	7.9	11.17			956	0	0	0	0	0	0	0	0	0	0	636	0	0	0	0	553	0	0	0	0	0	0	0	0	0	0	0
SDSTGA	537.211	0.02	60	4.9	3.8			0	0	0	0	0	0	0	0	0	890	0	1290	0	0	0	0	0	0	0	0	0	0	0	0	0	0	0	0
EGSTLSGCDIELVG	690.309	0.01	60	6.3	3.57			0	0	0	0	0	0	0	0	0	0	0	0	2180	0	0	0	0	0	0	0	0	0	0	0	0	0	0	0
SDDAGDYEQ(+.98)LFS	674.257	0.01	60	5.6	3.37		Deamidation (NQ)	0	0	0	0	0	0	1450	0	0	0	0	749	0	0	0	0	0	0	0	0	0	0	0	0	0	0	0	0
NATDSPKSS	906.415	0.03	60	7	5.84			0	0	0	0	0	0	0	0	0	0	0	0	2220	0	0	0	0	0	0	0	0	0	0	0	0	0	0	0
KEQVTNVGGAVVTGVT	779.926	0.03	60	4.7	6			0	0	0	0	0	0	0	0	0	0	0	0	0	0	0	0	2220	0	0	0	0	0	0	0	0	0	0	0
Q(+.98)VTCQ(+.98)HPEPLACPVQCVEGCH	1140.47	0.01	60	0	5.23		Deamidation (NQ)	2220	0	0	0	0	0	0	0	0	0	0	0	0	0	0	0	0	0	0	0	0	0	0	0	0	0	0	0
PVTVTRTTITTTTT	746.908	0.01	60	5.1	10.18			0	0	0	0	0	0	0	0	0	0	0	2230	0	0	0	0	0	0	0	0	0	0	0	0	0	0	0	0
NMQHIM(+15.99)GP	472.211	0.05	60	4.9	6.74		Oxidation (M)	2240	0	0	0	0	0	0	0	0	0	0	0	0	0	0	0	0	0	0	0	0	0	0	0	0	0	0	0
KTERELLESYIDGR	570.299	0.01	60	2.3	4.87			0	0	0	0	0	0	0	2240	0	0	0	0	0	0	0	0	0	0	0	0	0	0	0	0	0	0	0	0
GGPLAPGSRAS	485.258	0.01	60	0	9.75			2260	0	0	0	0	0	0	0	0	0	0	0	0	0	0	0	0	0	0	0	0	0	0	0	0	0	0	0
Q(-17.03)QSPLAQ(+.98)Q(+.98)SPL	591.284	0.01	60	0	5.52		Pyro-glu from Q; Deamidation (NQ)	0	0	0	2260	0	0	0	0	0	0	0	0	0	0	0	0	0	0	0	0	0	0	0	0	0	0	0	0
QARSKGFIQ(+.98)KRKFQEIKNST	599.593	0.01	60	3	11.17		Deamidation (NQ)	0	0	0	0	0	0	0	0	0	0	0	0	0	1360	900	0	0	0	0	0	0	0	0	0	0	0	0	0
FSGPPGKEGEPGPRGEIGPQ(+.98)GIM(+15.99)GQ(+.98)KGDQGERGPVGQP	951.442	0.04	60	9.2	5.01		Deamidation (NQ); Oxidation (M)	0	0	0	0	0	0	0	0	0	0	1310	0	960	0	0	0	0	0	0	0	0	0	0	0	0	0	0	0
LIADSIAEQ(+.98)ILA	629.343	0.01	60	0	3.67		Deamidation (NQ)	0	0	0	0	0	0	0	0	0	0	0	0	0	0	2280	0	0	0	0	0	0	0	0	0	0	0	0	0
VLVGKAAAT	415.255	0.02	60	8.6	8.72			0	0	0	279	0	0	0	0	0	0	0	2010	0	0	0	0	0	0	0	0	0	0	0	0	0	0	0	0
SEGHSEESDTQSVSGHGQ(+.98)A	965.374	0.03	60	6.9	4.39		Deamidation (NQ)	0	0	0	0	0	2290	0	0	0	0	0	0	0	0	0	0	0	0	0	0	0	0	0	0	0	0	0	0
AGGQMKGLLLKLLESAFG	917.022	0.01	60	2.7	8.64			0	0	0	0	0	0	2290	0	0	0	0	0	0	0	0	0	0	0	0	0	0	0	0	0	0	0	0	0
TCLLDSGHQ	973.441	0.01	60	0	5.05			0	0	0	0	0	0	0	2290	0	0	0	0	0	0	0	0	0	0	0	0	0	0	0	0	0	0	0	0
TGKIST	606.336	0.01	60	0	8.41			0	0	0	0	0	0	0	0	0	0	0	0	0	2300	0	0	0	0	0	0	0	0	0	0	0	0	0	0
SSTSYNRGDSTFESKSYKMADEAGSEADHEGTHSTKRGHAKSRPV	978.049	0.03	60	7.9	6.79	sp|P02671|FIBA_HUMAN		0	2330	0	0	0	0	0	0	0	0	0	0	0	0	0	0	0	0	0	0	0	0	0	0	0	0	0	0
QELVVKPIKVKRKKKKKKTEGGSRST	596.974	0.01	60	9.6	10.84			0	0	0	0	0	0	0	0	0	0	0	0	0	0	2330	0	0	0	0	0	0	0	0	0	0	0	0	0
QGPPGLMDAETDECM(+15.99)DYTGCSPGAMSSESST	793.308	0.01	60	8.8	3.29		Oxidation (M)	1520	0	0	0	0	0	0	831	0	0	0	0	0	0	0	0	0	0	0	0	0	0	0	0	0	0	0	0
KKEEGQ(+.98)LLSVEALPESTDSSLENLPLAPLYPS	691.957	0.01	60	2.7	4.14		Deamidation (NQ)	0	0	0	0	0	0	0	449	0	1130	0	0	0	0	786	0	0	0	0	0	0	0	0	0	0	0	0	0
LVNCSKK	791.452	0.02	60	6.8	9.31			0	0	0	0	0	0	0	2370	0	0	0	0	0	0	0	0	0	0	0	0	0	0	0	0	0	0	0	0
VMDDEIESEAKKES	537.247	0.01	60	0	4.08			0	0	0	0	0	2370	0	0	0	0	0	0	0	0	0	0	0	0	0	0	0	0	0	0	0	0	0	0
SGEGDFLAEGGG	548.237	0.01	60	0	3.57	sp|P02671|FIBA_HUMAN		0	0	0	0	0	0	0	0	0	0	0	0	0	0	2380	0	0	0	0	0	0	0	0	0	0	0	0	0
VIPAKIQQ(+.98)VA	534.328	0.01	60	7	8.72		Deamidation (NQ)	0	0	778	0	0	347	0	0	0	0	307	131	123	0	0	0	697	0	0	0	0	0	0	0	0	0	0	0
AWGAN(+.98)SYGQ	954.394	0.01	60	2	5.57		Deamidation (NQ)	0	0	0	0	0	0	0	0	0	0	0	0	0	0	963	1420	0	0	0	0	0	0	0	0	0	0	0	0
DDMTKNDPFKARVS	541.932	0.01	60	0	6.04	sp|Q15942|ZYX_HUMAN		0	0	0	0	0	0	0	0	0	0	0	0	0	0	0	0	2400	0	0	0	0	0	0	0	0	0	0	0
HSM(+15.99)HYGHDPPM(+15.99)HYSQ(+.98)TAGNVMSNEHFHPQHP	910.865	0.06	60	4.4	6.36		Oxidation (M); Deamidation (NQ)	0	0	0	0	0	0	2410	0	0	0	0	0	0	0	0	0	0	0	0	0	0	0	0	0	0	0	0	0
EQSGSSNGSESSPAN(+.98)ENGDRHLQQ(+.98)GSE	698.288	0.02	60	6.8	4.25		Deamidation (NQ)	0	0	0	0	0	0	0	2420	0	0	0	0	0	0	0	0	0	0	0	0	0	0	0	0	0	0	0	0
APPGK	469.273	0.02	60	2	8.8			0	0	0	2110	0	0	0	0	0	0	0	0	0	335	0	0	0	0	0	0	0	0	0	0	0	0	0	0
KKRAYQ	397.241	0.05	60	3.5	10.29			0	0	0	0	0	2460	0	0	0	0	0	0	0	0	0	0	0	0	0	0	0	0	0	0	0	0	0	0
SSSSSSSASCASSSSSSNSASAPSAACKSAGGGGAG	746.803	0.01	60	1.7	7.79			0	0	0	0	0	0	136	0	0	0	0	0	0	0	0	2330	0	0	0	0	0	0	0	0	0	0	0	0
TVEGPCEAQ(+.98)LECLDNGDGTCSVSYVPTE	584.24	0.01	60	2.3	3.34		Deamidation (NQ)	0	0	0	0	0	2470	0	0	0	0	0	0	0	0	0	0	0	0	0	0	0	0	0	0	0	0	0	0
ERELEEARKKLAQI	571.661	0.01	60	6.6	6.39			0	0	0	0	0	0	0	0	0	0	0	1630	0	0	0	852	0	0	0	0	0	0	0	0	0	0	0	0
QELAEELSTALP	650.823	0.01	60	0	3.67			0	0	0	0	0	0	0	0	0	0	0	0	0	0	0	0	2490	0	0	0	0	0	0	0	0	0	0	0
SSSYSKQFTSSTSYN(+.98)RGDSTFESKSYKM	798.609	0.01	60	2.9	9.3	sp|P02671|FIBA_HUMAN	Deamidation (NQ)	0	0	0	0	0	0	0	0	0	1150	0	0	0	1350	0	0	0	0	0	0	0	0	0	0	0	0	0	0
FVKVVKN	417.275	0.03	60	9.9	10			0	0	0	0	0	0	0	1020	0	395	509	0	0	0	0	588	0	0	0	0	0	0	0	0	0	0	0	0
PLLILIVLLGQ	596.402	0.02	60	14.6	5.96	sp|P05997|CO5A2_HUMAN		0	189	0	0	0	0	249	0	0	0	0	1620	0	0	470	0	0	0	0	0	0	0	0	0	0	0	0	0
MDGQT	551.215	0.02	60	1.6	3.8	sp|P22105|TENX_HUMAN		0	0	0	0	0	0	0	0	0	0	0	0	0	0	0	2530	0	0	0	0	0	0	0	0	0	0	0	0
KRKETLKN(+.98)VPFSELNLKKKKGKT	679.667	0.01	60	0	10.47		Deamidation (NQ)	0	0	0	0	0	0	2530	0	0	0	0	0	0	0	0	0	0	0	0	0	0	0	0	0	0	0	0	0
VCEQ(+.98)EPGGPAGS	377.824	0.01	60	5.3	3.79		Deamidation (NQ)	0	0	0	0	0	0	0	0	0	2540	0	0	0	0	0	0	0	0	0	0	0	0	0	0	0	0	0	0
LGLPGPPDVPDHAAYHPF	633.978	0.01	60	0	5.05			2540	0	0	0	0	0	0	0	0	0	0	0	0	0	0	0	0	0	0	0	0	0	0	0	0	0	0	0
EATEGPSTHQ	1056.45	0.01	60	1.3	4.51			0	0	0	0	0	0	0	0	0	680	0	1860	0	0	0	0	0	0	0	0	0	0	0	0	0	0	0	0
MQADDELLHPLGPDDKN	954.431	0.03	60	2.8	4.03			0	2550	0	0	0	0	0	0	0	0	0	0	0	0	0	0	0	0	0	0	0	0	0	0	0	0	0	0
AGGGSSC	538.183	0.01	60	0	5.56			2570	0	0	0	0	0	0	0	0	0	0	0	0	0	0	0	0	0	0	0	0	0	0	0	0	0	0	0
Q(+.98)CIPSTFQ(+.98)CDGDEDCKDGSDEEN(+.98)CSV	566.18	0.01	60	0	3.54		Deamidation (NQ)	0	0	2590	0	0	0	0	0	0	0	0	0	0	0	0	0	0	0	0	0	0	0	0	0	0	0	0	0
ETGQ(+.98)LGSLGGV	509.756	0.03	60	3.4	4		Deamidation (NQ)	0	0	0	0	0	0	409	0	0	0	940	0	0	1250	0	0	0	0	0	0	0	0	0	0	0	0	0	0
MADEAGSEADHEGTHST	582.228	0.12	60	4.2	4.17	sp|P02671|FIBA_HUMAN		0	502	0	431	259	823	0	621	0	0	0	0	0	0	0	0	0	0	0	0	0	0	0	0	0	0	0	0
PRGQKKK	421.277	0.01	60	6.5	11.27			0	0	0	0	0	2160	0	0	0	482	0	0	0	0	0	0	0	0	0	0	0	0	0	0	0	0	0	0
TFQKQ(+.98)GLAQ	511.274	0.01	60	8.2	8.41		Deamidation (NQ)	0	370	0	0	0	0	0	0	0	346	0	0	0	0	0	1930	0	0	0	0	0	0	0	0	0	0	0	0
FPQLGGRPGPEGEGSLESQPPPLQ	1237.61	0.03	60	9.5	4.25			0	0	0	0	0	0	0	0	0	0	0	0	0	0	0	0	2660	0	0	0	0	0	0	0	0	0	0	0
KAPPQVAVAAG	504.807	0.01	60	3	8.75			0	0	0	0	0	0	0	0	0	0	0	0	0	0	0	0	2660	0	0	0	0	0	0	0	0	0	0	0
FVSETESRGSESGIFTNTKESSSHHPGIAEFPS	885.415	0.02	60	4.4	4.98	sp|P02671|FIBA_HUMAN		0	0	0	0	0	0	0	2670	0	0	0	0	0	0	0	0	0	0	0	0	0	0	0	0	0	0	0	0
S(+42.01)GDGDSDQ(+.98)SRNR	668.76	0.01	60	0	4.43		Acetylation (Protein N-term); Deamidation (NQ)	2670	0	0	0	0	0	0	0	0	0	0	0	0	0	0	0	0	0	0	0	0	0	0	0	0	0	0	0
HVEAFKTGPEMQNILKKVAATLQVPVN(+.98)DLNA	1126.26	0.01	60	1.5	6.76		Deamidation (NQ)	0	0	0	0	0	0	0	0	2690	0	0	0	0	0	0	0	0	0	0	0	0	0	0	0	0	0	0	0
S(+42.01)ETAPAAPAAPAPAEKTPV	909.467	0.03	60	5.5	4.53		Acetylation (Protein N-term)	0	0	0	0	0	0	0	0	0	0	0	0	0	2700	0	0	0	0	0	0	0	0	0	0	0	0	0	0
TCCAN(+.98)CQT	844.245	0.02	60	5.7	5.18		Deamidation (NQ)	0	0	0	0	0	0	0	0	0	0	742	0	0	1970	0	0	0	0	0	0	0	0	0	0	0	0	0	0
RELWVCEGGGV	602.788	0.15	60	6.1	4.53			0	0	0	1190	0	0	493	0	0	593	444	0	0	0	0	0	0	0	0	0	0	0	0	0	0	0	0	0
ETATSGGCQ(+.98)PPGDSATGFHREG	721.62	0.01	60	3	4.65		Deamidation (NQ)	0	0	0	0	0	0	0	0	0	0	0	0	0	0	0	0	2720	0	0	0	0	0	0	0	0	0	0	0
GGGGGAGGGGGSSQAGGAPGPPSGGPGA	996.93	0.06	60	4.3	5.52			2730	0	0	0	0	0	0	0	0	0	0	0	0	0	0	0	0	0	0	0	0	0	0	0	0	0	0	0
KEAKSETSGPQIKELTDEEAERLQ	679.844	0.03	60	8.5	4.55			0	0	925	521	0	0	0	0	0	0	0	1290	0	0	0	0	0	0	0	0	0	0	0	0	0	0	0	0
KLKITKYLR	581.889	0.02	60	17.2	10.46			0	0	1910	0	828	0	0	0	0	0	0	0	0	0	0	0	0	0	0	0	0	0	0	0	0	0	0	0
Q(-17.03)TDNNPT	386.65	0.01	60	0	3.8		Pyro-glu from Q	0	0	0	0	0	0	0	0	0	0	0	2740	0	0	0	0	0	0	0	0	0	0	0	0	0	0	0	0
PGSGSESG	677.266	0.01	60	0	4			0	2740	0	0	0	0	0	0	0	0	0	0	0	0	0	0	0	0	0	0	0	0	0	0	0	0	0	0
A(+42.01)GSVADSDAVVKLDDGHLN(+.98)NSL	747.363	0.01	60	0	4.13		Acetylation (Protein N-term); Deamidation (NQ)	2740	0	0	0	0	0	0	0	0	0	0	0	0	0	0	0	0	0	0	0	0	0	0	0	0	0	0	0
KTKEGVLYVGSKTKEGVVHGVA	572.323	0.01	60	9.4	9.4			0	0	0	0	0	0	0	0	0	0	0	0	0	1520	1220	0	0	0	0	0	0	0	0	0	0	0	0	0
CIVKRTEKRLRKAIRTLRK	592.872	0.01	60	3.6	11.84			0	452	979	0	0	0	1310	0	0	0	0	0	0	0	0	0	0	0	0	0	0	0	0	0	0	0	0	0
AVADTRDQADGSRASVDSGSSEEQGGSSRALVSTLVPLG	958.965	0.03	60	12.5	4.23			0	2750	0	0	0	0	0	0	0	0	0	0	0	0	0	0	0	0	0	0	0	0	0	0	0	0	0	0
QSPLAQ(+.98)Q(+.98)SPL	535.764	0.06	60	2.9	5.52		Deamidation (NQ)	0	0	0	664	0	0	0	0	0	0	0	986	0	0	1120	0	0	0	0	0	0	0	0	0	0	0	0	0
AGDGEGSAEGAGGPSGEP	501.198	0.01	60	3.2	3.5			0	0	0	2770	0	0	0	0	0	0	0	0	0	0	0	0	0	0	0	0	0	0	0	0	0	0	0	0
RAVPPNNSNAAEDDLPTVE	1004.98	0.01	60	3.9	3.92			0	0	0	0	0	2770	0	0	0	0	0	0	0	0	0	0	0	0	0	0	0	0	0	0	0	0	0	0
MEEWGACYNAEN(+.98)I	765.787	0.06	60	5	3.67		Deamidation (NQ)	0	0	0	661	0	0	2110	0	0	0	0	0	0	0	0	0	0	0	0	0	0	0	0	0	0	0	0	0
TTSHDT	661.278	0.02	60	10.6	5.05			0	0	1040	0	0	0	0	0	0	0	0	0	0	1740	0	0	0	0	0	0	0	0	0	0	0	0	0	0
NGGDT	463.18	0.01	60	0	3.8			2780	0	0	0	0	0	0	0	0	0	0	0	0	0	0	0	0	0	0	0	0	0	0	0	0	0	0	0
GPEASFPGLP	971.479	0.01	60	0	4			0	0	0	0	2780	0	0	0	0	0	0	0	0	0	0	0	0	0	0	0	0	0	0	0	0	0	0	0
EDGLRGWFPASYVQ(+.98)	813.39	0.01	60	10	4.37		Deamidation (NQ)	0	0	1900	0	0	0	0	0	0	0	0	0	890	0	0	0	0	0	0	0	0	0	0	0	0	0	0	0
ATFAVGPGHGIQLQ	465.92	0.01	60	0	6.79			0	0	2790	0	0	0	0	0	0	0	0	0	0	0	0	0	0	0	0	0	0	0	0	0	0	0	0	0
GLVLGLLGPL	476.321	0.01	60	8	5.52			0	0	0	754	0	0	0	0	0	403	1640	0	0	0	0	0	0	0	0	0	0	0	0	0	0	0	0	0
SCQ(+.98)DEGCGLESEQSCSMWM(+15.99)EDSPS	661.225	0.02	60	0.9	3.34		Deamidation (NQ); Oxidation (M)	0	772	0	0	0	0	0	0	0	0	2030	0	0	0	0	0	0	0	0	0	0	0	0	0	0	0	0	0
KLSGLK	645.435	0.01	60	7.1	10			0	987	0	0	0	0	1170	0	0	0	0	0	646	0	0	0	0	0	0	0	0	0	0	0	0	0	0	0
GN(+.98)GQMFGN(+.98)WTFGT	709.773	0.01	60	6.5	5.52		Deamidation (NQ)	2440	0	0	0	0	0	0	0	0	381	0	0	0	0	0	0	0	0	0	0	0	0	0	0	0	0	0	0
AIQLTYN(+.98)PDESSKPNM(+15.99)IDAATL	1205.09	0.01	60	0	4.03		Deamidation (NQ); Oxidation (M)	2830	0	0	0	0	0	0	0	0	0	0	0	0	0	0	0	0	0	0	0	0	0	0	0	0	0	0	0
TFESKSYKMADEAGSEADHEGTHST	679.539	0.01	60	0	4.63	sp|P02671|FIBA_HUMAN		0	0	0	0	0	2830	0	0	0	0	0	0	0	0	0	0	0	0	0	0	0	0	0	0	0	0	0	0
QSQSINCNTCKQGISKTCMSEETSNQK	745.079	0.01	60	7.6	7.94			0	942	0	0	0	0	0	0	0	0	0	0	0	0	1890	0	0	0	0	0	0	0	0	0	0	0	0	0
DTDLEALFN(+.98)SVMN	490.559	0.03	60	7.1	3.49		Deamidation (NQ)	1870	0	0	387	0	0	0	0	0	0	0	0	0	0	593	0	0	0	0	0	0	0	0	0	0	0	0	0
KKSLEDKTERELLESYIDGR	603.074	0.01	60	0	5.06			0	0	0	0	0	0	0	2850	0	0	0	0	0	0	0	0	0	0	0	0	0	0	0	0	0	0	0	0
QDLSSCAGRCGEGYSRDATCNCDYNCQ(+.98)HY	644.843	0.01	60	6.1	4.66		Deamidation (NQ)	0	0	0	0	0	0	0	0	0	957	0	0	1900	0	0	0	0	0	0	0	0	0	0	0	0	0	0	0
SRSESCHTDGTYAYDADFSCCSSFN(+.98)G	937.665	0.01	60	10.2	4.22		Deamidation (NQ)	0	0	0	0	0	1210	0	389	0	0	0	0	0	0	0	0	1260	0	0	0	0	0	0	0	0	0	0	0
SESGSFRPDSPGSGNARPNNPDWGTF	912.736	0.02	60	9.3	4.56	sp|P02671|FIBA_HUMAN		0	0	0	0	0	0	0	2860	0	0	0	0	0	0	0	0	0	0	0	0	0	0	0	0	0	0	0	0
AMQNTKLLF	533.291	0.01	60	10.9	8.8			0	559	0	0	0	547	0	0	0	0	0	0	0	0	0	1760	0	0	0	0	0	0	0	0	0	0	0	0
WQCGEGFRQ(+.98)LDLLCD	892.394	0.01	60	5.7	4.03		Deamidation (NQ)	0	0	0	846	0	0	0	0	0	0	0	2030	0	0	0	0	0	0	0	0	0	0	0	0	0	0	0	0
AGGGGGSM(+15.99)GG	723.276	0.01	60	0	5.57		Oxidation (M)	0	0	0	0	0	0	0	0	0	0	0	0	0	0	0	0	2880	0	0	0	0	0	0	0	0	0	0	0
DPGPPGDQ(+.98)GPPGPDGPR	538.573	0.02	60	9.3	3.93		Deamidation (NQ)	0	0	0	0	0	0	0	978	1910	0	0	0	0	0	0	0	0	0	0	0	0	0	0	0	0	0	0	0
KDYEEVGIDSYEDEDEGEE	1125.44	0.06	60	5.4	3.48	sp|P68366|TBA4A_HUMAN		0	0	0	0	0	0	0	768	0	0	0	0	932	0	1190	0	0	0	0	0	0	0	0	0	0	0	0	0
Q(-17.03)AGAAGSRMNFRPG	468.226	0.01	60	0	12		Pyro-glu from Q	0	0	0	0	0	2890	0	0	0	0	0	0	0	0	0	0	0	0	0	0	0	0	0	0	0	0	0	0
DQPM(+15.99)ANLCTPSSTAN(+.98)SCSSSASNTPGAPETHPSSSPTPTSSN(+.98)TQEEAQPSSVSD	1077.26	0.01	60	4.8	3.83		Oxidation (M); Deamidation (NQ)	0	0	688	767	0	0	0	0	1450	0	0	0	0	0	0	0	0	0	0	0	0	0	0	0	0	0	0	0
ADEAGSEADHEGTHSTKRGHAKSRPV	546.863	0.06	60	2.5	6.29	sp|P02671|FIBA_HUMAN		0	235	984	0	0	1230	0	0	0	0	0	0	0	0	480	0	0	0	0	0	0	0	0	0	0	0	0	0
ALEDSSLAPGNTW	680.82	0.1	60	7.9	3.67	sp|Q9ULL8|SHRM4_HUMAN		1660	0	0	316	0	0	497	0	0	0	0	460	0	0	0	0	0	0	0	0	0	0	0	0	0	0	0	0
PLPPK	551.359	0.01	60	4.5	9.18			0	0	0	0	0	0	0	0	0	0	0	0	0	2300	0	0	638	0	0	0	0	0	0	0	0	0	0	0
N(+.98)SWSCKFVAAGGLQ(+.98)Q	799.366	0.01	60	9	8.22		Deamidation (NQ)	0	0	0	0	0	0	977	295	0	0	0	0	0	1670	0	0	0	0	0	0	0	0	0	0	0	0	0	0
E(-18.01)PKKIKK	426.791	0.01	60	7.6	10		Pyro-glu from E	0	0	0	0	0	1450	0	0	0	0	0	0	0	0	0	0	1500	0	0	0	0	0	0	0	0	0	0	0
Q(-17.03)TEEGEEN(+.98)PFIC	690.27	0.12	60	7.9	3.58		Pyro-glu from Q; Deamidation (NQ)	0	71.6	0	193	0	0	975	0	0	167	0	0	0	800	447	0	325	0	0	0	0	0	0	0	0	0	0	0
S(+42.01)GGCGSGCGGCGSGCGGCG	732.707	0.04	60	2.2	5.23	sp|Q6L8H1|KRA54_HUMAN	Acetylation (Protein N-term)	0	0	0	1450	0	0	0	0	0	0	0	0	1540	0	0	0	0	0	0	0	0	0	0	0	0	0	0	0
YLQGAKIPKPEAS	467.934	0.01	60	0	8.5			0	0	0	0	0	2990	0	0	0	0	0	0	0	0	0	0	0	0	0	0	0	0	0	0	0	0	0	0
KQPGPQ(+.98)LDA	477.747	0.01	60	0	5.84		Deamidation (NQ)	0	0	0	0	2990	0	0	0	0	0	0	0	0	0	0	0	0	0	0	0	0	0	0	0	0	0	0	0
E(-18.01)MN(+.98)FSLLVEDT	640.789	0.01	60	0	3.57		Pyro-glu from E; Deamidation (NQ)	0	0	0	3000	0	0	0	0	0	0	0	0	0	0	0	0	0	0	0	0	0	0	0	0	0	0	0	0
EEFPF	668.294	0.01	60	0	3.8			0	0	0	0	0	0	0	0	0	0	0	0	0	0	3010	0	0	0	0	0	0	0	0	0	0	0	0	0
TYAPVISAEKAYHEQ	569.617	0.06	60	6.8	5.37	sp|P68366|TBA4A_HUMAN		0	505	0	0	0	0	0	0	0	0	0	1510	0	1000	0	0	0	0	0	0	0	0	0	0	0	0	0	0
LVICIVVVVAILG	655.917	0.01	60	2.4	5.52			0	0	2570	0	0	0	0	0	0	0	0	0	448	0	0	0	0	0	0	0	0	0	0	0	0	0	0	0
DLVIGK	644.411	0.01	60	9.8	5.84			0	0	0	0	1390	0	0	0	0	0	0	0	1630	0	0	0	0	0	0	0	0	0	0	0	0	0	0	0
TM(+15.99)TPT	566.256	0.01	60	3.9	5.19		Oxidation (M)	0	0	0	0	0	0	0	3020	0	0	0	0	0	0	0	0	0	0	0	0	0	0	0	0	0	0	0	0
CDQ(+.98)AQGSCWCVMD	723.74	0.04	60	6	3.56		Deamidation (NQ)	0	0	0	0	0	0	0	0	0	479	0	1210	0	0	1360	0	0	0	0	0	0	0	0	0	0	0	0	0
FEKKSLEDKTERELLES	521.022	0.01	60	0	4.72			0	0	0	0	3050	0	0	0	0	0	0	0	0	0	0	0	0	0	0	0	0	0	0	0	0	0	0	0
SQ(+.98)VVAAASALAA	530.293	0.15	60	3.5	5.24		Deamidation (NQ)	867	0	0	633	0	0	1560	0	0	0	0	0	0	0	0	0	0	0	0	0	0	0	0	0	0	0	0	0
QGVSDQ(+.98)SFQVEEAKRI	911.47	0.01	60	0	4.68		Deamidation (NQ)	3060	0	0	0	0	0	0	0	0	0	0	0	0	0	0	0	0	0	0	0	0	0	0	0	0	0	0	0
KKAKKPAAAAGAKKAKSPKKAKAA	587.887	0.03	60	4.9	10.95			0	1130	0	0	0	0	0	0	0	0	0	1940	0	0	0	0	0	0	0	0	0	0	0	0	0	0	0	0
GLSEEM(+15.99)FQQQLAEKQLG	976.474	0.02	60	3.7	4.25		Oxidation (M)	0	0	0	0	0	0	3070	0	0	0	0	0	0	0	0	0	0	0	0	0	0	0	0	0	0	0	0	0
LVLAGVPSSSS	508.783	0.01	60	0	5.52			0	0	0	3090	0	0	0	0	0	0	0	0	0	0	0	0	0	0	0	0	0	0	0	0	0	0	0	0
R(+42.01)PDEEVFYCKVTNEIFRHYD	868.072	0.01	60	0	4.9		Acetylation (Protein N-term)	0	3090	0	0	0	0	0	0	0	0	0	0	0	0	0	0	0	0	0	0	0	0	0	0	0	0	0	0
TAGLGGKGGPY	489.256	0.01	60	0	8.26	sp|A3KMH1|VWA8_HUMAN		0	0	0	0	0	0	0	0	0	0	0	0	0	0	0	3110	0	0	0	0	0	0	0	0	0	0	0	0
LEKKLAIL	464.328	0.02	60	5.4	8.59			0	0	0	0	0	0	0	2270	0	0	0	0	841	0	0	0	0	0	0	0	0	0	0	0	0	0	0	0
AGPTN(+.98)YSNPVYAKLYM(+15.99)	452.23	0.01	60	4	8.47		Deamidation (NQ); Oxidation (M)	984	0	0	0	0	0	0	0	0	0	0	0	0	0	2130	0	0	0	0	0	0	0	0	0	0	0	0	0
TDVLDSLTTIPEL	708.872	0.06	60	3	3.49			0	0	0	0	0	0	0	0	0	557	611	839	0	0	344	0	766	0	0	0	0	0	0	0	0	0	0	0
LQPTHALSGDGEWSGASSDSEF	1139.5	0.04	60	13.7	3.91			1870	0	0	1250	0	0	0	0	0	0	0	0	0	0	0	0	0	0	0	0	0	0	0	0	0	0	0	0
GKEIVRLQKDLRMLRKEHQ(+.98)QELEILKK	840.742	0.01	60	2	9.82		Deamidation (NQ)	0	0	0	700	0	0	0	0	0	0	0	0	0	0	2430	0	0	0	0	0	0	0	0	0	0	0	0	0
E(-18.01)Q(+.98)CTQEDVSSEDEDEEMPEDTEDLDHYEMKEEEPAEGK	892.328	0.01	60	9	3.64		Pyro-glu from E; Deamidation (NQ)	0	0	0	0	0	0	0	0	0	0	0	0	0	0	0	3130	0	0	0	0	0	0	0	0	0	0	0	0
QEILESEEKGDPNKPSGFRSVKAPVT	711.366	0.01	60	7.4	5.01	sp|O00151|PDLI1_HUMAN		0	0	0	0	0	0	0	0	0	0	0	3130	0	0	0	0	0	0	0	0	0	0	0	0	0	0	0	0
VPARYRKEQ(+.98)TLLKQLPCIPLVENLLKDGTD	863.715	0.01	60	6.4	8.13		Deamidation (NQ)	0	0	0	0	0	0	0	2670	461	0	0	0	0	0	0	0	0	0	0	0	0	0	0	0	0	0	0	0
SSYSKQ(+.98)FTSSTSYNRGDSTFESKSY	949.082	0.05	60	3.4	8.1	sp|P02671|FIBA_HUMAN	Deamidation (NQ)	0	0	0	0	0	0	1340	0	0	0	0	1800	0	0	0	0	0	0	0	0	0	0	0	0	0	0	0	0
EEAPSLRPAPPPISGGGYRARPA	587.31	0.02	60	5.7	8.84	sp|P02675|FIBB_HUMAN		0	0	1330	0	0	0	0	0	0	0	0	0	0	1810	0	0	0	0	0	0	0	0	0	0	0	0	0	0
GYNCT	557.208	0.01	60	0	5.52			0	0	0	0	0	3140	0	0	0	0	0	0	0	0	0	0	0	0	0	0	0	0	0	0	0	0	0	0
Q(-17.03)LAQ(+.98)GGLAEVLLAAKEHRRPRETRVIAVLGKAGQ	905.768	0.01	60	2.4	10.83		Pyro-glu from Q; Deamidation (NQ)	0	0	0	0	0	0	0	3160	0	0	0	0	0	0	0	0	0	0	0	0	0	0	0	0	0	0	0	0
QDLDVEELGSAGTSARCPPQ(+.98)GTKGKGEDS	734.075	0.01	60	3.1	4.3		Deamidation (NQ)	0	0	0	0	0	0	1400	0	0	0	0	0	1770	0	0	0	0	0	0	0	0	0	0	0	0	0	0	0
GWDQEPAREQAGGGWRA	624.289	0.02	60	8	4.68			0	0	0	830	1940	0	0	0	0	0	0	0	0	410	0	0	0	0	0	0	0	0	0	0	0	0	0	0
RRVIVQ(+.98)PGKT	1154.71	0.05	60	7	12.01		Deamidation (NQ)	169	334	421	0	53.9	0	197	0	192	104	485	0	397	122	179	0	560	0	0	0	0	0	0	0	0	0	0	0
AGGCGHDECD	963.274	0.01	60	8.4	4.02			0	0	0	1830	0	0	0	0	0	0	0	0	1400	0	0	0	0	0	0	0	0	0	0	0	0	0	0	0
KKIFGL	353.233	0.01	60	0	10	sp|Q5T3J3|LRIF1_HUMAN		0	0	0	0	0	3240	0	0	0	0	0	0	0	0	0	0	0	0	0	0	0	0	0	0	0	0	0	0
DGDNDHEALGVGDN	476.519	0.01	60	0	3.71			0	0	0	0	0	0	0	0	0	0	0	0	0	0	3250	0	0	0	0	0	0	0	0	0	0	0	0	0
QAANIVRALEL	1197.74	0.01	60	7.7	6			1490	84.2	0	0	0	0	103	1190	0	306	81.7	0	0	0	0	0	0	0	0	0	0	0	0	0	0	0	0	0
LAEGGGVR	379.711	0.04	60	2.8	6	sp|P02671|FIBA_HUMAN		1810	0	0	1150	0	0	0	0	0	0	0	0	0	0	309	0	0	0	0	0	0	0	0	0	0	0	0	0
SVVPSPKVSDTVVEPYNATLSVH	1213.13	0.01	60	0	5.3			0	0	0	0	0	0	0	3270	0	0	0	0	0	0	0	0	0	0	0	0	0	0	0	0	0	0	0	0
GGGSSSGSSGGGGGSGSGSGG	486.187	0.01	60	0	5.52			0	0	0	3270	0	0	0	0	0	0	0	0	0	0	0	0	0	0	0	0	0	0	0	0	0	0	0	0
QN(+.98)CGEGVADPSYPVVPESTGPEKHQ(+.98)E	689.805	0.01	60	10.6	4.25		Deamidation (NQ)	0	0	0	0	0	0	0	0	1900	0	0	0	0	1370	0	0	0	0	0	0	0	0	0	0	0	0	0	0
Q(-17.03)LSEKEIQKKIEEERA	486.012	0.02	60	5.7	5.07		Pyro-glu from Q	0	0	1930	0	0	0	0	1360	0	0	0	0	0	0	0	0	0	0	0	0	0	0	0	0	0	0	0	0
DEAGSEADHEGTHST	514.868	0.07	60	2.8	4.17	sp|P02671|FIBA_HUMAN		0	0	1340	0	567	975	0	0	0	0	0	0	0	0	0	409	0	0	0	0	0	0	0	0	0	0	0	0
GQKQ(+.98)Q(+.98)LVDAFLKLAKQRSVCTWGKNKPGIGAVILKRAKALAGQ	1155.9	0.01	60	6.7	10.74	sp|Q9Y2M0|FAN1_HUMAN	Deamidation (NQ)	0	0	0	0	0	1690	0	0	0	235	0	811	557	0	0	0	0	0	0	0	0	0	0	0	0	0	0	0
SSTSN(+.98)SGN(+.98)ETSGS	608.722	0.11	60	9	4		Deamidation (NQ)	0	0	0	0	0	0	0	0	0	2530	0	0	0	778	0	0	0	0	0	0	0	0	0	0	0	0	0	0
QGICDLLTQTENRLIGHQEAFMIGDGTVELKKYQ(+.98)SKQ	1049.03	0.01	60	9.1	5.56		Deamidation (NQ)	0	0	0	0	0	0	0	0	0	247	0	3070	0	0	0	0	0	0	0	0	0	0	0	0	0	0	0	0
QQQ(+.98)QQ(+.98)QQQQQQQQQGSAGMAGGMAGHG	714.537	0.01	60	9.4	6.74		Deamidation (NQ)	3320	0	0	0	0	0	0	0	0	0	0	0	0	0	0	0	0	0	0	0	0	0	0	0	0	0	0	0
HGGVCAPA	711.319	0.02	60	5	6.73			0	0	0	0	0	0	0	0	0	0	1670	1660	0	0	0	0	0	0	0	0	0	0	0	0	0	0	0	0
HSAKEM(+15.99)EHSVGVQMRSAMPMVPCQGPTCQ(+.98)GQ	840.369	0.01	60	5.4	6.91		Oxidation (M); Deamidation (NQ)	0	0	0	0	0	0	0	0	0	0	0	0	0	0	3360	0	0	0	0	0	0	0	0	0	0	0	0	0
Q(-17.03)DLLGAPVLLFLHPEDRPLM(+15.99)LAIHKKILQ(+.98)LAGQ	922.769	0.02	60	4.2	6.92		Pyro-glu from Q; Oxidation (M); Deamidation (NQ)	0	0	0	0	0	0	860	0	0	0	0	0	2550	0	0	0	0	0	0	0	0	0	0	0	0	0	0	0
IEGSHLNAGSDVAVSVGGR	912.955	0.01	60	0.1	5.32			0	1030	0	2380	0	0	0	0	0	0	0	0	0	0	0	0	0	0	0	0	0	0	0	0	0	0	0	0
NDNEEGFFS	529.704	0.02	60	2.8	3.57	sp|P02675|FIBB_HUMAN		0	0	0	0	0	0	0	0	0	0	0	0	0	0	0	0	3430	0	0	0	0	0	0	0	0	0	0	0
IHGIALLSEL	533.316	0.01	60	21.1	5.24			0	554	0	0	0	2880	0	0	0	0	0	0	0	0	0	0	0	0	0	0	0	0	0	0	0	0	0	0
EKVDVGKDQEFTVKSKGAGGQGKVASKIVGPSG	822.692	0.01	60	18.7	9.31			0	0	0	0	0	0	0	1280	0	0	0	2160	0	0	0	0	0	0	0	0	0	0	0	0	0	0	0	0
VCWDSQ(+.98)PGDEAQ(+.98)PQ(+.98)	781.791	0.01	60	0	3.49		Deamidation (NQ)	0	0	0	3440	0	0	0	0	0	0	0	0	0	0	0	0	0	0	0	0	0	0	0	0	0	0	0	0
Q(-17.03)IFLPEPEQP	590.794	0.09	60	10.9	3.79		Pyro-glu from Q	0	0	0	0	918	0	0	0	0	0	378	742	0	0	0	0	1420	0	0	0	0	0	0	0	0	0	0	0
A(+42.01)AREELYSKVTPRRN	458.748	0.03	60	3.3	9.98		Acetylation (Protein N-term)	0	0	0	0	0	0	0	0	0	0	0	2330	0	0	1130	0	0	0	0	0	0	0	0	0	0	0	0	0
TATQ(+.98)GAWQ(+.98)SSESSQ(+.98)ANLGEQAQSGPQG	903.39	0.02	60	6.1	3.79		Deamidation (NQ)	0	0	0	0	0	0	0	0	0	0	0	0	0	3460	0	0	0	0	0	0	0	0	0	0	0	0	0	0
ECCCCCCEECIQ	456.789	0.01	60	2.6	3.67			0	0	0	0	0	0	0	1780	0	0	0	0	0	1720	0	0	0	0	0	0	0	0	0	0	0	0	0	0
E(-18.01)GGCGACT	679.216	0.03	60	3.1	4		Pyro-glu from E	0	1610	0	0	0	0	0	0	0	0	0	0	0	0	1900	0	0	0	0	0	0	0	0	0	0	0	0	0
SSVSPPQIISSTIKTHVSNKYGTDFICSSLLT	853.457	0.01	60	13.2	7.93			2290	0	0	0	0	0	1220	0	0	0	0	0	0	0	0	0	0	0	0	0	0	0	0	0	0	0	0	0
Q(-17.03)HKCGNMSEAFREAGIQP	497.231	0.01	60	6.4	6.75		Pyro-glu from Q	0	0	0	0	0	0	0	0	0	0	0	2260	0	0	0	1250	0	0	0	0	0	0	0	0	0	0	0	0
EEQGLVKN(+.98)TEQSRRKKRKKISGPN(+.98)PLSCLKKKK	960.334	0.01	60	8.5	10.53		Deamidation (NQ)	0	0	0	0	0	0	0	0	0	3080	445	0	0	0	0	0	0	0	0	0	0	0	0	0	0	0	0	0
E(-18.01)QSVIIEQ(+.98)LRKKLRQ(+.98)AKLELRVAVAK	1010.96	0.01	60	12.9	10.43		Pyro-glu from E; Deamidation (NQ)	634	0	0	0	1430	26.6	0	18.5	0	0	1020	0	0	0	0	0	420	0	0	0	0	0	0	0	0	0	0	0
KMADEAGSEADHEGTHSTKRGHA	606.273	0.01	60	4.2	5.78	sp|P02671|FIBA_HUMAN		0	0	2740	0	0	0	0	811	0	0	0	0	0	0	0	0	0	0	0	0	0	0	0	0	0	0	0	0
KGTDAAQ(+.98)AAQ(+.98)YMAM(+15.99)EKAT	635.284	0.01	60	5.2	6.07		Deamidation (NQ); Oxidation (M)	0	0	1400	0	1300	0	0	852	0	0	0	0	0	0	0	0	0	0	0	0	0	0	0	0	0	0	0	0
PGEN(+.98)GFPGQMGIR	680.819	0.18	60	3.5	6.43		Deamidation (NQ)	1380	0	0	363	0	0	573	0	0	0	332	525	0	0	385	0	0	0	0	0	0	0	0	0	0	0	0	0
TTKKK	605.4	0.04	60	0.7	10.3			0	0	0	0	0	0	3090	0	470	0	0	0	0	0	0	0	0	0	0	0	0	0	0	0	0	0	0	0
GCICQPGY	840.325	0.01	60	10.7	5.51			2180	716	0	715	0	0	0	0	0	0	0	0	0	0	0	0	0	0	0	0	0	0	0	0	0	0	0	0
TAFGGRRAVPPNNSNAAEDDLPTVELQ	947.136	0.01	60	0	4.32			0	0	0	0	0	0	0	0	3620	0	0	0	0	0	0	0	0	0	0	0	0	0	0	0	0	0	0	0
KAKCGPKLKRLSLKGK	878.068	0.01	60	2.6	10.69			0	444	0	0	0	0	0	3210	0	0	0	0	0	0	0	0	0	0	0	0	0	0	0	0	0	0	0	0
ADEAGSEADHEGTHST	807.332	0.01	60	1.4	4.17	sp|P02671|FIBA_HUMAN		0	0	0	0	0	0	0	0	0	0	0	0	0	0	0	3690	0	0	0	0	0	0	0	0	0	0	0	0
KQFTSSTSYNRGDSTFESKS	565.016	0.01	60	3.6	8.5	sp|P02671|FIBA_HUMAN		3690	0	0	0	0	0	0	0	0	0	0	0	0	0	0	0	0	0	0	0	0	0	0	0	0	0	0	0
SQVRYKEEFEKNKGKGFSVVADTPELQ	779.149	0.01	60	7.1	6.04			0	0	0	0	0	0	0	0	1710	902	1100	0	0	0	0	0	0	0	0	0	0	0	0	0	0	0	0	0
QKVSGNQ(+.98)QIVGQPQ(+.98)I	813.417	0.01	60	0	8.75		Deamidation (NQ)	0	0	0	0	3720	0	0	0	0	0	0	0	0	0	0	0	0	0	0	0	0	0	0	0	0	0	0	0
Q(+.98)VSEVTAQPPPEEEEDQNEDQDVPDLT	1013.76	0.02	60	0	3.14		Deamidation (NQ)	0	0	0	0	0	0	0	0	0	0	0	0	0	0	3740	0	0	0	0	0	0	0	0	0	0	0	0	0
KKEDEIKQ(+.98)WLGKVSPEDVEYFN(+.98)CQQ(+.98)ELASELNKQ	811.982	0.01	60	0	4.6		Deamidation (NQ)	0	0	0	0	0	0	0	0	0	0	0	0	0	0	0	3750	0	0	0	0	0	0	0	0	0	0	0	0
HLSQDTGSPSGMRPWEDLPSQ(+.98)DTGSPS	957.43	0.01	60	0	4.22		Deamidation (NQ)	0	0	3750	0	0	0	0	0	0	0	0	0	0	0	0	0	0	0	0	0	0	0	0	0	0	0	0	0
QQ(+.98)LAVAMGPNIKQHVKNLGIPIITV	895.219	0.01	60	11.2	10		Deamidation (NQ)	0	0	715	0	0	0	0	1690	0	0	0	0	1350	0	0	0	0	0	0	0	0	0	0	0	0	0	0	0
DTN(+.98)GDSGGQ(+.98)CV	527.691	0.08	60	3	3.56		Deamidation (NQ)	1640	0	0	0	0	0	0	0	0	0	0	0	1120	0	1020	0	0	0	0	0	0	0	0	0	0	0	0	0
PPAAAAAGPPAT	496.265	0.02	60	6.4	5.96			0	1260	0	0	1810	0	0	0	0	0	0	0	720	0	0	0	0	0	0	0	0	0	0	0	0	0	0	0
LPGPQGPIGPPGEKGPQGKPGLAGLPGA	848.795	0.01	60	7.8	8.59			0	0	0	0	0	0	0	0	0	0	0	1430	0	0	0	0	2360	0	0	0	0	0	0	0	0	0	0	0
E(-18.01)AASVSSADTGLCSEACLF	461.454	0.03	60	6.5	3.57		Pyro-glu from E	2380	0	0	0	0	0	0	1420	0	0	0	0	0	0	0	0	0	0	0	0	0	0	0	0	0	0	0	0
YECVAS	671.273	0.01	60	0	4			0	0	0	0	0	3800	0	0	0	0	0	0	0	0	0	0	0	0	0	0	0	0	0	0	0	0	0	0
DAPTT	504.23	0.01	60	0	3.8			3830	0	0	0	0	0	0	0	0	0	0	0	0	0	0	0	0	0	0	0	0	0	0	0	0	0	0	0
FLKKSVVA	446.293	0.03	60	5.6	10			0	247	503	0	0	504	0	904	443	0	609	0	0	0	627	0	0	0	0	0	0	0	0	0	0	0	0	0
HAPPPPAPHQPPAASRSMFVALLGLGLGQ	729.409	0.01	60	10.5	9.76			0	0	1810	0	0	0	1700	0	0	0	347	0	0	0	0	0	0	0	0	0	0	0	0	0	0	0	0	0
CEARNVFGKVQAEARLIVTGHAPPQ(+.98)IASSAPT	830.67	0.01	60	2.4	8.23		Deamidation (NQ)	0	0	0	0	0	0	0	0	0	3860	0	0	0	0	0	0	0	0	0	0	0	0	0	0	0	0	0	0
EMPSEEGYQDYEPEA	887.345	0.02	60	10.4	3.4			1790	0	0	0	0	0	0	1250	825	0	0	0	0	0	0	0	0	0	0	0	0	0	0	0	0	0	0	0
VGGIAQIIAAQEE	649.841	0.01	60	0	3.79			0	0	0	0	0	0	0	0	0	0	0	3870	0	0	0	0	0	0	0	0	0	0	0	0	0	0	0	0
KHQKK	668.422	0.01	60	4.4	10.3			0	0	0	0	0	0	0	2430	1190	253	0	0	0	0	0	0	0	0	0	0	0	0	0	0	0	0	0	0
QGNSASGN(+.98)HFSGHGMSFN(+.98)APFSGAPNGNQ(+.98)MSCGQ	1129.11	0.01	60	12.3	6.91	sp|Q14686|NCOA6_HUMAN	Deamidation (NQ)	0	0	0	0	0	0	0	0	0	0	0	0	0	0	0	0	3880	0	0	0	0	0	0	0	0	0	0	0
DN(+.98)EEGFF	858.31	0.01	60	11.4	3.57	sp|P02675|FIBB_HUMAN	Deamidation (NQ)	0	0	0	0	3890	0	0	0	0	0	0	0	0	0	0	0	0	0	0	0	0	0	0	0	0	0	0	0
VPARYRKEQ(+.98)TLLKQ(+.98)LPCIPLVENLLKDGTD	863.993	0.01	60	6.4	8.13		Deamidation (NQ)	0	0	0	0	0	3300	0	0	0	600	0	0	0	0	0	0	0	0	0	0	0	0	0	0	0	0	0	0
SNSSGCGRPQ(+.98)N(+.98)ASSSCQ(+.98)SHRFGGQ	1221.49	0.06	60	3.1	9.01		Deamidation (NQ)	0	0	0	0	0	0	0	0	0	0	0	0	0	1520	2390	0	0	0	0	0	0	0	0	0	0	0	0	0
Q(-17.03)PPTVVPGGDLAKVQR	822.954	0.01	60	0	8.75	sp|P68366|TBA4A_HUMAN	Pyro-glu from Q	0	0	0	0	0	0	0	0	0	0	0	0	0	0	0	0	3910	0	0	0	0	0	0	0	0	0	0	0
KERLKQ(+.98)KHKKRPESPPSILTPPVVPTADK	661.996	0.01	60	17.9	10.29		Deamidation (NQ)	2690	0	0	0	0	0	0	1240	0	0	0	0	0	0	0	0	0	0	0	0	0	0	0	0	0	0	0	0
FGIYKRIKPL	617.903	0.01	60	0.2	10.29			0	0	0	0	0	0	0	1910	0	0	0	0	0	0	2030	0	0	0	0	0	0	0	0	0	0	0	0	0
GPCGSP	517.206	0.04	60	3.5	5.52			0	0	0	0	0	0	0	572	0	0	0	0	0	0	0	3370	0	0	0	0	0	0	0	0	0	0	0	0
SM(+15.99)GGGGGHRPHEGPGGGISGGSGHRPHEGPGGGMGAGG	1111.48	0.02	60	10.4	6.87		Oxidation (M)	0	0	3220	0	0	0	0	723	0	0	0	0	0	0	0	0	0	0	0	0	0	0	0	0	0	0	0	0
HVQPQPQPKPQVQLHVQSQTQPVS	679.608	0.03	60	11.7	8.76	sp|Q15942|ZYX_HUMAN		0	0	0	0	0	0	0	0	0	1180	0	1010	293	0	0	0	1470	0	0	0	0	0	0	0	0	0	0	0
KPGTPIILKGKNLIPPVAGGN	1042.62	0.01	60	11	10.3			484	0	0	1930	0	575	226	0	0	0	652	0	0	0	86.2	0	0	0	0	0	0	0	0	0	0	0	0	0
FSLQ(+.98)SSQGSSVDAGCGTG	563.573	0.04	60	1.9	3.8		Deamidation (NQ)	0	0	0	0	0	0	0	0	0	0	0	3130	827	0	0	0	0	0	0	0	0	0	0	0	0	0	0	0
PSADGDADNCC	1067.36	0.01	60	5.3	3.42			0	0	0	1880	0	0	0	0	0	2080	0	0	0	0	0	0	0	0	0	0	0	0	0	0	0	0	0	0
APACPGKVHELWGEWGQ	932.937	0.06	60	4.8	5.4			0	0	0	0	0	0	0	0	0	0	0	0	0	2260	0	0	1710	0	0	0	0	0	0	0	0	0	0	0
GASDGGGGV	676.283	0.03	60	6.5	3.8			0	0	0	0	0	0	0	0	0	0	0	0	0	0	3970	0	0	0	0	0	0	0	0	0	0	0	0	0
PN(+.98)YAN(+.98)GN(+.98)EKDSSKGPQSSS	985.42	0.04	60	12.8	6.48		Deamidation (NQ)	0	0	0	2880	0	0	0	0	0	0	0	0	0	0	1110	0	0	0	0	0	0	0	0	0	0	0	0	0
RGRPKGRG	883.556	0.01	60	3.9	12.3			1070	0	1520	0	0	0	0	0	1400	0	0	0	0	0	0	0	0	0	0	0	0	0	0	0	0	0	0	0
PPVEV	540.299	0.03	60	5.5	4			0	0	0	0	0	0	2500	1530	0	0	0	0	0	0	0	0	0	0	0	0	0	0	0	0	0	0	0	0
SSGVKSTHQAAIVSKIDSRLE	554.052	0.01	60	0.9	8.33			0	0	0	0	0	0	0	0	0	0	0	0	0	0	1530	2500	0	0	0	0	0	0	0	0	0	0	0	0
QGGLGSQ(+.98)VSALPPNSLVRKVKRTLPSPP	962.199	0.01	60	1.5	12.02		Deamidation (NQ)	0	0	0	0	0	0	0	0	1060	0	0	0	0	0	0	0	2970	0	0	0	0	0	0	0	0	0	0	0
GGGGGGGGGGGGGGGGV	515.719	0.05	60	3.2	5.52			1610	0	0	0	0	0	1190	0	0	0	377	0	0	0	865	0	0	0	0	0	0	0	0	0	0	0	0	0
PGPM(+15.99)GPPGLAGPPGESGREGAPGAEGS	481.219	0.02	60	7.8	4.25		Oxidation (M)	0	0	2340	0	1710	0	0	0	0	0	0	0	0	0	0	0	0	0	0	0	0	0	0	0	0	0	0	0
QEKTESLIQ(+.98)Q(+.98)YEAISLLN(+.98)SE	776.039	0.01	60	0	4.09	sp|Q9UPN3|MACF1_HUMAN	Deamidation (NQ)	4080	0	0	0	0	0	0	0	0	0	0	0	0	0	0	0	0	0	0	0	0	0	0	0	0	0	0	0
S(+42.01)GSGGGGSGGGGGGGSSG	413.166	0.02	60	4.1	5.24		Acetylation (Protein N-term)	0	0	0	4090	0	0	0	0	0	0	0	0	0	0	0	0	0	0	0	0	0	0	0	0	0	0	0	0
IDKKYAGFIHMKAVAGMKMS	557.301	0.05	60	6.7	9.83			0	0	0	0	0	0	0	0	0	732	0	1200	0	1490	0	680	0	0	0	0	0	0	0	0	0	0	0	0
ISLGLTLRLWDVYLVEGEQALM(+15.99)PITRIAFKVQQKRLT	1079.6	0.02	60	18.3	9.69		Oxidation (M)	0	0	0	0	0	0	0	0	0	0	0	0	0	0	4120	0	0	0	0	0	0	0	0	0	0	0	0	0
KKAKVAPPAK	519.341	0.01	60	2.5	10.48			0	1650	0	0	0	0	0	2470	0	0	0	0	0	0	0	0	0	0	0	0	0	0	0	0	0	0	0	0
VSSHGE	615.264	0.01	60	0	5.24			0	0	0	4120	0	0	0	0	0	0	0	0	0	0	0	0	0	0	0	0	0	0	0	0	0	0	0	0
DDETEEGAGDM(+15.99)SQ	467.168	0.02	60	7.6	3.29		Oxidation (M)	1190	0	427	0	2520	0	0	0	0	0	0	0	0	0	0	0	0	0	0	0	0	0	0	0	0	0	0	0
QPCSCNSN(+.98)GQ(+.98)LGSCHPLTGDCINQ(+.98)EPK	709.056	0.01	60	10.7	5.32		Deamidation (NQ)	0	0	0	0	0	0	0	0	240	239	1320	0	1680	0	0	675	0	0	0	0	0	0	0	0	0	0	0	0
KRLLQLPQ	498.323	0.01	60	0.7	11			4170	0	0	0	0	0	0	0	0	0	0	0	0	0	0	0	0	0	0	0	0	0	0	0	0	0	0	0
VFTLLRLLVVA	622.41	0.02	60	7	9.72			0	999	0	108	0	0	0	846	561	0	783	0	0	0	879	0	0	0	0	0	0	0	0	0	0	0	0	0
TAPSGQNENERCGT	732.309	0.04	60	5.3	4.53			1400	0	0	0	0	0	1090	0	0	38	693	0	0	0	956	0	0	0	0	0	0	0	0	0	0	0	0	0
SFSIGAGSKTPGARQRLQARRQHTRKK	756.439	0.05	60	3.1	12.61			1260	0	0	0	0	0	0	0	813	459	0	0	0	1660	0	0	0	0	0	0	0	0	0	0	0	0	0	0
APGVT	444.231	0.04	60	9.2	5.57			0	0	1240	0	0	0	0	0	0	0	2970	0	0	0	0	0	0	0	0	0	0	0	0	0	0	0	0	0
KYGCNFN(+.98)N(+.98)GGCHQ(+.98)DC	831.78	0.03	60	2.4	6.72		Deamidation (NQ)	819	0	0	0	2670	0	0	726	0	0	0	0	0	0	0	0	0	0	0	0	0	0	0	0	0	0	0	0
QELWQEEEQ	406.845	0.04	60	3.1	3.58			0	0	0	0	0	0	0	0	0	0	385	2820	0	0	1030	0	0	0	0	0	0	0	0	0	0	0	0	0
KEMATQLAFMRLLANYASQ(+.98)N(+.98)	576.275	0.01	60	11.5	8.59		Deamidation (NQ)	0	0	0	0	835	3400	0	0	0	0	0	0	0	0	0	0	0	0	0	0	0	0	0	0	0	0	0	0
AGPGD	416.181	0.01	60	16.9	3.8			0	0	2340	0	0	0	1910	0	0	0	0	0	0	0	0	0	0	0	0	0	0	0	0	0	0	0	0	0
QYGALETRGGFNPRVERTLLDARR	925.843	0.01	60	6.8	10.61			0	0	0	0	0	0	0	0	2390	0	0	0	1860	0	0	0	0	0	0	0	0	0	0	0	0	0	0	0
NNSEEEEDDDDEE	523.5	0.01	60	3.9	3.14			0	0	0	3070	0	0	1190	0	0	0	0	0	0	0	0	0	0	0	0	0	0	0	0	0	0	0	0	0
ACSGGAPGAG	747.305	0.01	60	0.6	5.56			0	0	0	0	0	0	0	0	0	0	0	0	0	0	0	0	4310	0	0	0	0	0	0	0	0	0	0	0
EEVSGNVSPGTRREYHTEKLVTS	644.572	0.03	60	4	5.57	sp|P02671|FIBA_HUMAN		2780	525	0	0	0	0	0	0	0	0	0	0	1020	0	0	0	0	0	0	0	0	0	0	0	0	0	0	0
AGQDGGGGGGADEDDDGEDGDEGEEEEEACPEP	1065.36	0.02	60	7.2	2.95			1340	0	0	0	0	0	0	0	0	0	0	0	797	0	2200	0	0	0	0	0	0	0	0	0	0	0	0	0
M(+15.99)DECQDGM(+15.99)F	554.168	0.1	60	9.5	3.49		Oxidation (M)	516	0	0	0	0	0	0	0	0	0	0	761	0	561	0	2520	0	0	0	0	0	0	0	0	0	0	0	0
ATSEYQTFFNPR	730.84	0.05	60	8.7	6.05			0	0	0	0	0	0	0	0	0	0	0	4360	0	0	0	0	0	0	0	0	0	0	0	0	0	0	0	0
QSSGFGQ(+.98)HGTGSGQSSGFGQYESRSRQSSYGQ(+.98)HGSGSSQSSGYGQHGSN(+.98)SGQTS	1081.65	0.01	60	0	8.52		Deamidation (NQ)	0	0	0	4360	0	0	0	0	0	0	0	0	0	0	0	0	0	0	0	0	0	0	0	0	0	0	0	0
HGLTPLLLGVHEQKQ(+.98)QVVKFLIKKKA	985.267	0.01	60	7.7	10.18		Deamidation (NQ)	0	0	305	0	0	298	0	1770	768	53.1	0	0	440	0	0	743	0	0	0	0	0	0	0	0	0	0	0	0
HLSQDTGSPSGM(+15.99)RPWEDLPSQDTGSPS	962.425	0.03	60	5.4	4.22		Oxidation (M)	0	0	0	0	0	0	0	3120	1260	0	0	0	0	0	0	0	0	0	0	0	0	0	0	0	0	0	0	0
MAVSNALFAK	526.275	0.01	60	0	8.5			0	0	0	0	0	0	0	0	0	0	0	4390	0	0	0	0	0	0	0	0	0	0	0	0	0	0	0	0
QASAERDELASRCRVVSEQ(+.98)LQA	816.409	0.01	60	4.3	4.87		Deamidation (NQ)	0	0	0	0	0	0	0	0	0	0	0	2750	1640	0	0	0	0	0	0	0	0	0	0	0	0	0	0	0
PYQQGM(+15.99)SM(+15.99)PDV	642.749	0.01	60	0	3.8		Oxidation (M)	0	0	0	0	0	0	0	0	0	0	0	0	0	0	4400	0	0	0	0	0	0	0	0	0	0	0	0	0
SSVKKIIKQ	515.84	0.01	60	5.9	10.3			4410	0	0	0	0	0	0	0	0	0	0	0	0	0	0	0	0	0	0	0	0	0	0	0	0	0	0	0
FWVDPCYVLTTSENSVHVYM	797.373	0.01	60	10.5	4.35			0	0	0	0	0	0	0	0	0	0	0	0	0	0	0	0	4410	0	0	0	0	0	0	0	0	0	0	0
LLSCNTPSSATMSLLAVK	918.479	0.02	60	8.7	8.22			2470	0	0	0	0	0	0	0	0	0	946	0	0	0	1030	0	0	0	0	0	0	0	0	0	0	0	0	0
M(+15.99)SCDSRAPAAACPAGQV	550.907	0.04	60	4.9	5.58		Oxidation (M)	0	0	892	0	0	2600	0	0	0	0	0	0	0	0	0	964	0	0	0	0	0	0	0	0	0	0	0	0
KIKSDANIAGFSLPGPKAD	643.683	0.02	60	2.5	8.5			0	0	1350	0	0	3130	0	0	0	0	0	0	0	0	0	0	0	0	0	0	0	0	0	0	0	0	0	0
NGM(+15.99)APSPSQSESAGSVSEGEEMDTAEIAR	980.746	0.02	60	2.3	3.83		Oxidation (M)	3100	0	0	1380	0	0	0	0	0	0	0	0	0	0	0	0	0	0	0	0	0	0	0	0	0	0	0	0
ATKVV	517.323	0.01	60	7	8.8			0	0	0	0	0	0	1910	0	1910	660	0	0	0	0	0	0	0	0	0	0	0	0	0	0	0	0	0	0
Q(-17.03)SPGKCGK	394.188	0.02	60	5.4	9.31		Pyro-glu from Q	0	0	0	0	0	3670	0	0	0	841	0	0	0	0	0	0	0	0	0	0	0	0	0	0	0	0	0	0
EEYPDRIMNSF	700.806	0.01	60	15.7	4.14			0	1510	0	0	0	0	0	0	0	0	0	0	0	0	3010	0	0	0	0	0	0	0	0	0	0	0	0	0
ATASPRSLLVLLQ(+.98)VVVLALAQIRGPP	895.22	0.02	60	9.7	12		Deamidation (NQ)	0	0	0	0	0	0	0	0	0	0	131	0	64.2	2470	983	0	886	0	0	0	0	0	0	0	0	0	0	0
GLPGPPDVPDHA	586.296	0.01	60	6.5	4.2			0	0	2220	0	0	0	0	0	0	0	0	0	0	0	0	0	2320	0	0	0	0	0	0	0	0	0	0	0
DEGTYMCIAENRVG	779.317	0.04	60	11.1	4.14			2790	0	0	0	0	0	1760	0	0	0	0	0	0	0	0	0	0	0	0	0	0	0	0	0	0	0	0	0
TQEKN(+.98)PLPSKETIEQEKQAGES	824.745	0.01	60	0	4.65	sp|P62328|TYB4_HUMAN	Deamidation (NQ)	0	0	0	0	0	0	0	4570	0	0	0	0	0	0	0	0	0	0	0	0	0	0	0	0	0	0	0	0
ELKKVC	360.204	0.01	60	0	8.29			0	0	0	0	4580	0	0	0	0	0	0	0	0	0	0	0	0	0	0	0	0	0	0	0	0	0	0	0
YFKVSPKPK	547.333	0.05	60	8.7	10			0	1740	0	0	0	0	0	0	0	0	0	1610	0	0	1250	0	0	0	0	0	0	0	0	0	0	0	0	0
TRGAEQ(+.98)LAEGGR	623.319	0.11	60	7	5.81		Deamidation (NQ)	1600	0	0	0	0	0	0	0	0	534	717	1330	0	422	0	0	0	0	0	0	0	0	0	0	0	0	0	0
N(+.98)ASADGNIGTIEDGSDSENIQ(+.98)AN(+.98)GIPGT	907.387	0.01	60	8.9	3.33		Deamidation (NQ)	213	0	0	0	0	0	0	0	1740	0	0	0	0	2700	0	0	0	0	0	0	0	0	0	0	0	0	0	0
SSRIGEIKEETTVSPPHTSM(+15.99)APAQ(+.98)DEERDSGK	872.39	0.04	60	4.4	4.75		Oxidation (M); Deamidation (NQ)	0	0	0	0	0	0	0	2720	0	0	0	0	1940	0	0	0	0	0	0	0	0	0	0	0	0	0	0	0
LNPNVDPQVLEAT	705.372	0.01	60	7.6	3.67			0	0	4670	0	0	0	0	0	0	0	0	0	0	0	0	0	0	0	0	0	0	0	0	0	0	0	0	0
IHWESASLL	528.278	0.01	60	0	5.24	sp|P01024|CO3_HUMAN		4710	0	0	0	0	0	0	0	0	0	0	0	0	0	0	0	0	0	0	0	0	0	0	0	0	0	0	0
SLGSLQQ(+.98)RDGAKAEVGDQVLVAG	767.061	0.03	60	0.9	4.56		Deamidation (NQ)	4730	0	0	0	0	0	0	0	0	0	0	0	0	0	0	0	0	0	0	0	0	0	0	0	0	0	0	0
KFSPGAPGGSGSQPN(+.98)QKLGHPEALSAGTGSPQPPSFTY	935.702	0.01	60	0.5	8.51	sp|Q15942|ZYX_HUMAN	Deamidation (NQ)	0	0	0	0	0	0	0	0	0	0	0	4740	0	0	0	0	0	0	0	0	0	0	0	0	0	0	0	0
GGGGGGGSGGGGGGGGAGAGGAGAGAVA	591.258	0.02	60	1.7	5.52			0	0	1390	0	0	1710	0	0	0	0	0	1660	0	0	0	0	0	0	0	0	0	0	0	0	0	0	0	0
DYM(+15.99)QVNGGNN(+.98)CMDMRRSLCYRNYYADNQTCDGELLFN(+.98)MT	928.165	0.01	60	0	4.36		Oxidation (M); Deamidation (NQ)	0	0	0	0	4760	0	0	0	0	0	0	0	0	0	0	0	0	0	0	0	0	0	0	0	0	0	0	0
QTIQ(+.98)IPHCPQGWDSLWIGYSFMM(+15.99)HTSAGAEGSGQALASP	836.173	0.01	60	14.3	5.15		Deamidation (NQ); Oxidation (M)	0	0	3180	0	0	1580	0	0	0	0	0	0	0	0	0	0	0	0	0	0	0	0	0	0	0	0	0	0
DKTERELLESYIDG	834.411	0.03	60	0.5	4.18			0	0	0	0	0	0	0	4780	0	0	0	0	0	0	0	0	0	0	0	0	0	0	0	0	0	0	0	0
QSSSCCGSGSGQ(+.98)Q(+.98)SGGSSCCHSSGGSGCCHSSGG	750.491	0.01	60	1.9	6.86		Deamidation (NQ)	1680	0	0	0	0	0	0	0	0	0	0	0	0	0	0	1330	1780	0	0	0	0	0	0	0	0	0	0	0
ERSKN(+.98)GVVKDQPSDAAVSSNATPSQSSSINDISSMSTEQTL	1064.24	0.04	60	10.6	4.44		Deamidation (NQ)	0	0	0	0	0	0	0	0	0	0	0	0	1170	0	0	0	3640	0	0	0	0	0	0	0	0	0	0	0
GQAGAELPM(+15.99)EPVGSLVPTLEQPQ(+.98)VPAKVRQPEGPESSPSPAGAVE	907.862	0.01	60	8.7	4.21		Oxidation (M); Deamidation (NQ)	0	477	0	0	2490	1830	0	0	0	40.7	0	0	0	0	0	0	0	0	0	0	0	0	0	0	0	0	0	0
KKKATST	763.484	0.01	60	3.3	10.3			4180	0	0	0	0	0	0	0	0	0	0	0	0	664	0	0	0	0	0	0	0	0	0	0	0	0	0	0
EPVLLVGETGTGK	650.361	0.01	60	0	4.53			0	4850	0	0	0	0	0	0	0	0	0	0	0	0	0	0	0	0	0	0	0	0	0	0	0	0	0	0
VSSCAQPVCCEPAICEPSCSVSSCCQ(+.98)PVGSEAT	816.316	0.06	60	6.5	3.67		Deamidation (NQ)	0	0	0	0	0	0	0	0	0	0	0	0	1770	0	0	3100	0	0	0	0	0	0	0	0	0	0	0	0
STFESKSYKMADEAGSEADHEGTHST	701.299	0.01	60	2.8	4.63	sp|P02671|FIBA_HUMAN		0	0	0	0	0	2390	0	0	0	0	0	0	0	0	0	2480	0	0	0	0	0	0	0	0	0	0	0	0
GAGCEDVDECLEGLDDCHYN(+.98)Q(+.98)LCENTPGGHRCSCPRGYRMQG	1148.2	0.02	60	6.4	4.49		Deamidation (NQ)	771	0	0	0	0	4100	0	0	0	0	0	0	0	0	0	0	0	0	0	0	0	0	0	0	0	0	0	0
CDTNPVNGKAICTCPSGYTGPACSQDVDECSLGANPCEHAGK	1053.95	0.01	60	7	4.43			2790	0	0	0	0	0	0	0	2090	0	0	0	0	0	0	0	0	0	0	0	0	0	0	0	0	0	0	0
KTGQIANCALPCHNPFFSQ(+.98)DERAFTVFWIGLWSVLCFVST	907.634	0.01	60	10.5	6.73		Deamidation (NQ)	0	0	995	0	0	0	0	0	784	0	0	0	0	0	0	1270	1860	0	0	0	0	0	0	0	0	0	0	0
SYKMADEAGSEADHEGTHSTKRG	493.622	0.13	60	4	5.37	sp|P02671|FIBA_HUMAN		0	0	639	0	0	0	0	1530	1540	0	0	0	0	792	411	0	0	0	0	0	0	0	0	0	0	0	0	0
QLN(+.98)CSVNGSSSYHSDDDDDDDDDDDDDN(+.98)	774.261	0.02	60	9.2	3.22		Deamidation (NQ)	3970	0	0	945	0	0	0	0	0	0	0	0	0	0	0	0	0	0	0	0	0	0	0	0	0	0	0	0
HFDLFNFDPAPMASGQSQ(+.98)QSSHSAD	681.28	0.01	60	5.5	4.4		Deamidation (NQ)	2370	0	0	0	0	0	1220	0	0	0	0	0	0	0	0	1340	0	0	0	0	0	0	0	0	0	0	0	0
HIKKLQKRALQFQGKVGLPKARRPWESDM(+15.99)RPEAEGDSEG	898.652	0.01	60	12.3	9.82		Oxidation (M)	637	0	670	1520	0	0	0	1530	39.7	0	0	0	540	0	0	0	0	0	0	0	0	0	0	0	0	0	0	0
GFLALLGLQ	466.283	0.02	60	1.2	5.52			0	0	0	0	0	0	0	0	0	0	2470	2470	0	0	0	0	0	0	0	0	0	0	0	0	0	0	0	0
EEGEFSEAREDMAALE	906.881	0.01	60	2.9	3.77	sp|P68366|TBA4A_HUMAN		0	0	0	0	0	0	0	0	4940	0	0	0	0	0	0	0	0	0	0	0	0	0	0	0	0	0	0	0
LQ(+.98)TLVKLIVLMFSTLLLVVIRVQVIQ(+.98)SQ(+.98)LP	1136.67	0.01	60	16.5	11		Deamidation (NQ)	0	1370	0	3460	0	0	0	0	0	0	0	0	0	0	116	0	0	0	0	0	0	0	0	0	0	0	0	0
KKAPK	571.4	0.05	60	2.8	10.3			0	736	0	978	0	0	563	1710	0	372	0	0	0	0	0	0	591	0	0	0	0	0	0	0	0	0	0	0
STQPSNAAGTNTTS	446.213	0.02	60	3.6	5.24			0	0	0	2780	0	0	0	0	0	2200	0	0	0	0	0	0	0	0	0	0	0	0	0	0	0	0	0	0
PTPSAPPTSQQ	555.774	0.04	60	3.6	5.96			0	0	0	0	0	0	0	2130	0	0	0	0	0	0	0	2860	0	0	0	0	0	0	0	0	0	0	0	0
KENVSGTGQVCT	611.786	0.01	60	8.1	5.99			0	0	0	3300	0	0	0	0	0	0	0	0	0	0	1690	0	0	0	0	0	0	0	0	0	0	0	0	0
HNGEGN(+.98)GQSGH	547.722	0.01	60	2.5	5.98		Deamidation (NQ)	4040	0	0	963	0	0	0	0	0	0	0	0	0	0	0	0	0	0	0	0	0	0	0	0	0	0	0	0
HKAQ(+.98)Q(+.98)SLELIQ	648.844	0.02	60	12.2	6.75		Deamidation (NQ)	0	0	0	5030	0	0	0	0	0	0	0	0	0	0	0	0	0	0	0	0	0	0	0	0	0	0	0	0
S(+42.01)DKPDM(+15.99)AEIEKFDKSKLKKTETQ	689.352	0.01	60	2.9	6.03	sp|P62328|TYB4_HUMAN	Acetylation (Protein N-term); Oxidation (M)	0	0	2210	0	0	2820	0	0	0	0	0	0	0	0	0	0	0	0	0	0	0	0	0	0	0	0	0	0
MADEAGSEADHEGTHSTKRGHA	459.603	0.21	60	2.3	5.28	sp|P02671|FIBA_HUMAN		1940	685	949	637	342	0	0	0	0	0	0	0	0	243	0	235	0	0	0	0	0	0	0	0	0	0	0	0
SGHSSTHGQ(+.98)HGSTSGQ(+.98)SSSCGQ(+.98)HGATSGQ	914.701	0.03	60	6	6.86		Deamidation (NQ)	0	0	0	0	0	0	0	0	0	0	0	0	0	0	0	5060	0	0	0	0	0	0	0	0	0	0	0	0
NRGDSTFESKSYKM(+15.99)ADEAGSEADHEGTHST	652.884	0.01	60	14.3	4.69	sp|P02671|FIBA_HUMAN	Oxidation (M)	0	0	5060	0	0	0	0	0	0	0	0	0	0	0	0	0	0	0	0	0	0	0	0	0	0	0	0	0
EGAITCCCLMEG	615.221	0.06	60	4.3	3.8			5070	0	0	0	0	0	0	0	0	0	0	0	0	0	0	0	0	0	0	0	0	0	0	0	0	0	0	0
AGVPGVGGVPGVGG	540.298	0.02	60	4.4	5.57			17.4	0	0	0	0	0	0	0	1380	0	0	0	0	1140	0	0	2550	0	0	0	0	0	0	0	0	0	0	0
GSPEGGSDS	792.291	0.02	60	12.6	3.67			0	0	0	0	0	0	0	0	0	0	0	4470	0	633	0	0	0	0	0	0	0	0	0	0	0	0	0	0
RPSAGVTGTTGLSA	637.835	0.03	60	1	9.75			0	0	5110	0	0	0	0	0	0	0	0	0	0	0	0	0	0	0	0	0	0	0	0	0	0	0	0	0
GPRAQ(+.98)TLN(+.98)P	478.249	0.06	60	5.3	9.75		Deamidation (NQ)	3120	0	0	662	0	0	0	0	0	249	0	1100	0	0	0	0	0	0	0	0	0	0	0	0	0	0	0	0
GGQDCSGSC	813.254	0.03	60	5	3.8			0	0	0	0	0	0	1390	0	0	0	0	0	0	0	3750	0	0	0	0	0	0	0	0	0	0	0	0	0
KGLQ(+.98)PPVVVLRNKIKPCLTIDSSPLSADLKK	672.596	0.02	60	7.9	9.87		Deamidation (NQ)	0	0	0	0	0	0	0	5150	0	0	0	0	0	0	0	0	0	0	0	0	0	0	0	0	0	0	0	0
NRGDSTFESKSYKMADEAGSEADHEGTHSTKRGHAKSRPV	873.016	0.04	60	1.4	7.03	sp|P02671|FIBA_HUMAN		0	0	0	0	0	0	0	5160	0	0	0	0	0	0	0	0	0	0	0	0	0	0	0	0	0	0	0	0
GEPKEVVKPVPITSPAVSKVTS	563.072	0.03	60	2.5	8.5			0	0	2680	0	0	2490	0	0	0	0	0	0	0	0	0	0	0	0	0	0	0	0	0	0	0	0	0	0
RQCISGN(+.98)CDDMDSPQSPQDDVTETPSNPN	788.568	0.01	60	7	3.61	sp|Q8NET8|TRPV3_HUMAN	Deamidation (NQ)	1760	0	0	0	0	0	3460	0	0	0	0	0	0	0	0	0	0	0	0	0	0	0	0	0	0	0	0	0
LVLQ(+.98)SLPGK	955.571	0.01	60	3.9	8.75		Deamidation (NQ)	0	0	0	0	0	0	0	0	838	0	0	0	2850	0	1540	0	0	0	0	0	0	0	0	0	0	0	0	0
TTGDACV	666.272	0.03	60	2.5	3.8			0	0	0	0	0	1490	0	3750	0	0	0	0	0	0	0	0	0	0	0	0	0	0	0	0	0	0	0	0
KFSPGAPGGSGSQPNQKLGHPEALS	612.813	0.02	60	2.9	8.6	sp|Q15942|ZYX_HUMAN		0	0	1620	0	0	3620	0	0	0	0	0	0	0	0	0	0	0	0	0	0	0	0	0	0	0	0	0	0
KRRKREPPRAK	711.451	0.02	60	5	12.01			0	5240	0	0	0	0	0	0	0	0	0	0	0	0	0	0	0	0	0	0	0	0	0	0	0	0	0	0
LGAAASRNASLEVAVLR	425.258	0.01	60	0	9.6			0	0	5260	0	0	0	0	0	0	0	0	0	0	0	0	0	0	0	0	0	0	0	0	0	0	0	0	0
MPSPKVSDTVVEPYN	554.939	0.02	60	4.4	4.37			0	0	0	0	0	0	0	0	0	0	0	0	445	0	0	0	4820	0	0	0	0	0	0	0	0	0	0	0
SVM(+15.99)PSPKVSDTVVEPYN	932.961	0.01	60	14.3	4.37		Oxidation (M)	0	0	0	0	0	0	0	0	0	0	0	0	0	0	0	0	5270	0	0	0	0	0	0	0	0	0	0	0
SLDRNLPSDSQDLGQHGLEEDFM(+15.99)	873.722	0.02	60	2.9	3.96		Oxidation (M)	0	1650	0	0	0	0	0	3630	0	0	0	0	0	0	0	0	0	0	0	0	0	0	0	0	0	0	0	0
RPANPSAYAAAYAGPDGAYPQ(+.98)GAGSA	613.785	0.01	60	4.3	5.83		Deamidation (NQ)	0	0	0	0	0	0	0	0	1270	179	0	0	0	3840	0	0	0	0	0	0	0	0	0	0	0	0	0	0
GPGGAGAGAAAGQLDAQ(+.98)	685.312	0.01	60	10.1	3.8		Deamidation (NQ)	0	0	4280	0	0	0	0	0	0	0	0	0	1060	0	0	0	0	0	0	0	0	0	0	0	0	0	0	0
VKVQGPKGLVEPVDVVDNADGTQTVN	893.464	0.02	60	2.3	4.23			0	0	0	0	0	0	0	0	1890	0	0	3470	0	0	0	0	0	0	0	0	0	0	0	0	0	0	0	0
KLVVPNK	399.262	0.01	60	4.9	10			0	0	0	0	0	3170	0	0	0	0	0	0	0	0	0	2190	0	0	0	0	0	0	0	0	0	0	0	0
RIRINLVLALIYNLVGIPIAAGVFM(+15.99)PIGIVLQ	1159.37	0.01	60	8.5	10.84		Oxidation (M)	0	774	0	0	370	0	0	1550	1840	181	648	0	0	0	0	0	0	0	0	0	0	0	0	0	0	0	0	0
KGLVKPPLK	490.336	0.03	60	7.5	10.3			0	1820	331	0	0	0	0	1570	0	410	867	388	0	0	0	0	0	0	0	0	0	0	0	0	0	0	0	0
Q(-17.03)GSGSSH	642.247	0.01	60	0	6.74		Pyro-glu from Q	0	0	0	0	0	0	0	0	0	0	0	0	0	0	5390	0	0	0	0	0	0	0	0	0	0	0	0	0
Q(+42.01)LTTALRVVGT	600.848	0.01	60	8.1	9.75		Acetylation (Protein N-term)	0	0	0	0	2670	0	0	0	0	0	0	0	0	0	0	0	2730	0	0	0	0	0	0	0	0	0	0	0
SGNVSPGTRREYHTEKLVTSKGDKEL	578.502	0.03	60	0.8	8.18	sp|P02671|FIBA_HUMAN		5410	0	0	0	0	0	0	0	0	0	0	0	0	0	0	0	0	0	0	0	0	0	0	0	0	0	0	0
RRVGT	588.353	0.1	60	4.4	12	sp|Q8NFP9|NBEA_HUMAN		0	0	0	0	0	0	0	0	0	0	0	2970	0	2460	0	0	0	0	0	0	0	0	0	0	0	0	0	0
Q(+.98)TDPPDIDINATVALDFECPMT	803.008	0.01	60	6.5	3.28		Deamidation (NQ)	0	0	0	0	0	0	0	0	2480	0	0	0	0	0	0	2970	0	0	0	0	0	0	0	0	0	0	0	0
PGGM(+15.99)EDAQ(+.98)GPEPG	629.73	0.05	60	4.7	3.57		Oxidation (M); Deamidation (NQ)	2620	0	0	0	0	0	0	0	0	917	0	0	880	0	1040	0	0	0	0	0	0	0	0	0	0	0	0	0
AGGFGFGSSSN(+.98)TTSFGTLASQ(+.98)NAPTFGSLSQ(+.98)	996.108	0.02	60	8.9	5.57		Deamidation (NQ)	0	0	0	0	0	0	2870	0	0	1330	0	0	0	0	1270	0	0	0	0	0	0	0	0	0	0	0	0	0
APKPKVNPFRPGDSEPPPAPGAQRAQ	678.113	0.01	60	4.9	9.99	sp|Q15942|ZYX_HUMAN		0	0	0	0	0	0	0	0	0	0	0	2830	0	0	0	0	2650	0	0	0	0	0	0	0	0	0	0	0
VKPVVFL	401.268	0.02	60	4	8.72			0	0	1080	0	0	1060	974	0	0	0	0	781	0	0	0	0	1660	0	0	0	0	0	0	0	0	0	0	0
YEGSYALTSEEAERSD	903.881	0.03	60	4.2	3.91			0	615	0	855	0	0	0	0	0	0	920	0	430	0	0	0	2750	0	0	0	0	0	0	0	0	0	0	0
SN(+.98)N(+.98)LRITLQFLISLCGVSSDTVL	624.576	0.01	60	10.1	5.55		Deamidation (NQ)	0	0	0	0	2190	1620	0	0	0	0	0	0	0	0	0	0	1770	0	0	0	0	0	0	0	0	0	0	0
HSM(+15.99)VSM(+15.99)LGKGFGDVGEAKGGSTTGSQFL	705.083	0.01	60	10	6.75		Oxidation (M)	0	0	0	0	0	0	0	0	0	0	0	1510	0	3290	0	0	799	0	0	0	0	0	0	0	0	0	0	0
SPCSCDCF	431.129	0.02	60	12	3.8			3480	0	0	0	0	0	0	0	0	0	0	0	2120	0	0	0	0	0	0	0	0	0	0	0	0	0	0	0
ESVGTNADT	893.379	0.01	60	4.8	3.67			0	599	0	0	0	0	0	0	1370	301	0	0	0	3350	0	0	0	0	0	0	0	0	0	0	0	0	0	0
EMPPLEGDDDTSRMEEVD	1032.92	0.02	60	3.5	3.58			0	0	2650	0	0	0	0	1320	1660	0	0	0	0	0	0	0	0	0	0	0	0	0	0	0	0	0	0	0
QSSGFSQ(+.98)HKSSSGQ(+.98)SSGYSQ(+.98)HGSGSGHSSGYGQHGSRSGQ	795.129	0.04	60	10	9.7		Deamidation (NQ)	0	0	0	0	2680	0	0	0	0	0	0	0	0	2980	0	0	0	0	0	0	0	0	0	0	0	0	0	0
TAPEPQEEVSTSENPQL	928.434	0.01	60	12.1	3.58			0	0	0	0	3910	0	0	0	760	341	90.8	0	0	0	0	0	560	0	0	0	0	0	0	0	0	0	0	0
E(-18.01)PGGVG	497.219	0.01	60	7.1	4		Pyro-glu from E	4480	0	0	0	0	0	0	0	0	145	0	1060	0	0	0	0	0	0	0	0	0	0	0	0	0	0	0	0
SAPTDVLDSLTTIPEL	836.432	0.07	60	8.6	3.49			0	0	0	0	0	0	0	0	0	0	916	1540	0	1050	1470	0	713	0	0	0	0	0	0	0	0	0	0	0
RTGPALVLGRVRPPGALLSVPVLSSLLLQ(+.98)M(+15.99)	1043.3	0.01	60	8.1	12.3		Deamidation (NQ); Oxidation (M)	0	0	0	0	700	4510	308	0	0	0	0	0	0	0	0	187	0	0	0	0	0	0	0	0	0	0	0	0
LDSET	564.245	0.01	60	6.3	3.67			0	0	0	0	3960	0	0	0	0	0	0	0	0	0	0	1750	0	0	0	0	0	0	0	0	0	0	0	0
NVEGGWAEGGRGV	644.296	0.01	60	0	4.53			5720	0	0	0	0	0	0	0	0	0	0	0	0	0	0	0	0	0	0	0	0	0	0	0	0	0	0	0
S(+42.01)GYGAGDSCRSLSLSSSKSNSQ(+.98)ALN	840.377	0.01	60	6.6	7.92		Acetylation (Protein N-term); Deamidation (NQ)	0	0	0	0	0	0	0	5740	0	0	0	0	0	0	0	0	0	0	0	0	0	0	0	0	0	0	0	0
QNAKK	588.367	0.01	60	11.5	10			0	0	0	0	234	0	595	0	0	0	0	4610	0	0	0	302	0	0	0	0	0	0	0	0	0	0	0	0
SSTRLEESEGTQ(+.98)PPSPS	895.394	0.02	60	7	4.25		Deamidation (NQ)	0	0	0	0	0	0	1080	0	513	755	0	976	0	2440	0	0	0	0	0	0	0	0	0	0	0	0	0	0
EELTGRLAQ(+.98)ARGAA	722.374	0.04	60	8.1	6.24		Deamidation (NQ)	976	0	0	1120	0	0	0	0	0	0	0	0	0	0	3690	0	0	0	0	0	0	0	0	0	0	0	0	0
LLAAL	500.338	0.01	60	17.1	5.52	sp|A1L4H1|SRCRL_HUMAN:sp|Q99698|LYST_HUMAN		0	5790	0	0	0	0	0	0	0	0	0	0	0	0	0	0	0	0	0	0	0	0	0	0	0	0	0	0
QQTSHMMSALSTNEDMQMQCELFSSPPAVSGN(+.98)ETSTTTT	842.559	0.04	60	7.9	4		Deamidation (NQ)	0	0	0	0	0	0	2150	0	0	2140	0	0	1540	0	0	0	0	0	0	0	0	0	0	0	0	0	0	0
CDNGGTWEQ(+.98)GQ(+.98)CACLPGFSGDRCQLQ(+.98)TR	1011.72	0.02	60	6.9	4.56		Deamidation (NQ)	652	0	0	1790	0	0	1730	0	0	0	0	0	0	0	1660	0	0	0	0	0	0	0	0	0	0	0	0	0
KVVVAKALKQ	542.354	0.03	60	8.2	10.3			1610	2160	0	0	0	0	0	0	936	1130	0	0	0	0	0	0	0	0	0	0	0	0	0	0	0	0	0	0
DGEFLTVDLNST	655.793	0.01	60	9.5	3.49			3400	830	0	1080	0	0	539	0	0	0	0	0	0	0	0	0	0	0	0	0	0	0	0	0	0	0	0	0
PTNVKVVLPAA	554.837	0.04	60	2.5	9.18			0	0	0	0	0	0	0	0	0	0	1610	2150	1000	0	1090	0	0	0	0	0	0	0	0	0	0	0	0	0
KSKFKSTIAAL	597.364	0.01	60	0	10.3			0	5860	0	0	0	0	0	0	0	0	0	0	0	0	0	0	0	0	0	0	0	0	0	0	0	0	0	0
HVTQASSSSVTITW	752.385	0.04	60	7.5	6.74			0	3380	715	1780	0	0	0	0	0	0	0	0	0	0	0	0	0	0	0	0	0	0	0	0	0	0	0	0
GFAGSPGARGFPG	589.273	0.02	60	0	9.75	sp|P05997|CO5A2_HUMAN		0	0	0	5910	0	0	0	0	0	0	0	0	0	0	0	0	0	0	0	0	0	0	0	0	0	0	0	0
KAPKKPTSTKKPKTM(+15.99)PRVRKPKTT	688.429	0.02	60	0	12.06		Oxidation (M)	0	0	0	0	0	0	5950	0	0	0	0	0	0	0	0	0	0	0	0	0	0	0	0	0	0	0	0	0
RRLRN(+.98)LGQPV	1209.72	0.04	60	10.7	12.3		Deamidation (NQ)	0	400	1580	257	932	0	659	75	221	458	0	489	215	0	0	0	675	0	0	0	0	0	0	0	0	0	0	0
EGSQLKALRPVQ(+.98)VRGRLQ(+.98)KPKPNAGK	953.22	0.01	60	9.9	11.74		Deamidation (NQ)	0	0	0	1850	0	0	0	4120	0	0	0	0	0	0	0	0	0	0	0	0	0	0	0	0	0	0	0	0
THRAIVAK	448.273	0.01	60	5.3	11			0	339	0	0	0	0	0	0	0	2250	0	926	0	0	0	2470	0	0	0	0	0	0	0	0	0	0	0	0
ADAEGESDLENSRKLLS	611.967	0.01	60	0	4.18			0	0	0	0	0	0	0	0	0	0	0	0	0	0	0	0	5990	0	0	0	0	0	0	0	0	0	0	0
RVAIARALIRN(+.98)PKILLLDMAT	1175.21	0.01	60	9	11.71		Deamidation (NQ)	0	478	0	621	0	1890	0	0	0	0	0	2380	0	0	621	0	0	0	0	0	0	0	0	0	0	0	0	0
TAKDALSSVQESQVAQQA	930.966	0.01	60	6.7	4.37			0	0	0	0	4280	1720	0	0	0	0	0	0	0	0	0	0	0	0	0	0	0	0	0	0	0	0	0	0
Q(-17.03)SGSEGPVG	800.329	0.01	60	2.5	4		Pyro-glu from Q	0	0	0	0	0	0	0	0	0	0	0	0	0	0	0	6010	0	0	0	0	0	0	0	0	0	0	0	0
E(-18.01)VSEFALDGLKQ	659.337	0.01	60	7	4.14		Pyro-glu from E	2920	0	0	0	0	0	0	0	0	0	0	0	0	0	0	3090	0	0	0	0	0	0	0	0	0	0	0	0
FPGN(+.98)RGLMGQ(+.98)KGEIGPPGQQG	709.679	0.01	60	1.7	8.75	sp|Q96P44|COLA1_HUMAN	Deamidation (NQ)	0	0	0	0	0	0	0	4600	0	0	0	0	0	0	0	1420	0	0	0	0	0	0	0	0	0	0	0	0
GHAGGN	512.219	0.03	60	1.2	6.74			4940	0	0	1090	0	0	0	0	0	0	0	0	0	0	0	0	0	0	0	0	0	0	0	0	0	0	0	0
CCGGV	438.141	0.01	60	4	5.51			6030	0	0	0	0	0	0	0	0	0	0	0	0	0	0	0	0	0	0	0	0	0	0	0	0	0	0	0
QSLNQDSPLSQ(+.98)PRSPAQI	983.987	0.01	60	0	5.84		Deamidation (NQ)	0	0	0	0	0	0	0	0	0	0	0	0	0	0	6060	0	0	0	0	0	0	0	0	0	0	0	0	0
EPEAELAEDLPT	657.312	0.01	60	6.8	3.45			0	0	0	0	0	0	0	0	0	832	1750	0	0	0	0	0	3520	0	0	0	0	0	0	0	0	0	0	0
QPPRISKAQK	1152.68	0.01	60	5.5	11.17			0	0	761	527	1630	914	0	403	62.6	0	0	793	0	0	797	0	216	0	0	0	0	0	0	0	0	0	0	0
LSRQLQKMEDVHQ(+.98)TLVAHGQ	1160.08	0.12	60	6.6	6.92		Deamidation (NQ)	0	0	0	3350	0	0	0	0	0	0	0	0	0	0	2760	0	0	0	0	0	0	0	0	0	0	0	0	0
VN(+.98)DNEEGFF	536.216	0.1	60	3.6	3.57	sp|P02675|FIBB_HUMAN	Deamidation (NQ)	0	0	0	0	1690	0	0	0	0	0	0	0	0	0	0	4450	0	0	0	0	0	0	0	0	0	0	0	0
KKDKQ	646.393	0.03	60	10.2	9.7			0	0	0	0	1850	0	0	0	0	0	0	0	0	0	0	0	4310	0	0	0	0	0	0	0	0	0	0	0
E(-18.01)AEVAAGARFTAPQ	700.36	0.01	60	11.2	4.53		Pyro-glu from E	0	0	6160	0	0	0	0	0	0	0	0	0	0	0	0	0	0	0	0	0	0	0	0	0	0	0	0	0
CGLTPLLLGVHEQKQ(+.98)QVVKFLIKKKANLNA	1111.31	0.02	60	13.1	9.87		Deamidation (NQ)	0	0	0	0	0	2860	0	0	0	0	0	0	3320	0	0	0	0	0	0	0	0	0	0	0	0	0	0	0
QAPPGRQPSRGGSQ(+.98)AGP	824.919	0.02	60	5.3	12		Deamidation (NQ)	0	0	0	0	0	0	0	3250	0	0	0	0	0	0	0	2930	0	0	0	0	0	0	0	0	0	0	0	0
GAGGAGFSMGFG	1015.42	0.03	60	8.1	5.52			0	0	3100	0	0	0	0	1100	0	0	0	0	1020	992	0	0	0	0	0	0	0	0	0	0	0	0	0	0
SAIPQ	515.279	0.12	60	2.5	5.24			0	0	0	0	0	0	0	0	0	0	0	0	0	0	0	6220	0	0	0	0	0	0	0	0	0	0	0	0
ISFGIHSSAISVVKILRVLRVLRP	665.918	0.03	60	7.9	12.3			2400	0	0	2140	0	0	0	0	1720	0	0	0	0	0	0	0	0	0	0	0	0	0	0	0	0	0	0	0
QDSIGEGVTQGDYTPMEDSEETSQSLQ(+.98)IDLGPLQ(+.98)SDQ(+.98)QTTTSSQDGQ	1007.64	0.01	60	11.8	3.08		Deamidation (NQ)	0	0	0	0	4170	0	1490	0	0	0	0	0	600	0	0	0	0	0	0	0	0	0	0	0	0	0	0	0
HTVIAHSN(+.98)CIEVF	735.865	0.04	60	3.4	5.98		Deamidation (NQ)	0	0	0	0	0	0	6270	0	0	0	0	0	0	0	0	0	0	0	0	0	0	0	0	0	0	0	0	0
GVKFRTRQ	496.298	0.03	60	7.2	12.01			0	0	0	0	926	0	0	0	0	0	967	1790	0	0	0	2660	0	0	0	0	0	0	0	0	0	0	0	0
SDGNSIYFHGN(+.98)EGSEFNFATTRDVDLSTEDIQ(+.98)EQWSEEFESQPTGWD	1081.46	0.05	60	11.6	3.66		Deamidation (NQ)	0	0	0	0	0	0	0	0	4020	2340	0	0	0	0	0	0	0	0	0	0	0	0	0	0	0	0	0	0
YQNIQPKKPEGTPQRILLKIFNPVLNVTAAN	877.005	0.04	60	3.1	10			0	0	0	0	0	0	0	0	2230	1400	0	0	2730	0	0	0	0	0	0	0	0	0	0	0	0	0	0	0
PPAAVAVA	695.413	0.03	60	4.6	5.96			0	0	2960	0	0	0	0	0	0	0	0	0	0	3400	0	0	0	0	0	0	0	0	0	0	0	0	0	0
ESFEKIEDN(+.98)LITFVCET	505.24	0.02	60	4.8	3.91		Deamidation (NQ)	0	0	0	0	5990	0	0	0	0	0	452	0	0	0	0	0	0	0	0	0	0	0	0	0	0	0	0	0
SSCGQHGATSGQSSSHGQHGSGSSQ(+.98)SSRYGQ(+.98)QG	1070.11	0.03	60	7	8.01		Deamidation (NQ)	0	0	0	318	2400	0	0	0	0	0	0	0	0	0	0	3760	0	0	0	0	0	0	0	0	0	0	0	0
PQSTGICS	792.378	0.01	60	3.2	5.91			0	0	2320	0	0	0	0	0	0	0	0	0	0	0	0	0	4180	0	0	0	0	0	0	0	0	0	0	0
LIVAT	516.328	0.05	60	8.2	5.52	sp|P21817|RYR1_HUMAN		1060	0	0	1410	0	1040	0	0	0	0	0	756	0	0	1040	1200	0	0	0	0	0	0	0	0	0	0	0	0
KDGKCIPFCEREQQLESCACNET	658.528	0.04	60	7.3	4.59			0	0	0	0	0	0	3180	0	0	0	3330	0	0	0	0	0	0	0	0	0	0	0	0	0	0	0	0	0
SAVDDMIADLLVD	688.822	0.02	60	8.6	3.32	sp|Q8NFP9|NBEA_HUMAN		0	0	0	0	0	0	2000	0	0	977	0	2970	564	0	0	0	0	0	0	0	0	0	0	0	0	0	0	0
HRHPDEAAFFDTASTGKTFP	558.766	0.02	60	3.8	6	sp|P02671|FIBA_HUMAN		0	0	0	0	0	0	0	2740	3780	0	0	0	0	0	0	0	0	0	0	0	0	0	0	0	0	0	0	0
FPSILAKKVSLFQQILVVQALRPDRLQSA	1089.34	0.02	60	9.5	11			0	0	110	0	0	0	0	0	6430	0	0	0	0	0	0	0	0	0	0	0	0	0	0	0	0	0	0	0
TSGNFSVDEKTQ	656.802	0.01	60	6.2	4.37			0	0	0	1490	1910	0	0	0	0	3140	0	0	0	0	0	0	0	0	0	0	0	0	0	0	0	0	0	0
SISSSGQEIQQ	582.276	0.02	60	12.2	4			0	0	1900	0	0	0	0	0	0	0	0	0	1000	1620	0	2050	0	0	0	0	0	0	0	0	0	0	0	0
VSLANTQPRGPPASSPAPAPKF	730.727	0.01	60	10.4	11	sp|Q15942|ZYX_HUMAN		0	0	0	0	0	0	0	0	0	0	0	1700	0	687	0	0	4200	0	0	0	0	0	0	0	0	0	0	0
YAGGGGGPT	736.327	0.03	60	4.1	5.52			0	0	0	0	0	0	3330	0	0	0	0	0	0	0	3260	0	0	0	0	0	0	0	0	0	0	0	0	0
NRGDSTFESKSY	464.212	0.06	60	6	6.07	sp|P02671|FIBA_HUMAN		0	1120	0	2690	0	0	0	0	0	0	985	0	0	1060	736	0	0	0	0	0	0	0	0	0	0	0	0	0
TFFNPR	391.203	0.01	60	0	9.41			0	0	0	6600	0	0	0	0	0	0	0	0	0	0	0	0	0	0	0	0	0	0	0	0	0	0	0	0
Q(-17.03)FTSSTSYN(+.98)RGDSTFESKSYKM(+15.99)	851.038	0.01	60	8.5	8.43	sp|P02671|FIBA_HUMAN	Pyro-glu from Q; Deamidation (NQ); Oxidation (M)	1870	0	0	0	3350	0	0	0	0	587	0	0	0	0	0	798	0	0	0	0	0	0	0	0	0	0	0	0
GGGVDTRDAEMPATEKDLA	644.968	0.01	60	4.9	4.11			0	0	932	0	3410	2280	0	0	0	0	0	0	0	0	0	0	0	0	0	0	0	0	0	0	0	0	0	0
Q(-17.03)CTN(+.98)TEGSYHCECD	787.25	0.02	60	7.8	4.13		Pyro-glu from Q; Deamidation (NQ)	0	0	0	6630	0	0	0	0	0	0	0	0	0	0	0	0	0	0	0	0	0	0	0	0	0	0	0	0
A(+42.01)APRPSPAISV	554.321	0.02	60	18.9	9.79	sp|Q15942|ZYX_HUMAN	Acetylation (Protein N-term)	0	0	0	0	0	4590	0	0	0	0	0	0	0	0	0	2040	0	0	0	0	0	0	0	0	0	0	0	0
RVLRSLKLLAQFRQIQIIILVLVR	722.969	0.03	60	10.9	12.48			0	0	2310	0	0	0	0	0	0	1220	0	1870	0	1290	0	0	0	0	0	0	0	0	0	0	0	0	0	0
QFTSSTSYN(+.98)RGDSTFESKSYKMA	656.549	0.01	60	3.5	8.43	sp|P02671|FIBA_HUMAN	Deamidation (NQ)	0	0	0	0	0	0	0	0	0	0	0	0	0	6700	0	0	0	0	0	0	0	0	0	0	0	0	0	0
L(+42.01)AVGPAM	700.355	0.01	60	14.9	5.52		Acetylation (Protein N-term)	0	0	0	0	0	0	0	0	6710	0	0	0	0	0	0	0	0	0	0	0	0	0	0	0	0	0	0	0
QATGSNAQSSEPPKLNALNHDPTSPQWGPGPSGEQPM(+15.99)EGSHQGAPESPDSLQ(+.98)	1070.65	0.03	60	11.1	4.35		Oxidation (M); Deamidation (NQ)	0	0	0	0	0	0	0	4100	0	0	0	0	0	0	0	0	2620	0	0	0	0	0	0	0	0	0	0	0
N(+.98)LDFLKAVDTNRASVGQDSPEPR	633.312	0.01	60	6.8	4.68		Deamidation (NQ)	4390	2330	0	0	0	0	0	0	0	0	0	0	0	0	0	0	0	0	0	0	0	0	0	0	0	0	0	0
DDEEEEN(+.98)SAFESVPDSMQ(+.98)SPELDPES	583.624	0.05	60	7	3.12		Deamidation (NQ)	0	384	1880	409	0	0	0	0	1030	0	260	212	0	1880	0	0	711	0	0	0	0	0	0	0	0	0	0	0
QSDASHLLN(+.98)Q(+.98)SGGAGEDCQ(+.98)IFSTPGHP	919.404	0.01	60	8.9	4.52		Deamidation (NQ)	0	0	5500	0	0	0	0	1270	0	0	0	0	0	0	0	0	0	0	0	0	0	0	0	0	0	0	0	0
RLQVRLVLGQ	591.381	0.03	60	5.5	12			0	0	1340	0	0	2650	0	0	0	0	0	0	0	0	0	0	2790	0	0	0	0	0	0	0	0	0	0	0
A(+42.01)EGKAGGAAGLF	545.778	0.01	60	7.6	6.05		Acetylation (Protein N-term)	2060	0	0	0	0	0	0	0	0	0	0	4720	0	0	0	0	0	0	0	0	0	0	0	0	0	0	0	0
SSSYSKQFTSSTSYNRGDSTFESKSYKMADEAGSEADHEGT	892.78	0.03	60	10.6	4.7	sp|P02671|FIBA_HUMAN		0	2180	0	2790	0	0	1040	0	0	0	777	0	0	0	0	0	0	0	0	0	0	0	0	0	0	0	0	0
HLIEHQRVH	584.817	0.01	60	0	7.03			0	0	0	0	0	6830	0	0	0	0	0	0	0	0	0	0	0	0	0	0	0	0	0	0	0	0	0	0
VN(+.98)DNEEGFFS	579.732	0.1	60	2.8	3.57	sp|P02675|FIBB_HUMAN	Deamidation (NQ)	0	0	0	0	0	0	0	0	0	0	0	0	0	0	0	3900	2940	0	0	0	0	0	0	0	0	0	0	0
NAKKM(+15.99)WPQYCQHDNDTTQESSASNQASSPENDVPDSILSPQGQNGD	1007.82	0.01	60	12	4.09	sp|Q8WXH0|SYNE2_HUMAN	Oxidation (M)	0	679	3330	0	0	0	0	0	0	0	0	0	0	0	0	0	2840	0	0	0	0	0	0	0	0	0	0	0
HLIKAQRH	1002.59	0.01	60	8.2	11			1460	0	0	0	0	5160	0	0	0	0	0	0	0	0	247	0	0	0	0	0	0	0	0	0	0	0	0	0
KVEQAVETEPEPEL	533.268	0.01	60	2	3.98			0	0	1940	0	0	4950	0	0	0	0	0	0	0	0	0	0	0	0	0	0	0	0	0	0	0	0	0	0
TPKGSSLKIEERAEFLN	640.341	0.05	60	7.4	5.9			0	1060	0	966	0	0	0	0	0	776	0	1040	0	1460	1590	0	0	0	0	0	0	0	0	0	0	0	0	0
KN(+.98)SNLLVIIVVTVGVITVLVVVIVAV	669.432	0.01	60	11.2	8.75		Deamidation (NQ)	0	0	2610	0	0	0	0	0	0	0	0	0	0	2570	1730	0	0	0	0	0	0	0	0	0	0	0	0	0
KQATRSRPNLRVIPTVT	646.391	0.02	60	11.6	12.3			395	0	0	0	0	0	0	0	1740	0	240	1140	0	0	769	2640	0	0	0	0	0	0	0	0	0	0	0	0
TKIAVVLT	422.78	0.05	60	3.4	8.41	sp|Q96P44|COLA1_HUMAN		0	0	0	1840	0	0	0	5090	0	0	0	0	0	0	0	0	0	0	0	0	0	0	0	0	0	0	0	0
QQQ(+.98)PLSAALRSLPAEKPPAPEAQPT	876.12	0.02	60	12.8	6.14		Deamidation (NQ)	0	0	2400	0	1430	0	0	0	0	0	0	0	0	0	0	0	3120	0	0	0	0	0	0	0	0	0	0	0
Q(-17.03)AATECMCN(+.98)M	1085.33	0.01	60	8.7	4		Pyro-glu from Q; Deamidation (NQ)	602	0	0	0	0	1660	0	2030	0	0	1770	0	0	0	0	0	914	0	0	0	0	0	0	0	0	0	0	0
TQHVNISQ(+.98)ADMQ(+.98)AIGNTITM(+15.99)VT	598.53	0.01	60	4.1	5.05		Deamidation (NQ); Oxidation (M)	0	0	7000	0	0	0	0	0	0	0	0	0	0	0	0	0	0	0	0	0	0	0	0	0	0	0	0	0
GFGAPSSLNK	489.263	0.01	60	6.3	8.75			0	0	0	0	0	1670	0	0	0	0	0	0	0	0	0	2730	2600	0	0	0	0	0	0	0	0	0	0	0
AQ(+.98)AAPQAQ(+.98)AGPTASPAYSSYQPTPT	821.722	0.01	60	9.1	5.57		Deamidation (NQ)	0	0	0	0	0	0	0	0	2080	0	0	0	991	0	0	3950	0	0	0	0	0	0	0	0	0	0	0	0
GQYGSGGSQ(+.98)SCSN(+.98)GQ	709.771	0.11	60	4.9	5.52		Deamidation (NQ)	2170	546	0	0	0	0	975	0	0	0	0	301	614	287	2000	0	155	0	0	0	0	0	0	0	0	0	0	0
E(-18.01)GSGPAGGEPQS	1054.43	0.01	60	11.9	3.8		Pyro-glu from E	0	0	0	0	0	0	0	7080	0	0	0	0	0	0	0	0	0	0	0	0	0	0	0	0	0	0	0	0
ILLLFKLLAT	572.885	0.01	60	6.3	8.75			0	0	0	0	0	0	5390	0	0	0	0	0	0	0	1690	0	0	0	0	0	0	0	0	0	0	0	0	0
RGPKPKPLVVQ	609.9	0.01	60	10.8	11.17			0	0	0	0	0	58.8	0	0	0	0	0	0	0	0	0	7030	0	0	0	0	0	0	0	0	0	0	0	0
GQ(+.98)CQ(+.98)CM(+15.99)PGFGGR	629.73	0.03	60	6.1	8.07		Deamidation (NQ); Oxidation (M)	5230	0	0	0	0	0	0	0	0	0	0	0	0	0	1920	0	0	0	0	0	0	0	0	0	0	0	0	0
QGKISSLKRSPALQILLTNTKVPRN(+.98)TR	1007.6	0.01	60	11.9	12.31		Deamidation (NQ)	7150	0	0	0	0	0	0	0	0	0	0	0	0	0	0	0	0	0	0	0	0	0	0	0	0	0	0	0
AEGAAGGSGGGPGGAEGGGV	736.309	0.05	60	5.9	3.8			2000	1690	0	0	0	0	0	0	0	0	0	0	0	0	3470	0	0	0	0	0	0	0	0	0	0	0	0	0
TKTAKDALSSVQESQVAQQA	697.361	0.02	60	14.1	5.73			0	0	0	0	0	0	0	5650	0	1550	0	0	0	0	0	0	0	0	0	0	0	0	0	0	0	0	0	0
AIQLTYNPDESSKPNMIDAATLKS	869.771	0.02	60	0.6	4.56			7210	0	0	0	0	0	0	0	0	0	0	0	0	0	0	0	0	0	0	0	0	0	0	0	0	0	0	0
Q(-17.03)PPTVVPGGDLAKV	680.877	0.01	60	0	5.84	sp|P68366|TBA4A_HUMAN	Pyro-glu from Q	0	0	0	0	0	0	0	0	0	0	0	0	0	0	0	0	7240	0	0	0	0	0	0	0	0	0	0	0
DSENPDHNEVPN(+.98)N(+.98)E	806.31	0.01	60	12.6	3.83		Deamidation (NQ)	0	0	0	0	0	0	2940	0	0	0	0	0	0	0	4310	0	0	0	0	0	0	0	0	0	0	0	0	0
DSSSQ	523.198	0.08	60	5.3	3.8			0	644	0	0	0	0	816	2360	0	569	0	0	1790	1130	0	0	0	0	0	0	0	0	0	0	0	0	0	0
KPPPQKSLKELQEMDKDDESLIKY	572.702	0.05	60	5.2	5	sp|P52566|GDIR2_HUMAN		0	0	2000	0	0	0	0	1710	0	0	1220	0	0	2380	0	0	0	0	0	0	0	0	0	0	0	0	0	0
LPLHLALFP	510.825	0.03	60	7.5	6.74			0	0	0	0	0	2280	0	0	2110	93.4	2830	0	0	0	0	0	0	0	0	0	0	0	0	0	0	0	0	0
PVKLLPPK	446.313	0.05	60	7.1	10.02			0	2730	0	0	0	0	0	2280	956	0	1350	0	0	0	0	0	0	0	0	0	0	0	0	0	0	0	0	0
KQMLSQ(+.98)Q(+.98)GPQMM(+15.99)APHNQMMGPQGQ	901.047	0.01	60	5	8.76	sp|Q14686|NCOA6_HUMAN	Deamidation (NQ); Oxidation (M)	0	0	0	0	0	0	4300	0	0	0	0	0	0	3020	0	0	0	0	0	0	0	0	0	0	0	0	0	0
NEGMT	551.214	0.11	60	2.1	4			0	0	0	0	1520	0	0	0	0	0	0	0	0	0	0	5820	0	0	0	0	0	0	0	0	0	0	0	0
E(-18.01)CGPSN(+.98)PATCSN(+.98)VAPFQDSECVSGCTC	897.324	0.04	60	5.2	3.57		Pyro-glu from E; Deamidation (NQ)	0	0	0	0	0	0	0	0	0	0	0	0	0	0	0	7400	0	0	0	0	0	0	0	0	0	0	0	0
PPPPSKAPMKK	589.339	0.04	60	6.8	10.31			0	0	0	0	3480	0	0	0	0	0	0	0	0	0	0	0	3940	0	0	0	0	0	0	0	0	0	0	0
E(-18.01)AAAGP	497.234	0.01	60	7.7	4		Pyro-glu from E	0	0	0	0	0	7480	0	0	0	0	0	0	0	0	0	0	0	0	0	0	0	0	0	0	0	0	0	0
ARQKKESEAVEWQQKAQMVQ	601.303	0.01	60	11.7	8.54			0	0	0	0	0	0	0	0	0	1230	0	3450	0	806	980	1040	0	0	0	0	0	0	0	0	0	0	0	0
Q(-17.03)FTSSTSYN(+.98)RGDSTFESKSYKMA	869.386	0.01	60	8.8	8.43	sp|P02671|FIBA_HUMAN	Pyro-glu from Q; Deamidation (NQ)	0	0	0	0	0	0	0	0	2960	0	0	0	4560	0	0	0	0	0	0	0	0	0	0	0	0	0	0	0
ALSVKEETKEDAEEKQ	459.232	0.25	60	2.2	4.42			0	433	684	0	0	0	0	303	741	750	586	1840	0	853	0	0	1340	0	0	0	0	0	0	0	0	0	0	0
HLQRNINENFGPN(+.98)TE	892.394	0.02	60	4.5	5.4		Deamidation (NQ)	0	883	1610	0	0	0	0	1360	0	776	0	2970	0	0	0	0	0	0	0	0	0	0	0	0	0	0	0	0
LPAAGVVL	739.472	0.11	60	4.5	5.52			0	1480	0	1530	972	1560	0	0	0	0	1020	0	0	0	1060	0	0	0	0	0	0	0	0	0	0	0	0	0
HPELRKSLLPPLIIHTAATPMSLPKSTSTGLGEALGPAS	798.65	0.06	60	4.9	8.6			0	0	4950	0	0	0	0	2680	0	0	0	0	0	0	0	0	0	0	0	0	0	0	0	0	0	0	0	0
KVIYGSSAG	441.245	0.01	60	1.9	8.59			0	0	0	0	0	0	0	0	0	3690	0	3940	0	0	0	0	0	0	0	0	0	0	0	0	0	0	0	0
ARPNNPDWGTFEEVSGNVSPGTRREYHTE	661.31	0.01	60	11.6	4.96	sp|P02671|FIBA_HUMAN		0	0	3400	0	0	0	0	3540	733	0	0	0	0	0	0	0	0	0	0	0	0	0	0	0	0	0	0	0
E(-18.01)GGMKGEKGSKGDSGMEGKSGRNGLPGA	665.817	0.01	60	10	8.53		Pyro-glu from E	0	0	0	0	0	523	0	0	0	0	0	0	1510	801	0	0	4840	0	0	0	0	0	0	0	0	0	0	0
NRSAEAQKLG	537.282	0.01	60	10.7	8.75			0	0	6890	0	0	0	0	0	0	0	0	807	0	0	0	0	0	0	0	0	0	0	0	0	0	0	0	0
Q(-17.03)GVNDN(+.98)EEGFFSARGHRPLD	743.673	0.04	60	7.4	4.75	sp|P02675|FIBB_HUMAN	Pyro-glu from Q; Deamidation (NQ)	7700	0	0	0	0	0	0	0	0	0	0	0	0	0	0	0	0	0	0	0	0	0	0	0	0	0	0	0
TLSLKRFAN	525.321	0.03	60	10.5	11			0	0	0	0	0	3170	0	1660	1000	0	0	0	0	0	1870	0	0	0	0	0	0	0	0	0	0	0	0	0
LLSPLLLLLVGGA	639.917	0.07	60	4.2	5.52			0	2060	0	0	0	0	730	1160	1410	0	1040	0	1310	0	0	0	0	0	0	0	0	0	0	0	0	0	0	0
E(-18.01)NGVDGAPGPKGEPGHRGTDGAAGP	761.369	0.01	60	4.1	4.75		Pyro-glu from E	0	2010	0	0	0	0	0	2710	1310	0	1680	0	0	0	0	0	0	0	0	0	0	0	0	0	0	0	0	0
KVHPK	608.38	0.02	60	9.7	10			0	0	3610	0	0	0	0	4120	0	0	0	0	0	0	0	0	0	0	0	0	0	0	0	0	0	0	0	0
DECQ(+.98)DSPCAQ(+.98)ECVN(+.98)T	548.847	0.02	60	2.5	3.43		Deamidation (NQ)	0	0	1640	0	0	0	0	0	0	3820	2300	0	0	0	0	0	0	0	0	0	0	0	0	0	0	0	0	0
NRVGKVEHGSVALPAIM	593.332	0.01	60	9	8.75			0	0	0	0	822	0	0	0	0	0	0	0	625	931	0	3490	1910	0	0	0	0	0	0	0	0	0	0	0
SFDSLTGCGDIIAEQDMDSM(+15.99)TDSM(+15.99)ASGGQRANRDGTKRSSCLVTYQ(+.98)GGGEE	1074.27	0.03	60	10.5	4.12		Oxidation (M); Deamidation (NQ)	0	0	0	0	0	0	0	0	6430	0	0	0	1350	0	0	0	0	0	0	0	0	0	0	0	0	0	0	0
SSMDSQ(+.98)M(+15.99)LASGTMDSQMLASGTM	795.322	0.01	60	0.6	3.56		Deamidation (NQ); Oxidation (M)	0	0	0	2120	5660	0	0	0	0	0	0	0	0	0	0	0	0	0	0	0	0	0	0	0	0	0	0	0
TAINACEISN(+.98)GGCSA	706.302	0.02	60	15.6	4		Deamidation (NQ)	4310	0	0	0	0	0	3230	281	0	0	0	0	0	0	0	0	0	0	0	0	0	0	0	0	0	0	0	0
DSAGKNGLTPLHVAAHYDN(+.98)Q(+.98)KVALLLLEKGA	812.199	0.01	60	0.8	6.92		Deamidation (NQ)	0	0	0	0	0	1400	0	0	0	0	0	0	151	0	0	6280	0	0	0	0	0	0	0	0	0	0	0	0
ACNAECVM(+15.99)	856.29	0.04	60	7.7	4		Oxidation (M)	0	0	0	0	0	0	0	0	1640	0	0	6210	0	0	0	0	0	0	0	0	0	0	0	0	0	0	0	0
HSKVN	584.33	0.18	60	3.6	8.76			0	847	0	886	0	0	843	1060	500	354	655	491	712	740	0	780	0	0	0	0	0	0	0	0	0	0	0	0
SYKM(+15.99)ADEAGSEADHEGTHSTKRGHA	538.442	0.01	60	2.5	5.76	sp|P02671|FIBA_HUMAN	Oxidation (M)	0	0	0	0	0	0	0	0	1170	0	0	0	5530	470	0	709	0	0	0	0	0	0	0	0	0	0	0	0
QYGQVSPLLASQ(+.98)GLASPG	887.455	0.03	60	4.7	5.52		Deamidation (NQ)	0	0	3510	0	0	0	0	0	0	0	0	0	0	0	0	0	4390	0	0	0	0	0	0	0	0	0	0	0
KGISSSSLKEKKLSPGDRV	1008.58	0.02	60	5.7	10			7070	587	0	0	0	0	275	0	0	0	0	0	0	0	0	0	0	0	0	0	0	0	0	0	0	0	0	0
TGGLGDPGQ(+.98)GTVALKKGEEGQSIVGKGLGTPKTTELKEAEPQ(+.98)GK	1088.33	0.02	60	5.1	6.03		Deamidation (NQ)	0	0	0	0	0	4640	0	3300	0	0	0	0	0	0	0	0	0	0	0	0	0	0	0	0	0	0	0	0
QN(+.98)GWHCVCQ(+.98)PGWRGAGCDVAM(+15.99)ETLCT	710.788	0.01	60	15.7	5.32		Deamidation (NQ); Oxidation (M)	0	0	1420	0	0	1540	0	0	833	0	723	0	0	0	0	3430	0	0	0	0	0	0	0	0	0	0	0	0
Q(-17.03)LGLPGPPDVPDHA	698.347	0.03	60	4.3	4.2		Pyro-glu from Q	0	0	0	0	0	5800	0	2160	0	0	0	0	0	0	0	0	0	0	0	0	0	0	0	0	0	0	0	0
KFEASESPCLECPEHT	602.929	0.01	60	3	4.48			0	0	4020	0	0	0	0	0	0	0	0	0	0	0	0	0	3940	0	0	0	0	0	0	0	0	0	0	0
KKGKMKK	424.281	0.03	60	4	10.6			0	3390	0	0	0	378	0	4210	0	0	0	0	0	0	0	0	0	0	0	0	0	0	0	0	0	0	0	0
IFKSLGLK	453.3	0.03	60	6.5	10			0	2470	0	0	0	1330	0	0	853	0	2320	1050	0	0	0	0	0	0	0	0	0	0	0	0	0	0	0	0
AGARGN(+.98)DGATGAAGPPGPT	798.351	0.01	60	6.2	5.88		Deamidation (NQ)	0	0	0	0	0	0	0	0	0	3700	0	0	0	0	0	4340	0	0	0	0	0	0	0	0	0	0	0	0
GRVAL	515.337	0.02	60	8.4	9.75			0	2870	0	0	0	782	0	871	0	0	3530	0	0	0	0	0	0	0	0	0	0	0	0	0	0	0	0	0
NEEGFFSA	450.691	0.08	60	1.4	3.79	sp|P02675|FIBB_HUMAN		3190	2510	0	2380	0	0	0	0	0	0	0	0	0	0	0	0	0	0	0	0	0	0	0	0	0	0	0	0
TSAGLKLILK	522.35	0.04	60	4.1	10			1560	0	1110	0	1540	0	0	0	0	1010	887	1240	0	0	736	0	0	0	0	0	0	0	0	0	0	0	0	0
ALRYYN(+.98)QSEAGSHTLQ(+.98)RMYGCDVGP	705.316	0.01	60	8.2	6.78		Deamidation (NQ)	0	0	1960	0	0	0	0	2690	0	0	0	323	0	0	0	0	3110	0	0	0	0	0	0	0	0	0	0	0
YEGSYALTSEEAERSDGDPVQPAVLQVHQ	1059.16	0.04	60	10	4.08			0	0	0	0	0	0	0	0	3670	0	0	4490	0	0	0	0	0	0	0	0	0	0	0	0	0	0	0	0
KDASEDSAQSGSEGGSGHASAHYM(+15.99)YRQEGYETVSYGDN	809.522	0.01	60	9.9	4.43		Oxidation (M)	0	0	0	0	0	0	0	0	3560	0	0	0	0	0	4620	0	0	0	0	0	0	0	0	0	0	0	0	0
KRKRSLKLILEKKLAILERAIESN(+.98)Q	745.458	0.02	60	3	10.55		Deamidation (NQ)	0	0	0	0	0	0	2880	1900	0	3410	0	0	0	0	0	0	0	0	0	0	0	0	0	0	0	0	0	0
SSCCQPSCCETSCCQPSCCQTSSCGTGCGIGGGIGYGQ	729.261	0.01	60	10.9	4			0	0	3710	0	0	0	0	0	0	0	66.8	0	1580	1630	1220	0	0	0	0	0	0	0	0	0	0	0	0	0
KSRLSN(+.98)LIKLAQKVPT	599.698	0.03	60	8.9	11.26		Deamidation (NQ)	0	0	1850	0	0	0	0	0	2670	1690	0	2000	0	0	0	0	0	0	0	0	0	0	0	0	0	0	0	0
WQ(+.98)SPPLSRGLEYN(+.98)EVN(+.98)VT	697.998	0.02	60	1.8	4.53		Deamidation (NQ)	0	0	0	0	0	0	0	2500	5710	0	0	0	0	0	0	0	0	0	0	0	0	0	0	0	0	0	0	0
KSLEDKTERELLESYIDGR	571.048	0.01	60	4.8	4.66			0	3210	0	0	0	0	0	0	0	0	0	0	0	0	5010	0	0	0	0	0	0	0	0	0	0	0	0	0
QILSYLRQ(+.98)GTRNKKLKKKDKGKLEEKKP	1119.32	0.01	60	14.5	10.36		Deamidation (NQ)	0	0	0	8260	0	0	0	0	0	0	0	0	0	0	0	0	0	0	0	0	0	0	0	0	0	0	0	0
ELKLKDEECERL	752.882	0.03	60	3.1	4.59			0	0	4180	4100	0	0	0	0	0	0	0	0	0	0	0	0	0	0	0	0	0	0	0	0	0	0	0	0
M(+42.01)AGAASPCAN(+.98)GCGPGAPS	781.298	0.04	60	8.4	5.27		Acetylation (Protein N-term); Deamidation (NQ)	0	0	0	0	0	0	4450	0	0	0	0	0	0	0	3840	0	0	0	0	0	0	0	0	0	0	0	0	0
KSESSTSAFST	566.256	0.03	60	1.6	6			0	0	974	0	0	0	0	0	0	0	0	0	0	2100	0	5220	0	0	0	0	0	0	0	0	0	0	0	0
KKLLLLVC	465.309	0.02	60	11.6	9.31			2840	142	0	0	0	868	626	704	0	0	864	0	968	650	0	632	0	0	0	0	0	0	0	0	0	0	0	0
SHTPSSQ	372.177	0.01	60	7.9	6.46			0	0	0	0	2880	5420	0	0	0	0	0	0	0	0	0	0	0	0	0	0	0	0	0	0	0	0	0	0
KVTLPLAK	435.308	0.03	60	8.3	10			0	0	0	0	0	0	3850	0	3670	817	0	0	0	0	0	0	0	0	0	0	0	0	0	0	0	0	0	0
GSKPV	487.286	0.07	60	4.8	8.75			0	0	0	2570	0	0	1390	0	1670	0	1500	0	1230	0	0	0	0	0	0	0	0	0	0	0	0	0	0	0
GGGGSVCGYSGGGSGCGGGSSGGSG	932.839	0.28	60	7.2	5.51			1140	0	0	1250	0	0	856	0	0	696	649	1440	795	739	803	0	0	0	0	0	0	0	0	0	0	0	0	0
VAGIPAVKLG	462.818	0.03	60	12.3	8.72			0	737	0	44.5	0	0	3750	1150	357	0	0	0	2160	0	0	0	196	0	0	0	0	0	0	0	0	0	0	0
KGQKLIKQIQELEEVLSGLTLSPEQG	955.887	0.02	60	6.6	4.95			0	0	0	0	0	3090	1490	0	1430	0	0	0	0	1330	1070	0	0	0	0	0	0	0	0	0	0	0	0	0
GQEAQ(+.98)DEDSSDSEADEQSISQDPKDTPSQ(+.98)PSSTSHRPRAASCRATAAWCTD	1088.45	0.02	60	13	4.14		Deamidation (NQ)	0	0	0	0	0	3350	0	985	0	0	0	0	4080	0	0	0	0	0	0	0	0	0	0	0	0	0	0	0
TKPVPK	669.438	0.01	60	8	10			0	277	0	8140	0	0	0	0	0	0	0	0	0	0	0	0	0	0	0	0	0	0	0	0	0	0	0	0
DVDSDT	651.25	0.01	60	2.3	3.42			0	0	0	90.4	0	0	8330	0	0	0	0	0	0	0	0	0	0	0	0	0	0	0	0	0	0	0	0	0
ENGQPQNCGGQWRTGSSQSSCCGQYGSGGSQSCSN(+.98)GQ(+.98)HEYGSCGRFS	968.192	0.01	60	5.3	6.79		Deamidation (NQ)	8500	0	0	0	0	0	0	0	0	0	0	0	0	0	0	0	0	0	0	0	0	0	0	0	0	0	0	0
E(-18.01)LLAKKRGSKGKLEAIITPPPAKKAKSPS	1009.28	0.01	60	6.3	10.39		Pyro-glu from E	0	1730	0	0	0	0	0	0	1040	116	0	95.7	15.4	781	2210	2520	0	0	0	0	0	0	0	0	0	0	0	0
AGSRN(+.98)AGAFGFNISFLCKLRDTKST	666.344	0.02	60	7.5	10.05		Deamidation (NQ)	0	0	0	0	2540	0	377	417	2750	1480	954	0	0	0	0	0	0	0	0	0	0	0	0	0	0	0	0	0
QDFWN(+.98)CGCQ(+.98)IVAMNFQTPGPMMDLHT	598.046	0.04	60	3.9	4.2		Deamidation (NQ)	0	0	0	0	0	0	8520	0	0	0	0	0	0	0	0	0	0	0	0	0	0	0	0	0	0	0	0	0
AADSM(+15.99)IPEEEDDEDDEDGGGRAGSAM(+15.99)AIGGGG	1038.4	0.06	60	10.2	3.42		Oxidation (M)	3030	0	0	0	0	0	0	2680	0	0	2890	0	0	0	0	0	0	0	0	0	0	0	0	0	0	0	0	0
QAGAAGSRMNFRPGVLSS	602.638	0.02	60	3.2	12			2940	1020	0	0	0	0	0	0	0	0	0	0	0	0	3080	1560	0	0	0	0	0	0	0	0	0	0	0	0
HLKETQPGLLVASVLGLQKNN(+.98)KI	834.507	0.01	60	9.5	9.7		Deamidation (NQ)	0	4410	0	0	0	0	0	899	0	0	0	0	0	0	0	3300	0	0	0	0	0	0	0	0	0	0	0	0
ALPAAELGLYSLVLSGALA	915.037	0.01	60	10.9	4			0	645	3220	0	0	0	0	2790	0	0	0	0	0	1980	0	0	0	0	0	0	0	0	0	0	0	0	0	0
KNNNCIP	802.385	0.01	60	7	8.22			0	0	0	0	0	0	0	0	5560	0	3140	0	0	0	0	0	0	0	0	0	0	0	0	0	0	0	0	0
GFKRTK	368.737	0.09	60	4.8	11.17			0	0	2440	0	2350	0	0	0	0	382	0	0	0	0	0	1960	1570	0	0	0	0	0	0	0	0	0	0	0
GLPGPPDVPDHAAY	703.343	0.01	60	9.3	4.2			0	0	1460	0	0	7250	0	0	0	0	0	0	0	0	0	0	0	0	0	0	0	0	0	0	0	0	0	0
SPNQ(+.98)GFN(+.98)LN(+.98)GIVEI	752.866	0.02	60	4.1	4		Deamidation (NQ)	8790	0	0	0	0	0	0	0	0	0	0	0	0	0	0	0	0	0	0	0	0	0	0	0	0	0	0	0
KEKVLLRRKSELP	798.514	0.01	60	7.8	10.28			0	0	0	0	2480	0	0	0	0	0	0	0	0	6080	254	0	0	0	0	0	0	0	0	0	0	0	0	0
RGDSTFESKSYKMADEAGSEADHEGTHST	626.872	0.05	60	3.9	4.69	sp|P02671|FIBA_HUMAN		0	0	4330	0	0	4500	0	0	0	0	0	0	0	0	0	0	0	0	0	0	0	0	0	0	0	0	0	0
EGSSETSSQ(+.98)SEESYFCGISACTSLCN(+.98)GQ	965.038	0.03	60	9.8	3.58		Deamidation (NQ)	0	0	3110	0	0	0	0	0	0	0	0	0	0	0	0	5720	0	0	0	0	0	0	0	0	0	0	0	0
SSHISEELTTTTE	717.832	0.02	60	5.4	4.24			0	0	0	0	0	0	0	0	0	0	917	4840	0	1730	1350	0	0	0	0	0	0	0	0	0	0	0	0	0
RVVSLLLGAA	499.82	0.01	60	3.7	9.75			0	1260	7580	0	0	0	0	0	0	0	0	0	0	0	0	0	0	0	0	0	0	0	0	0	0	0	0	0
GGGAAGGGAA	645.295	0.05	60	5.7	5.52			0	719	0	0	1190	0	0	1350	0	0	0	0	1000	1390	0	1620	1580	0	0	0	0	0	0	0	0	0	0	0
KKITELSKEVFN(+.98)LKEALKEQPAAL	910.197	0.01	60	7.2	8.38		Deamidation (NQ)	0	0	0	0	0	0	1510	0	2720	0	0	0	1850	2780	0	0	0	0	0	0	0	0	0	0	0	0	0	0
RQTWSVLLLLLLFFIPGVVM(+15.99)AVAYGLISR	1098	0.01	60	11.2	10.84		Oxidation (M)	1140	4410	0	3310	0	0	0	0	0	0	0	0	0	0	0	0	0	0	0	0	0	0	0	0	0	0	0	0
DFSN(+.98)TVACTD	537.212	0.02	60	2.9	3.56		Deamidation (NQ)	0	5990	0	0	0	0	0	0	0	0	0	0	0	0	0	2890	0	0	0	0	0	0	0	0	0	0	0	0
RLPLAVALL	483.33	0.04	60	6.9	9.75			265	4230	0	0	0	388	0	2370	973	689	0	0	0	0	0	0	0	0	0	0	0	0	0	0	0	0	0	0
REREIKKALIIKLRRGKPGFQGQ	907.888	0.01	60	7.1	11.58			1780	0	0	0	0	0	2170	1060	0	0	0	0	0	1250	0	2690	0	0	0	0	0	0	0	0	0	0	0	0
PASSPAPAPKFSPVTPKFTPVAS	761.077	0.01	60	0	10.02	sp|Q15942|ZYX_HUMAN		0	0	8960	0	0	0	0	0	0	0	0	0	0	0	0	0	0	0	0	0	0	0	0	0	0	0	0	0
GVALSPALLLLLLLPPP	849.051	0.04	60	6.5	5.52			0	1200	0	0	0	0	844	0	0	0	1360	0	2280	0	0	0	3280	0	0	0	0	0	0	0	0	0	0	0
VGAAGVVVGVGGAVGV	634.373	0.05	60	7.7	5.49			0	0	0	5360	0	0	632	0	0	2990	0	0	0	0	0	0	0	0	0	0	0	0	0	0	0	0	0	0
TVSDPCFSSPCGGR	706.784	0.08	60	4.7	5.5			3490	0	0	0	0	0	1690	0	0	0	0	0	0	0	0	3810	0	0	0	0	0	0	0	0	0	0	0	0
SSM(+15.99)GQ(+.98)SSAFQ(+.98)LS	1247.52	0.02	60	2.7	5.24		Oxidation (M); Deamidation (NQ)	3080	0	0	0	0	0	0	0	0	0	0	0	0	4010	0	1940	0	0	0	0	0	0	0	0	0	0	0	0
Q(-17.03)LVVPSKAKAEKPPLS	558.995	0.02	60	4.7	9.7		Pyro-glu from Q	0	0	2980	0	0	0	0	0	0	0	0	0	0	0	0	6070	0	0	0	0	0	0	0	0	0	0	0	0
LDEAEQIALKGGKKQLQ(+.98)KLEARVR	908.2	0.01	60	6.7	9.52		Deamidation (NQ)	0	2260	0	0	3960	0	0	0	0	0	0	2870	0	0	0	0	0	0	0	0	0	0	0	0	0	0	0	0
QQQQLLLPFYLHDLKVGPKLTLAG	907.542	0.01	60	14.6	8.51			0	0	5400	3700	0	0	0	0	0	0	0	0	0	0	0	0	0	0	0	0	0	0	0	0	0	0	0	0
AKGPEGPP	752.374	0.02	60	6.5	6.05			0	0	0	0	0	0	0	0	0	7120	0	0	0	0	0	0	1990	0	0	0	0	0	0	0	0	0	0	0
TAEPSWGPQDEGSEPPTT	629.271	0.03	60	6.5	3.5			0	0	0	0	0	4830	0	0	0	0	0	0	0	2170	0	2140	0	0	0	0	0	0	0	0	0	0	0	0
CSPDTGSC	385.127	0.1	60	2.6	3.8			0	742	0	2250	0	0	1390	0	0	2190	1590	0	0	0	0	994	0	0	0	0	0	0	0	0	0	0	0	0
FM(+15.99)PGFAPLTSRGSQ(+.98)QYRALTVPELTQQMFDSKN(+.98)MMAA	834.385	0.01	60	13.1	8.59		Oxidation (M); Deamidation (NQ)	0	0	0	0	0	0	0	2570	0	0	0	6620	0	0	0	0	0	0	0	0	0	0	0	0	0	0	0	0
RHQGVMVGMGQKDSYVGDEAQSKRGILT	610.308	0.04	60	4.7	8.5			0	0	0	0	0	0	0	0	0	1490	0	0	0	0	0	2280	5450	0	0	0	0	0	0	0	0	0	0	0
IFALEKTFEQTKYLAGPERARLAYSLGMTESQVKVWFQ(+.98)NRR	973.497	0.01	60	0	9.82		Deamidation (NQ)	0	0	0	9240	0	0	0	0	0	0	0	0	0	0	0	0	0	0	0	0	0	0	0	0	0	0	0	0
N(+.98)TQPRGPPASSPAPAPKF	607.646	0.01	60	11.2	11	sp|Q15942|ZYX_HUMAN	Deamidation (NQ)	0	0	0	0	5390	3850	0	0	0	0	0	0	0	0	0	0	0	0	0	0	0	0	0	0	0	0	0	0
GGGSKGN(+.98)KNGDNNSNHN(+.98)GEGNGQ(+.98)SGHSAAG	696.529	0.03	60	5.3	6.92		Deamidation (NQ)	0	0	0	0	0	0	0	0	6030	0	3240	0	0	0	0	0	0	0	0	0	0	0	0	0	0	0	0	0
EGKEWLRSHSTGGLQ(+.98)DTGN(+.98)Q(+.98)SPLVSPSAMSSSAAGK	732.927	0.02	60	7.4	6.86		Deamidation (NQ)	9270	0	0	0	0	0	0	0	0	0	0	0	0	0	0	0	0	0	0	0	0	0	0	0	0	0	0	0
EEEDDGM(+15.99)ND	535.164	0.08	60	3.3	3.29		Oxidation (M)	6620	0	0	2660	0	0	0	0	0	0	0	0	0	0	0	0	0	0	0	0	0	0	0	0	0	0	0	0
KGGAKRHRKVLRDNIQGITKPAI	852.839	0.05	60	7.5	11.74			0	0	0	1060	0	0	918	0	0	1240	0	3190	0	2890	0	0	0	0	0	0	0	0	0	0	0	0	0	0
GGLRPN	613.344	0.01	60	7.9	9.75			0	0	2230	1210	0	3370	0	0	0	0	0	0	0	649	0	0	1890	0	0	0	0	0	0	0	0	0	0	0
GQ(+.98)GVCMELAEIEAI	732.349	0.02	60	10.5	3.67		Deamidation (NQ)	1600	0	0	0	0	0	0	0	0	1590	0	4310	0	0	0	1860	0	0	0	0	0	0	0	0	0	0	0	0
EGYN(+.98)YEFDEDEEC	548.181	0.03	60	4.2	3.3		Deamidation (NQ)	3740	0	0	0	0	0	1780	0	0	1600	0	0	0	0	2250	0	0	0	0	0	0	0	0	0	0	0	0	0
Q(-17.03)YTSAIEGTKSAKPTKPAASDLPVPAEGVRNI	820.681	0.02	60	8.6	8.43		Pyro-glu from Q	0	0	0	0	0	0	0	0	4400	1540	0	3440	0	0	0	0	0	0	0	0	0	0	0	0	0	0	0	0
NEATGGKYVPRAVLVD	563.635	0.03	60	5.4	6.07			0	0	0	0	1990	0	0	0	0	0	0	0	0	0	0	1480	5920	0	0	0	0	0	0	0	0	0	0	0
TVVPPAPPAP	473.268	0.01	60	0	5.19			0	0	0	0	0	0	0	0	0	0	9400	0	0	0	0	0	0	0	0	0	0	0	0	0	0	0	0	0
VEGEIAEEAAEKATS	511.914	0.01	60	5.6	3.98			0	0	1330	0	2550	1930	0	0	0	696	0	469	0	0	0	0	2440	0	0	0	0	0	0	0	0	0	0	0
Q(+.98)AGM(+15.99)CGDIFESVHSS	792.827	0.01	60	5.7	4.35		Deamidation (NQ); Oxidation (M)	3720	0	0	0	0	0	0	0	0	0	0	5750	0	0	0	0	0	0	0	0	0	0	0	0	0	0	0	0
SPPKRGPLP	474.786	0.03	60	2	11			2920	1370	1310	0	2810	0	0	0	0	0	1080	0	0	0	0	0	0	0	0	0	0	0	0	0	0	0	0	0
EEIFPSPPPPPEEEGGPEAPIPPPPQPREKVS	1143.24	0.02	60	3.7	4.12	sp|Q15942|ZYX_HUMAN		0	2860	0	0	0	0	0	0	5350	0	0	0	0	0	1290	0	0	0	0	0	0	0	0	0	0	0	0	0
AMSQDM(+15.99)GNTQDMFSPDQ(+.98)SSM(+15.99)PMSNVGTT	757.801	0.02	60	11.4	3.42		Oxidation (M); Deamidation (NQ)	0	0	2270	0	0	4820	0	2420	0	0	0	0	0	0	0	0	0	0	0	0	0	0	0	0	0	0	0	0
PGQEPPEHMAELQRNEQEQPLGQWHLS	792.123	0.02	60	0.6	4.62			0	0	0	0	0	6810	0	0	2760	0	0	0	0	0	0	0	0	0	0	0	0	0	0	0	0	0	0	0
QCQHN(+.98)AAGEFCELCAPGYYGDATA	840.665	0.05	60	4.5	4.13		Deamidation (NQ)	0	0	0	0	0	0	3570	0	1770	0	0	0	0	4250	0	0	0	0	0	0	0	0	0	0	0	0	0	0
FAGLKNLRVL	565.865	0.01	60	11.6	11			0	0	0	0	0	4920	0	0	0	0	0	3940	0	0	0	0	736	0	0	0	0	0	0	0	0	0	0	0
VCVSSDTLDGNSSSAGS	793.333	0.03	60	8.8	3.56			2750	0	0	0	0	0	382	3760	0	1080	0	1630	0	0	0	0	0	0	0	0	0	0	0	0	0	0	0	0
HPVVK	579.371	0.03	60	11.1	8.76			0	0	0	0	0	370	0	0	0	0	6170	0	374	2700	0	0	0	0	0	0	0	0	0	0	0	0	0	0
GSEMVVAGKLQDR	463.91	0.15	60	3	6.07			0	3260	0	2530	0	0	1350	1010	0	0	0	0	1500	0	0	0	0	0	0	0	0	0	0	0	0	0	0	0
LVEGEIAEEAAEKATSRGSN	687.673	0.01	60	2.6	4.33			0	0	0	0	0	0	0	1080	4820	2060	0	0	1710	0	0	0	0	0	0	0	0	0	0	0	0	0	0	0
SSRSPDQ(+.98)TLSPASMTSSSISGEPTSLYSQ	748.075	0.07	60	8.8	4.37		Deamidation (NQ)	0	0	0	0	0	0	0	0	1950	0	781	2650	1990	0	0	2310	0	0	0	0	0	0	0	0	0	0	0	0
TAFGGRRAVPPNNSNAAEDDLPTVELQ(+.98)GVVPR	837.931	0.01	60	6.5	4.78		Deamidation (NQ)	0	0	0	0	0	0	0	0	0	0	0	5530	0	0	4240	0	0	0	0	0	0	0	0	0	0	0	0	0
A(+42.01)DKPDMGEIASFDKAKLKKTETQEKNTLPTKETIEQEKRSEIS	987.71	0.03	60	3.5	5.32		Acetylation (Protein N-term)	0	0	0	0	0	0	0	7370	0	0	0	0	0	2430	0	0	0	0	0	0	0	0	0	0	0	0	0	0
YPVRVTDKTSI	639.857	0.01	60	8.8	8.59			0	0	0	9150	0	0	0	0	0	678	0	0	0	0	0	0	0	0	0	0	0	0	0	0	0	0	0	0
NLDFLKAVDTNRASVGQDSPEPR	843.758	0.01	60	1.2	4.68			0	3060	0	0	0	0	0	6790	0	0	0	0	0	0	0	0	0	0	0	0	0	0	0	0	0	0	0	0
QSVLQRRRKLRRRKTISGIPRR	690.939	0.07	60	6.4	12.85			0	0	0	0	0	0	0	2550	3760	0	0	0	0	3560	0	0	0	0	0	0	0	0	0	0	0	0	0	0
FRPGVLSSRQLGLPGPPDVPDHAA	621.586	0.01	60	0	6.75			0	0	0	0	0	0	0	9870	0	0	0	0	0	0	0	0	0	0	0	0	0	0	0	0	0	0	0	0
KIQEKALGPGLRAGPGLRKGLGLPLSPV	941.577	0.01	60	7.4	11.1			0	3160	0	0	0	1230	0	0	0	0	0	0	0	0	5660	0	0	0	0	0	0	0	0	0	0	0	0	0
DGGGEEGGGGDGGGGGGD	682.239	0.01	60	3.3	3.33			0	0	0	0	0	4160	0	0	0	0	0	0	0	0	4860	0	1070	0	0	0	0	0	0	0	0	0	0	0
KREEAPSLRPAPPPISGGGY	520.529	0.01	60	1.9	8.59	sp|P02675|FIBB_HUMAN		0	0	0	0	0	0	0	0	0	0	0	0	0	0	0	10100	0	0	0	0	0	0	0	0	0	0	0	0
ATGTKDTVCSGVTGAM(+15.99)N(+.98)LARGTIQ	790.374	0.05	60	5.1	8.27		Oxidation (M); Deamidation (NQ)	0	2210	0	0	0	0	0	0	0	1100	2100	3020	1710	0	0	0	0	0	0	0	0	0	0	0	0	0	0	0
STPHVAEPAENEQDEQDENGAEASADLR	1003.76	0.02	60	8.9	3.84			0	0	0	0	0	0	970	0	0	0	0	0	0	926	1400	2940	3920	0	0	0	0	0	0	0	0	0	0	0
GFAIK	535.332	0.01	60	7.9	8.75			0	0	0	0	0	0	0	0	0	1210	0	0	0	0	0	8950	0	0	0	0	0	0	0	0	0	0	0	0
DNN(+.98)FITVIEPS	625.291	0.01	60	6.9	3.67		Deamidation (NQ)	0	0	0	9460	0	700	0	0	0	0	0	0	0	0	0	0	0	0	0	0	0	0	0	0	0	0	0	0
WGHPCEMCPAQ(+.98)PQ(+.98)PC	562.538	0.03	60	7.9	5.24		Deamidation (NQ)	0	0	0	0	0	0	7480	0	0	0	0	0	0	0	2740	0	0	0	0	0	0	0	0	0	0	0	0	0
NFQ(+.98)HCQMCECDS	723.241	0.05	60	5.8	4.35		Deamidation (NQ)	103	0	0	981	0	0	0	0	0	1600	0	0	6850	0	698	0	0	0	0	0	0	0	0	0	0	0	0	0
LLLLVAIVGFQ	593.391	0.01	60	3.3	5.52			0	5190	0	904	0	0	0	4160	0	0	0	0	0	0	0	0	0	0	0	0	0	0	0	0	0	0	0	0
KPPKPPR	410.268	0.02	60	6.6	11.17			0	0	0	0	1820	0	0	269	0	1030	7150	0	0	0	0	0	0	0	0	0	0	0	0	0	0	0	0	0
S(+42.01)DKPDM(+15.99)AEIEKFDKS	599.943	0.02	60	6.8	4.44	sp|P62328|TYB4_HUMAN	Acetylation (Protein N-term); Oxidation (M)	0	0	2000	0	5860	2430	0	0	0	0	0	0	0	0	0	0	0	0	0	0	0	0	0	0	0	0	0	0
GHSNQCQDGSGICVN(+.98)CQ(+.98)HNTAGEH	625.242	0.09	60	4.1	5.72		Deamidation (NQ)	0	0	1960	0	0	2480	0	0	0	1080	755	0	918	0	0	1300	1800	0	0	0	0	0	0	0	0	0	0	0
FLKAVDTNRASVGQDSPEPR	547.534	0.04	60	7.5	6.12			0	2500	0	5380	0	0	1730	0	0	0	0	0	0	0	684	0	0	0	0	0	0	0	0	0	0	0	0	0
AIQLTYNPDESSKPNM(+15.99)IDAATL	803.393	0.04	60	5.9	4.03		Oxidation (M)	10300	0	0	0	0	0	0	0	0	0	0	0	0	0	0	0	0	0	0	0	0	0	0	0	0	0	0	0
HPLLGVK	382.25	0.02	60	5.5	8.76			2390	0	0	0	0	3350	0	0	0	0	4560	0	0	0	0	0	0	0	0	0	0	0	0	0	0	0	0	0
KGAGKFILKLKEQVQASREDKKKG	896.219	0.01	60	8.5	10.12			0	0	0	0	0	0	0	0	0	0	0	0	2230	8100	0	0	0	0	0	0	0	0	0	0	0	0	0	0
Q(-17.03)CACNP	618.197	0.05	60	4.8	5.51		Pyro-glu from Q	0	0	1750	0	0	0	0	2530	56.4	283	89.2	5300	213	141	0	0	0	0	0	0	0	0	0	0	0	0	0	0
VLEEDEEVTEEAE	760.825	0.02	60	8.5	3.31			0	0	0	0	3050	0	0	1990	0	0	0	0	472	0	0	0	4870	0	0	0	0	0	0	0	0	0	0	0
CDASCCSPSCYSSSCYSTSCYSSS	617.696	0.1	60	5.4	3.8			0	0	0	0	0	0	0	0	2580	866	3370	0	1410	0	2160	0	0	0	0	0	0	0	0	0	0	0	0	0
YEGSYALTSEEAERSDGDPVQPA	824.366	0.01	60	5.7	3.77			0	0	0	0	0	0	0	2500	2200	0	2510	0	0	3180	0	0	0	0	0	0	0	0	0	0	0	0	0	0
QPPTVVPGGDLAKVQRA	578.326	0.02	60	0	8.75	sp|P68366|TBA4A_HUMAN		0	0	0	0	0	0	0	0	0	0	0	0	0	0	0	0	10400	0	0	0	0	0	0	0	0	0	0	0
KLRRELVAS	536.332	0.05	60	9.9	10.84			1100	0	2050	0	0	1830	0	0	0	0	0	1820	1660	0	770	1220	0	0	0	0	0	0	0	0	0	0	0	0
Q(-17.03)KDSYVGDEAQSKRGILT	659.998	0.03	60	5.6	6.12		Pyro-glu from Q	0	0	2490	0	2420	0	0	0	0	0	0	0	0	2010	0	0	3540	0	0	0	0	0	0	0	0	0	0	0
Q(-17.03)GVN(+.98)DN(+.98)EEGFF	1240.49	0.04	60	5.6	3.57	sp|P02675|FIBB_HUMAN	Pyro-glu from Q; Deamidation (NQ)	4860	0	0	0	0	0	0	0	0	0	1020	0	3270	0	1370	0	0	0	0	0	0	0	0	0	0	0	0	0
DAEGESDLENSRKLLS	588.286	0.03	60	4.7	4.18			0	0	2900	0	0	1570	0	0	0	0	0	0	0	0	0	0	6050	0	0	0	0	0	0	0	0	0	0	0
RSSNCSAQ(+.98)CHNHGV	375.895	0.06	60	6.4	8.09		Deamidation (NQ)	4740	0	0	3400	0	0	0	0	0	0	1480	0	940	0	0	0	0	0	0	0	0	0	0	0	0	0	0	0
SSCGCT	557.159	0.02	60	6.1	5.24			0	0	0	0	0	0	0	10600	0	0	0	0	0	0	0	0	0	0	0	0	0	0	0	0	0	0	0	0
RALQLVPDSKLLKENLAKLDRLEKRLQEVR	1191.39	0.01	60	5.2	9.98			0	0	0	0	0	0	0	1080	1560	0	0	0	0	2610	5370	0	0	0	0	0	0	0	0	0	0	0	0	0
HQ(+.98)FQ(+.98)EQDGESIPE	773.313	0.1	60	5.9	4		Deamidation (NQ)	0	0	3970	0	0	0	0	803	0	1010	2350	0	643	931	0	921	0	0	0	0	0	0	0	0	0	0	0	0
QRRWEDIFN(+.98)Q(+.98)HEE	894.893	0.01	60	10.6	4.83		Deamidation (NQ)	0	0	0	0	2530	0	0	0	547	0	0	0	0	0	3590	3980	0	0	0	0	0	0	0	0	0	0	0	0
ALAQ(+.98)PQ(+.98)YQSPQQPPQTRWVAPRN(+.98)RNAAFGQSGGAGSDSNSPGNVQPNS	1005.08	0.02	60	6.2	10.74		Deamidation (NQ)	0	0	0	0	0	0	0	0	0	0	0	0	0	3200	0	0	7470	0	0	0	0	0	0	0	0	0	0	0
EALTVSASSPGTPHHPQ(+.98)ASAGDPEPESEAEPEAEAGAG	917.899	0.01	60	5.5	3.98		Deamidation (NQ)	0	0	0	0	3160	0	0	0	0	865	0	4070	2590	0	0	0	0	0	0	0	0	0	0	0	0	0	0	0
EEEGEMYEDDEEE	544.839	0.01	60	8.4	3.21			8860	0	0	0	0	0	0	0	0	1830	0	0	0	0	0	0	0	0	0	0	0	0	0	0	0	0	0	0
KGPEEASSEVQ(+.98)DTNEVHVPGDQDEPQTLG	774.09	0.05	60	8.5	3.89		Deamidation (NQ)	2820	1670	0	1590	0	0	2630	0	0	0	0	0	0	0	2010	0	0	0	0	0	0	0	0	0	0	0	0	0
KSN(+.98)KLLLALVMLFLFAVIVLQ(+.98)YVCPGT	999.246	0.02	60	9	9.2		Deamidation (NQ)	4650	454	0	2690	0	0	946	0	0	429	0	1500	0	0	0	75.6	0	0	0	0	0	0	0	0	0	0	0	0
QLEAQ(+.98)CQEPCKDT	747.306	0.03	60	6.2	4.14		Deamidation (NQ)	0	0	3190	0	0	0	0	0	0	0	0	0	0	4130	3430	0	0	0	0	0	0	0	0	0	0	0	0	0
FTVKPK	360.222	0.09	60	3.8	10			0	0	2340	0	2410	4310	0	0	0	0	0	0	0	0	0	0	1720	0	0	0	0	0	0	0	0	0	0	0
RTFLKKKGGK	581.876	0.09	60	3.2	11.33			0	1850	0	0	0	0	1190	0	2350	967	1480	0	1930	0	1020	0	0	0	0	0	0	0	0	0	0	0	0	0
G(+42.01)LWLLLPSLSLLLFEVARAGRAVVS	908.217	0.02	60	10.8	9.6		Acetylation (Protein N-term)	0	741	0	0	1680	0	1460	1990	0	1160	84	0	169	652	0	2920	0	0	0	0	0	0	0	0	0	0	0	0
AGDSGT	507.193	0.02	60	6.5	3.8			0	0	0	0	0	0	2590	0	0	0	0	8270	0	0	0	0	0	0	0	0	0	0	0	0	0	0	0	0
PMNCPGHCLM(+15.99)FDH	759.268	0.17	60	5.4	5.99		Oxidation (M)	2270	300	0	625	0	0	1680	0	0	451	1080	2080	0	1370	1020	0	0	0	0	0	0	0	0	0	0	0	0	0
LQKLEEAEKAADESERGMKVIEN	655.079	0.02	60	7.1	4.55			0	0	0	0	0	0	0	2390	4230	2200	2090	0	0	0	0	0	0	0	0	0	0	0	0	0	0	0	0	0
KSFMSLTTPTQSEREMTDSTPVFTET	591.072	0.01	60	12.4	4.41			0	0	6700	0	0	0	0	0	0	0	0	0	0	4210	0	0	0	0	0	0	0	0	0	0	0	0	0	0
E(-18.01)GFEVTNVTAST	618.771	0.01	60	16.1	3.8		Pyro-glu from E	5960	0	0	0	0	0	0	0	0	0	0	4960	0	0	0	0	0	0	0	0	0	0	0	0	0	0	0	0
RTSKACFQ(+.98)VGTSEEM(+15.99)	564.245	0.01	60	8.1	6.14		Deamidation (NQ); Oxidation (M)	0	0	0	0	0	5820	0	0	0	0	0	0	0	0	0	0	5130	0	0	0	0	0	0	0	0	0	0	0
RILNLTERQVKIWFQ(+.98)NRR	1186.17	0.02	60	4.5	12		Deamidation (NQ)	0	1930	0	0	0	0	0	0	9050	0	0	0	0	0	0	0	0	0	0	0	0	0	0	0	0	0	0	0
DSNKEAQ(+.98)EDAEMDAE	561.531	0.02	60	4.5	3.66		Deamidation (NQ)	3910	0	0	0	0	0	886	0	0	0	6190	0	0	0	0	0	0	0	0	0	0	0	0	0	0	0	0	0
EPAAAATVQR	1013.54	0.02	60	0.4	6.1			2000	0	0	0	0	0	8990	0	0	0	0	0	0	0	0	0	0	0	0	0	0	0	0	0	0	0	0	0
SSTGQSSSHGQHGSGSSQ(+.98)SSSYGQ(+.98)Q(+.98)GSGSGQ	729.774	0.01	60	6	6.66		Deamidation (NQ)	0	0	0	0	0	0	0	0	9570	427	1010	0	0	0	0	0	0	0	0	0	0	0	0	0	0	0	0	0
VKDGPRAHAYK	621.343	0.05	60	8.8	9.7			0	0	0	0	2460	2990	0	3140	2450	0	0	0	0	0	0	0	0	0	0	0	0	0	0	0	0	0	0	0
DLN(+.98)GN(+.98)SVSDEQ(+.98)DEGV	395.907	0.04	60	7.9	3.33		Deamidation (NQ)	0	0	0	0	6290	4770	0	0	0	0	0	0	0	0	0	0	0	0	0	0	0	0	0	0	0	0	0	0
EETGDHSMDDSSEDGKM(+15.99)ETKSDH	646.497	0.02	60	6.7	4.16		Oxidation (M)	3380	0	0	0	0	0	665	0	2280	0	682	0	0	0	4090	0	0	0	0	0	0	0	0	0	0	0	0	0
LGPHK	551.328	0.01	60	8	8.76			0	0	11100	0	0	0	0	0	0	0	0	0	0	0	0	0	0	0	0	0	0	0	0	0	0	0	0	0
SVSENLLKEAIRAIFPSRGLARLALQFTTN(+.98)PKRLQQN	1046.11	0.01	60	18.2	11.55		Deamidation (NQ)	0	0	0	0	0	0	0	0	0	0	0	0	0	0	0	11100	0	0	0	0	0	0	0	0	0	0	0	0
EMPDFDVARISPWLLRVELDRKHMTDRKLTM(+15.99)EQIAEKINA	1203.66	0.03	60	5.9	5.66		Oxidation (M)	0	4140	0	0	0	0	0	0	4290	0	0	0	0	0	2680	0	0	0	0	0	0	0	0	0	0	0	0	0
M(+15.99)LSSLLAGKVQPSDQVGKVIYKQFKQIRLT	848.735	0.01	60	2.6	10.17		Oxidation (M)	0	3890	0	7240	0	0	0	0	0	0	0	0	0	0	0	0	0	0	0	0	0	0	0	0	0	0	0	0
LVEGEIAEEAAEKA	486.915	0.03	60	4.2	3.98			0	0	0	0	0	0	0	1190	1130	1570	1380	4530	0	1340	0	0	0	0	0	0	0	0	0	0	0	0	0	0
KSAGLPVPK	896.554	0.03	60	6.4	10			1070	683	2160	0	0	0	0	0	0	0	1050	0	0	0	0	0	6200	0	0	0	0	0	0	0	0	0	0	0
LPGNSCAQ(+.98)DPASF	654.258	0.13	60	5.1	3.8		Deamidation (NQ)	0	0	0	862	942	0	1440	0	0	0	748	0	710	0	900	4210	1380	0	0	0	0	0	0	0	0	0	0	0
DPEVMQK	423.706	0.05	60	2.7	4.37			0	0	0	3920	0	0	2200	0	1820	0	0	0	0	0	0	0	3270	0	0	0	0	0	0	0	0	0	0	0
LVRELMEEKKEEITG	601.986	0.04	60	12.4	4.65			0	0	0	0	0	0	0	0	0	0	0	2660	0	3300	0	0	5250	0	0	0	0	0	0	0	0	0	0	0
YNRGDSTFESKSYKMADEAGSEADHEGTH	644.678	0.03	60	14.5	4.69	sp|P02671|FIBA_HUMAN		0	0	0	0	6720	4490	0	0	0	0	0	0	0	0	0	0	0	0	0	0	0	0	0	0	0	0	0	0
LATKESLKKTIDRKSP	908.036	0.04	60	6.3	10	sp|Q8N3K9|CMYA5_HUMAN		2970	0	0	0	0	3340	3410	1500	0	0	0	0	0	0	0	0	0	0	0	0	0	0	0	0	0	0	0	0
SGQ(+.98)EGFGINEIGGNGM(+15.99)SGSVSAEAGFKGFGSDSSSSGD	897.63	0.07	60	5.9	3.83		Deamidation (NQ); Oxidation (M)	1230	0	0	1730	0	0	622	0	0	857	0	0	3390	0	0	3460	0	0	0	0	0	0	0	0	0	0	0	0
EGHSEESDTQ(+.98)SVSGHGQDGPHQQ(+.98)SHQ(+.98)	697.783	0.01	60	9.3	4.81		Deamidation (NQ)	0	0	0	0	0	0	0	0	0	0	0	0	0	0	0	8390	2900	0	0	0	0	0	0	0	0	0	0	0
KKIKN	630.435	0.06	60	5.9	10.3			0	0	1130	895	4190	1120	838	0	0	477	0	683	0	835	0	1140	0	0	0	0	0	0	0	0	0	0	0	0
AKAVLEEDEEVTEEAE	895.906	0.05	60	7	3.72			0	542	0	0	0	0	0	0	3460	0	1280	1790	0	0	1000	0	3250	0	0	0	0	0	0	0	0	0	0	0
SDIFGSCEDDPV	428.501	0.02	60	2.6	3.37			9310	0	0	2050	0	0	0	0	0	0	0	0	0	0	0	0	0	0	0	0	0	0	0	0	0	0	0	0
HPAGA	452.229	0.03	60	8	6.74			0	0	3160	0	0	0	0	0	0	1820	0	0	1940	0	1490	0	2960	0	0	0	0	0	0	0	0	0	0	0
QSSPSNCTVYCGGVTS	795.341	0.01	60	11.5	5.51			0	0	3090	0	2430	0	0	1050	1580	0	0	0	3240	0	0	0	0	0	0	0	0	0	0	0	0	0	0	0
GASSSSGCN(+.98)N(+.98)SSSGGSGR	390.902	0.02	60	0	8.25		Deamidation (NQ)	0	11400	0	0	0	0	0	0	0	0	0	0	0	0	0	0	0	0	0	0	0	0	0	0	0	0	0	0
KYPGEN(+.98)DQSFSGK	729.325	0.01	60	4.4	6.07		Deamidation (NQ)	7680	0	0	0	0	0	0	0	0	0	0	0	3740	0	0	0	0	0	0	0	0	0	0	0	0	0	0	0
TSQ(+.98)PM(+15.99)PPGVGTSTSHQPATPSGGTAQTPEPGT	770.361	0.01	60	9.5	5.21		Deamidation (NQ); Oxidation (M)	0	0	1230	2610	0	0	0	0	620	280	0	0	0	0	4900	0	1810	0	0	0	0	0	0	0	0	0	0	0
SQPNQKLGHPEALSAGTGSPQPPSFT	878.429	0.02	60	9.4	6.47	sp|Q15942|ZYX_HUMAN		0	0	4140	0	3450	3960	0	0	0	0	0	0	0	0	0	0	0	0	0	0	0	0	0	0	0	0	0	0
VASALPPGGAKG	512.797	0.03	60	2.1	8.72			0	0	0	0	0	0	0	0	0	0	0	0	0	0	0	11600	0	0	0	0	0	0	0	0	0	0	0	0
KVKIHGI	397.772	0.01	60	14.8	10			0	0	8870	0	0	0	1920	0	0	0	818	0	0	0	0	0	0	0	0	0	0	0	0	0	0	0	0	0
SSSGQ(+.98)SSGYSQHGSGSGH	565.552	0.03	60	5.1	6.66		Deamidation (NQ)	0	0	7670	0	1990	0	0	1960	0	0	0	0	0	0	0	0	0	0	0	0	0	0	0	0	0	0	0	0
VNGGPLPPVPRHT	670.893	0.01	60	13	9.73			0	0	0	0	0	0	0	0	4460	0	0	0	0	0	0	0	7180	0	0	0	0	0	0	0	0	0	0	0
KEYVCPAPHSEPPSCN(+.98)AN(+.98)SISCPSPCT	564.831	0.02	60	12	5.4		Deamidation (NQ)	0	0	0	0	0	6780	0	0	0	0	0	1600	1490	449	0	1340	0	0	0	0	0	0	0	0	0	0	0	0
KTKEGVLYVGSKTKEGVVHGVATVAE	538.1	0.08	60	2.9	8.39			0	0	0	0	0	0	0	1880	0	0	0	2840	0	1820	2220	0	2900	0	0	0	0	0	0	0	0	0	0	0
AGEGQTAMVTFRTGRRPKPEIMASKEQ(+.98)Q(+.98)IQ(+.98)RDDPGASPQSSSQPDHG	1014.27	0.02	60	14.6	6.82		Deamidation (NQ)	10100	0	0	0	0	0	0	1560	0	0	0	0	0	0	0	0	0	0	0	0	0	0	0	0	0	0	0	0
ESRGSESGIFTNTKESSSHHPGIAEFPSRG	638.507	0.03	60	4.7	6.05	sp|P02671|FIBA_HUMAN		0	0	5290	0	0	5260	0	0	0	0	0	1140	0	0	0	0	0	0	0	0	0	0	0	0	0	0	0	0
SDMRQEKPSSPSPMPSSTPSPSLN	848.72	0.01	60	10.8	5.79			0	0	0	0	0	0	0	0	1900	1640	0	8180	0	0	0	0	0	0	0	0	0	0	0	0	0	0	0	0
KDEEEMSGEEDEEQET	479.182	0.13	60	2.2	3.59			0	0	1880	0	0	3570	0	0	491	0	0	0	0	1320	0	1960	2500	0	0	0	0	0	0	0	0	0	0	0
Q(-17.03)EKKAQ(+.98)LKIYKKFLKKAQDL	1216.74	0.02	60	10.8	10	sp|Q8WXH0|SYNE2_HUMAN	Pyro-glu from Q; Deamidation (NQ)	0	0	0	0	1330	2420	0	2780	0	0	3220	0	0	1090	890	0	0	0	0	0	0	0	0	0	0	0	0	0
LLLVLVLG	420.301	0.04	60	8.3	5.52	sp|P25067|CO8A2_HUMAN		0	0	0	0	4300	0	0	4550	0	0	0	0	2950	0	0	0	0	0	0	0	0	0	0	0	0	0	0	0
LVN(+.98)AALEGKLVLLDGIHRVNAGTLAVLQRLI	1094.33	0.03	60	12.9	8.75	sp|A3KMH1|VWA8_HUMAN	Deamidation (NQ)	0	733	1470	3460	195	0	0	559	1170	619	0	2550	386	760	0	0	0	0	0	0	0	0	0	0	0	0	0	0
PKNGN(+.98)TNSLN(+.98)LSSPNPM(+15.99)ENKGMPFGM	932.085	0.03	60	5.7	9.01		Deamidation (NQ); Oxidation (M)	0	0	0	0	0	0	0	2340	4720	0	0	4850	0	0	0	0	0	0	0	0	0	0	0	0	0	0	0	0
QDSDHPPSHDTQ(+.98)PGEHQKTHTDSKSY	987.428	0.01	60	7.2	5.6		Deamidation (NQ)	8500	0	0	623	0	0	0	0	0	0	0	0	2820	0	0	0	0	0	0	0	0	0	0	0	0	0	0	0
SSLVKNAIQ	480.284	0.04	60	12.7	8.47			0	0	1220	0	0	2450	0	2340	0	0	0	1560	0	1660	0	2740	0	0	0	0	0	0	0	0	0	0	0	0
TLRKDKTLLRDEKKMEKL	562.081	0.06	60	5.1	9.82			0	0	2970	0	0	0	0	0	0	779	695	3720	0	1440	2370	0	0	0	0	0	0	0	0	0	0	0	0	0
TVAEKTKEQVTNVGGAVVTGVT	730.062	0.01	60	5.2	5.81			0	0	2750	0	0	0	0	2310	3450	434	1300	0	1750	0	0	0	0	0	0	0	0	0	0	0	0	0	0	0
KVMKK	633.42	0.03	60	8.5	10.3			0	0	0	0	0	0	2230	3820	0	2350	0	0	0	3600	0	0	0	0	0	0	0	0	0	0	0	0	0	0
KAPEPHVEEDDDDELDSKLNY	615.278	0.02	60	4.1	3.97	sp|P52566|GDIR2_HUMAN		0	0	2340	0	0	0	0	0	1540	0	0	3730	0	1330	0	0	3060	0	0	0	0	0	0	0	0	0	0	0
QFGKK	607.361	0.06	60	6.6	10			0	398	0	0	0	5280	566	0	0	0	0	683	799	0	1050	1930	1350	0	0	0	0	0	0	0	0	0	0	0
KSIFPYSVSLPQSCSIL	623.667	0.03	60	4.8	8.2			0	0	2820	0	0	0	1090	0	0	0	0	0	2290	0	2150	3720	0	0	0	0	0	0	0	0	0	0	0	0
M(+15.99)LGEFVSETESRGSESGIFTNTKESSSHHPGIAEFPSRG	840.386	0.01	60	7	5.06	sp|P02671|FIBA_HUMAN	Oxidation (M)	0	0	0	0	0	0	0	12100	0	0	0	0	0	0	0	0	0	0	0	0	0	0	0	0	0	0	0	0
Q(-17.03)LITGKEDAANNY	710.338	0.01	60	9.1	4.37	sp|P68366|TBA4A_HUMAN	Pyro-glu from Q	0	0	0	0	0	0	0	1420	0	0	0	3740	0	0	0	0	6980	0	0	0	0	0	0	0	0	0	0	0
M(+15.99)ENIKKAGFQ	591.313	0.04	60	7.1	8.35		Oxidation (M)	0	0	2250	0	3080	2970	0	0	0	0	2580	0	0	0	1290	0	0	0	0	0	0	0	0	0	0	0	0	0
KERELEEARKKLAQIRQ	532.057	0.01	60	5.9	9.69			1190	0	2640	0	1330	0	0	0	0	0	735	4750	0	0	1540	0	0	0	0	0	0	0	0	0	0	0	0	0
AMKLK	590.37	0.04	60	9.8	10			0	4240	0	0	0	0	0	0	0	0	5520	0	2430	0	0	0	0	0	0	0	0	0	0	0	0	0	0	0
PLILQLVHV	516.353	0.02	60	9	7.17			6130	4570	0	329	0	0	0	0	0	0	0	0	0	0	1200	0	0	0	0	0	0	0	0	0	0	0	0	0
QTQETVKPVILLIPQKRTPTGV	816.146	0.01	60	7.5	9.99			0	0	0	0	0	4260	0	0	2790	0	1110	0	0	0	0	4080	0	0	0	0	0	0	0	0	0	0	0	0
GNPQLDSKFSNQGKQ(+.98)GGSASQSQPSP	878.068	0.01	60	7.6	8.59		Deamidation (NQ)	0	0	367	0	0	0	1740	0	0	4060	2610	3470	0	0	0	0	0	0	0	0	0	0	0	0	0	0	0	0
GAVEGKEELPDENKSLE	615.3	0.01	60	3	4.14			0	0	0	0	11900	0	0	0	0	377	0	0	0	0	0	0	0	0	0	0	0	0	0	0	0	0	0	0
LPPLRIP	403.273	0.03	60	9.7	9.75			1110	3390	0	0	0	0	0	0	0	0	4090	2160	0	1570	0	0	0	0	0	0	0	0	0	0	0	0	0	0
D(+42.01)DDIAALVVDNG	629.79	0.04	60	1.6	3.32		Acetylation (Protein N-term)	0	0	3400	0	0	2790	0	0	0	0	0	0	0	0	0	0	6180	0	0	0	0	0	0	0	0	0	0	0
KIVGA	487.329	0.02	60	6.3	8.75			0	217	0	1870	0	0	0	0	6670	0	0	0	0	3630	0	0	0	0	0	0	0	0	0	0	0	0	0	0
M(+42.01)PAGGR	630.301	0.04	60	1.8	9.5		Acetylation (Protein N-term)	0	0	0	1950	0	0	0	6630	3820	0	0	0	0	0	0	0	0	0	0	0	0	0	0	0	0	0	0	0
Q(-17.03)EGQ(+.98)MIISLPES	658.306	0.04	60	7.9	3.79		Pyro-glu from Q; Deamidation (NQ)	0	0	2550	0	0	0	0	0	0	1640	0	0	3270	0	0	0	5020	0	0	0	0	0	0	0	0	0	0	0
AGDYSM(+15.99)RVDLRAGDEAVFAQ(+.98)YDSFHVDSA	1070.44	0.14	60	8.7	4.17	sp|P22105|TENX_HUMAN	Oxidation (M); Deamidation (NQ)	0	0	0	1530	0	5050	1560	0	0	0	0	0	2390	0	0	1970	0	0	0	0	0	0	0	0	0	0	0	0
TGEAEDCHSDP	580.705	0.03	60	7.4	3.91			0	0	0	6480	0	0	1850	0	0	0	0	0	0	0	4230	0	0	0	0	0	0	0	0	0	0	0	0	0
QSQDAHQ(+.98)MTMDDSENN(+.98)FQ(+.98)NITE	862.655	0.02	60	10.5	3.77		Deamidation (NQ)	0	0	0	0	0	0	0	0	3480	1010	8070	0	0	0	0	0	0	0	0	0	0	0	0	0	0	0	0	0
ENQ(+.98)KTDVLCADEEEDCQAAS	1099.94	0.04	60	9	3.66		Deamidation (NQ)	0	0	3160	0	9420	0	0	0	0	0	0	0	0	0	0	0	0	0	0	0	0	0	0	0	0	0	0	0
TGDQIRGCKAERN(+.98)CRNPELNPCSVNAQCIEERQGDVT	821.769	0.01	60	0.1	5.05		Deamidation (NQ)	0	0	0	0	0	0	0	7600	5000	0	0	0	0	0	0	0	0	0	0	0	0	0	0	0	0	0	0	0
IFKAMLPLFHIALLVLFM(+15.99)VIIYAIIGLELF	1160.04	0.01	60	13.1	6.75		Oxidation (M)	0	1200	0	900	0	0	4480	0	2020	1650	2370	0	0	0	0	0	0	0	0	0	0	0	0	0	0	0	0	0
ESKSYKMADEAGSEADHEGTHSTKRGHAKSRPV	717.542	0.08	60	8	7.12	sp|P02671|FIBA_HUMAN		0	0	1560	0	3610	3100	0	0	0	0	0	0	0	0	0	4360	0	0	0	0	0	0	0	0	0	0	0	0
EQQVLQQ(+.98)QEQLQQQVQEQ(+.98)QLLQ(+.98)Q	571.299	0.04	60	4.6	3.67		Deamidation (NQ)	0	0	0	0	0	0	0	3050	2610	2860	2000	0	0	2130	0	0	0	0	0	0	0	0	0	0	0	0	0	0
QFGN(+.98)N(+.98)PFSSLAGNSDSSSS	635.595	0.08	60	6.9	3.8		Deamidation (NQ)	2680	0	2060	0	0	1610	0	0	824	1290	1150	0	0	1490	0	0	1570	0	0	0	0	0	0	0	0	0	0	0
ALTDMPQMRMELERPGGNEIT	797.05	0.04	60	4.3	4.41	sp|P02671|FIBA_HUMAN		12700	0	0	0	0	0	0	0	0	0	0	0	0	0	0	0	0	0	0	0	0	0	0	0	0	0	0	0
KMATGNYFGFTHSGAAAAAAAAQ(+.98)YSQ(+.98)QPAS	993.114	0.02	60	7.5	8.5		Deamidation (NQ)	0	12700	0	0	0	0	0	0	0	0	0	0	0	0	0	0	0	0	0	0	0	0	0	0	0	0	0	0
N(+.98)DNEEGFFSA	565.716	0.2	60	4.3	3.57	sp|P02675|FIBB_HUMAN	Deamidation (NQ)	5030	0	0	2430	0	0	0	0	0	1540	0	2380	1370	0	0	0	0	0	0	0	0	0	0	0	0	0	0	0
SLDRNLPSDSQDLGQHG	613.622	0.02	60	10.1	4.41			0	0	0	0	2070	10700	0	0	0	0	0	0	0	0	0	0	0	0	0	0	0	0	0	0	0	0	0	0
KKICTRK	438.777	0.03	60	7.1	10.32	sp|Q13255|GRM1_HUMAN		0	0	2950	0	0	2740	0	0	0	0	841	2390	0	0	0	0	3860	0	0	0	0	0	0	0	0	0	0	0
GKGSQ(+.98)DHSGDPTSGD	482.52	0.08	60	5.9	4.41		Deamidation (NQ)	0	1970	0	0	0	0	7890	0	0	1640	1310	0	0	0	0	0	0	0	0	0	0	0	0	0	0	0	0	0
LCDLQ(+.98)AQECPDQAGH	814.827	0.04	60	9.9	4.02		Deamidation (NQ)	0	0	0	0	0	0	8530	0	0	0	0	0	0	2270	2020	0	0	0	0	0	0	0	0	0	0	0	0	0
CM(+15.99)AGVLGAKEGETCGAEDNDSCGIS	608.994	0.06	60	6.3	3.83		Oxidation (M)	0	0	0	0	0	792	0	2070	0	0	0	0	1630	1710	0	6680	0	0	0	0	0	0	0	0	0	0	0	0
GSLRPPIVI	476.305	0.03	60	9.5	9.75			1690	0	0	2910	0	291	0	0	0	1150	2730	0	107	2570	0	1440	0	0	0	0	0	0	0	0	0	0	0	0
DASQLLHQAEVAQQ	769.39	0.04	60	3.9	4.35	sp|Q9UPN3|MACF1_HUMAN		0	0	0	0	0	0	12900	0	0	0	0	0	0	0	0	0	0	0	0	0	0	0	0	0	0	0	0	0
SCQ(+.98)QEM(+15.99)M(+15.99)DV	552.182	0.28	60	3.5	3.67		Deamidation (NQ); Oxidation (M)	3780	0	0	1480	0	0	856	0	0	67.5	1280	0	0	2700	2740	0	0	0	0	0	0	0	0	0	0	0	0	0
RAFLS	593.347	0.06	60	4.7	9.75			0	0	3080	1420	0	2660	0	1970	0	1260	1640	0	891	0	0	0	0	0	0	0	0	0	0	0	0	0	0	0
TPENLRLKQQSELQ	561.969	0.05	60	6	5.81			0	0	2530	0	2740	0	0	0	0	0	0	1760	0	0	0	5900	0	0	0	0	0	0	0	0	0	0	0	0
KITHRIHWESASLL	564.31	0.03	60	4.5	8.76	sp|P01024|CO3_HUMAN		0	3040	2620	0	1180	2640	0	1740	0	0	0	0	589	1150	0	0	0	0	0	0	0	0	0	0	0	0	0	0
LPVATRAVLITG	605.874	0.06	60	5.8	9.75			0	0	0	0	2610	0	0	0	0	2270	0	3280	0	923	2040	0	1840	0	0	0	0	0	0	0	0	0	0	0
ARALLRQ(+.98)IQVSRRRSLGVRRPLQEHV	1032.63	0.01	60	7.2	12.4		Deamidation (NQ)	540	187	0	0	0	0	0	0	0	0	0	0	0	10200	2130	0	0	0	0	0	0	0	0	0	0	0	0	0
SRPGGRASVDTKEAEGAPQVE	536.019	0.15	60	2.4	4.87			0	616	0	0	0	0	0	0	0	1700	1390	5010	0	1430	0	0	2950	0	0	0	0	0	0	0	0	0	0	0
KN(+.98)GECT	652.259	0.02	60	4.4	5.99		Deamidation (NQ)	2980	0	0	0	6080	0	4080	0	0	0	0	0	0	0	0	0	0	0	0	0	0	0	0	0	0	0	0	0
L(+42.01)LPPK	609.384	0.05	60	10.8	8.75		Acetylation (Protein N-term)	0	0	0	0	0	0	5100	407	0	0	0	0	0	3790	3880	0	0	0	0	0	0	0	0	0	0	0	0	0
ICQNTPGSFTCECQRGFSLDQTGSSCE	725.298	0.04	60	4.8	4.14			0	1880	0	0	0	0	0	0	1060	2250	1320	2730	0	0	0	0	4030	0	0	0	0	0	0	0	0	0	0	0
VLVFAIQKSD	560.323	0.01	60	5.4	5.81			0	0	0	0	0	0	0	0	0	0	0	0	0	0	0	0	13300	0	0	0	0	0	0	0	0	0	0	0
KKSIVRLVRN(+.98)LS	707.439	0.08	60	6.9	12.02		Deamidation (NQ)	0	1020	4390	0	0	0	0	2860	2800	0	0	0	0	0	0	2260	0	0	0	0	0	0	0	0	0	0	0	0
KPKTKSVLK	514.843	0.03	60	5.1	10.48			427	0	0	3410	0	0	0	0	0	0	7600	0	0	0	1900	0	0	0	0	0	0	0	0	0	0	0	0	0
YSKQFTSSTSYNRGDSTFESKS	627.533	0.02	60	9.6	8.43	sp|P02671|FIBA_HUMAN		7770	0	0	2430	0	0	0	0	0	0	0	0	0	3170	0	0	0	0	0	0	0	0	0	0	0	0	0	0
GENVQ(+.98)M(+15.99)NGDTPHDGGHGGGG	955.384	0.06	60	9.6	4.52		Deamidation (NQ); Oxidation (M)	1700	0	991	0	0	0	0	0	0	0	0	0	0	0	0	7490	3190	0	0	0	0	0	0	0	0	0	0	0
SPRIQAKPKPKPN	487.637	0.02	60	4.4	11.26			0	0	0	0	0	0	0	13400	0	0	0	0	0	0	0	0	0	0	0	0	0	0	0	0	0	0	0	0
LLLLLP	681.506	0.01	60	0	5.52			0	0	0	0	13400	0	0	0	0	0	0	0	0	0	0	0	0	0	0	0	0	0	0	0	0	0	0	0
SRGSYGGGDGGYN(+.98)GFGGDGGNYGGGPGYS	662.511	0.03	60	13.4	4.21		Deamidation (NQ)	4690	446	0	0	3160	0	1450	0	0	0	0	0	0	0	0	3730	0	0	0	0	0	0	0	0	0	0	0	0
EGDGGRTSDT	994.406	0.01	60	8.8	4.03			0	0	0	0	0	0	0	0	1480	0	0	12000	0	0	0	0	0	0	0	0	0	0	0	0	0	0	0	0
QLGLPGPPDVPDHAAYHPFR	546.779	0.03	60	2.5	5.98			0	0	0	0	0	0	0	13500	0	0	0	0	0	0	0	0	0	0	0	0	0	0	0	0	0	0	0	0
VPSPKVSDTVVEPYN	815.923	0.05	60	7.9	4.37			0	0	0	0	956	3380	0	0	0	0	0	0	0	3530	0	0	5760	0	0	0	0	0	0	0	0	0	0	0
SIYPAPQVSTAVVEPYN	917.957	0.04	60	4.5	4	sp|P68366|TBA4A_HUMAN		0	4240	0	0	0	0	0	0	0	0	0	0	0	0	3130	0	6260	0	0	0	0	0	0	0	0	0	0	0
Q(+.98)VHIQAAAAESTAFQ(+.98)RENKLA	762.388	0.02	60	4.5	6.76		Deamidation (NQ)	13700	0	0	0	0	0	0	0	0	0	0	0	0	0	0	0	0	0	0	0	0	0	0	0	0	0	0	0
G(+42.01)GSSGGCGT	724.242	0.01	60	6.4	5.52		Acetylation (Protein N-term)	11400	0	0	0	0	0	0	0	0	0	0	0	0	2430	0	0	0	0	0	0	0	0	0	0	0	0	0	0
QQDFLAEAELL	638.815	0.01	60	8.3	3.57			11600	0	0	0	0	0	821	0	0	0	0	0	0	0	1420	0	0	0	0	0	0	0	0	0	0	0	0	0
VVGQQEGPADQVAADVKSGN(+.98)YTVL	1223.61	0.09	60	1.7	4.03		Deamidation (NQ)	0	0	0	0	0	0	0	0	0	0	0	0	0	0	0	4580	9300	0	0	0	0	0	0	0	0	0	0	0
CQ(+.98)ECGVR	795.305	0.03	60	3.6	5.99		Deamidation (NQ)	0	0	0	0	0	0	13900	0	0	0	0	0	0	0	0	0	0	0	0	0	0	0	0	0	0	0	0	0
HISEELTTTTE	630.799	0.06	60	3.3	4.24			0	0	0	0	0	0	0	0	919	0	1080	4140	0	2370	522	0	4880	0	0	0	0	0	0	0	0	0	0	0
AGAASPCAN(+.98)GCGPGAPS	463.53	0.03	60	1.8	5.55		Deamidation (NQ)	0	0	0	0	0	0	11900	0	0	0	2030	0	0	0	0	0	0	0	0	0	0	0	0	0	0	0	0	0
KEISSILKELRRVQ(+.98)KQLEVINAI	903.549	0.03	60	5.5	9.7		Deamidation (NQ)	5400	0	0	0	0	5080	0	0	0	0	0	1480	1980	0	0	0	0	0	0	0	0	0	0	0	0	0	0	0
GKSSSYSKQFTSSTSYNRGDSTFESKS	591.476	0.05	60	4.5	9.4	sp|P02671|FIBA_HUMAN		0	0	0	0	11300	0	2650	0	0	0	0	0	0	0	0	0	0	0	0	0	0	0	0	0	0	0	0	0
TSSTSYNRGDSTFESKSYKM	569.758	0.07	60	6.3	8.1	sp|P02671|FIBA_HUMAN		6600	0	0	3050	0	0	0	0	0	0	0	1630	0	1540	1150	0	0	0	0	0	0	0	0	0	0	0	0	0
VCLQ(+.98)Q(+.98)WDGFTCDCTM(+15.99)TSYGGPVCNDPGTT	1039.74	0.08	60	10.4	3.42		Deamidation (NQ); Oxidation (M)	6580	0	0	0	0	0	0	0	0	0	2430	4980	0	0	0	0	0	0	0	0	0	0	0	0	0	0	0	0
TGTSGQLAG	791.401	0.01	60	0.8	5.19			0	0	0	0	0	0	14000	0	0	0	0	0	0	0	0	0	0	0	0	0	0	0	0	0	0	0	0	0
LEGQEEEEDNRDSSMKLSFRA	618.282	0.04	60	7.6	4.25			0	1020	1280	1910	0	0	0	0	0	0	1290	0	0	2040	2070	1880	2530	0	0	0	0	0	0	0	0	0	0	0
E(-18.01)IPGEFTQDDLAEDDVM(+15.99)LLD	754.995	0.02	60	3.3	3.16		Pyro-glu from E; Oxidation (M)	0	0	5940	0	0	0	0	7240	891	0	0	0	0	0	0	0	0	0	0	0	0	0	0	0	0	0	0	0
KPMNVGLSETQNGGM(+15.99)SQ(+.98)EAVGNI	595.266	0.1	60	4.9	4.53		Oxidation (M); Deamidation (NQ)	0	0	1900	0	0	0	0	0	1610	879	0	2410	1040	2160	0	0	4100	0	0	0	0	0	0	0	0	0	0	0
QGIGIPGRTGAQGPAGEPGIQ(+.98)GPR	568.789	0.05	60	4.5	9.6		Deamidation (NQ)	0	0	2380	0	4150	5620	0	0	0	0	0	0	0	0	0	1980	0	0	0	0	0	0	0	0	0	0	0	0
KERELEEARKKLAQIRQQQ	596.086	0.03	60	3	9.69			0	0	6380	0	0	3390	0	0	0	0	0	0	0	0	0	0	4390	0	0	0	0	0	0	0	0	0	0	0
HRHPDEAAFFDTASTGK	472.476	0.05	60	3.2	6	sp|P02671|FIBA_HUMAN		3890	2200	0	0	0	0	7080	0	0	999	0	0	0	0	0	0	0	0	0	0	0	0	0	0	0	0	0	0
EIVHIQIGQ	518.792	0.02	60	1.4	5.24			0	0	0	0	0	0	0	0	0	1030	1450	3410	1270	0	0	0	7030	0	0	0	0	0	0	0	0	0	0	0
PCGGGS	477.174	0.03	60	1.8	5.91			3000	0	0	0	0	0	0	0	0	0	0	0	0	0	11200	0	0	0	0	0	0	0	0	0	0	0	0	0
GSEMVVAGKLQ	559.797	0.08	60	5.4	6			7410	919	0	0	0	2080	0	0	0	0	0	0	0	0	0	3810	0	0	0	0	0	0	0	0	0	0	0	0
KDKLN(+.98)LEEDKNQ(+.98)LQ	572.95	0.01	60	7.7	4.78		Deamidation (NQ)	0	0	1440	0	2820	0	0	0	0	0	0	0	0	2460	0	4200	3300	0	0	0	0	0	0	0	0	0	0	0
STSASRTSEAGFCN(+.98)Q(+.98)PPSAWSSHPPT	673.799	0.02	60	7.3	6.46		Deamidation (NQ)	1490	4100	0	0	0	0	0	0	1890	2630	1240	0	0	1630	0	0	1300	0	0	0	0	0	0	0	0	0	0	0
NSCPP	517.207	0.06	60	2.6	5.52			0	0	0	862	0	3980	0	4310	2010	0	0	0	0	0	0	3180	0	0	0	0	0	0	0	0	0	0	0	0
EEKKEKKAKA	594.859	0.01	60	6.6	9.41			0	0	0	0	0	0	0	0	0	0	0	0	0	9440	0	4930	0	0	0	0	0	0	0	0	0	0	0	0
EFRDPLM(+15.99)DTLM(+15.99)T	750.837	0.04	60	2.5	4.03		Oxidation (M)	6380	0	0	2490	0	0	2480	0	0	0	0	0	0	0	3040	0	0	0	0	0	0	0	0	0	0	0	0	0
GQM(+15.99)PNSSMQDMYN(+.98)QSPSGAMSN(+.98)LGMGQ	956.053	0.04	60	8	3.8		Oxidation (M); Deamidation (NQ)	3280	0	0	0	0	0	0	4590	0	0	0	1940	4620	0	0	0	0	0	0	0	0	0	0	0	0	0	0	0
QVLVKTSPRPSEKKAPLLDFSILK	674.411	0.01	60	3.5	10			0	13300	0	0	0	0	0	0	0	1150	0	0	0	0	0	0	0	0	0	0	0	0	0	0	0	0	0	0
KQFTSSTSYNRGDSTFESKSYKMA	550.861	0.02	60	9.5	9.4	sp|P02671|FIBA_HUMAN		5880	0	0	1090	2440	0	983	0	0	0	0	0	0	4080	0	0	0	0	0	0	0	0	0	0	0	0	0	0
AGTSGTEQATVTMVSSEDI	942.424	0.05	60	6.6	3.57			3880	0	0	0	0	0	0	0	0	0	0	2410	3970	0	867	3350	0	0	0	0	0	0	0	0	0	0	0	0
QN(+.98)LNEDVSQEESPSLIAGN(+.98)PQGPSP	653.039	0.05	60	5.7	3.5		Deamidation (NQ)	0	0	3270	0	0	0	0	0	0	1310	2810	2920	2160	0	2020	0	0	0	0	0	0	0	0	0	0	0	0	0
SSSSSSREEHAFCANLGPVQSSSSSEG	905.376	0.04	60	10.2	4.75			0	5870	6550	0	0	0	2130	0	0	0	0	0	0	0	0	0	0	0	0	0	0	0	0	0	0	0	0	0
CSSASSSSS	401.652	0.01	60	0.4	5.52			10100	0	0	0	0	0	0	0	0	0	0	4450	0	0	0	0	0	0	0	0	0	0	0	0	0	0	0	0
QKPRNIKGKQ	1196.72	0.03	60	7.4	11.26			340	0	1190	2570	0	0	148	0	1070	1800	1060	4280	417	0	0	301	1380	0	0	0	0	0	0	0	0	0	0	0
Q(-17.03)NQPNGLFPDVSDGSPM(+15.99)WGHQ(+.98)TATT	895.727	0.04	60	8.5	4.2		Pyro-glu from Q; Oxidation (M); Deamidation (NQ)	0	4100	0	0	0	0	0	0	449	0	0	0	1050	4350	0	0	4610	0	0	0	0	0	0	0	0	0	0	0
Q(-17.03)LGLPGPPDVPDH	662.829	0.05	60	3.4	4.2		Pyro-glu from Q	0	0	3010	0	0	7540	0	4020	0	0	0	0	0	0	0	0	0	0	0	0	0	0	0	0	0	0	0	0
NRGDSTFESKSYKMA	574.267	0.07	60	5.5	8.5	sp|P02671|FIBA_HUMAN		3720	441	0	2020	0	0	862	0	0	0	1820	1860	624	3240	0	0	0	0	0	0	0	0	0	0	0	0	0	0
E(-18.01)Q(+.98)DMDSMTDSM(+15.99)AS	723.741	0.03	60	8.3	3.37		Pyro-glu from E; Deamidation (NQ); Oxidation (M)	286	0	0	2110	0	0	0	0	0	2230	2350	2250	2200	2360	483	393	0	0	0	0	0	0	0	0	0	0	0	0
FGPVVAPKPK	520.328	0.02	60	10.7	10	sp|Q15942|ZYX_HUMAN		0	0	0	0	0	10700	0	0	0	1330	2700	0	0	0	0	0	0	0	0	0	0	0	0	0	0	0	0	0
TPAGK	473.271	0.11	60	3	8.41			1270	2020	0	0	0	0	4580	6880	0	0	0	0	0	0	0	0	0	0	0	0	0	0	0	0	0	0	0	0
NLLLGV	628.4	0.01	60	6.3	5.52			0	0	0	0	0	11300	0	0	0	0	0	0	0	0	0	993	2510	0	0	0	0	0	0	0	0	0	0	0
PSLM(+15.99)TM(+15.99)CQ(+.98)DSNQN	501.192	0.11	60	4.4	3.8		Oxidation (M); Deamidation (NQ)	6310	0	0	4060	0	0	0	0	0	1080	0	0	1460	0	1970	0	0	0	0	0	0	0	0	0	0	0	0	0
NLARLIIVK	520.34	0.08	60	11.7	11			1150	2290	0	0	0	0	0	0	0	244	1710	1180	0	4150	0	641	3520	0	0	0	0	0	0	0	0	0	0	0
MPKVIKKTR	550.864	0.05	60	11.6	11.26			827	0	0	0	31.9	0	1990	0	0	781	0	3160	5360	0	0	0	2740	0	0	0	0	0	0	0	0	0	0	0
GNPCSHSCHN(+.98)AM(+15.99)GT	716.736	0.24	60	7.6	6.9		Deamidation (NQ); Oxidation (M)	815	662	0	1680	0	0	1490	952	0	1720	0	672	1830	1520	1170	1100	1310	0	0	0	0	0	0	0	0	0	0	0
QQAHWPEHMKSCTQ(+.98)SATAPQ(+.98)Q(+.98)EA	650.018	0.06	60	7.1	6		Deamidation (NQ)	0	0	0	2340	0	0	0	0	1180	0	0	2360	0	4140	881	4020	0	0	0	0	0	0	0	0	0	0	0	0
EQMPNDQEEESFAEGHSE	698.274	0.04	60	11.6	3.77			0	0	1830	0	3070	1890	0	0	0	0	0	0	0	1660	0	0	6500	0	0	0	0	0	0	0	0	0	0	0
QQKQ(+.98)Q(+.98)QEQ(+.98)QQ	652.276	0.01	60	7.9	6		Deamidation (NQ)	0	0	3780	0	10600	0	0	582	0	0	0	0	0	0	0	0	0	0	0	0	0	0	0	0	0	0	0	0
VEESEAEASG	504.212	0.03	60	8.3	3.58			11100	0	0	0	1270	0	0	0	0	0	0	2620	0	0	0	0	0	0	0	0	0	0	0	0	0	0	0	0
ASALVEGEIAEEAAEKAT	894.939	0.03	60	6.6	3.98			0	6290	0	3460	0	0	0	0	0	0	0	3680	0	1640	0	0	0	0	0	0	0	0	0	0	0	0	0	0
EDGQ(+.98)WAEQ(+.98)PVT	631.251	0.01	60	5.7	3.57		Deamidation (NQ)	1130	0	0	0	0	0	0	0	0	13300	0	698	0	0	0	0	0	0	0	0	0	0	0	0	0	0	0	0
REAVSGRYSLFCLGF	568.949	0.05	60	2.4	8.22			0	0	2180	0	4990	3010	0	0	0	0	0	0	0	886	0	0	4120	0	0	0	0	0	0	0	0	0	0	0
VSPPHTSMAPAQDEERDSGKEQGHT	897.723	0.03	60	6.8	4.86			3790	0	0	1580	407	0	0	0	1830	0	0	0	0	5050	0	0	2560	0	0	0	0	0	0	0	0	0	0	0
ALVEGEIAEEAAEKA	765.38	0.01	60	11.9	3.98			0	0	0	0	0	0	0	0	5500	0	0	3770	0	6020	0	0	0	0	0	0	0	0	0	0	0	0	0	0
YKMADEAGSEADHEGTHSTKRGHAKSRPV	631.303	0.05	60	4	7.03	sp|P02671|FIBA_HUMAN		2640	0	2240	0	4850	2500	0	2070	0	0	0	0	0	0	0	1020	0	0	0	0	0	0	0	0	0	0	0	0
LSGEEEDDEPDCCND	557.19	0.01	60	0	3.19			15400	0	0	0	0	0	0	0	0	0	0	0	0	0	0	0	0	0	0	0	0	0	0	0	0	0	0	0
SQ(+.98)KITLAKPAPQTLTGLVSALTGLVNV	907.867	0.02	60	7.5	10		Deamidation (NQ)	0	0	0	0	0	0	768	1550	0	0	0	0	2320	0	0	10800	0	0	0	0	0	0	0	0	0	0	0	0
LSKKRKFPK	566.375	0.09	60	4	11.33			2450	0	2190	0	2530	1570	0	0	0	1170	0	1960	0	0	1190	1420	1100	0	0	0	0	0	0	0	0	0	0	0
GFVTLGRLAK	531.336	0.06	60	5.1	11			1980	3920	0	0	0	3080	0	0	0	0	0	2380	0	0	2610	1710	0	0	0	0	0	0	0	0	0	0	0	0
E(-18.01)GDFLAEGGGV	516.732	0.07	60	4.3	3.57	sp|P02671|FIBA_HUMAN	Pyro-glu from E	1290	0	0	0	0	0	0	0	0	723	0	2710	3080	0	3660	4240	0	0	0	0	0	0	0	0	0	0	0	0
AAAQSGTP	702.354	0.01	60	13.1	5.57			0	0	4720	0	0	0	0	0	0	0	0	4810	0	0	0	0	6180	0	0	0	0	0	0	0	0	0	0	0
P(+42.01)LRLIAAK	462.297	0.05	60	11.7	11.01		Acetylation (Protein N-term)	0	1860	640	0	2200	0	0	0	0	0	0	0	0	1610	1250	1610	6550	0	0	0	0	0	0	0	0	0	0	0
SSPAPAPKFSPVTPKFTPVAS	705.042	0.01	60	2.7	10	sp|Q15942|ZYX_HUMAN		0	0	8470	0	6090	0	0	1210	0	0	0	0	0	0	0	0	0	0	0	0	0	0	0	0	0	0	0	0
QKTIEPLLK	535.342	0.07	60	5.7	8.59			0	0	0	1150	0	3270	0	0	632	7600	0	0	1600	0	1520	0	0	0	0	0	0	0	0	0	0	0	0	0
Q(-17.03)ERYEIEETETVT	805.36	0.03	60	5	3.98		Pyro-glu from Q	0	0	0	0	0	0	0	3700	2400	2780	2330	4670	0	0	0	0	0	0	0	0	0	0	0	0	0	0	0	0
SLEDKTERELLESY	571.283	0.02	60	3.8	4.25			0	2600	0	0	0	0	0	9210	0	0	4070	0	0	0	0	0	0	0	0	0	0	0	0	0	0	0	0	0
TTAESTLAPTT	546.777	0.02	60	13.3	4			0	0	0	0	0	15900	0	0	0	0	0	0	0	0	0	0	0	0	0	0	0	0	0	0	0	0	0	0
HESDNKDISESSTQSDFSAN(+.98)HSSPSKGSGMSADAN	723.295	0.04	60	4.1	4.51		Deamidation (NQ)	0	0	4480	0	0	0	0	0	0	0	0	0	0	6280	0	5160	0	0	0	0	0	0	0	0	0	0	0	0
SQDDCGDGSDEEN	685.72	0.04	60	4.3	3.25			7210	0	0	1890	0	0	0	0	0	0	0	0	0	0	6840	0	0	0	0	0	0	0	0	0	0	0	0	0
YQ(+.98)MHGT	737.282	0.02	60	7.9	6.74		Deamidation (NQ)	0	0	0	12600	0	0	3360	0	0	0	0	0	0	0	0	0	0	0	0	0	0	0	0	0	0	0	0	0
KSN(+.98)SEEEEEEKEEEEEEEEEEEEEEEDENDDSKSPGKG	901.548	0.01	60	7.5	3.72		Deamidation (NQ)	8440	0	0	0	0	0	5980	0	0	0	0	0	0	0	1600	0	0	0	0	0	0	0	0	0	0	0	0	0
AIFNGLTLLILG	622.882	0.02	60	10.9	5.57			0	0	0	0	0	0	0	0	0	0	0	0	0	4440	0	11600	0	0	0	0	0	0	0	0	0	0	0	0
RRVSI	630.397	0.02	60	10.1	12			0	4330	0	5540	4270	0	0	0	0	0	0	0	0	0	1910	0	0	0	0	0	0	0	0	0	0	0	0	0
GPSLTNVTNSHSP	655.809	0.01	60	18.8	6.74			0	0	0	8960	0	0	0	0	0	0	0	0	0	0	0	7090	0	0	0	0	0	0	0	0	0	0	0	0
E(-18.01)GSGEGDSASSQ	1092.42	0.02	60	11.1	3.57		Pyro-glu from E	0	0	0	0	0	0	0	0	0	0	0	0	0	0	0	16100	0	0	0	0	0	0	0	0	0	0	0	0
SSSYSKQ(+.98)FTSSTSYN(+.98)RGDSTFESKSYKMADEAGSEADHEGTHST	958.203	0.01	60	11.3	5.01	sp|P02671|FIBA_HUMAN	Deamidation (NQ)	0	0	0	0	0	0	0	2000	0	0	0	0	0	0	0	0	14100	0	0	0	0	0	0	0	0	0	0	0
GNTSPFGQPFSQAGGQ(+.98)PMGATGVNPQ	845.038	0.01	60	11.6	5.52		Deamidation (NQ)	0	0	0	1500	0	0	0	0	0	0	3920	10700	0	0	0	0	0	0	0	0	0	0	0	0	0	0	0	0
Q(-17.03)FTSSTSYNRGDST	767.331	0.01	60	8.5	5.84	sp|P02671|FIBA_HUMAN	Pyro-glu from Q	5170	975	0	3280	0	0	0	0	0	0	0	0	0	0	2540	4160	0	0	0	0	0	0	0	0	0	0	0	0
QDRQ(+.98)CVLSTLAQLLLDKDCTVLVGRQ	729.881	0.01	60	12.9	6.03		Deamidation (NQ)	0	0	0	0	0	0	0	0	0	0	0	0	1870	0	0	0	14300	0	0	0	0	0	0	0	0	0	0	0
RIHWESASLLR	456.59	0.13	60	4	9.61	sp|P01024|CO3_HUMAN		0	0	991	0	5300	2290	1550	0	0	0	1560	0	1560	0	0	2920	0	0	0	0	0	0	0	0	0	0	0	0
SEN(+.98)GQLITGVQQTTERHNQAFM(+15.99)ALEGQ	1002.1	0.06	60	8.5	4.75		Deamidation (NQ); Oxidation (M)	0	3570	0	0	0	0	1190	0	0	1400	0	5690	2820	0	1630	0	0	0	0	0	0	0	0	0	0	0	0	0
TKEQVTNVGGAVVTGVT	830.447	0.08	60	7.4	5.66			0	0	518	0	0	0	0	0	0	1390	810	0	1520	2590	1780	2470	5280	0	0	0	0	0	0	0	0	0	0	0
SYSSSSSSSTAPPASTDTSSPKDCN(+.98)SESEV	995.079	0.02	60	8.5	3.92		Deamidation (NQ)	726	0	0	2490	0	0	622	0	0	0	12600	0	0	0	0	0	0	0	0	0	0	0	0	0	0	0	0	0
AAKKLQPI	434.787	0.02	60	13.6	10			0	0	0	1240	6120	0	279	8800	0	0	0	0	0	0	0	0	0	0	0	0	0	0	0	0	0	0	0	0
SSSYSKQFTSSTSYNRGDSTFESKSYKMADEAGSEADHEGTH	920.192	0.04	60	4.5	5.01	sp|P02671|FIBA_HUMAN		0	0	0	4900	6210	0	5410	0	0	0	0	0	0	0	0	0	0	0	0	0	0	0	0	0	0	0	0	0
PPSSPGPPEIPPEATTFQ(+.98)SSEAPS	803.362	0.01	60	2.9	3.67		Deamidation (NQ)	0	0	0	0	0	10900	0	0	0	0	0	0	0	0	0	5680	0	0	0	0	0	0	0	0	0	0	0	0
CLGSLLSHVIVALLPLIHIQPK	1182.72	0.03	60	8.5	8.24			3000	1670	0	6080	0	1660	2240	0	0	0	0	951	0	0	998	0	0	0	0	0	0	0	0	0	0	0	0	0
CGAGCNSGGN(+.98)IEDSDTGGGTSC	491.427	0.09	60	5	3.49		Deamidation (NQ)	6150	545	0	3170	0	1370	0	0	735	0	0	0	2010	0	2670	0	0	0	0	0	0	0	0	0	0	0	0	0
HVQPQPQPKPQVQLHVQSQ	551.547	0.08	60	1.8	8.76	sp|Q15942|ZYX_HUMAN		0	869	0	0	0	0	0	0	0	3510	1910	7570	0	2830	0	0	0	0	0	0	0	0	0	0	0	0	0	0
G(+42.01)EDAAQAEKFQHPGSDM(+15.99)	625.933	0.01	60	6.4	4.31		Acetylation (Protein N-term); Oxidation (M)	0	0	1850	3030	2600	3680	0	0	0	0	0	0	0	0	0	4540	1040	0	0	0	0	0	0	0	0	0	0	0
ICIPGKLQCNGYN(+.98)DCDDWSDEAHCNCSEN(+.98)LFHCHT	798.104	0.01	60	9.9	4.5		Deamidation (NQ)	0	0	2410	0	5790	0	0	0	7490	0	0	0	1100	0	0	0	0	0	0	0	0	0	0	0	0	0	0	0
Q(+.98)GYPCEGT	855.34	0.12	60	3.9	4		Deamidation (NQ)	0	0	0	0	0	0	4850	0	0	3070	1780	0	0	0	0	0	7100	0	0	0	0	0	0	0	0	0	0	0
APEVGPPSYAPQVTP	755.387	0.01	60	17.2	4			0	0	10300	0	0	0	0	6560	0	0	0	0	0	0	0	0	0	0	0	0	0	0	0	0	0	0	0	0
HEN(+.98)APEPDSMTCC	717.753	0.13	60	7.6	4.13		Deamidation (NQ)	7910	2960	0	891	0	0	0	0	0	2460	0	1480	0	0	1200	0	0	0	0	0	0	0	0	0	0	0	0	0
AEEVHSDPCENNPCLHGGTCNANGT	643	0.08	60	7.7	4.39			0	1120	0	0	0	0	0	3130	4320	2960	2960	0	2420	0	0	0	0	0	0	0	0	0	0	0	0	0	0	0
SGPN(+.98)GAAG	631.27	0.09	60	5.3	5.24		Deamidation (NQ)	0	0	0	0	0	0	0	6320	5960	0	0	0	0	0	0	4650	0	0	0	0	0	0	0	0	0	0	0	0
RQLGLPGPPDVPDHAAYHPF	728.71	0.01	60	6.3	5.98			0	0	0	0	0	0	0	9420	0	0	7520	0	0	0	0	0	0	0	0	0	0	0	0	0	0	0	0	0
TLHSTSPAEEFYTRHVLQ	706.018	0.02	60	7.8	5.94			0	0	3940	0	0	0	0	1010	0	0	0	4820	1480	0	673	5030	0	0	0	0	0	0	0	0	0	0	0	0
SEGDGYSSENTSR	694.788	0.05	60	4.6	4.14			5850	0	0	5040	0	0	3730	0	0	0	0	0	0	0	2480	0	0	0	0	0	0	0	0	0	0	0	0	0
LALILPLLF	506.841	0.03	60	10.2	5.52			0	8910	0	3910	0	0	0	0	516	0	0	0	0	3780	0	0	0	0	0	0	0	0	0	0	0	0	0	0
KKAKAAKPKKAP	633.421	0.03	60	3.4	10.7			2660	6340	0	0	0	0	0	0	6250	0	0	0	0	0	1950	0	0	0	0	0	0	0	0	0	0	0	0	0
VTAQKQ(+.98)VLLSL	600.863	0.01	60	10.1	8.72		Deamidation (NQ)	0	0	0	0	0	0	0	0	0	0	0	0	0	0	0	427	16900	0	0	0	0	0	0	0	0	0	0	0
SGANTATNSESSTTSSGANTATNSDSSTTSSGASTAT	843.606	0.02	60	7.9	3.67			2380	495	0	0	0	0	0	0	0	507	0	0	0	1650	6590	0	5810	0	0	0	0	0	0	0	0	0	0	0
PVYDSNVFAESSRPGPPGLPGNQGP	847.078	0.02	60	5.8	4.37			0	880	0	0	0	0	1930	0	0	2510	2020	5070	2590	0	2480	0	0	0	0	0	0	0	0	0	0	0	0	0
AFKVPAPK	429.27	0.09	60	5.7	10			2140	0	2310	0	2940	3880	0	0	0	652	1510	1960	0	0	2110	0	0	0	0	0	0	0	0	0	0	0	0	0
RQLFHPEQLITGKEDAANNY	782.051	0.01	60	7.1	5.45	sp|P68366|TBA4A_HUMAN		0	1550	0	0	0	0	0	1320	0	2470	0	8350	0	0	3840	0	0	0	0	0	0	0	0	0	0	0	0	0
GM(+15.99)QGPEGPQGPPGQKGDTG	905.881	0.05	60	6.7	4.37		Oxidation (M)	0	0	0	2920	0	0	0	0	0	0	0	0	811	6400	0	7440	0	0	0	0	0	0	0	0	0	0	0	0
SSSYSKQFTSSTSYN(+.98)RGDSTFESKSYKMADEAGSEADHEGTHST	1197.26	0.06	60	4.9	5.01	sp|P02671|FIBA_HUMAN	Deamidation (NQ)	0	0	0	1490	0	0	4420	0	0	3140	0	0	0	0	0	0	8550	0	0	0	0	0	0	0	0	0	0	0
TILTKLKAK	508.351	0.02	60	8.3	10.3			2470	0	0	0	0	0	4410	0	2380	0	562	0	1840	0	2060	3910	0	0	0	0	0	0	0	0	0	0	0	0
PPNLPILLP	487.309	0.02	60	0	5.96			0	0	0	0	0	17700	0	0	0	0	0	0	0	0	0	0	0	0	0	0	0	0	0	0	0	0	0	0
Q(-17.03)DGAELRPGFVLALHCDVDGQPAPQ(+.98)LHWHIQIPSGIVEITSP	905.863	0.01	60	0	4.77		Pyro-glu from Q; Deamidation (NQ)	0	0	0	0	0	0	0	17700	0	0	0	0	0	0	0	0	0	0	0	0	0	0	0	0	0	0	0	0
KVIEK	616.39	0.05	60	10.1	8.59	sp|P02671|FIBA_HUMAN		0	0	0	433	0	3760	0	2440	0	0	0	11100	0	0	0	0	0	0	0	0	0	0	0	0	0	0	0	0
DKPDMAEIEKFDKSKLKKTET	497.063	0.04	60	4.2	6.3	sp|P62328|TYB4_HUMAN		0	0	9180	0	0	8560	0	0	0	0	0	0	0	0	0	0	0	0	0	0	0	0	0	0	0	0	0	0
Q(-17.03)FTSSTSYNRGDSTFESKSYKM(+15.99)	850.706	0.04	60	11.3	8.43	sp|P02671|FIBA_HUMAN	Pyro-glu from Q; Oxidation (M)	1800	0	0	1250	0	0	0	0	2620	683	0	1870	2640	6930	0	0	0	0	0	0	0	0	0	0	0	0	0	0
N(+.98)DNDGSSGASDQ(+.98)D	428.475	0.1	60	3.4	3.32		Deamidation (NQ)	12800	0	0	0	0	0	0	0	0	2160	0	0	0	0	2850	0	0	0	0	0	0	0	0	0	0	0	0	0
AIQLTYN(+.98)PDESSKPNM(+15.99)IDAATLK	846.425	0.01	60	4.8	4.56		Deamidation (NQ); Oxidation (M)	0	0	3650	2900	0	0	0	0	5040	3450	2780	0	0	0	0	0	0	0	0	0	0	0	0	0	0	0	0	0
ASQ(+.98)N(+.98)GAPALVKQ(+.98)EEGSGGPA	468.469	0.07	60	2.1	4.53		Deamidation (NQ)	0	0	6340	0	0	6450	0	2090	1680	1320	0	0	0	0	0	0	0	0	0	0	0	0	0	0	0	0	0	0
VIKAGFLVTARG	1231.74	0.08	60	7.5	11			208	1150	2800	166	0	447	0	1160	1200	0	693	3520	432	817	524	3440	1330	0	0	0	0	0	0	0	0	0	0	0
RFGGSGGMN(+.98)HVSGMQATT	898.384	0.02	60	5.9	9.76		Deamidation (NQ)	2600	332	3120	0	0	0	0	0	0	0	0	0	7640	0	0	0	4210	0	0	0	0	0	0	0	0	0	0	0
PPKTPN(+.98)GNHTGGNIARFSP	654.999	0.01	60	6.6	11.01		Deamidation (NQ)	0	0	7680	0	0	0	0	5340	2780	0	0	2190	0	0	0	0	0	0	0	0	0	0	0	0	0	0	0	0
GAILVAAIVLGG	527.337	0.03	60	9	5.52			0	442	0	12200	260	0	0	323	0	4260	0	272	0	0	271	0	0	0	0	0	0	0	0	0	0	0	0	0
S(+42.01)HSASEEASGSDSGSQSESEQGSDPGSGHGSE	773.789	0.01	60	7.8	4		Acetylation (Protein N-term)	0	0	0	0	0	0	0	0	0	0	638	0	2360	0	0	15100	0	0	0	0	0	0	0	0	0	0	0	0
AAQ(+.98)GHS	571.251	0.07	60	3.4	6.79		Deamidation (NQ)	0	0	0	0	0	0	0	4780	5060	0	0	0	0	0	0	8290	0	0	0	0	0	0	0	0	0	0	0	0
SKQFTSSTSYNRGDSTFESKSYKMA	568.265	0.03	60	9.7	9.4	sp|P02671|FIBA_HUMAN		0	0	980	0	12200	0	0	0	0	0	0	2650	843	0	233	1230	0	0	0	0	0	0	0	0	0	0	0	0
TSSGIYTGNN(+.98)SLTNSSGFNSSQ(+.98)QDYPS	704.552	0.04	60	8.9	3.8		Deamidation (NQ)	0	0	0	0	5450	0	0	0	0	1270	1430	0	2470	0	0	4070	3490	0	0	0	0	0	0	0	0	0	0	0
GFLILGGLLLN	565.361	0.1	60	4.4	5.52			964	1420	0	5020	0	2740	297	0	211	568	0	3360	0	254	1910	1440	0	0	0	0	0	0	0	0	0	0	0	0
SSSYSKQFTSSTSYNRGDSTFESKSYKM(+15.99)ADEAGSEADHEGTHSTKRGHA	1070.87	0.07	60	5.2	6.23	sp|P02671|FIBA_HUMAN	Oxidation (M)	9560	0	0	0	0	0	0	0	2900	0	0	0	0	5760	0	0	0	0	0	0	0	0	0	0	0	0	0	0
GASQAYPGYPVGSGVEGTETYQ(+.98)SPPFTET	745.33	0.01	60	9.3	3.67		Deamidation (NQ)	0	6710	0	0	0	0	5740	0	0	5810	0	0	0	0	0	0	0	0	0	0	0	0	0	0	0	0	0	0
LKARKSATV	487.31	0.05	60	8.1	11.17			1980	2910	2770	0	2900	2160	0	0	0	1860	2200	0	0	0	1510	0	0	0	0	0	0	0	0	0	0	0	0	0
RRRLLQR	499.334	0.02	60	9.9	12.48			0	12600	0	0	0	0	617	0	1730	0	0	0	3500	0	0	0	0	0	0	0	0	0	0	0	0	0	0	0
SVSDSQ(+.98)PCEPPSVGTEYSQ(+.98)GASPQPQHQ	733.077	0.01	60	9.6	4.13		Deamidation (NQ)	0	0	5730	0	2180	0	0	6600	557	0	0	1610	0	0	245	0	1630	0	0	0	0	0	0	0	0	0	0	0
GKSSSYSKQFTSSTSYNRGDSTFESKSYKMADEAGSEADHEGTHST	994.839	0.03	60	3	5.46	sp|P02671|FIBA_HUMAN		3420	0	4340	0	0	3830	0	1860	1080	0	0	0	0	0	0	4040	0	0	0	0	0	0	0	0	0	0	0	0
S(+42.01)ETSRTAFGGRRAVPPNNSNAAEDDLPTVELQ(+.98)GVVPR	988.498	0.01	60	8.3	4.93		Acetylation (Protein N-term); Deamidation (NQ)	0	0	0	0	0	5120	0	0	0	0	6460	0	0	0	0	0	6990	0	0	0	0	0	0	0	0	0	0	0
Q(-17.03)ERKRAQSEAEKLAKERQEAEEAKEALLQ	676.756	0.08	60	3.8	5.3		Pyro-glu from Q	0	0	2270	0	0	0	0	4120	6360	761	1590	3570	0	0	0	0	0	0	0	0	0	0	0	0	0	0	0	0
PVEPVTSVTQPSELLQQKGVQYG	497.664	0.07	60	3.7	4.53			895	0	869	0	4420	8320	0	0	0	0	0	0	0	0	0	4280	0	0	0	0	0	0	0	0	0	0	0	0
KEEEEM(+15.99)VAENRR	768.356	0.02	60	8.4	4.65		Oxidation (M)	4620	5180	0	0	0	0	0	0	4890	0	0	0	4150	0	0	0	0	0	0	0	0	0	0	0	0	0	0	0
TSYLETFREQ(+.98)VVN(+.98)ET	606.624	0.06	60	4	4.25		Deamidation (NQ)	8500	720	0	813	484	2350	0	0	1320	0	406	0	0	1210	1010	2040	0	0	0	0	0	0	0	0	0	0	0	0
EDECALMLLEHGTDPNIPDEYG	616.001	0.04	60	2.4	3.66			0	0	0	0	0	6970	0	0	0	0	0	0	0	0	0	0	11900	0	0	0	0	0	0	0	0	0	0	0
QKVPAAK	371.232	0.04	60	8.4	10			0	1400	0	0	4820	7750	0	0	0	1900	0	0	0	0	0	3040	0	0	0	0	0	0	0	0	0	0	0	0
ACVGADLQAEMCN(+.98)TQACEKTQLEFM(+15.99)SQQCARTDGQ	957.144	0.01	60	2.6	4.18		Deamidation (NQ); Oxidation (M)	0	0	0	0	0	0	0	0	0	0	0	0	4030	0	0	14900	0	0	0	0	0	0	0	0	0	0	0	0
SEPGEAKKMEDKEKDN(+.98)KLISANSSEGQD	767.11	0.02	60	8.2	4.55		Deamidation (NQ)	0	0	0	0	7240	0	0	0	0	0	0	0	0	0	0	0	11900	0	0	0	0	0	0	0	0	0	0	0
PTCPN	531.221	0.06	60	2.8	5.91			0	0	0	0	0	0	0	7500	2290	0	0	0	1460	0	0	8040	0	0	0	0	0	0	0	0	0	0	0	0
HSEENEEEEEECAN(+.98)ATDVTTTPSVQ(+.98)YINGKHLVT	761.939	0.02	60	4.7	4.14		Deamidation (NQ)	0	1750	1960	980	3810	4120	0	2850	0	0	0	0	0	3820	0	0	0	0	0	0	0	0	0	0	0	0	0	0
VATDKGQPSLSSSTEVVV	902.47	0.04	60	7.8	4.37			0	2140	0	0	0	0	17200	0	0	0	0	0	0	0	0	0	0	0	0	0	0	0	0	0	0	0	0	0
VNPFRPGDSEPPPAPGA	852.918	0.01	60	8.6	4.37	sp|Q15942|ZYX_HUMAN		0	0	6100	0	7030	0	0	0	0	0	0	0	0	0	0	0	6250	0	0	0	0	0	0	0	0	0	0	0
GQQAM(+15.99)SLAILRVIRLVRVFRIFKLSRHSKG	1166.01	0.08	60	4.1	12.6		Oxidation (M)	0	0	0	0	0	4710	0	0	0	0	0	0	0	0	0	9510	5210	0	0	0	0	0	0	0	0	0	0	0
KSDVLSQLPAKQRKIVVIAPGRINA	901.214	0.03	60	10.7	11.1			0	0	0	0	8040	0	0	0	2590	0	0	0	776	7770	0	257	0	0	0	0	0	0	0	0	0	0	0	0
FKAKLK	734.486	0.07	60	6.5	10.3			0	0	1590	0	0	6050	2150	0	1940	2460	0	0	0	4730	514	0	0	0	0	0	0	0	0	0	0	0	0	0
DVIGDEICCWS	1239.49	0.04	60	12.1	3.49			3840	0	0	0	0	0	0	1710	12500	57.1	0	0	0	0	1340	0	0	0	0	0	0	0	0	0	0	0	0	0
KLIRLF	395.278	0.22	60	4.6	11			574	4270	455	0	0	657	808	4560	1920	803	2870	426	419	0	790	0	1040	0	0	0	0	0	0	0	0	0	0	0
N(+.98)LIKEAVRRLHSRRLQLRAKLPQR	984.931	0.01	60	7.1	12.3		Deamidation (NQ)	0	0	0	0	0	1160	5970	1070	1590	1110	0	0	1530	5660	1510	0	0	0	0	0	0	0	0	0	0	0	0	0
KKKTKAPPLSKKEKKPLTKKEK	641.662	0.02	60	6.9	10.43			10200	0	0	0	0	0	899	0	0	0	871	2050	0	2580	0	0	3040	0	0	0	0	0	0	0	0	0	0	0
LLTLAILIFAS	587.88	0.01	60	12.6	5.52			0	0	2830	0	4400	0	0	0	4570	0	0	0	3330	0	0	4550	0	0	0	0	0	0	0	0	0	0	0	0
CDGQ(+.98)NDCGDNSDEENC	573.503	0.03	60	7.6	3.25		Deamidation (NQ)	7030	164	0	8210	0	0	795	882	561	196	461	202	614	0	567	0	0	0	0	0	0	0	0	0	0	0	0	0
DN(+.98)EADFLAEIEAL	725.822	0.01	60	0	3.39		Deamidation (NQ)	0	0	0	19700	0	0	0	0	0	0	0	0	0	0	0	0	0	0	0	0	0	0	0	0	0	0	0	0
Q(+.98)Q(+.98)YSGMTHEDIVQESKKYWQ(+.98)QMEAHAGK	668.902	0.03	60	8.7	6.03		Deamidation (NQ)	2660	0	6920	0	0	0	378	4230	0	0	591	0	0	2770	1040	1120	0	0	0	0	0	0	0	0	0	0	0	0
ESNLSRGDQILEVNSVN(+.98)VRH	756.381	0.01	60	7.1	5.45		Deamidation (NQ)	0	0	11500	0	4210	0	0	0	2240	0	0	0	0	1790	0	0	0	0	0	0	0	0	0	0	0	0	0	0
KGGSATKILLETLLLAAHKTVDQGIAA	907.201	0.02	60	10.3	8.51			0	0	0	0	5390	0	0	0	0	0	0	1480	1220	0	0	373	11300	0	0	0	0	0	0	0	0	0	0	0
PGGFPLAWGSPQ	607.292	0.24	60	3.8	5.96			10900	482	0	980	0	0	0	0	0	826	1150	2070	0	0	3370	0	0	0	0	0	0	0	0	0	0	0	0	0
QHCQ(+.98)MCECDS	592.68	0.03	60	11.3	4.35		Deamidation (NQ)	2710	0	0	16200	0	0	0	0	0	886	0	0	0	0	0	0	0	0	0	0	0	0	0	0	0	0	0	0
SYNRGDSTFESKSYKMADEAGSEADHEGTHSTKRGHAKSRPV	923.028	0.02	60	2.9	6.79	sp|P02671|FIBA_HUMAN		4610	4900	0	0	0	0	0	0	0	0	0	0	0	10400	0	0	0	0	0	0	0	0	0	0	0	0	0	0
NPCSHSC	747.246	0.11	60	3.6	6.72			0	0	1880	0	0	2200	0	6960	5330	0	0	0	0	0	0	3650	0	0	0	0	0	0	0	0	0	0	0	0
RPIPR	638.412	0.04	60	6.7	12			762	0	0	6190	0	0	0	0	0	0	0	0	3230	0	0	9870	0	0	0	0	0	0	0	0	0	0	0	0
KLFRNILKEKGIVVGIKLDQ(+.98)GGAPL	903.213	0.06	60	11.2	10		Deamidation (NQ)	0	4010	2750	0	3870	0	0	0	1640	0	0	0	1470	0	1180	0	5160	0	0	0	0	0	0	0	0	0	0	0
KDVQ(+.98)LSQAGDLIMEVYIEQ(+.98)	727.704	0.05	60	7	3.92		Deamidation (NQ)	0	885	0	0	0	0	699	0	11500	4440	0	0	2570	0	0	0	0	0	0	0	0	0	0	0	0	0	0	0
EGMEEGEFSEAREDMAA	944.367	0.09	60	3.5	3.77	sp|P68366|TBA4A_HUMAN		0	0	3100	0	0	4020	0	0	1580	704	966	1170	0	1910	0	0	6680	0	0	0	0	0	0	0	0	0	0	0
E(-18.01)GGGEA	501.193	0.01	60	4	3.8		Pyro-glu from E	0	0	0	0	0	0	0	0	0	0	776	19400	0	0	0	0	0	0	0	0	0	0	0	0	0	0	0	0
LQGAKIPKPEASFSPR	432.247	0.03	60	1.6	9.99			0	0	0	0	0	6880	0	0	0	0	0	0	0	0	0	13300	0	0	0	0	0	0	0	0	0	0	0	0
QGFQLANGTVCEDVN(+.98)ECMGEEHCAPHGECLN(+.98)SHGSFF	800.537	0.04	60	5.7	4.4		Deamidation (NQ)	0	0	0	0	0	0	1890	0	0	1510	0	5860	0	0	3060	0	7870	0	0	0	0	0	0	0	0	0	0	0
CADHFADGRCDQ(+.98)GCN	806.776	0.11	60	6.1	4.41		Deamidation (NQ)	0	1560	0	3880	0	0	3840	4370	4810	0	0	0	0	1840	0	0	0	0	0	0	0	0	0	0	0	0	0	0
GTLVSGGGKDRKLISWSGNY	524.529	0.01	60	0	9.7			0	0	0	0	0	0	0	0	0	0	0	0	0	0	0	20300	0	0	0	0	0	0	0	0	0	0	0	0
QGARGGCITLISSEGYVSSKYAGRAN(+.98)LTN(+.98)FPENGT	724.947	0.03	60	5.1	8.18		Deamidation (NQ)	0	0	0	0	0	4740	0	3380	0	0	0	6210	0	0	0	0	5980	0	0	0	0	0	0	0	0	0	0	0
CSCLDRVIQ	518.756	0.02	60	9.3	5.82			0	0	0	0	0	11100	0	0	0	0	0	0	0	0	0	5250	3990	0	0	0	0	0	0	0	0	0	0	0
PAKKLALSAK	513.836	0.09	60	9.1	10.31			2780	0	3110	0	3220	0	0	0	0	1400	2930	1660	0	2060	1850	0	1360	0	0	0	0	0	0	0	0	0	0	0
LILPQSIQLPPGQSLSVGAPRRIPPPGSQ(+.98)	1002.27	0.04	60	11.6	12		Deamidation (NQ)	3440	233	5410	0	0	0	1160	0	0	0	0	4900	0	5290	0	0	0	0	0	0	0	0	0	0	0	0	0	0
TVPVALPIQQ	533.321	0.03	60	8.3	5.19			0	0	4910	397	1180	4540	0	4890	699	1420	0	0	559	1980	0	0	0	0	0	0	0	0	0	0	0	0	0	0
TNDTN(+.98)GYSSGGGGHSPSAD	594.564	0.16	60	4.1	4.2		Deamidation (NQ)	5810	0	0	2540	2590	0	0	2190	0	1860	1360	0	0	4250	0	0	0	0	0	0	0	0	0	0	0	0	0	0
NESSNSSDSSDSSN(+.98)SSDSDSSDSSNSS	887.313	0.11	60	9	3.21		Deamidation (NQ)	461	0	0	2480	0	0	1290	0	0	1650	947	2170	0	2890	0	8720	0	0	0	0	0	0	0	0	0	0	0	0
KSSFPGSLTAFCYEN(+.98)ELALSCCQEEDED	1039.41	0.07	60	10.1	3.71		Deamidation (NQ)	3330	0	0	3370	0	0	3100	0	0	2740	0	0	0	0	8090	0	0	0	0	0	0	0	0	0	0	0	0	0
Q(-17.03)AGDVEGPSTGDPVLSPQHN(+.98)C	697.955	0.07	60	8.2	4.02		Pyro-glu from Q; Deamidation (NQ)	0	0	3170	0	0	0	0	2300	3730	0	0	0	0	3480	0	0	8060	0	0	0	0	0	0	0	0	0	0	0
DGRPPEESAHEMMEEEEEIPKPK	674.309	0.01	60	9.9	4.33			0	0	1460	1680	0	2010	0	1870	2440	5660	0	0	3030	2620	0	0	0	0	0	0	0	0	0	0	0	0	0	0
HQHSNSM(+15.99)DNLDSECSEVYQ(+.98)PLTSSDDA	757.305	0.09	60	6.9	3.95		Oxidation (M); Deamidation (NQ)	0	1630	0	1980	0	0	3080	0	2040	0	1070	4650	3440	0	2960	0	0	0	0	0	0	0	0	0	0	0	0	0
AYGGSATIVN(+.98)KPKYGSDDECSSGTSGSADSNGNQSFGA	922.643	0.02	60	5.8	4.23		Deamidation (NQ)	0	0	3720	1940	6040	0	0	0	0	0	0	0	0	0	1380	0	7790	0	0	0	0	0	0	0	0	0	0	0
QQRKQM(+15.99)IAVKIKETKVM(+15.99)KLRKLAQQVAN	669.003	0.04	60	3.2	11.26		Oxidation (M)	6320	0	0	0	0	0	1710	4050	0	0	0	0	0	2010	0	0	6830	0	0	0	0	0	0	0	0	0	0	0
KDDCGNGADEEN(+.98)CGDT	411.637	0.1	60	5.8	3.66		Deamidation (NQ)	0	1190	0	4570	0	0	0	0	0	2670	0	0	1010	0	6490	5060	0	0	0	0	0	0	0	0	0	0	0	0
KQFTSSTSYNRGDSTFESKSY	605.779	0.05	60	4.3	8.43	sp|P02671|FIBA_HUMAN		6270	0	2150	0	3600	2510	0	0	0	1310	0	3090	719	0	1350	0	0	0	0	0	0	0	0	0	0	0	0	0
TILPKKK	414.286	0.14	60	7.5	10.3			0	0	4810	0	2790	3440	0	0	0	0	0	2220	0	1820	0	3300	2630	0	0	0	0	0	0	0	0	0	0	0
VGAGVVLMLIILVALLMLVFRSKREVKRQ(+.98)KYRLSQ(+.98)L	1036.39	0.01	60	8.7	11.58		Deamidation (NQ)	0	0	0	2700	2740	5520	2000	0	0	0	0	0	5380	0	0	2700	0	0	0	0	0	0	0	0	0	0	0	0
PLLLAPLP	417.288	0.17	60	8	5.96			521	5170	642	483	0	636	948	5480	2190	990	909	510	385	0	957	0	1280	0	0	0	0	0	0	0	0	0	0	0
KQKKVENAAK	572.354	0.06	60	13	10			4850	1150	0	0	0	5880	0	355	0	4290	4640	0	0	0	0	0	0	0	0	0	0	0	0	0	0	0	0	0
VPVPPGWN	865.452	0.03	60	3	5.49	sp|Q14686|NCOA6_HUMAN		0	0	9030	0	0	9750	0	0	0	0	0	0	0	2450	0	0	0	0	0	0	0	0	0	0	0	0	0	0
KPVFIKVP	464.312	0.08	60	7.4	10			0	0	0	0	3970	0	3380	0	3450	1030	0	2340	2410	1740	0	0	3040	0	0	0	0	0	0	0	0	0	0	0
LN(+.98)LLYKLLAAL	623.398	0.03	60	11	8.59		Deamidation (NQ)	392	0	0	0	0	0	0	14900	0	0	3590	0	742	0	0	0	1770	0	0	0	0	0	0	0	0	0	0	0
SLDRNLPSDSQDLGQHGLEEDFM	868.393	0.09	60	5.4	3.96			4850	9450	0	0	0	0	0	6100	0	0	0	0	0	1020	0	0	0	0	0	0	0	0	0	0	0	0	0	0
KEN(+.98)KKKQLILKLPVIFAKIQL	624.157	0.02	60	12.3	10.3		Deamidation (NQ)	4970	0	0	0	16000	0	0	0	0	0	598	0	0	0	0	0	0	0	0	0	0	0	0	0	0	0	0	0
GGDGDGD	592.183	0.03	60	6.8	3.42			0	0	0	21600	0	0	0	0	0	0	0	0	0	0	0	0	0	0	0	0	0	0	0	0	0	0	0	0
Q(-17.03)EAGGFFEDA	1053.41	0.05	60	12.8	3.57		Pyro-glu from Q	1490	0	0	527	539	0	1270	0	3100	1040	934	974	1410	2700	3180	3280	1270	0	0	0	0	0	0	0	0	0	0	0
CAMECFEAGDQ(+.98)GTCF	538.169	0.02	60	2.4	3.57		Deamidation (NQ)	0	4460	1480	0	0	0	8150	0	0	0	2950	0	0	0	0	0	4780	0	0	0	0	0	0	0	0	0	0	0
QDSCQ(+.98)DSEGDM(+15.99)IFPAESSCALPQ(+.98)EGS	917.02	0.03	60	9	3.29		Deamidation (NQ); Oxidation (M)	0	2850	3300	0	0	0	0	1030	7200	0	0	0	2200	0	0	0	5290	0	0	0	0	0	0	0	0	0	0	0
KELM(+15.99)IVGRVFVLLLVLVSILWIPVVQ(+.98)ASQ	1093.99	0.16	60	8.1	8.75		Oxidation (M); Deamidation (NQ)	2870	5510	0	0	0	0	0	7280	0	0	0	2730	0	3540	0	0	0	0	0	0	0	0	0	0	0	0	0	0
EYDAQ(+.98)EGHCRPRGAGGQSM(+15.99)SEAPTGD	908.371	0.01	60	5.4	4.5		Deamidation (NQ); Oxidation (M)	0	143	0	0	0	0	0	0	14400	0	0	0	0	0	0	7430	0	0	0	0	0	0	0	0	0	0	0	0
FTKKKPVAG	488.301	0.07	60	5.5	10.3			4270	3230	0	1140	2110	0	0	0	0	0	3150	5680	0	0	2410	0	0	0	0	0	0	0	0	0	0	0	0	0
FLPLVAMVLLV	1214.74	0.04	60	9.2	5.52			5930	614	2300	1970	1210	2580	1670	985	536	1240	789	0	0	0	580	1610	0	0	0	0	0	0	0	0	0	0	0	0
TLLPPALRALR	610.895	0.09	60	5.2	12	sp|A6NKX4|S22AV_HUMAN		2550	3430	0	1450	2230	0	0	1010	0	1060	1460	2630	1790	0	1770	2640	0	0	0	0	0	0	0	0	0	0	0	0
GLFAASGTRN(+.98)ASQGAGSS	547.263	0.02	60	10.6	9.75		Deamidation (NQ)	0	0	0	0	0	21200	0	0	0	0	0	0	0	0	0	853	0	0	0	0	0	0	0	0	0	0	0	0
RSQ(+.98)KRKLQLGLQFLPGK	666.735	0.05	60	7.6	12.02		Deamidation (NQ)	991	0	0	2270	0	0	1930	1860	3860	0	0	4110	0	934	0	0	6120	0	0	0	0	0	0	0	0	0	0	0
PPGDDGFPGERGDK	722.326	0.13	60	11.6	4.23			9170	1640	0	2800	0	0	5900	0	0	0	0	0	0	0	2580	0	0	0	0	0	0	0	0	0	0	0	0	0
VEILKAVPP	483.313	0.04	60	5.9	5.97			14000	340	0	0	524	0	0	5160	466	402	0	402	447	0	359	0	0	0	0	0	0	0	0	0	0	0	0	0
SEGGFTATGQRQLRPEHFQEVGYAAPPSPPLS	853.673	0.08	60	7.5	5.47			6060	0	0	2360	0	0	0	5350	5120	0	0	3260	0	0	0	0	0	0	0	0	0	0	0	0	0	0	0	0
KVIKLVNK	471.331	0.08	60	5.6	10.3			0	0	0	2160	3660	3540	0	1300	614	2350	0	3570	0	1200	0	3760	0	0	0	0	0	0	0	0	0	0	0	0
GAGGGPGPTQGEEQPPQ(+.98)PPLDPQ(+.98)NLA	837.698	0.03	60	5.6	3.57		Deamidation (NQ)	0	0	0	0	0	6520	0	1560	0	0	0	0	0	0	0	7530	6560	0	0	0	0	0	0	0	0	0	0	0
HGSGSSYSYSRGHYESGSGQ(+.98)TSGFGQHESGSGQ	1117.46	0.07	60	9.4	6.27		Deamidation (NQ)	0	0	0	0	0	18200	0	3290	0	0	0	0	0	0	778	0	0	0	0	0	0	0	0	0	0	0	0	0
HTAGAK	584.321	0.06	60	9.3	8.76			0	0	0	0	0	0	0	0	4210	1220	6060	4430	3260	3090	0	0	0	0	0	0	0	0	0	0	0	0	0	0
HGDGSELDDEGMQSDDPESIRSERGNSRMNSAGMKSKESGENSEQ(+.98)AN	1012.02	0.01	60	7.5	4.3		Deamidation (NQ)	0	0	9650	0	0	0	0	6110	0	0	0	0	0	0	0	6560	0	0	0	0	0	0	0	0	0	0	0	0
KPSN(+.98)N(+.98)VSVIQVTTRTRKSVTEVKEMDVHT	657.949	0.03	60	3.8	9.7		Deamidation (NQ)	0	0	3910	0	7500	0	0	0	0	0	0	0	0	1190	0	0	9740	0	0	0	0	0	0	0	0	0	0	0
GQKDSYVGDEAQSKRGILTL	722.376	0.01	60	2.9	6.12			0	0	0	0	0	0	0	0	0	0	0	0	0	3140	0	1970	17300	0	0	0	0	0	0	0	0	0	0	0
CDCGYSDQC	497.141	0.19	60	3.5	3.56	sp|O14672|ADA10_HUMAN		3310	898	5500	1170	0	8590	0	0	0	0	1040	0	0	0	1990	0	0	0	0	0	0	0	0	0	0	0	0	0
CSCDPQ(+.98)GAVRDDCEQ(+.98)MTGLCS	1110.4	0.07	60	7.4	3.84		Deamidation (NQ)	0	0	6310	0	10900	5290	0	0	0	0	0	0	0	0	0	0	0	0	0	0	0	0	0	0	0	0	0	0
HPCGQ(+.98)GTCTN(+.98)VIGGFECACADGFEPGLM(+15.99)MTCEDIDECSLNPLLCAFRCHNT	1089.04	0.02	60	8	4.19		Deamidation (NQ); Oxidation (M)	3440	0	0	0	0	0	6900	0	477	0	0	0	0	0	0	11700	0	0	0	0	0	0	0	0	0	0	0	0
KTKEQVTNVGGAVVTGVT	596.666	0.16	60	4.5	8.59			2640	0	0	0	0	0	0	0	0	1610	882	3990	703	2340	4300	2580	3500	0	0	0	0	0	0	0	0	0	0	0
N(+.98)TQPRGPPASSPAPAPKFSPVTPKFTPVAS	758.898	0.01	60	4	11.17	sp|Q15942|ZYX_HUMAN	Deamidation (NQ)	0	0	11200	0	0	0	0	6910	4460	0	0	0	0	0	0	0	0	0	0	0	0	0	0	0	0	0	0	0
CDRWMHAVCQNLNTEEEVENVADI	564.456	0.04	60	4.1	4.08			0	0	3550	0	4840	4810	0	0	932	0	0	0	0	2900	0	0	5610	0	0	0	0	0	0	0	0	0	0	0
AVSGNETSTTTTQ(+.98)Q(+.98)VATPGTTM(+15.99)F	783.345	0.02	60	6.6	4		Deamidation (NQ); Oxidation (M)	0	0	0	2970	0	0	4320	1000	6650	2930	1920	0	2860	0	0	0	0	0	0	0	0	0	0	0	0	0	0	0
IVGIVLAVLLVAAIILAGIY	665.442	0.04	60	3.7	5.52			0	0	0	0	14100	0	5030	0	0	3670	0	0	0	0	0	0	0	0	0	0	0	0	0	0	0	0	0	0
SPQ(+.98)VTGN(+.98)WN(+.98)HAQDTKS	886.893	0.02	60	9.7	6.46		Deamidation (NQ)	0	0	2820	0	0	6120	0	1830	0	0	0	9010	0	0	0	0	3070	0	0	0	0	0	0	0	0	0	0	0
DLEPGTMDSIRSSKLG	569.284	0.03	60	7.1	4.56			0	0	1970	0	4820	0	0	0	0	0	0	0	0	2980	0	7380	5720	0	0	0	0	0	0	0	0	0	0	0
LLSVLLYAT	496.814	0.05	60	5.1	5.52			5650	1970	0	1190	0	3130	0	0	0	0	2760	5580	0	0	2660	0	0	0	0	0	0	0	0	0	0	0	0	0
HWYTSEGMDINEFGEAENNIHDLVSEYQQFQDA	784.134	0.01	60	8	3.89			0	0	0	16900	4550	0	0	0	0	1600	0	0	0	0	0	0	0	0	0	0	0	0	0	0	0	0	0	0
NEEGFF	742.302	0.03	60	7.1	3.79	sp|P02675|FIBB_HUMAN		20800	2280	0	0	0	0	0	0	0	0	0	0	0	0	0	0	0	0	0	0	0	0	0	0	0	0	0	0
RQLFHPEQLITGKEDAANN	546.031	0.06	60	4.8	5.45	sp|P68366|TBA4A_HUMAN		0	0	0	0	0	0	0	0	0	0	0	7990	1170	3810	497	0	9660	0	0	0	0	0	0	0	0	0	0	0
S(+42.01)ETSRTAFGGRRAVPPNNSNAAEDDLPTVELQ	1147.89	0.02	60	1.4	4.51		Acetylation (Protein N-term)	0	0	0	1530	0	0	0	0	21600	0	0	0	0	0	0	0	0	0	0	0	0	0	0	0	0	0	0	0
WIAIRAAAQ(+.98)VSEAVLAINLLI	1118.68	0.01	60	7.3	6		Deamidation (NQ)	0	622	0	0	0	0	2320	0	0	2360	4350	0	0	0	0	13600	0	0	0	0	0	0	0	0	0	0	0	0
Q(-17.03)FTSSTSYNRGD	673.286	0.03	60	8.9	5.84	sp|P02671|FIBA_HUMAN	Pyro-glu from Q	0	314	2990	0	8740	0	0	934	1180	0	0	1650	0	1640	0	2770	3140	0	0	0	0	0	0	0	0	0	0	0
TCNAN(+.98)GTMYGCSCDQ(+.98)G	542.844	0.07	60	5.7	3.8		Deamidation (NQ)	10100	1840	0	3980	0	0	0	0	0	0	0	2090	0	0	5390	0	0	0	0	0	0	0	0	0	0	0	0	0
GAGSIAAATGFVKKDQLGKNEE	548.539	0.02	60	9.3	6.18			0	0	0	0	0	0	0	0	0	0	0	2080	0	4950	0	3180	13200	0	0	0	0	0	0	0	0	0	0	0
KKKKEEQ(+.98)RKRVILQSNRLRAEVFKK	1047.64	0.04	60	8.4	11.13		Deamidation (NQ)	3580	0	0	377	0	0	2740	0	3290	350	1480	2070	0	0	4580	0	5040	0	0	0	0	0	0	0	0	0	0	0
LPPLQK	695.446	0.15	60	5.9	8.75			0	0	2020	0	1790	2310	0	1670	0	0	2670	1770	2110	2380	1730	1810	3280	0	0	0	0	0	0	0	0	0	0	0
KERELEEARKKLAQIRQQ	564.075	0.1	60	6.4	9.69			0	0	1350	0	3800	3890	0	0	0	1140	439	4350	0	0	1330	2070	5210	0	0	0	0	0	0	0	0	0	0	0
SSYSKQFTSSTSY	736.832	0.03	60	9.6	8.22	sp|P02671|FIBA_HUMAN		6560	1600	0	1520	3820	0	4620	0	0	0	975	0	0	318	0	4210	0	0	0	0	0	0	0	0	0	0	0	0
TSEYQTFFNPR	695.324	0.03	60	4.3	5.66			0	0	0	1680	0	0	0	0	0	0	0	5040	4130	5520	0	0	7280	0	0	0	0	0	0	0	0	0	0	0
SKITHRIHWESASLL	445.249	0.05	60	2.3	8.51	sp|P01024|CO3_HUMAN		0	7430	4230	0	0	0	0	4810	0	0	0	0	0	3410	0	0	3780	0	0	0	0	0	0	0	0	0	0	0
QDIN(+.98)ECGSAQAPCSYGCSNTEGGYLCGCPPGYFRIGQGH	808.911	0.04	60	9	4.65		Deamidation (NQ)	4920	0	0	0	10100	0	564	0	0	1440	1000	0	0	0	1010	0	4750	0	0	0	0	0	0	0	0	0	0	0
VSETESRGSESGIFTNTKESSSHHPGIAEFPSRG	721.741	0.05	60	4.3	5.45	sp|P02671|FIBA_HUMAN		0	0	5920	0	0	7230	0	2380	2640	0	0	0	0	2530	0	3140	0	0	0	0	0	0	0	0	0	0	0	0
KFSPGAPGGSGSQPNQKLGHPEALSAGTGSPQPPSFTY	935.451	0.04	60	5	8.51	sp|Q15942|ZYX_HUMAN		0	2400	0	0	0	0	0	5320	1750	4940	2240	7270	0	0	0	0	0	0	0	0	0	0	0	0	0	0	0	0
DSQNDCSDNSDEEN	393.629	0.05	60	4.8	3.25			3740	9760	0	1220	0	0	0	0	0	0	9250	0	0	0	0	0	0	0	0	0	0	0	0	0	0	0	0	0
TTQ(+.98)ELADACDM(+15.99)T	439.176	0.06	60	8.8	3.49		Deamidation (NQ); Oxidation (M)	0	0	0	0	0	0	750	0	0	1650	0	0	0	0	0	21600	0	0	0	0	0	0	0	0	0	0	0	0
SVVQ(+.98)CIVGDHAGGTFPVM(+15.99)MHHKTKGSAMSTVVFEYPLN	819.188	0.01	60	9.9	6.78	sp|Q86WI1|PKHL1_HUMAN	Deamidation (NQ); Oxidation (M)	2350	883	0	0	0	0	0	6250	6520	0	0	5930	0	0	0	2130	0	0	0	0	0	0	0	0	0	0	0	0
EVRGQ(+.98)VQMDVDLQSVDINQ(+.98)CASGPGWYSNTHLCDLNSTQ(+.98)CV	903.393	0.08	60	8.2	4.03		Deamidation (NQ)	0	1520	0	0	0	0	0	6480	3910	1980	3610	6610	0	0	0	0	0	0	0	0	0	0	0	0	0	0	0	0
LPNVLIVQ	448.286	0.01	60	6.3	5.52			0	0	17900	0	0	0	3790	0	0	2600	0	0	0	0	0	0	0	0	0	0	0	0	0	0	0	0	0	0
AIQLTYNPDESSKPNMIDAATL	1196.59	0.02	60	3.7	4.03			24300	0	0	0	0	0	0	0	0	0	0	0	0	0	0	0	0	0	0	0	0	0	0	0	0	0	0	0
EEHPVLLTEAPLNPK	562.972	0.06	60	8.8	4.75			0	0	7310	0	0	0	0	0	0	0	0	0	0	0	0	8860	8140	0	0	0	0	0	0	0	0	0	0	0
NRGDSTFESKSYKMADEAGSEADHEGTH	612.063	0.02	60	3.1	4.69	sp|P02671|FIBA_HUMAN		0	0	0	0	12400	12000	0	0	0	0	0	0	0	0	0	0	0	0	0	0	0	0	0	0	0	0	0	0
KIVRPADK	463.806	0.01	60	6.1	9.99			0	0	0	0	4870	14900	0	0	799	0	0	0	0	0	3840	0	0	0	0	0	0	0	0	0	0	0	0	0
KSSDHSEEDSDLEESDSIDDGEELAQ(+.98)SDT	1057.41	0.2	60	5.8	3.58		Deamidation (NQ)	0	3080	0	0	0	0	0	1850	3060	0	2140	0	1580	9200	0	3530	0	0	0	0	0	0	0	0	0	0	0	0
FVSETESRGSESGIFTNTKESSSHHPGIAEFPSRG	938.694	0.05	60	7.9	5.45	sp|P02671|FIBA_HUMAN		0	0	6240	0	0	0	0	9290	4890	1320	0	0	0	2700	0	0	0	0	0	0	0	0	0	0	0	0	0	0
KEVLKERKVLEKKVALSKKRK	635.163	0.06	60	2.3	10.46			0	0	7690	0	0	0	0	8410	8370	0	0	0	0	0	0	0	0	0	0	0	0	0	0	0	0	0	0	0
AGGGD	376.154	0.02	60	10.3	3.8			16700	0	0	0	0	0	0	0	372	1580	0	5430	0	0	0	427	0	0	0	0	0	0	0	0	0	0	0	0
PSSVAQSNFPQ(+.98)GSGASEM(+15.99)VSN(+.98)QP	1162.48	0.26	60	8.2	4		Deamidation (NQ); Oxidation (M)	7930	5620	0	5940	0	0	0	0	0	1610	0	900	0	1450	1210	0	0	0	0	0	0	0	0	0	0	0	0	0
AVPPNNSNAAEDDLPTVELQG	1076.01	0.02	60	5.3	3.43			0	0	0	0	0	24700	0	0	0	0	0	0	0	0	0	0	0	0	0	0	0	0	0	0	0	0	0	0
Q(-17.03)LGLPGPPDVPDHAAYHP	932.453	0.04	60	3.7	5.05		Pyro-glu from Q	6600	2550	0	0	0	6600	0	8970	0	0	0	0	0	0	0	0	0	0	0	0	0	0	0	0	0	0	0	0
RTATAELGWTANPASGWEEV	716.015	0.01	60	4.2	4.25			0	0	0	0	567	0	0	17000	2900	0	0	2740	0	0	0	0	1520	0	0	0	0	0	0	0	0	0	0	0
PPKPPLPEGEVPPPRPPPPEEKDEEFPEQ	814.659	0.01	60	5	4.22	sp|P18206|VINC_HUMAN		0	0	7750	0	0	15500	0	0	1520	0	0	0	0	0	0	0	0	0	0	0	0	0	0	0	0	0	0	0
YRGQSGSCVDVNECLTPGVCAHGKCT	671.798	0.02	60	4	6.72			12600	6620	0	0	0	0	0	1350	4230	0	0	0	0	0	0	0	0	0	0	0	0	0	0	0	0	0	0	0
DEDEEEDDEEEED	813.764	0.02	60	2.6	3.05			19700	0	0	0	0	0	0	0	0	0	0	0	0	0	5160	0	0	0	0	0	0	0	0	0	0	0	0	0
RKRTLLAKK	557.384	0.02	60	8.5	12.02			0	869	0	2900	0	0	338	0	0	617	0	0	0	0	0	119	20100	0	0	0	0	0	0	0	0	0	0	0
APAVGPRSQKQLELKVSELVQFLLIKDQKK	1131.01	0.02	60	10.4	9.82			6160	0	0	0	1580	0	1920	5640	1550	0	5240	0	0	0	1340	0	1520	0	0	0	0	0	0	0	0	0	0	0
KKVPQ	599.394	0.29	60	4.1	10			1550	0	1550	1060	1850	2400	1120	2400	1900	930	2070	1770	1160	1380	1430	1470	935	0	0	0	0	0	0	0	0	0	0	0
TCPPAEPSENRR	678.806	0.06	60	2.8	5.81			7210	0	0	0	0	0	9780	0	0	0	0	0	0	0	7990	0	0	0	0	0	0	0	0	0	0	0	0	0
VSGLKK	631.406	0.06	60	11.6	10			0	0	3260	2250	3040	3030	2280	0	0	0	0	1930	0	4840	0	1830	2650	0	0	0	0	0	0	0	0	0	0	0
PPKHPGVLK	486.817	0.2	60	4.6	10.02			0	777	2190	1110	2950	2800	1390	1260	0	1360	1410	258	1230	1620	0	5570	1290	0	0	0	0	0	0	0	0	0	0	0
AGPGLRKGLGLPLSPVRPRLPPPGALLWLQ	1042.97	0.03	60	4.3	12.3			8210	3580	0	0	0	0	3420	2990	1140	0	0	0	0	926	4970	0	0	0	0	0	0	0	0	0	0	0	0	0
KTKKQTTLAFKPIKKGKKRNPWS	905.206	0.03	60	6.5	11.51			0	1010	0	2090	0	16500	0	0	5700	0	0	0	0	0	0	0	0	0	0	0	0	0	0	0	0	0	0	0
LILPPRAGT	469.291	0.01	60	8.7	9.75			0	0	0	0	0	0	0	0	0	10600	0	14700	0	0	0	0	0	0	0	0	0	0	0	0	0	0	0	0
VSQLIPSKGDVDPSQTSMLKST	1159.58	0.11	60	8.2	5.93			0	0	0	1960	0	0	1990	0	0	0	0	0	0	0	902	7590	12900	0	0	0	0	0	0	0	0	0	0	0
KLRVRSRK	521.848	0.06	60	7.3	12.31			0	0	0	0	0	0	0	7690	0	0	4370	6500	0	0	0	0	6970	0	0	0	0	0	0	0	0	0	0	0
GSKGEQ(+.98)GFMGPPGPQ(+.98)GQPGLPGSPGHATEG	940.09	0.08	60	10	5.4		Deamidation (NQ)	0	0	2980	1180	5350	0	666	0	2620	849	256	0	3160	0	1300	1360	5850	0	0	0	0	0	0	0	0	0	0	0
RLLLAFQKK	558.863	0.03	60	15.6	11.17			11000	1110	0	0	0	0	0	0	0	2240	4300	0	0	0	6970	0	0	0	0	0	0	0	0	0	0	0	0	0
SGENGEIACSIPR	666.812	0.01	60	6	4.53			4260	0	0	5030	0	0	0	0	547	0	0	0	0	0	8690	7100	0	0	0	0	0	0	0	0	0	0	0	0
KAVLEEDEEVTEEAEMEPEDKGH	661.544	0.18	60	4.5	3.99			0	0	2590	0	0	0	0	0	2880	1610	0	4200	1610	3090	1450	1340	6880	0	0	0	0	0	0	0	0	0	0	0
GSKPEDM(+15.99)LWFHR	759.845	0.02	60	5.4	6.75		Oxidation (M)	10600	0	0	0	0	0	0	0	0	0	0	0	1580	0	0	13500	0	0	0	0	0	0	0	0	0	0	0	0
QSSRYGQ(+.98)QGSGSGQSPS	849.876	0.07	60	10.6	8.75		Deamidation (NQ)	1030	0	0	0	0	0	21200	0	0	0	0	0	3570	0	0	0	0	0	0	0	0	0	0	0	0	0	0	0
VMPSPKVSDTVVEPYN	881.439	0.08	60	9.6	4.37			0	0	0	0	0	0	0	1700	1570	552	0	4550	3300	1610	0	2520	10000	0	0	0	0	0	0	0	0	0	0	0
S(+42.01)QKQEEENPAEETGEEKQDTQEKEGILPERAEEAKL	834.596	0.02	60	9	4.24		Acetylation (Protein N-term)	0	0	0	0	0	0	0	4520	6270	2430	2350	3400	0	1840	0	5260	0	0	0	0	0	0	0	0	0	0	0	0
PKVSPKLAPPKAG	645.402	0.12	60	3.8	10.31			2580	0	0	2590	0	0	1880	0	2950	2770	3920	0	2350	3770	0	3430	0	0	0	0	0	0	0	0	0	0	0	0
KKVRRKIRNKQSAQDSRRRKK	667.413	0.01	60	10.8	12.31			22300	3120	0	0	0	0	0	0	0	857	0	0	0	0	0	0	0	0	0	0	0	0	0	0	0	0	0	0
KEQEDLQENDEEGSEDEASETDYSSAD	1017.07	0.12	60	6.5	3.4			4040	0	0	0	0	10200	0	0	2890	0	0	9150	0	0	0	0	0	0	0	0	0	0	0	0	0	0	0	0
MAGAASPCAN(+.98)GCGPGAPS	380.65	0.01	60	1.7	5.27		Deamidation (NQ)	0	760	0	6290	0	0	1650	0	0	0	767	0	5140	0	11700	0	0	0	0	0	0	0	0	0	0	0	0	0
CSTDGRMQSN(+.98)CSLGGVGMMCSLSEQ(+.98)GK	692.784	0.11	60	5.8	6.05		Deamidation (NQ)	0	1120	2990	0	0	2160	0	2900	1940	1320	0	0	2410	2460	0	3030	6010	0	0	0	0	0	0	0	0	0	0	0
ESRSPLEDETDN(+.98)TWMFKDSTE	630.275	0.1	60	5.1	3.95		Deamidation (NQ)	0	2410	0	0	0	0	2390	0	4060	2830	0	4520	3550	3100	3770	0	0	0	0	0	0	0	0	0	0	0	0	0
SSGPGALA	659.34	0.09	60	4.7	5.24			0	0	0	13900	0	0	0	0	0	4370	0	0	0	0	0	0	8490	0	0	0	0	0	0	0	0	0	0	0
KGAGLDVKALRAFRVLRPLRLVSGV	897.888	0.04	60	8.5	12.01			12000	473	5460	25.5	0	0	3280	0	0	0	0	0	1910	0	3720	0	0	0	0	0	0	0	0	0	0	0	0	0
LKGALLFITIALIGTGWAFIKHILSDKDKKIF	893.545	0.01	60	6.5	9.83			0	7620	3710	0	0	0	0	1890	0	0	0	1590	0	2160	0	6590	3310	0	0	0	0	0	0	0	0	0	0	0
Q(-17.03)GVNDN(+.98)EEGFFS	663.761	0.05	60	6.3	3.57	sp|P02675|FIBB_HUMAN	Pyro-glu from Q; Deamidation (NQ)	1280	0	1370	1830	0	1140	3180	0	0	0	1380	1090	1180	0	3040	9440	1950	0	0	0	0	0	0	0	0	0	0	0
CTIRRLARHGGVKRILG	953.57	0.01	60	6.2	12			0	0	0	0	0	25100	0	0	1810	0	0	0	0	0	0	0	0	0	0	0	0	0	0	0	0	0	0	0
Q(-17.03)GGGT	402.155	0.07	60	2.2	5.52		Pyro-glu from Q	0	0	0	6050	0	0	0	0	0	15000	5950	0	0	0	0	0	0	0	0	0	0	0	0	0	0	0	0	0
EHAKLEEQ(+.98)LQHAKFEITECFISD	916.112	0.11	60	8.4	4.68		Deamidation (NQ)	0	0	0	0	0	4530	0	0	2030	0	0	7590	2000	0	0	5230	5630	0	0	0	0	0	0	0	0	0	0	0
SSSYSKQFTSSTSYNRGDSTFESKSYKMADEAGSEADHEGTHSTKRGHAKSRPV	1181.14	0.05	60	3.2	8.07	sp|P02671|FIBA_HUMAN		16700	2350	0	0	0	0	0	5210	0	2780	0	0	0	0	0	0	0	0	0	0	0	0	0	0	0	0	0	0
Q(-17.03)FTSSTSYN(+.98)RGDSTFESKSYKMADEAGSEADHEGTHSTKRGHAKSRPV	1050.08	0.19	60	5.6	7.03	sp|P02671|FIBA_HUMAN	Pyro-glu from Q; Deamidation (NQ)	756	763	1120	3300	1930	1570	4030	0	0	0	0	1080	653	0	0	2690	9230	0	0	0	0	0	0	0	0	0	0	0
QGLIN(+.98)CLKEILVPGPRHPETSPSFLPPLPSL	1117.63	0.13	60	6.8	6.75		Deamidation (NQ)	0	0	0	0	0	0	0	0	7570	0	0	0	4910	0	0	14800	0	0	0	0	0	0	0	0	0	0	0	0
QQHFWTSASEGPSRCPAM(+15.99)TVLPSE	666.316	0.03	60	5.6	5.4		Oxidation (M)	0	0	2370	0	5190	4200	0	0	0	0	0	2240	1200	0	0	5980	6120	0	0	0	0	0	0	0	0	0	0	0
LTSEEAERSDGDPVQPAVLQVHQTS	898.435	0.09	60	5.9	4.17			0	0	3610	0	0	2580	0	2240	2300	908	0	4250	1050	2740	0	2270	5400	0	0	0	0	0	0	0	0	0	0	0
SSATK	493.272	0.04	60	2.5	8.47			3390	24000	0	0	0	0	0	0	0	0	0	0	0	0	0	0	0	0	0	0	0	0	0	0	0	0	0	0
QSGAAPGAPSLSFTVQV	808.902	0.03	60	11.5	5.52			0	2090	0	0	0	0	0	0	2110	5790	610	10400	0	0	0	0	6400	0	0	0	0	0	0	0	0	0	0	0
KQFTSSTSYNRGDSTFES	681.308	0.05	60	7.3	6.07	sp|P02671|FIBA_HUMAN		6530	0	0	1690	3020	0	705	0	0	0	1190	2410	1680	0	0	10200	0	0	0	0	0	0	0	0	0	0	0	0
VRALIKKY	495.823	0.09	60	7.8	10.29			3430	3040	2840	1370	2470	0	0	0	0	2100	3530	3500	0	1180	1800	0	2320	0	0	0	0	0	0	0	0	0	0	0
KFSPGAPGGSGSQPNQKLGHPEAL	591.053	0.02	60	9	8.6	sp|Q15942|ZYX_HUMAN		0	0	0	0	8630	6600	0	0	0	0	0	0	0	0	0	4070	8350	0	0	0	0	0	0	0	0	0	0	0
PDMHADMHADMPMGPGMN(+.98)PGPPM(+15.99)GPGGPP	971.725	0.17	60	7.6	4.4		Deamidation (NQ); Oxidation (M)	0	0	0	0	6940	0	1600	0	0	1160	1950	3160	2760	0	0	4810	5290	0	0	0	0	0	0	0	0	0	0	0
SSSYSKQFTSSTSYNRGDSTFESKSYKMADEAG	909.151	0.05	60	6.6	5.94	sp|P02671|FIBA_HUMAN		7070	0	0	0	0	0	5550	0	3670	0	0	3810	3360	4220	0	0	0	0	0	0	0	0	0	0	0	0	0	0
STQTMVTQQTIKTESSSTN(+.98)GAVVKDETSLTT	655.721	0.07	60	5.2	4.68		Deamidation (NQ)	0	0	11400	0	0	0	0	10300	6020	0	0	0	0	0	0	0	0	0	0	0	0	0	0	0	0	0	0	0
TVALLIGLLFFL	660.424	0.04	60	8	5.19			9340	15400	0	0	0	0	0	0	0	0	0	0	0	0	2980	0	0	0	0	0	0	0	0	0	0	0	0	0
RPGVLSSRQLGLPGPPDVPDHAA	584.811	0.02	60	8	6.75			0	0	6650	0	0	0	0	18100	2980	0	0	0	0	0	0	0	0	0	0	0	0	0	0	0	0	0	0	0
GAAGLLALLLLLLLLLLGLGGRVEGG	829.195	0.1	60	6.2	6			3070	0	7660	1490	5240	0	0	0	5570	1310	0	0	0	0	741	2770	0	0	0	0	0	0	0	0	0	0	0	0
QKGSPGSSQGTACAGTQ(+.98)PGAQ(+.98)PGAQPGASP	894.731	0.04	60	10.7	8.22		Deamidation (NQ)	3660	0	0	0	0	0	666	0	1670	0	0	4110	2020	0	153	14100	1610	0	0	0	0	0	0	0	0	0	0	0
QDCAETCDCAPDARCFPANGACLCEHGFT	762.808	0.04	60	10.6	4.1			17400	0	1720	0	0	0	0	0	0	198	0	0	0	0	5910	1590	1180	0	0	0	0	0	0	0	0	0	0	0
TCHGGEPEMCVAALCERPQ(+.98)GCQQ(+.98)YR	554.429	0.13	60	5.4	5.46		Deamidation (NQ)	0	0	5070	0	0	2710	0	0	2520	1720	2280	4270	1510	0	0	1770	6260	0	0	0	0	0	0	0	0	0	0	0
DM(+15.99)AEAN(+.98)AHGEENGV	730.778	0.02	60	4.2	4		Oxidation (M); Deamidation (NQ)	0	0	2430	0	0	0	0	0	0	783	0	0	243	24700	0	0	0	0	0	0	0	0	0	0	0	0	0	0
GVKGDLGLPGLPGAPGVVG	830.477	0.01	60	9.8	5.84			7330	0	0	0	0	0	0	0	0	0	0	0	0	6310	641	0	13900	0	0	0	0	0	0	0	0	0	0	0
HGKN(+.98)LVAILHL	1215.74	0.06	60	6.9	8.76		Deamidation (NQ)	1280	1080	3250	0	106	965	5560	2420	465	1520	1130	0	0	600	7250	0	2690	0	0	0	0	0	0	0	0	0	0	0
VAAAVASEAVGSLRVAEGGPNT	676.028	0.01	60	2.6	4.53			23200	0	0	0	0	0	0	0	0	0	0	0	0	0	5120	0	0	0	0	0	0	0	0	0	0	0	0	0
QAQALRVSLTPQ(+.98)QAQELGIPLTPQQAQA	747.399	0.01	60	7.8	6		Deamidation (NQ)	0	0	0	0	13400	0	0	0	0	0	0	0	0	0	0	0	15100	0	0	0	0	0	0	0	0	0	0	0
FTFDNVLPGK	569.303	0.05	60	6.8	5.84			0	0	2310	0	3770	2360	0	0	4110	1550	2810	2640	1580	0	0	4380	3080	0	0	0	0	0	0	0	0	0	0	0
NPTGGADEWQM(+15.99)	611.236	0.11	60	7	3.67		Oxidation (M)	2140	0	988	0	2210	477	0	0	2430	368	0	1230	2610	2080	3080	9300	1730	0	0	0	0	0	0	0	0	0	0	0
AIAAAITFLILFTIFGNALVILAV	1238.25	0.11	60	11	5.57			0	4760	390	2690	4150	0	4780	2580	1580	1770	47	616	1020	1390	0	2890	0	0	0	0	0	0	0	0	0	0	0	0
LPLSSIQQNSSEAQ(+.98)LPSNGTGP	742.7	0.02	60	7.6	4		Deamidation (NQ)	0	0	6050	0	7690	6680	0	0	2480	0	0	0	980	0	0	0	4850	0	0	0	0	0	0	0	0	0	0	0
SQPNQKLGHPEALSAGTGSPQPPSFTY	932.789	0.04	60	13.3	6.47	sp|Q15942|ZYX_HUMAN		6590	0	0	0	0	0	0	3990	2070	0	1870	0	1770	0	0	0	12500	0	0	0	0	0	0	0	0	0	0	0
QRTQALRGGQRLEIQ	585.33	0.01	60	9.6	11.7			0	0	0	0	0	28800	0	0	0	0	0	0	0	0	0	0	0	0	0	0	0	0	0	0	0	0	0	0
RAGLAKVIPPK	575.383	0.08	60	3.5	11.17			3580	5220	0	1520	0	4600	0	2650	0	0	0	0	3910	0	2550	4780	0	0	0	0	0	0	0	0	0	0	0	0
EAGSPGAPGQ(+.98)DGTRGEPG	547.581	0.23	60	2.5	4.14	sp|Q96P44|COLA1_HUMAN	Deamidation (NQ)	0	0	9340	0	9940	7430	0	2150	0	0	0	0	0	0	0	0	0	0	0	0	0	0	0	0	0	0	0	0
KPLPSEGSLAEADHTAHEEM(+15.99)EAHTTVKEAEDDNIS	761.741	0.04	60	11.6	4.34		Oxidation (M)	0	0	8430	0	4600	4760	0	4900	6220	0	0	0	0	0	0	0	0	0	0	0	0	0	0	0	0	0	0	0
KPTKPAASDLPVPAEGVRNI	515.792	0.04	60	5.9	8.59			0	0	6970	0	9310	8780	0	1040	0	0	0	0	0	0	0	0	2890	0	0	0	0	0	0	0	0	0	0	0
VATVENEEPSPCARTGSGRRCTIN(+.98)GSE	941.079	0.03	60	6.3	4.95		Deamidation (NQ)	4230	0	0	0	0	10600	0	0	0	0	0	0	0	2860	0	11400	0	0	0	0	0	0	0	0	0	0	0	0
GEGPSAN	631.249	0.01	60	7.4	4			0	0	0	0	0	0	0	0	0	0	0	29100	0	0	0	0	0	0	0	0	0	0	0	0	0	0	0	0
HEVGLKKRVVQVWFQNTRARERKGQ	1017.23	0.1	60	3.5	11.57			2960	0	0	0	7120	0	0	6190	0	1960	0	0	0	0	0	0	10900	0	0	0	0	0	0	0	0	0	0	0
FSPGAPGGSGSQPNQKLGHPEALSAGTG	869.419	0.07	60	5.7	6.75	sp|Q15942|ZYX_HUMAN		0	0	6460	0	4480	6070	0	0	0	0	0	0	0	2350	0	1420	8390	0	0	0	0	0	0	0	0	0	0	0
Q(-17.03)EKPSSPSPMPSSTPSPSLN	679.986	0.01	60	3.1	6		Pyro-glu from Q	0	0	7060	0	3180	5080	0	2360	2560	0	0	0	0	2390	0	0	6680	0	0	0	0	0	0	0	0	0	0	0
HTLNSTSMSKAYQSTFTGETNTPY	889.386	0.01	60	9.7	6.75			10900	0	0	4530	0	0	2320	0	0	0	0	9490	0	0	2130	0	0	0	0	0	0	0	0	0	0	0	0	0
ASEGGFTATGQRQLRPEHFQEVGYAAPPSPPLS	871.427	0.06	60	10.1	5.5			7970	1820	0	2990	0	0	2490	4460	2680	1940	0	5030	0	0	0	0	0	0	0	0	0	0	0	0	0	0	0	0
SVSENLLKEAIRAIFPSRGLARLALQFTTNPKRLQQNLFGGKFLVNVGQ	1088.84	0.02	60	9.5	11.57			0	0	0	5930	0	11800	0	6220	3920	0	0	0	0	0	1520	0	0	0	0	0	0	0	0	0	0	0	0	0
M(+42.01)DHYDSQQTNDY	779.79	0.1	60	6.8	3.93		Acetylation (Protein N-term)	0	0	3040	3870	0	3180	0	1200	0	0	0	0	0	6160	0	0	12000	0	0	0	0	0	0	0	0	0	0	0
YQPSYGQG	899.384	0.02	60	4.7	5.52			12400	0	1760	0	0	0	0	0	0	0	0	0	0	0	1630	0	14000	0	0	0	0	0	0	0	0	0	0	0
DTDLEALFN(+.98)SVM(+15.99)	686.317	0.02	60	10.4	3.49		Deamidation (NQ); Oxidation (M)	22000	0	0	1690	0	0	0	0	0	0	0	0	1520	0	0	4620	0	0	0	0	0	0	0	0	0	0	0	0
S(+42.01)ACPGTCFSQ(+.98)E	586.71	0.13	60	3.7	4		Acetylation (Protein N-term); Deamidation (NQ)	12700	0	0	4330	0	0	7190	0	0	0	0	5640	0	0	0	0	0	0	0	0	0	0	0	0	0	0	0	0
TLIRKVFN	495.808	0.09	60	5.5	11			2710	0	2380	0	3570	4090	0	2230	0	2090	4420	2550	0	1630	1800	2460	0	0	0	0	0	0	0	0	0	0	0	0
LVEGEIAEEAAEKATS	823.905	0.04	60	3.4	3.98			0	0	3270	0	0	0	0	3680	5890	2530	1460	4650	1590	0	0	0	6860	0	0	0	0	0	0	0	0	0	0	0
FGRKKVREGESHAENETKSEDLPSS	564.277	0.01	60	11.6	5.65			0	0	2620	0	6860	14000	0	0	0	0	0	3720	0	0	0	0	2830	0	0	0	0	0	0	0	0	0	0	0
NEATGGKYVPRAILVD	568.307	0.04	60	2.1	6.07			0	0	0	0	5890	0	0	0	0	0	0	0	904	4480	0	0	18800	0	0	0	0	0	0	0	0	0	0	0
YSKQFTSSTSYNRGDSTFESKSYKMADEAGSEADHEGTHST	905.591	0.02	60	13.6	5.01	sp|P02671|FIBA_HUMAN		0	0	4640	0	0	11100	0	9440	5070	0	0	0	0	0	0	0	0	0	0	0	0	0	0	0	0	0	0	0
Q(-17.03)RDPVGRYEPAGGDANRL	651.989	0.02	60	4.4	6.12		Pyro-glu from Q	0	0	5940	0	5960	6860	0	0	0	0	0	0	0	5260	0	0	6450	0	0	0	0	0	0	0	0	0	0	0
Q(-17.03)AHGDEGCGACGGV	415.153	0.09	60	3	4.35		Pyro-glu from Q	16300	0	0	0	0	0	0	0	0	2920	3580	0	0	0	7760	0	0	0	0	0	0	0	0	0	0	0	0	0
TTPSPGGALSPSGQPSSSATEVVLRTRTASEG	1029.18	0.08	60	7.2	5.81			0	0	0	0	0	0	0	1460	4510	3100	2510	10800	0	0	0	0	8180	0	0	0	0	0	0	0	0	0	0	0
Q(+.98)AIQ(+.98)MACQ(+.98)SLGEPGCT	547.215	0.01	60	6.4	4		Deamidation (NQ)	0	0	0	0	0	0	0	0	0	285	0	4990	0	0	25400	0	0	0	0	0	0	0	0	0	0	0	0	0
SLGVIGALVK	478.804	0.16	60	10.1	8.47			1480	1940	3300	1570	1620	4150	900	2080	1790	0	1740	1300	1760	0	1320	2840	2930	0	0	0	0	0	0	0	0	0	0	0
Q(-17.03)ACFDNDECSAQ(+.98)	657.709	0.11	60	4.7	3.49		Pyro-glu from Q; Deamidation (NQ)	21900	2990	0	0	0	0	0	0	0	3250	0	0	1290	0	0	1310	0	0	0	0	0	0	0	0	0	0	0	0
QFLKTLTGVLPERQ(+.98)KLLGLKVKGK	899.216	0.02	60	2.8	10.58		Deamidation (NQ)	0	0	0	0	0	0	0	9750	0	0	0	0	0	0	13700	7320	0	0	0	0	0	0	0	0	0	0	0	0
KKIAIRNVS	514.831	0.14	60	9.1	11.17			0	2250	2290	1960	0	0	0	2050	2840	867	2150	1430	3880	3290	0	4860	2980	0	0	0	0	0	0	0	0	0	0	0
QKFEPSISM(+15.99)CHQGLM(+15.99)SFEGFARFLM(+15.99)DKENFASKNDESQENIKELQ	1064.06	0.04	60	8.1	4.84		Oxidation (M)	0	2700	0	0	0	0	0	0	0	0	0	0	0	0	2630	16200	9520	0	0	0	0	0	0	0	0	0	0	0
SSGGSSSDET	457.166	0.16	60	3.9	3.67			13600	0	0	4720	0	0	0	0	0	1400	0	0	0	3780	7760	0	0	0	0	0	0	0	0	0	0	0	0	0
RRRLPLAN	498.316	0.07	60	10.2	12.3			1910	0	880	1600	0	3760	0	0	0	0	15000	0	2620	5510	0	0	0	0	0	0	0	0	0	0	0	0	0	0
EKAYHEQLSVAEITN	577.956	0.11	60	4.1	4.75	sp|P68366|TBA4A_HUMAN		2330	0	0	816	0	0	0	0	0	2460	2740	7700	3500	0	2000	3410	6470	0	0	0	0	0	0	0	0	0	0	0
GSDPSSMETRAHYNSSNKSYTLNGTK	708.835	0.03	60	4.5	8.44			0	0	0	0	12400	4040	0	964	0	0	0	0	559	0	0	8580	4890	0	0	0	0	0	0	0	0	0	0	0
QDPGGM(+15.99)SM(+15.99)SPMKSMTAGGM(+15.99)QMNSPT	869.677	0.07	60	5.9	5.84		Oxidation (M)	5520	0	0	0	0	7030	9910	0	0	0	0	0	0	0	0	8990	0	0	0	0	0	0	0	0	0	0	0	0
SYKMADEAGSEADHEGTHST	531.47	0.11	60	3.4	4.49	sp|P02671|FIBA_HUMAN		7530	1320	2230	893	0	5400	260	2290	1590	771	864	0	0	1930	293	6130	0	0	0	0	0	0	0	0	0	0	0	0
KKKKKKDKHSKKAKKEKKKKSKKQ	738.479	0.01	60	5	10.67			1160	0	0	0	0	0	470	27500	0	0	0	2420	0	0	0	0	0	0	0	0	0	0	0	0	0	0	0	0
KKLLAVPAA	455.812	0.07	60	7.9	10			3020	0	0	0	0	0	3800	0	0	6230	2000	0	0	0	0	0	16600	0	0	0	0	0	0	0	0	0	0	0
ESGSCCTT	787.25	0.05	60	7.5	4			23200	0	0	0	0	0	0	0	0	4960	0	0	0	0	0	3690	0	0	0	0	0	0	0	0	0	0	0	0
AEDDLPTVELQGVVPR	579.972	0.02	60	7.8	3.92			0	0	11500	0	0	0	0	14300	6070	0	0	0	0	0	0	0	0	0	0	0	0	0	0	0	0	0	0	0
GAHCTDAVN(+.98)GYTCICPEGYSGLF	595.499	0.08	60	3.9	4.35		Deamidation (NQ)	0	0	0	0	0	14200	0	0	0	0	1600	0	0	0	0	11200	5000	0	0	0	0	0	0	0	0	0	0	0
MVLKIIAFKPK	644.409	0.12	60	4.2	10.3			1730	2970	1590	2260	0	4640	0	0	906	1250	2570	1710	0	3820	1280	3460	3900	0	0	0	0	0	0	0	0	0	0	0
EGMEEGEFSEAREDM	873.332	0.19	60	7	3.77	sp|P68366|TBA4A_HUMAN		0	0	3410	0	0	3280	0	1600	1670	246	0	5190	1980	2970	1510	0	10300	0	0	0	0	0	0	0	0	0	0	0
SSSYSKQ(+.98)FTSSTSYNRGDSTFESKSY	733.826	0.02	60	3.6	8.1	sp|P02671|FIBA_HUMAN	Deamidation (NQ)	0	0	0	0	0	0	0	1030	3120	0	0	0	0	11900	0	13300	2960	0	0	0	0	0	0	0	0	0	0	0
STIPIVGIVAGLAVLVVTVAVVAVVAAVMCRRKS	1121.34	0.05	60	8.3	10.86			7230	3940	4950	0	0	606	0	0	797	1870	2690	2830	4360	0	3100	0	0	0	0	0	0	0	0	0	0	0	0	0
ALTSEEAERSDGDPVQPAVLQ	738.026	0.03	60	4.5	3.83			0	0	0	0	9390	8140	0	2020	231	1130	2390	6040	0	3110	0	0	0	0	0	0	0	0	0	0	0	0	0	0
HVQPQPQPKPQVQLHVQ	497.776	0.14	60	1.8	8.76	sp|Q15942|ZYX_HUMAN		0	1050	0	0	0	0	0	0	1460	3760	2080	9960	0	2940	2340	3410	5560	0	0	0	0	0	0	0	0	0	0	0
QSEKPDEN(+.98)EKAFQCLSKAYKCDT	888.398	0.08	60	6.2	4.94		Deamidation (NQ)	9260	1620	0	1540	0	0	1280	0	4150	3120	3330	0	3040	0	2320	2940	0	0	0	0	0	0	0	0	0	0	0	0
M(+42.01)AGSGGLGGGAGGGQGAGAG	496.884	0.01	60	1.9	5.28		Acetylation (Protein N-term)	0	0	0	21400	0	0	0	0	0	9370	1860	0	0	0	0	0	0	0	0	0	0	0	0	0	0	0	0	0
Q(-17.03)GVNDN(+.98)EEGFF	1239.48	0.09	60	6.7	3.57	sp|P02675|FIBB_HUMAN	Pyro-glu from Q; Deamidation (NQ)	1140	0	2280	0	3050	6800	2320	728	1400	128	512	0	0	7180	2530	0	4570	0	0	0	0	0	0	0	0	0	0	0
DSTFESKSY	532.232	0.09	60	1.5	4.37	sp|P02671|FIBA_HUMAN		0	8010	0	6140	0	0	3960	3610	2520	2920	939	0	1300	3290	0	0	0	0	0	0	0	0	0	0	0	0	0	0
PNSSIKNQTILKKGKREN(+.98)IVNIRKQ	969.93	0.02	60	8.7	11.22		Deamidation (NQ)	10200	0	0	0	0	2290	0	7060	4910	0	0	4170	0	1100	0	428	2570	0	0	0	0	0	0	0	0	0	0	0
QPPPPQ(+.98)PPSLNKTVSN(+.98)GELPAGPQG	837.074	0.02	60	5.4	6		Deamidation (NQ)	0	0	0	0	3940	10500	0	0	0	0	0	0	0	0	18300	0	0	0	0	0	0	0	0	0	0	0	0	0
TLRKVSKK	480.324	0.19	60	5.9	11.26			0	0	5450	0	3480	3850	1950	2710	3180	0	2350	2520	2620	2370	2330	0	0	0	0	0	0	0	0	0	0	0	0	0
MTGSSGDIFES	565.726	0.11	60	5.2	3.67			0	291	0	12600	0	0	11300	0	0	0	0	0	1110	0	7560	0	0	0	0	0	0	0	0	0	0	0	0	0
DYYCACPDDFGGKNCSVPREPCPGGA	907.701	0.06	60	10.6	4.23			0	0	3030	1120	0	5310	0	0	0	3760	0	16200	0	918	0	0	2560	0	0	0	0	0	0	0	0	0	0	0
HPGLVLILGKLILLHH	887.057	0.05	60	7.1	8.77			0	1680	0	2890	0	0	2240	0	1560	2300	1520	4170	0	0	0	16600	0	0	0	0	0	0	0	0	0	0	0	0
GAPGPLTLKEVEELE	791.418	0.04	60	5.1	4.09	sp|Q15942|ZYX_HUMAN		0	0	3310	0	0	4820	0	4380	2710	1020	3990	0	951	2700	3150	0	5930	0	0	0	0	0	0	0	0	0	0	0
HRPHVPFRDSQLTRLLQ(+.98)PALGPGTTAVLLLQVGAGAGQ	994.086	0.07	60	13	11.7		Deamidation (NQ)	9310	1330	0	0	0	0	7950	0	0	0	0	0	0	0	2220	0	12300	0	0	0	0	0	0	0	0	0	0	0
RDQRAVAGPALRRWLLLGTVTVGFLAQSVLAG	848.768	0.01	60	0.8	12			0	5280	0	0	0	0	22800	0	0	0	0	0	0	0	5060	0	0	0	0	0	0	0	0	0	0	0	0	0
KAKPKPPK	447.299	0.09	60	5.3	10.48			0	3930	0	0	0	1270	4490	4170	2890	2190	3180	1390	0	728	1750	0	7170	0	0	0	0	0	0	0	0	0	0	0
DDDEEMKN(+.98)QCFGGEYM(+15.99)GEVFDHMM	719.268	0.05	60	5.2	3.84		Deamidation (NQ); Oxidation (M)	10400	3270	0	6410	0	0	4010	0	0	0	0	0	4630	0	0	0	4500	0	0	0	0	0	0	0	0	0	0	0
CASDLEEYDAQ(+.98)EGHC	835.786	0.01	60	8	3.83		Deamidation (NQ)	13000	0	0	0	0	0	0	0	0	0	0	0	0	0	20400	0	0	0	0	0	0	0	0	0	0	0	0	0
KLASGPLAAPAQPRPLRSLSPSVRQ(+.98)LSR	985.599	0.03	60	4.9	12.48		Deamidation (NQ)	0	0	10900	0	0	1490	0	1520	3900	0	2020	1880	0	7440	0	4260	0	0	0	0	0	0	0	0	0	0	0	0
GDLEPAEGRGR	578.782	0.22	60	3.2	4.68			15100	1380	0	2980	0	0	3650	0	0	0	0	3570	1230	0	5520	0	0	0	0	0	0	0	0	0	0	0	0	0
E(-18.01)CHEGCVCDEGF	437.142	0.1	60	5	4		Pyro-glu from E	11000	0	0	7040	0	0	6560	0	0	2390	0	5300	1180	0	0	0	0	0	0	0	0	0	0	0	0	0	0	0
SEYQTFFNPR	644.8	0.09	60	4.9	5.72			0	0	0	0	0	0	0	0	0	0	0	3190	2310	10100	0	7830	10100	0	0	0	0	0	0	0	0	0	0	0
KTVVLLADKK	557.862	0.15	60	4.2	9.7			4350	1390	2780	0	3270	3630	0	0	0	2870	3330	4140	0	0	2890	2790	2150	0	0	0	0	0	0	0	0	0	0	0
KCTKCQCNGHADTCN(+.98)EQDGTGCPCQN	920.322	0.21	60	5.9	5.38		Deamidation (NQ)	0	2550	6280	0	2650	4290	0	8810	0	0	2100	0	1740	2720	2500	0	0	0	0	0	0	0	0	0	0	0	0	0
D(+42.01)SGEGDFLAEGGGV	676.284	0.15	60	3.4	3.43	sp|P02671|FIBA_HUMAN	Acetylation (Protein N-term)	9330	6620	0	0	0	0	3180	0	0	0	0	4930	3900	2480	0	3220	0	0	0	0	0	0	0	0	0	0	0	0
GAKGN(+.98)VGPPGEPGPPGQQGNHGSQGLPGPQ(+.98)G	567.268	0.09	60	5.1	6.75		Deamidation (NQ)	4330	0	0	0	8850	4910	0	2180	0	0	0	0	0	0	0	13700	0	0	0	0	0	0	0	0	0	0	0	0
QPPSSLVIDKESEVY	845.93	0.04	60	7.4	4.14	sp|O00151|PDLI1_HUMAN		0	0	0	0	0	0	0	0	0	2050	0	5560	0	8910	0	0	17500	0	0	0	0	0	0	0	0	0	0	0
SPSNPAALPVASDSSPM(+15.99)GSKTKET	594.539	0.08	60	5.5	5.79		Oxidation (M)	0	0	0	0	6500	8240	0	0	0	0	0	0	0	4760	0	5210	9510	0	0	0	0	0	0	0	0	0	0	0
EQ(+.98)ETFMLDEPLERTTN(+.98)SSHANGAA	884.056	0.05	60	4.8	4.25		Deamidation (NQ)	11500	0	7150	3010	0	0	2870	0	0	0	0	0	0	5600	4300	0	0	0	0	0	0	0	0	0	0	0	0	0
QNIDVSSQ(+.98)DLSGQTAREYAVSSHHH	692.576	0.01	60	7.2	5.73		Deamidation (NQ)	0	0	9630	0	0	0	22100	0	0	0	0	0	0	0	0	0	2790	0	0	0	0	0	0	0	0	0	0	0
KPAKVAVTK	471.314	0.07	60	9.9	10.3			0	0	0	0	0	0	0	7450	5680	0	4120	11900	3780	0	0	1620	0	0	0	0	0	0	0	0	0	0	0	0
GPPASSPAPAPKFSPVTPKFTPVAS	812.433	0.1	60	6	10	sp|Q15942|ZYX_HUMAN		0	0	5460	0	0	0	0	0	0	3330	0	0	2790	12300	0	0	10800	0	0	0	0	0	0	0	0	0	0	0
STQ(+.98)AQSVPVIN(+.98)SMGSSLTTLQPVQ(+.98)FSQP	587.894	0.02	60	5.1	5.24		Deamidation (NQ)	0	0	6660	0	7380	10000	0	0	0	0	0	0	0	3320	0	7320	0	0	0	0	0	0	0	0	0	0	0	0
TTKKKK	733.486	0.15	60	5.7	10.48			4060	0	0	2650	0	0	0	0	315	0	6940	4350	4250	3220	4070	0	4890	0	0	0	0	0	0	0	0	0	0	0
S(+42.01)DKPDM(+15.99)AEIEKFD	791.849	0.03	60	8.6	4.1	sp|P62328|TYB4_HUMAN	Acetylation (Protein N-term); Oxidation (M)	0	0	4790	0	7430	4430	0	1590	0	0	0	0	0	4100	0	3040	9460	0	0	0	0	0	0	0	0	0	0	0
SVPN(+.98)GPSPEEVEQQKRQQPGPSEHIERRVSNAG	725.762	0.1	60	3.2	5.6		Deamidation (NQ)	0	0	0	0	0	0	0	0	497	251	0	13500	265	16400	504	0	3490	0	0	0	0	0	0	0	0	0	0	0
KSAWIRDYSSGGSSRTLDAQ(+.98)D	1151.01	0.31	60	5.6	6.04		Deamidation (NQ)	12400	0	0	0	0	0	3460	0	0	7620	0	1220	0	0	5240	5170	0	0	0	0	0	0	0	0	0	0	0	0
TEFMQDPDEEHLKKSSQVPRTE	527.054	0.03	60	8.8	4.64	sp|Q9NR12|PDLI7_HUMAN		0	0	20800	0	2440	0	0	0	0	0	0	0	0	9020	0	2850	0	0	0	0	0	0	0	0	0	0	0	0
KKKKQRTSSK	609.89	0.15	60	8.6	11.39			2090	0	1040	0	3260	4540	1930	2810	2910	1690	0	4340	3250	3610	1460	0	2240	0	0	0	0	0	0	0	0	0	0	0
KTSLHMCDGRSPTPDELPTCYP	612.773	0.09	60	4.5	5.38			0	0	8540	0	7770	7940	0	0	0	0	0	0	0	0	0	0	11000	0	0	0	0	0	0	0	0	0	0	0
TM(+15.99)QVSHSQ(+.98)VQEPGGVPQVFLT	762.725	0.01	60	7	5.21		Oxidation (M); Deamidation (NQ)	1160	0	0	0	0	994	0	0	0	32000	0	0	0	0	1250	0	0	0	0	0	0	0	0	0	0	0	0	0
TPVGG	430.235	0.01	60	10.5	5.19			0	0	0	5570	0	0	0	0	6420	4090	9940	3270	6200	0	0	0	0	0	0	0	0	0	0	0	0	0	0	0
KIFVLI	732.502	0.15	60	5.9	8.75			3150	0	0	3010	3480	3000	736	4680	1940	2650	5530	504	664	577	524	4460	680	0	0	0	0	0	0	0	0	0	0	0
MDAPQ	561.233	0.28	60	4.3	3.8			0	0	4180	0	0	0	0	8350	3730	1500	2440	0	4480	1530	0	9680	0	0	0	0	0	0	0	0	0	0	0	0
GQ(+.98)TEDVATGPRRAEKTSVATST	566.519	0.07	60	2.5	6.18		Deamidation (NQ)	11800	0	6850	0	0	0	0	0	6340	0	0	0	0	10900	0	0	0	0	0	0	0	0	0	0	0	0	0	0
DSGEGDFLAEGGG	605.745	0.32	60	3.4	3.43	sp|P02671|FIBA_HUMAN		4310	2610	0	0	0	0	5660	0	0	0	3320	6160	1860	0	6360	0	5690	0	0	0	0	0	0	0	0	0	0	0
MLGEFVSETESRGSESGIFTNTKESSSHHPGIAEFPSRG	837.192	0.01	60	6.2	5.06	sp|P02671|FIBA_HUMAN		0	0	0	0	0	0	0	22400	13600	0	0	0	0	0	0	0	0	0	0	0	0	0	0	0	0	0	0	0
VELQDMSLLSIQQQEGVQ(+.98)VVVQ(+.98)QP	675.095	0.06	60	5.1	3.57		Deamidation (NQ)	0	0	8360	0	8140	6950	0	0	0	0	0	0	0	3740	0	0	8920	0	0	0	0	0	0	0	0	0	0	0
LLVLITGGK	457.32	0.06	60	5.1	8.75			0	0	0	0	4680	6000	6150	0	5540	0	0	3180	5280	0	2600	0	2760	0	0	0	0	0	0	0	0	0	0	0
SGSGEDGDCEQ(+.98)ELC	715.256	0.04	60	4.6	3.39		Deamidation (NQ)	7120	3260	0	0	0	0	0	11400	8040	2430	0	3960	0	0	0	0	0	0	0	0	0	0	0	0	0	0	0	0
KKVVSSK	388.253	0.05	60	5.1	10.3			0	0	0	1830	362	3970	2140	8230	4870	2260	0	0	3620	1900	0	4720	2320	0	0	0	0	0	0	0	0	0	0	0
SSRQLGLPGPPDVPDHAAYHPF	590.293	0.02	60	5	5.93			0	0	10200	0	0	26100	0	0	0	0	0	0	0	0	0	0	0	0	0	0	0	0	0	0	0	0	0	0
ELEN(+.98)EYAINKFINKDKRRRISAATNLSERQVTIWFQ(+.98)NRR	962.722	0.01	60	10.2	10.4		Deamidation (NQ)	0	0	0	0	0	0	69.1	0	0	0	21100	2060	13100	0	0	0	0	0	0	0	0	0	0	0	0	0	0	0
SETESRGSESGIFTNTKESSSHHPGIAEFPS	823.879	0.02	60	3.2	4.97	sp|P02671|FIBA_HUMAN		0	0	5110	0	2930	8810	0	6960	2770	0	0	0	1020	5640	0	3120	0	0	0	0	0	0	0	0	0	0	0	0
SSGGGSGGGYGN(+.98)Q(+.98)DQS	708.751	0.15	60	5.8	3.8		Deamidation (NQ)	5240	0	3190	1210	0	0	0	4970	3310	2620	1760	2470	2850	0	1060	5620	2130	0	0	0	0	0	0	0	0	0	0	0
LALNVVTVAT	500.814	0.12	60	7.4	5.52			1800	2770	0	3050	5560	3230	1430	2060	3440	1680	2070	2050	0	2620	2040	315	2410	0	0	0	0	0	0	0	0	0	0	0
KGAGQTNVPN(+.98)LVN(+.98)TMM(+15.99)ELRKCCNH	892.726	0.04	60	7.7	8.9		Deamidation (NQ); Oxidation (M)	24700	0	3600	0	0	0	0	0	0	0	2780	0	3970	0	1640	0	0	0	0	0	0	0	0	0	0	0	0	0
A(+42.01)AREELYSKVTPR	521.285	0.05	60	6.9	8.63		Acetylation (Protein N-term)	0	2800	2340	0	2740	2750	0	980	2780	2400	0	7200	3580	0	2320	3080	3790	0	0	0	0	0	0	0	0	0	0	0
KLHKVIEPK	546.344	0.07	60	5.9	9.7			6520	6670	0	0	0	7070	0	0	5630	0	0	0	0	0	4760	0	6120	0	0	0	0	0	0	0	0	0	0	0
LAALKKALAAAG	549.362	0.03	60	6.2	10			2620	7600	0	1120	0	2890	0	6800	4600	2470	4360	0	1500	0	3100	0	0	0	0	0	0	0	0	0	0	0	0	0
FGALLGLSLYGA	591.33	0.22	60	4.7	5.52			4220	4450	2930	0	2610	3520	0	2640	0	2250	4570	3600	0	884	0	2300	3250	0	0	0	0	0	0	0	0	0	0	0
KGKGKPLQRKVKPPKKQEEKEKKGKG	986.923	0.14	60	6.9	10.42			4990	0	0	0	3030	10200	0	3530	2100	2180	2060	3730	3940	0	1610	0	0	0	0	0	0	0	0	0	0	0	0	0
VCCCQ(+.98)QCC	890.23	0.01	60	3	5.47		Deamidation (NQ)	0	0	0	0	0	0	0	0	0	0	0	0	0	0	0	37400	0	0	0	0	0	0	0	0	0	0	0	0
TCVEGTIPK	474.251	0.01	60	9.1	5.66			0	0	0	0	14600	2810	0	2900	0	0	0	7500	0	0	8480	0	1160	0	0	0	0	0	0	0	0	0	0	0
KKVAKSPAK	478.814	0.05	60	6.4	10.48			0	0	5520	4840	0	18100	4860	0	0	0	0	271	3900	0	0	0	0	0	0	0	0	0	0	0	0	0	0	0
Q(-17.03)EGSGGDYM(+15.99)PMN(+.98)NWGS	865.298	0.15	60	8	3.67		Pyro-glu from Q; Oxidation (M); Deamidation (NQ)	5640	0	0	7580	0	0	8580	0	0	0	4960	0	3900	0	7050	0	0	0	0	0	0	0	0	0	0	0	0	0
YGNQ(+.98)DQSGGGGSGGY	702.741	0.03	60	7.5	3.8		Deamidation (NQ)	11200	0	0	0	0	0	6930	0	0	2110	5520	0	3810	2940	5690	0	0	0	0	0	0	0	0	0	0	0	0	0
Q(-17.03)LGLPGPPDVPDHAAYHPFR	723.026	0.01	60	5.1	5.98		Pyro-glu from Q	19200	7500	0	0	0	0	0	11500	0	0	0	0	0	0	0	0	0	0	0	0	0	0	0	0	0	0	0	0
TRDPLLARAELALLSIVFVAVALSN(+.98)GLVLAALAR	1173.38	0.04	60	8.8	9.17		Deamidation (NQ)	1870	649	3380	6510	0	0	7300	0	6420	0	0	2650	1900	570	2230	0	5320	0	0	0	0	0	0	0	0	0	0	0
Q(-17.03)PPTVVPGGDLAKVQ	744.906	0.02	60	6.3	5.84	sp|P68366|TBA4A_HUMAN	Pyro-glu from Q	0	0	0	0	0	0	0	0	6480	0	0	0	4210	6630	0	0	21600	0	0	0	0	0	0	0	0	0	0	0
SCWN(+.98)CGRKASETC	723.277	0.21	60	6.9	7.7		Deamidation (NQ)	12700	885	0	7400	0	0	6120	0	0	0	0	4190	0	0	5300	2660	0	0	0	0	0	0	0	0	0	0	0	0
HSLLLPAEVPVQRLLLSAFSAQGLVPGGGV	1009.27	0.06	60	7.5	6.75			5100	1470	0	0	0	0	3740	3230	5040	1350	1130	3490	5270	1030	4860	3730	0	0	0	0	0	0	0	0	0	0	0	0
LYIILI	374.255	0.14	60	5.2	5.52			2340	4430	0	0	2230	6050	8210	3600	0	2320	4640	0	1240	0	2270	0	2260	0	0	0	0	0	0	0	0	0	0	0
IPLDLLLAVPVP	630.395	0.07	60	4	3.8			5670	0	5230	0	0	0	0	0	3290	3160	5280	0	3920	0	4490	5160	3520	0	0	0	0	0	0	0	0	0	0	0
LANTQPRGPPASSPAPAPKFSPVTPKFTPVAS	804.681	0.13	60	6.2	11.17	sp|Q15942|ZYX_HUMAN		0	0	5390	0	0	0	0	8220	6250	4890	0	0	0	0	0	0	15000	0	0	0	0	0	0	0	0	0	0	0
TYAPVISAEKAYHEQL	607.311	0.05	60	7	5.37	sp|P68366|TBA4A_HUMAN		5760	3350	0	0	0	0	0	0	0	3390	4180	0	2550	11100	2350	0	7240	0	0	0	0	0	0	0	0	0	0	0
KLGLYRK	439.286	0.13	60	4.2	10.29			2070	6050	865	0	697	665	5170	6490	611	480	5520	535	497	6590	3390	0	386	0	0	0	0	0	0	0	0	0	0	0
RPPQAPKK	461.302	0.12	60	7.8	11.17			5320	247	3660	3120	0	978	4730	6320	5600	2060	0	1400	0	4070	2740	0	0	0	0	0	0	0	0	0	0	0	0	0
RHGIRRKLIK	638.91	0.2	60	7.2	12.31			2240	8260	2290	0	1750	4140	1330	0	4160	0	2970	1750	2690	0	2270	4050	2720	0	0	0	0	0	0	0	0	0	0	0
EDKTERELLESYIDG	599.624	0.05	60	4.8	4.08			0	0	13400	0	0	0	0	22600	4710	0	0	0	0	0	0	0	0	0	0	0	0	0	0	0	0	0	0	0
STQ(+.98)EIEACLQDFDN(+.98)M(+15.99)TWEIECT	656.748	0.01	60	6.7	3.34		Deamidation (NQ); Oxidation (M)	8360	0	0	0	0	0	0	0	0	0	0	31800	739	0	0	0	0	0	0	0	0	0	0	0	0	0	0	0
GHAMADTYAVVQ(+.98)KRGAPAGAGSGTQ(+.98)	601.538	0.02	60	3.1	8.6		Deamidation (NQ)	0	0	6200	0	0	0	0	23000	11700	0	0	0	0	0	0	0	0	0	0	0	0	0	0	0	0	0	0	0
GGRRAVPPNNSNAAEDDLPTVELQGVVPR	757.893	0.03	60	5.5	4.78			0	0	28000	0	0	0	0	0	13000	0	0	0	0	0	0	0	0	0	0	0	0	0	0	0	0	0	0	0
LPGIIKGV	796.522	0.35	60	5.7	8.75			0	0	1260	0	4960	6930	1690	2900	1700	1810	2290	2740	2790	2030	0	5800	4280	0	0	0	0	0	0	0	0	0	0	0
NGDTGECTDNAY	420.491	0.06	60	1.3	3.49			27700	0	0	7860	0	0	0	0	0	0	0	0	0	0	5650	0	0	0	0	0	0	0	0	0	0	0	0	0
Q(-17.03)FTSSTSYNRGDSTFES	948.895	0.12	60	7.8	4.37	sp|P02671|FIBA_HUMAN	Pyro-glu from Q	0	1860	4130	0	0	0	0	8960	7980	1240	2550	0	3780	3190	0	7530	0	0	0	0	0	0	0	0	0	0	0	0
LGRIGLPGGK	484.315	0.05	60	7.8	11			0	0	5460	0	0	0	0	0	0	1020	0	0	0	0	0	6700	28100	0	0	0	0	0	0	0	0	0	0	0
YGDPTN(+.98)GGQCT	557.203	0.01	60	6.8	3.8		Deamidation (NQ)	0	0	0	0	23900	17400	0	0	0	0	0	0	0	0	0	0	0	0	0	0	0	0	0	0	0	0	0	0
RARELRGLSLLVQ(+.98)Q(+.98)VLG	637.384	0.01	60	7.3	11.7		Deamidation (NQ)	0	0	0	0	0	0	0	0	38200	0	3260	0	0	0	0	0	0	0	0	0	0	0	0	0	0	0	0	0
A(+42.01)EAGALAQ(+.98)GGGPSA	600.289	0.04	60	7.1	4		Acetylation (Protein N-term); Deamidation (NQ)	19400	0	0	0	0	0	7100	0	252	0	0	1830	0	0	10700	0	2240	0	0	0	0	0	0	0	0	0	0	0
QQ(+.98)QQQ(+.98)PQQQPPQPQTQQQQ(+.98)QP	843.739	0.09	60	5.6	5.52		Deamidation (NQ)	0	0	287	1930	0	13100	0	0	14600	0	7120	0	4790	0	0	0	0	0	0	0	0	0	0	0	0	0	0	0
PKIKAKKQGF	572.872	0.09	60	8.9	10.48			4970	0	0	0	0	0	0	0	0	5660	0	8390	5240	0	4020	7220	6470	0	0	0	0	0	0	0	0	0	0	0
GYMCECLPGYN(+.98)GDNCEDDVDECASQPCQ(+.98)H	1066.35	0.13	60	7.8	3.62		Deamidation (NQ)	1890	0	0	9830	0	0	0	0	0	0	16600	0	8010	5710	0	0	0	0	0	0	0	0	0	0	0	0	0	0
Q(-17.03)EKPSSPSPMPSSTPSPSLNLG	736.684	0.02	60	9.2	6		Pyro-glu from Q	0	0	4650	0	6480	0	0	5530	339	0	6290	9020	0	0	0	0	9840	0	0	0	0	0	0	0	0	0	0	0
FGVILAPAK	458.291	0.03	60	10.2	8.75			4970	0	5770	0	8560	0	0	0	0	4260	0	7270	0	0	5440	0	5880	0	0	0	0	0	0	0	0	0	0	0
EAAGAGAGPG	757.339	0.33	60	3.8	4			0	0	0	0	0	0	5480	0	9480	0	6970	0	4780	9860	0	5610	0	0	0	0	0	0	0	0	0	0	0	0
KFSPGAPGGSGSQPNQKLGHPEALSAGTGSPQPPSFT	894.692	0.09	60	7.4	8.6	sp|Q15942|ZYX_HUMAN		0	0	10300	0	0	12400	0	4720	5090	0	0	0	2420	3000	0	4450	0	0	0	0	0	0	0	0	0	0	0	0
QTGLTTLAQ(+.98)AVQAG	453.902	0.28	60	2.4	5.52		Deamidation (NQ)	13600	1310	0	11100	0	0	10500	0	0	2150	0	0	0	0	3780	0	0	0	0	0	0	0	0	0	0	0	0	0
HVNSAHPGSSFLKKTSKKLAALLQ(+.98)GK	916.855	0.07	60	6	10.6		Deamidation (NQ)	0	2970	11200	0	0	6300	0	3040	6570	0	0	9300	0	3140	0	0	0	0	0	0	0	0	0	0	0	0	0	0
FTSSTSYNRGDSTFES	893.381	0.07	60	7.1	4.37	sp|P02671|FIBA_HUMAN		3960	2580	0	2780	4980	7210	0	0	0	0	1620	1550	1760	0	0	9170	7140	0	0	0	0	0	0	0	0	0	0	0
SAGKLVLIDKLLPKM(+15.99)KAGGHKVLIF	898.214	0.04	60	6.6	10.18		Oxidation (M)	0	0	26900	0	0	0	0	0	14200	1740	0	0	0	0	0	0	0	0	0	0	0	0	0	0	0	0	0	0
SSSYSKQFTSSTSYNRGDSTFESKSYKM	638.892	0.03	60	10.9	9.3	sp|P02671|FIBA_HUMAN		18500	5420	0	2250	0	0	0	0	0	12600	0	4300	0	0	0	0	0	0	0	0	0	0	0	0	0	0	0	0
FEKKSLEDKTERELLESYIDG	633.076	0.02	60	0	4.49			0	0	0	0	0	0	0	43100	0	0	0	0	0	0	0	0	0	0	0	0	0	0	0	0	0	0	0	0
AMKDEEKMEIQEMQLKEA	546.01	0.02	60	1.7	4.42			0	0	0	0	0	13400	0	21500	836	0	0	0	0	5080	0	0	2340	0	0	0	0	0	0	0	0	0	0	0
RGPVSGTEPEPVYSMEAADYREAS	866.727	0.04	60	8.7	4.25			0	0	6020	0	0	0	0	5410	3360	2510	4620	6210	4440	4660	2450	3850	0	0	0	0	0	0	0	0	0	0	0	0
HIKILTR	440.794	0.02	60	6.1	11			5560	15200	5460	0	0	0	0	0	4900	0	0	0	5180	4060	3330	0	0	0	0	0	0	0	0	0	0	0	0	0
SSSYGEQNSDSHQ(+.98)SSGRGQ(+.98)CGSGSGQSPNY	608.23	0.06	60	6.6	5.3		Deamidation (NQ)	25400	0	0	0	0	0	10100	0	1190	0	784	0	6260	0	0	0	0	0	0	0	0	0	0	0	0	0	0	0
ELLESYIDGR	597.802	0.07	60	3.8	4.14			4580	2930	8640	0	0	0	0	10100	0	1830	2690	3830	0	0	9170	0	0	0	0	0	0	0	0	0	0	0	0	0
KRKKN(+.98)APP	470.289	0.12	60	6.5	11.26		Deamidation (NQ)	2610	0	2820	2740	3900	7590	0	0	0	1790	2730	3680	2250	3190	1810	4250	4500	0	0	0	0	0	0	0	0	0	0	0
ESVIQ(+.98)EEIAEEVETSICECQ(+.98)DEN(+.98)HKT	749.58	0.03	60	7	3.93		Deamidation (NQ)	4030	1000	1780	0	0	7380	0	28400	0	1270	0	0	0	0	0	0	0	0	0	0	0	0	0	0	0	0	0	0
AGQSTEEEM(+15.99)YN(+.98)NET	540.534	0.02	60	0	3.58		Oxidation (M); Deamidation (NQ)	0	0	0	43900	0	0	0	0	0	0	0	0	0	0	0	0	0	0	0	0	0	0	0	0	0	0	0	0
Q(-17.03)VANPNSAIFGGARPREEVVQKEQE	912.792	0.19	60	8.4	4.95		Pyro-glu from Q	0	0	5930	0	0	3260	0	4900	4240	2840	1220	6380	2040	3030	0	4000	6100	0	0	0	0	0	0	0	0	0	0	0
HLSQDTGSPSGMRPWEDLPSQDTGSPS	957.093	0.14	60	2.9	4.22			3580	4710	0	0	0	0	1380	3480	12000	1420	1960	0	584	6590	0	8480	0	0	0	0	0	0	0	0	0	0	0	0
ACQNGGTCHN(+.98)T	553.701	0.02	60	4	6.76		Deamidation (NQ)	30900	0	0	13300	0	0	0	0	0	0	0	0	0	0	0	0	0	0	0	0	0	0	0	0	0	0	0	0
ASSPAPAPKFSPVTPKFTPVAS	728.728	0.01	60	4.3	10	sp|Q15942|ZYX_HUMAN		0	0	18900	0	0	16800	0	4150	0	0	3010	1380	0	0	0	0	0	0	0	0	0	0	0	0	0	0	0	0
GITYKPGDNYPVQFIPSTM(+15.99)AAAAASGLSPLQ(+.98)LQKGHVS	983.737	0.06	60	5.4	8.44		Oxidation (M); Deamidation (NQ)	0	7040	0	9340	0	0	0	0	0	0	672	0	11700	0	15800	0	0	0	0	0	0	0	0	0	0	0	0	0
EEHGIDLAGSDRGASALQ	609.292	0.06	60	4.9	4.31			0	0	0	1760	0	0	0	0	0	2600	2290	12100	2810	5070	2870	0	15300	0	0	0	0	0	0	0	0	0	0	0
NPGGDFGKKELSP	673.34	0.16	60	5.5	6.07			6210	0	0	8080	0	0	10500	0	0	3630	2320	0	0	0	2720	0	11400	0	0	0	0	0	0	0	0	0	0	0
DLALKFGYPTPHGGCQ(+.98)KMDTTFTEGAVPGQ	1056.47	0.1	60	6.6	5.38		Deamidation (NQ)	8890	0	0	4330	0	0	0	0	4670	0	0	0	0	5880	0	0	21100	0	0	0	0	0	0	0	0	0	0	0
LEDKTERELLESYIDGR	689.354	0.03	60	4.9	4.36			7610	0	0	0	0	0	0	21000	10800	0	5810	0	0	0	0	0	0	0	0	0	0	0	0	0	0	0	0	0
SEPGEAKKMEDKEKDNKLISAN(+.98)SSEGQDQLQ	859.41	0.04	60	5.9	4.55		Deamidation (NQ)	0	0	3040	0	0	9230	0	0	4950	3080	1510	3060	0	4670	0	0	15900	0	0	0	0	0	0	0	0	0	0	0
KVMLK	618.401	0.09	60	6.5	10			0	0	0	9060	5090	7840	0	0	0	2570	3220	2770	0	3810	0	0	11100	0	0	0	0	0	0	0	0	0	0	0
TSSLTQ(+.98)PIEM(+15.99)PTLSSSPTEERPT	836.073	0.03	60	7.1	4.25		Deamidation (NQ); Oxidation (M)	920	2280	0	0	0	2200	0	31600	0	0	6400	907	0	1200	0	0	0	0	0	0	0	0	0	0	0	0	0	0
AVPPNNSNAAEDDLPTVE	926.933	0.03	60	4.8	3.43			0	0	6930	0	0	33500	0	5330	0	0	0	0	0	0	0	0	0	0	0	0	0	0	0	0	0	0	0	0
HDSEQ(+.98)DNSDNN(+.98)T	689.228	0.03	60	5.7	3.84		Deamidation (NQ)	0	0	0	0	0	0	0	0	0	0	0	0	0	9030	0	19600	17200	0	0	0	0	0	0	0	0	0	0	0
SSTSYNRGDSTFESKSYKMADEAGSEADHEGTHST	754.719	0.13	60	5.5	4.69	sp|P02671|FIBA_HUMAN		0	1400	6130	0	5450	13300	0	5660	3380	0	0	0	0	5250	0	5330	0	0	0	0	0	0	0	0	0	0	0	0
QPNQ(+.98)N(+.98)LWAQ(+.98)GCHE	764.309	0.12	60	9.3	5.24		Deamidation (NQ)	1310	0	9900	4230	0	0	0	0	0	3310	0	6470	12100	3550	0	5270	0	0	0	0	0	0	0	0	0	0	0	0
TQ(+.98)WGRILSSYVLKTVLLAVLLRKG	905.881	0.15	60	6	11.1		Deamidation (NQ)	14900	2910	5120	0	0	734	7350	3840	0	1240	0	5110	0	0	1860	3230	0	0	0	0	0	0	0	0	0	0	0	0
VQPQPQPKPQVQLHVQSQT	723.057	0.21	60	5.8	8.73	sp|Q15942|ZYX_HUMAN		0	0	4740	0	2800	3140	0	3090	2680	2800	2040	8270	1720	3790	2560	2580	6680	0	0	0	0	0	0	0	0	0	0	0
EENM(+15.99)TIAMEEAPE	503.876	0.05	60	3.5	3.51		Oxidation (M)	0	10700	0	0	0	0	15900	0	0	0	7670	12800	0	0	0	0	0	0	0	0	0	0	0	0	0	0	0	0
AIKADAEGESDLENSRKLLS	537.279	0.06	60	4.8	4.51			0	0	5800	0	4860	5170	0	1240	1610	1530	2830	0	0	800	0	3140	20300	0	0	0	0	0	0	0	0	0	0	0
SSSYSKQ(+.98)FTSSTSYNRGDSTFESKSYKMADEAGSEADHEGTHST	958.011	0.05	60	2.7	5.01	sp|P02671|FIBA_HUMAN	Deamidation (NQ)	0	0	0	4160	0	3480	0	7910	15700	0	0	0	0	0	0	16100	0	0	0	0	0	0	0	0	0	0	0	0
GRGASFPPSLGVLVSLQLLLLLGLPPRPQ(+.98)	749.954	0.07	60	3.7	12		Deamidation (NQ)	0	0	9520	9350	0	4000	1590	0	8350	0	0	0	924	9850	79.5	0	3830	0	0	0	0	0	0	0	0	0	0	0
VYQ(+.98)SKPATLPRAKKMKGPIKDLIKAKGKEL	1113.34	0.08	60	4.8	10.3		Deamidation (NQ)	20100	0	0	8840	0	0	7320	0	0	1220	0	0	0	0	10200	0	0	0	0	0	0	0	0	0	0	0	0	0
KKKMKSKKK	567.38	0.1	60	8.5	10.78			3560	0	1980	0	4120	1320	0	7360	0	2850	0	4310	6740	4670	4080	0	6800	0	0	0	0	0	0	0	0	0	0	0
Q(-17.03)VYSDYESNPQ	656.758	0.07	60	5	3.67		Pyro-glu from Q	20000	2440	0	0	0	0	6730	0	0	0	0	8830	0	0	9800	0	0	0	0	0	0	0	0	0	0	0	0	0
AAQ(+.98)N(+.98)FFCAGCGTP	644.746	0.09	60	7.4	5.55		Deamidation (NQ)	21600	0	0	7190	0	0	3130	0	0	0	0	0	4110	0	12300	0	0	0	0	0	0	0	0	0	0	0	0	0
E(-18.01)ALEILSAITQPVVVVAIVGLYRTGK	907.874	0.05	60	8.7	6.24		Pyro-glu from E	14500	215	14800	0	1840	0	6120	1250	0	0	0	4250	463	0	0	5070	0	0	0	0	0	0	0	0	0	0	0	0
GGYGGG	467.186	0.11	60	4.1	5.52			0	0	3030	0	0	0	0	0	0	0	5630	22700	3780	5090	0	0	8310	0	0	0	0	0	0	0	0	0	0	0
G(+42.01)SGSGGGGSGGGGGGGSS	413.165	0.12	60	6.1	5.52		Acetylation (Protein N-term)	12500	7220	0	10400	0	0	8360	0	0	0	2650	6500	1590	0	0	0	0	0	0	0	0	0	0	0	0	0	0	0
NIKGAI	615.39	0.03	60	6.5	8.75			10200	0	12200	3520	13300	0	0	0	0	0	0	0	0	0	10000	0	0	0	0	0	0	0	0	0	0	0	0	0
AIPAILIGAIGAS	583.86	0.12	60	5.6	5.57			7400	5470	6870	6160	2660	3160	0	0	0	2230	7210	0	2380	1170	0	2290	2230	0	0	0	0	0	0	0	0	0	0	0
VNPFRPGDSEPPPAPGAQ	611.635	0.09	60	5.6	4.37	sp|Q15942|ZYX_HUMAN		0	0	10200	0	10600	14200	0	0	0	0	0	0	0	3210	0	1200	9860	0	0	0	0	0	0	0	0	0	0	0
NDN(+.98)EEGFFSA	565.717	0.15	60	8.3	3.57	sp|P02675|FIBB_HUMAN	Deamidation (NQ)	11200	1600	0	4880	0	0	7950	0	0	7790	0	8260	1280	4940	1520	0	0	0	0	0	0	0	0	0	0	0	0	0
KN(+.98)EFPVILSIENHCSIQQQ(+.98)RKIA	540.279	0.04	60	4.7	8.21		Deamidation (NQ)	0	0	11900	0	12100	11400	0	0	0	0	0	0	0	0	0	0	14500	0	0	0	0	0	0	0	0	0	0	0
KGSSPCDSLL	503.75	0.34	60	4.7	5.83			9360	1800	2800	973	2460	8690	1030	1430	0	1080	1080	3430	3260	437	2640	7880	1610	0	0	0	0	0	0	0	0	0	0	0
DDDGDDDDDFFSA	724.74	0.01	60	6.1	3.07			0	0	0	0	0	0	138	0	0	14800	0	35100	0	0	0	0	0	0	0	0	0	0	0	0	0	0	0	0
SYNRGDSTFESKSYKMADEAGSEADHEGTHSTKRGHA	809.557	0.02	60	5.1	5.79	sp|P02671|FIBA_HUMAN		0	0	8130	0	1670	17900	0	2730	2470	1390	1780	0	2460	11700	0	0	0	0	0	0	0	0	0	0	0	0	0	0
VVPSPKVSDTVVEPYN	865.452	0.14	60	5.4	4.37			0	0	0	0	12000	0	0	2050	2580	0	0	4440	1550	1440	0	5500	20700	0	0	0	0	0	0	0	0	0	0	0
SDMRQEKPSSPSPMPSSTPSPSLNLG	905.428	0.05	60	11.5	5.79			0	0	6640	0	0	6580	0	3720	4580	0	0	8730	3640	3630	0	4770	7980	0	0	0	0	0	0	0	0	0	0	0
NNSNAAEDDLPTVELQGVVPR	1119.55	0.06	60	2.9	3.92			0	0	9960	0	3760	29500	0	0	7280	0	0	0	0	0	0	0	0	0	0	0	0	0	0	0	0	0	0	0
KATPT	517.285	0.06	60	1.7	8.75			0	12600	0	0	0	38300	0	0	0	0	0	0	0	0	0	0	0	0	0	0	0	0	0	0	0	0	0	0
STRSAGEAPSEN(+.98)Q(+.98)SPSKGPEEASSEVQDT	988.758	0.19	60	7.1	4.14		Deamidation (NQ)	28700	4840	0	0	0	0	4340	0	1940	1670	0	2800	557	1890	3360	822	0	0	0	0	0	0	0	0	0	0	0	0
DLVPGNF	761.382	0.1	60	8.3	3.8	sp|P02671|FIBA_HUMAN		9020	3410	0	0	0	0	0	0	0	0	0	0	0	7680	0	9750	21200	0	0	0	0	0	0	0	0	0	0	0
TLKEVEELE	545.281	0.02	60	6.6	4.09	sp|Q15942|ZYX_HUMAN		0	0	12300	0	19600	13600	0	0	0	0	0	0	0	0	0	5570	0	0	0	0	0	0	0	0	0	0	0	0
GVRVGALLLLGVL	640.428	0.22	60	7.2	9.75			2860	5100	0	0	0	3820	4080	702	4410	2880	4190	3360	2420	3280	3430	4850	6720	0	0	0	0	0	0	0	0	0	0	0
QPPTVVPGGDLAKVQ	753.42	0.06	60	2.9	5.84	sp|P68366|TBA4A_HUMAN		0	0	1550	0	0	0	0	0	0	0	0	0	0	10500	0	0	40200	0	0	0	0	0	0	0	0	0	0	0
EALLFSGQ(+.98)FTD	614.779	0.03	60	6.8	3.67		Deamidation (NQ)	21700	0	0	23700	2940	0	0	0	0	0	0	0	0	1890	0	0	2120	0	0	0	0	0	0	0	0	0	0	0
Q(-17.03)GVN(+.98)DNEEGFFSA	699.28	0.01	60	4.8	3.57	sp|P02675|FIBB_HUMAN	Pyro-glu from Q; Deamidation (NQ)	0	0	8940	0	13300	5870	1550	788	4080	0	0	0	0	0	0	17600	437	0	0	0	0	0	0	0	0	0	0	0
LLTLVLSLLPPQ	653.929	0.15	60	4.7	5.52			5860	11900	0	0	0	4260	2700	5080	6010	0	0	0	2880	2730	4220	0	7280	0	0	0	0	0	0	0	0	0	0	0
Q(+.98)DTLDALFN(+.98)IMMEN(+.98)	829.331	0.03	60	9.6	3.49		Deamidation (NQ)	25600	0	0	0	0	0	7320	0	0	0	0	12300	0	0	7860	0	0	0	0	0	0	0	0	0	0	0	0	0
E(-18.01)KINQIILLKDIIYKVKTV	1127.19	0.05	60	7.5	9.41		Pyro-glu from E	0	1560	387	5760	257	0	0	7460	9070	336	13700	6150	0	0	953	4130	3570	0	0	0	0	0	0	0	0	0	0	0
PRLGTPQ(+.98)RSGAA	606.337	0.11	60	5.3	12		Deamidation (NQ)	3820	7460	0	4250	2970	6100	4340	1560	4850	0	0	6220	0	0	4280	0	7530	0	0	0	0	0	0	0	0	0	0	0
SRQLGLPGPPDVPDHA	552.62	0.01	60	3.7	5.19			0	0	9160	0	5180	35400	0	3720	0	0	0	0	0	0	0	0	0	0	0	0	0	0	0	0	0	0	0	0
SETESRGSESGIFTNTKESSSHHPGIAEFPSRGK	727.548	0.09	60	2.8	6.01	sp|P02671|FIBA_HUMAN		3510	0	6000	2380	0	6900	0	3060	1850	1350	0	0	3820	15800	0	8940	0	0	0	0	0	0	0	0	0	0	0	0
GTPDGPRCECMPGYAGDNCSENQ(+.98)DDCRDH	786.544	0.08	60	8.2	4.09		Deamidation (NQ)	0	5450	0	0	0	0	8840	21800	0	0	0	0	11100	0	0	6540	0	0	0	0	0	0	0	0	0	0	0	0
GDSEN(+.98)AN(+.98)LAGTFCGST	773.311	0.26	60	5.4	3.67	sp|O60494|CUBN_HUMAN	Deamidation (NQ)	6440	0	6850	0	0	0	0	1100	6650	2160	3090	3990	7560	1970	0	8440	5550	0	0	0	0	0	0	0	0	0	0	0
SSSYSKQFTSSTSYN(+.98)RGDSTFESKSYKMA	816.364	0.05	60	9.6	9.3	sp|P02671|FIBA_HUMAN	Deamidation (NQ)	5710	2490	0	12700	0	0	14200	0	0	7800	3850	0	3260	3820	0	0	0	0	0	0	0	0	0	0	0	0	0	0
PEEPN(+.98)KTCESSNTSATT	898.879	0.02	60	3.6	4.25		Deamidation (NQ)	0	0	8990	0	0	0	0	31500	0	0	0	0	1580	0	12400	0	0	0	0	0	0	0	0	0	0	0	0	0
SRPGGRASVDTKEAEGAPQVEAGKRLEEL	760.145	0.09	60	2.3	5.1			0	4670	6170	0	4760	4210	0	0	1770	4180	2580	12400	0	3600	2490	0	8140	0	0	0	0	0	0	0	0	0	0	0
EQVTNVGGAVVTGVT	715.875	0.11	60	5.3	4			0	0	7490	0	0	0	0	8270	6100	2720	2000	3630	1610	4680	2250	7040	9400	0	0	0	0	0	0	0	0	0	0	0
SLDRNLPSDSQDLGQHGLEEDF	824.713	0.22	60	3.9	3.96			8840	13200	3160	0	0	0	0	12300	5300	0	3790	0	0	4020	4650	0	0	0	0	0	0	0	0	0	0	0	0	0
DNEEGFF	857.329	0.29	60	3.4	3.57	sp|P02675|FIBB_HUMAN		3370	0	0	0	0	0	0	0	0	0	0	0	0	17600	0	14700	20200	0	0	0	0	0	0	0	0	0	0	0
SKAATDAQDAN(+.98)QCC	476.177	0.06	60	2.2	4.21		Deamidation (NQ)	26600	0	0	0	0	0	18400	0	0	0	0	0	0	0	10900	0	0	0	0	0	0	0	0	0	0	0	0	0
EFVSETESRGSESGIFTNTKESSSHHPGIAEFPSRG	776.963	0.03	60	2.7	5.06	sp|P02671|FIBA_HUMAN		0	0	10000	0	13900	8970	0	7440	9060	0	0	0	0	3290	0	3270	0	0	0	0	0	0	0	0	0	0	0	0
E(-18.01)EAAGAGRAQ(+.98)GRG	606.782	0.08	60	6	6.24		Pyro-glu from E; Deamidation (NQ)	25300	0	0	0	0	0	2240	0	0	0	2190	4310	2500	0	17800	0	2070	0	0	0	0	0	0	0	0	0	0	0
E(-18.01)EDDDDEDGGGGDH	722.221	0.09	60	4.8	3.47		Pyro-glu from E	3110	0	16600	0	0	3880	0	22600	0	0	0	0	0	3050	0	7200	0	0	0	0	0	0	0	0	0	0	0	0
QNGAGEDN(+.98)QQENKPS	808.829	0.17	60	5.2	4.14		Deamidation (NQ)	8480	3910	0	1160	0	0	3800	0	0	4070	633	4530	5260	11700	1330	8380	3410	0	0	0	0	0	0	0	0	0	0	0
RGSCAEGM(+15.99)EGN(+.98)GTCSCQEGFGGTACET	665.486	0.15	60	7.3	4.09		Oxidation (M); Deamidation (NQ)	0	1940	0	7360	0	3890	4610	0	2540	2820	547	4060	3310	9030	970	8530	7250	0	0	0	0	0	0	0	0	0	0	0
KKKAAK	673.466	0.27	60	4.7	10.48			2210	9770	3170	0	2450	4790	0	8390	6430	0	6770	2980	2990	0	3650	3330	0	0	0	0	0	0	0	0	0	0	0	0
CHNAS	531.185	0.36	60	3.1	6.73			0	2600	3900	2430	1860	3690	3650	9100	6760	1920	4150	0	2960	6360	0	4040	3700	0	0	0	0	0	0	0	0	0	0	0
EEHGIDLAGSDRGASALQLE	690	0.12	60	4.8	4.17			3860	3020	0	0	0	0	0	4770	0	4830	5740	9370	5550	5570	3820	0	10700	0	0	0	0	0	0	0	0	0	0	0
FTSSTSYNRGDSTFESKSYKM	606.525	0.12	60	4.5	8.43	sp|P02671|FIBA_HUMAN		14400	5930	0	15300	0	0	1680	0	0	2660	0	5270	2040	7670	2690	0	0	0	0	0	0	0	0	0	0	0	0	0
AATVGSLAGQPLQERAQAWGERL	803.76	0.05	60	5.6	6.19			20500	14000	0	0	0	0	0	23400	0	0	0	0	0	0	0	0	0	0	0	0	0	0	0	0	0	0	0	0
HPPAMNHLDSSSNPSSTTSSTPSSPAPFPTSSN(+.98)PSSATTPPN(+.98)PSPGQRDS	1001.44	0.05	60	9	5.98		Deamidation (NQ)	0	0	6240	0	0	0	0	19400	0	984	0	11000	2060	0	0	18400	0	0	0	0	0	0	0	0	0	0	0	0
N(+.98)EQNRHTTQ(+.98)M(+15.99)SDEEEDDDGC	593.458	0.06	60	9	3.84		Deamidation (NQ); Oxidation (M)	367	324	1420	0	0	1100	34600	0	0	0	0	0	0	1270	793	18400	0	0	0	0	0	0	0	0	0	0	0	0
AVLEEDEEVTEEAEM(+15.99)EPEDKGH	844.356	0.05	60	5.5	3.8		Oxidation (M)	25400	0	0	0	0	0	663	2470	12800	2100	1970	3900	3750	2280	0	3190	0	0	0	0	0	0	0	0	0	0	0	0
DRSPAPTGRPTPGA	690.359	0.01	60	4.9	9.6			0	0	33100	0	19500	0	0	0	0	6050	0	0	0	0	0	0	0	0	0	0	0	0	0	0	0	0	0	0
EEAPSLRPAPPPISGGGY	897.953	0.04	60	4.7	4.53	sp|P02675|FIBB_HUMAN		0	0	0	0	27400	0	0	2810	13600	0	0	0	2360	4200	0	8400	0	0	0	0	0	0	0	0	0	0	0	0
ETEEEAM(+15.99)TVQADIIPSPTDTSCRQ	667.544	0.01	60	4.9	3.77		Oxidation (M)	38700	4580	0	0	0	0	0	0	15500	0	0	0	0	0	0	0	0	0	0	0	0	0	0	0	0	0	0	0
TVLKLLLNGA	521.331	0.09	60	5.5	8.41			6860	1880	25800	464	18600	2190	229	408	0	0	0	0	0	1970	508	0	0	0	0	0	0	0	0	0	0	0	0	0
NLAKGKEESLDSDLYA	584.962	0.05	60	11.1	4.32			0	0	9880	0	16000	13000	0	0	586	0	0	2890	0	3470	0	1090	12100	0	0	0	0	0	0	0	0	0	0	0
G(+42.01)DGAGA	489.195	0.17	60	7.8	3.8		Acetylation (Protein N-term)	0	2840	3520	0	2270	13600	0	13500	3580	0	0	0	0	0	0	19900	0	0	0	0	0	0	0	0	0	0	0	0
Q(-17.03)FTSSTSYNRGDSTFESKS	1056.46	0.07	60	4.9	6.07	sp|P02671|FIBA_HUMAN	Pyro-glu from Q	3930	0	9280	0	19000	4180	0	3050	3180	0	0	0	1590	4280	1800	4820	4140	0	0	0	0	0	0	0	0	0	0	0
DDPDAPLQPVTPLQLFEG	976.481	0.09	60	6.6	3.37			1460	1320	9060	0	6480	12500	0	10500	2580	741	0	0	2770	1180	0	11700	0	0	0	0	0	0	0	0	0	0	0	0
E(-18.01)STLQPVLSLIPREKKPPRPPKKKYQK	792.732	0.13	60	6.9	10.38		Pyro-glu from E	11800	0	8540	0	0	0	1390	0	0	0	1790	9780	0	0	1080	0	26000	0	0	0	0	0	0	0	0	0	0	0
N(+.98)PGGDFGKKELSP	673.831	0.07	60	3.8	6.07		Deamidation (NQ)	19400	5220	0	6030	0	0	14200	0	0	7270	3470	0	0	0	4930	0	0	0	0	0	0	0	0	0	0	0	0	0
KGDLELRPSTFLIIDPLLGLLKIQE	941.241	0.15	60	4.2	4.78			4790	0	6060	0	0	9520	2670	3730	0	1400	0	5900	5620	0	0	14100	6760	0	0	0	0	0	0	0	0	0	0	0
KLFAKGN	777.48	0.2	60	5	10			4540	0	9920	0	7540	0	3380	0	5860	4290	4840	4520	4510	1780	3460	5940	0	0	0	0	0	0	0	0	0	0	0	0
SKGSQ(+.98)GPKGS	933.476	0.05	60	3.6	10		Deamidation (NQ)	37600	0	0	0	0	0	0	0	0	0	0	0	0	0	23000	0	0	0	0	0	0	0	0	0	0	0	0	0
NHTCSN(+.98)ADETFCEM	801.774	0.03	60	6.2	4.13		Deamidation (NQ)	0	7870	0	21000	0	0	0	0	32200	0	0	0	0	0	0	0	0	0	0	0	0	0	0	0	0	0	0	0
A(+42.01)GGGASWELCAGALSAR	809.888	0.15	60	3.8	6.04		Acetylation (Protein N-term)	16600	0	0	17600	0	0	23300	0	0	0	3660	0	0	0	0	0	0	0	0	0	0	0	0	0	0	0	0	0
FTSSTSYNRGDSTFESKSY	721.985	0.21	60	6.4	6.07	sp|P02671|FIBA_HUMAN		8900	3280	2600	5730	5240	4960	1870	2740	1390	1700	0	3380	0	6740	838	7500	4780	0	0	0	0	0	0	0	0	0	0	0
SN(+.98)FAGLPAGEQDAEGN(+.98)DVIEEEDG	822.35	0.05	60	9	3.23		Deamidation (NQ)	33300	2560	0	18200	0	0	0	0	0	0	0	4560	0	0	3110	0	0	0	0	0	0	0	0	0	0	0	0	0
FVSETESRGSESGIFTN(+.98)TKESSSHHPGIAEFPSRG	938.943	0.02	60	5.2	5.45	sp|P02671|FIBA_HUMAN	Deamidation (NQ)	0	1100	14300	0	0	8320	0	29100	5660	0	0	2410	0	0	405	537	0	0	0	0	0	0	0	0	0	0	0	0
LGEDAEVAADFDM(+15.99)E	764.309	0.26	60	6.9	3.29		Oxidation (M)	3420	0	4870	4660	0	0	0	3690	8740	5870	4000	5350	5070	7840	0	4080	4410	0	0	0	0	0	0	0	0	0	0	0
QELVVKPIKVKRKKKKKKT	769.528	0.07	60	4.1	10.87			0	7870	8940	0	0	13500	0	10800	2830	3010	0	0	0	15100	0	0	0	0	0	0	0	0	0	0	0	0	0	0
GSGKTLAFVIPVVQALLSRVVCHIRALVVLPTKE	1205.39	0.05	60	7.6	10.05			12200	0	5730	3440	6970	0	3160	0	1870	2510	8070	4420	2730	460	8130	0	2870	0	0	0	0	0	0	0	0	0	0	0
VPPNNSNAAEDDLPTVELQGVVPR	844.431	0.01	60	9.9	3.92			10400	0	17100	4670	9090	0	0	6020	6800	0	0	0	0	0	4950	3940	0	0	0	0	0	0	0	0	0	0	0	0
CDDM(+15.99)MTCY	499.139	0.16	60	5.7	3.56	sp|P21817|RYR1_HUMAN	Oxidation (M)	0	0	10500	0	0	25900	1540	1790	4340	1900	0	0	2440	5400	2030	0	7310	0	0	0	0	0	0	0	0	0	0	0
VNPFRPGDSEPPPAPGAQRAQMGRVG	672.84	0.11	60	4.7	9.48	sp|Q15942|ZYX_HUMAN		0	0	5910	0	8720	2820	0	0	0	0	0	12700	0	9240	0	0	23900	0	0	0	0	0	0	0	0	0	0	0
DSKGADGGWQ(+.98)HC	421.169	0.01	60	9.4	5.21		Deamidation (NQ)	0	0	0	0	0	0	0	0	0	0	0	0	0	0	63400	0	0	0	0	0	0	0	0	0	0	0	0	0
A(+42.01)EGKAGGAAGLFAKQVQKKF	512.785	0.02	60	11.3	10		Acetylation (Protein N-term)	7540	0	0	0	0	0	0	0	3630	6400	0	17400	5370	3080	8070	0	12100	0	0	0	0	0	0	0	0	0	0	0
KTKPGV	629.404	0.29	60	4.3	10			3680	9430	2920	2050	11200	0	1500	3100	2630	1940	3400	2560	2020	2400	8310	4940	2020	0	0	0	0	0	0	0	0	0	0	0
Q(-17.03)EILESEEKGDPNKPSGFR	715.013	0.09	60	4.8	4.59	sp|O00151|PDLI1_HUMAN	Pyro-glu from Q	0	0	5870	0	6430	3370	0	3570	0	0	1040	6930	1090	5090	0	4520	26400	0	0	0	0	0	0	0	0	0	0	0
Q(+.98)EGSAQGHPPAGAGGGSSCRAEPVPGGQT	883.38	0.09	60	7	5.4		Deamidation (NQ)	0	0	0	3430	5410	16700	0	11600	0	0	0	0	3590	3100	0	20500	0	0	0	0	0	0	0	0	0	0	0	0
THRIHWESASLLR	402.221	0.26	60	3.5	9.32	sp|P01024|CO3_HUMAN		0	3180	3030	0	12000	0	5730	3300	0	4650	9430	4510	3460	0	3900	4510	7110	0	0	0	0	0	0	0	0	0	0	0
AMKDEEKMEIQEMQLKE	528.251	0.04	60	2.5	4.42			0	0	3930	0	0	5510	0	897	5170	3360	2380	13400	2200	9610	0	4050	14600	0	0	0	0	0	0	0	0	0	0	0
KKKVLNKDGK	579.373	0.09	60	8.4	10.18			0	45000	0	0	3850	0	0	0	0	0	0	1420	0	12500	2400	0	0	0	0	0	0	0	0	0	0	0	0	0
EYQTFFNPR	601.286	0.1	60	5.6	6.1			7410	3110	0	6270	0	0	3860	0	0	3820	0	6500	2860	14100	2170	0	15100	0	0	0	0	0	0	0	0	0	0	0
Q(-17.03)EILESEEKGDPNKPSGFRSV	777.048	0.06	60	11.2	4.59	sp|O00151|PDLI1_HUMAN	Pyro-glu from Q	0	0	6710	0	11300	0	0	721	3500	3520	2370	14700	0	7170	0	0	15300	0	0	0	0	0	0	0	0	0	0	0
TQPRGPPASSPAPAPKFSPVTPKFTPVAS	730.142	0.19	60	6.8	11.17	sp|Q15942|ZYX_HUMAN		0	0	10400	0	17000	0	0	7860	6010	0	1910	18500	3920	0	0	0	0	0	0	0	0	0	0	0	0	0	0	0
KMADEAGSEADHEGTHSTKRGHAKSRPV	598.691	0.29	60	2.3	7.03	sp|P02671|FIBA_HUMAN		5300	2190	13800	1270	11200	10100	807	9560	4000	822	0	0	682	2640	1260	1550	938	0	0	0	0	0	0	0	0	0	0	0
AISSSKKKELLKRQSHLQAGVSKLNEAKAL	816.499	0.02	60	5.6	10.3			1240	0	0	0	0	0	0	44200	0	0	0	10600	0	2840	0	7340	0	0	0	0	0	0	0	0	0	0	0	0
QGIQGQ(+.98)TETENTETVDSGM(+15.99)SNGM(+15.99)VCA	907.369	0.05	60	7	3.5		Deamidation (NQ); Oxidation (M)	16100	0	16500	8920	0	0	0	7610	1440	0	0	0	0	15900	0	0	0	0	0	0	0	0	0	0	0	0	0	0
TQTDKALFN(+.98)RLVPSVNGVRRFSDIQIRRLKRLGIEKTDPTT	948.938	0.04	60	7.8	11.36		Deamidation (NQ)	0	4660	0	9980	0	0	0	5590	0	7460	12800	0	7140	0	12100	6740	0	0	0	0	0	0	0	0	0	0	0	0
GGEGN(+.98)TGP	689.277	0.13	60	3.3	4		Deamidation (NQ)	0	0	0	0	0	0	0	24300	18100	0	5840	0	0	0	0	19000	0	0	0	0	0	0	0	0	0	0	0	0
LLLPKPP	389.262	0.2	60	5.5	8.75			0	7880	3860	2860	2210	2800	5160	2360	0	3010	9010	0	5350	1880	0	17100	4020	0	0	0	0	0	0	0	0	0	0	0
EEEGEEEEEEEGGGD	551.526	0.1	60	4.9	3.22			14700	2970	0	0	0	0	0	0	0	0	13500	8480	0	0	10800	17200	0	0	0	0	0	0	0	0	0	0	0	0
KVLLVRSFR	559.366	0.11	60	8	12.01			2880	179	4090	1060	0	0	0	10300	8120	6250	0	9530	6840	5910	6500	0	6030	0	0	0	0	0	0	0	0	0	0	0
NDWSDDDDDS	395.127	0.14	60	3	3.17			28000	15500	0	19600	0	0	5110	0	0	0	0	0	0	0	0	0	0	0	0	0	0	0	0	0	0	0	0	0
EGDFLAEGGGV	525.74	0.12	60	3.9	3.57	sp|P02671|FIBA_HUMAN		0	0	0	0	0	0	0	0	0	6740	0	21400	5850	24000	0	7200	3350	0	0	0	0	0	0	0	0	0	0	0
SSSYSKQFTSSTSYN(+.98)RGDSTFESKSYKM(+15.99)ADEAGSEADHEGTHSTKRGHA	1071.07	0.2	60	5.7	6.23	sp|P02671|FIBA_HUMAN	Deamidation (NQ); Oxidation (M)	13000	5750	13000	9220	0	0	0	0	2640	0	2320	0	7580	11000	0	4080	0	0	0	0	0	0	0	0	0	0	0	0
GFAGLLAILLV	543.851	0.11	60	8.7	5.52			5020	3090	5720	3450	7270	11000	0	0	3040	3930	0	5030	7330	3460	4830	0	6140	0	0	0	0	0	0	0	0	0	0	0
Q(-17.03)EILESEEKGDPNKPSGF	993.963	0.09	60	3.9	4.25	sp|O00151|PDLI1_HUMAN	Pyro-glu from Q	0	0	12600	0	6650	16800	0	13700	6960	0	0	0	1530	0	0	6530	4700	0	0	0	0	0	0	0	0	0	0	0
QLGLPGPPDVPDHAA	742.38	0.01	60	1.8	4.2			0	0	17000	0	0	29200	0	16300	9170	0	0	0	0	0	0	0	0	0	0	0	0	0	0	0	0	0	0	0
VNDNEEGFFSA	614.759	0.31	60	4.3	3.57	sp|P02675|FIBB_HUMAN		19200	8310	0	13200	0	0	4960	0	0	4020	0	4690	4260	6560	5220	1670	0	0	0	0	0	0	0	0	0	0	0	0
RLGHLKK	851.551	0.38	60	4.6	11.17			2530	3950	5390	3620	5580	8840	5210	4930	2630	0	4800	4730	3910	4140	0	5850	6080	0	0	0	0	0	0	0	0	0	0	0
A(+42.01)LLSGAQARG	985.537	0.14	60	3.1	9.79		Acetylation (Protein N-term)	0	21000	11800	35400	0	0	0	4340	0	0	0	0	0	0	0	0	0	0	0	0	0	0	0	0	0	0	0	0
YNRGDSTFESKSYKMADEAGSEADHEGTHSTKRGHA	792.154	0.03	60	3	5.81	sp|P02671|FIBA_HUMAN		6130	2410	8830	0	12900	20900	0	5290	6000	1560	0	0	1480	7050	0	0	0	0	0	0	0	0	0	0	0	0	0	0
SNSGM(+15.99)DSN(+.98)IDLTI	692.304	0.06	60	7.1	3.56		Oxidation (M); Deamidation (NQ)	28900	0	0	0	0	0	7140	0	0	1440	1280	8500	0	0	25300	0	0	0	0	0	0	0	0	0	0	0	0	0
SSPTAAGTPNKETAGLKVGVS	658.015	0.24	60	4.7	8.31			0	2080	9820	0	0	6500	1590	4700	3900	5510	5140	15400	0	3910	5840	8390	0	0	0	0	0	0	0	0	0	0	0	0
FEKKSLEDKTERELLESY	561.79	0.08	60	7.2	4.72			0	0	17400	0	11800	6390	0	18800	7860	0	3150	0	0	3680	0	0	3820	0	0	0	0	0	0	0	0	0	0	0
TN(+.98)VLGMM(+15.99)TAILGVFLYNKTKYDAN(+.98)QQ	738.621	0.01	60	0	8.1		Deamidation (NQ); Oxidation (M)	73400	0	0	0	0	0	0	0	0	0	0	0	0	0	0	0	0	0	0	0	0	0	0	0	0	0	0	0
IFKKGSR	835.538	0.11	60	5.1	11.17			0	0	0	18800	0	0	0	0	0	0	0	10200	12400	12300	0	8810	10900	0	0	0	0	0	0	0	0	0	0	0
SDQ(+.98)SQASGTTGGRR	704.819	0.24	60	5.7	9.31		Deamidation (NQ)	17800	4020	0	5090	0	0	8260	0	0	3870	2240	15100	2810	3450	10200	815	0	0	0	0	0	0	0	0	0	0	0	0
RWQCDGQNDCGDNSDEEN(+.98)CAPRECTESEF	1113.38	0.17	60	7.1	3.8		Deamidation (NQ)	5870	6060	0	6360	0	0	2650	11700	7600	11900	1290	0	0	11200	9060	0	0	0	0	0	0	0	0	0	0	0	0	0
RSPGAPGPLTLKEVEELE	641.345	0.03	60	3.1	4.49	sp|Q15942|ZYX_HUMAN		3390	6670	0	6020	0	0	0	0	0	5030	19100	13100	0	0	10200	0	10300	0	0	0	0	0	0	0	0	0	0	0
YDEPILKFLSDVSLKFSK	710.395	0.01	60	6.2	6.12			0	10400	0	12200	0	0	11000	0	0	0	23400	0	0	0	0	17400	0	0	0	0	0	0	0	0	0	0	0	0
ADEEEQWSDDFDSDYENPDEHSDSEMY	821.808	0.03	60	4.5	3.35			0	1260	0	27500	0	0	38300	0	0	0	6520	1810	0	0	0	0	0	0	0	0	0	0	0	0	0	0	0	0
NAPFSGAPN(+.98)GNQM(+15.99)SCG	523.539	0.06	60	1.9	5.52	sp|Q14686|NCOA6_HUMAN	Deamidation (NQ); Oxidation (M)	23800	2440	0	11300	0	0	18200	0	2640	4150	0	0	0	0	13300	0	0	0	0	0	0	0	0	0	0	0	0	0
Q(-17.03)AGAAGSRMNFRPGVLSS	596.964	0.06	60	4.1	12		Pyro-glu from Q	17300	5060	0	0	0	21100	0	11900	0	0	0	0	0	7120	2120	11800	0	0	0	0	0	0	0	0	0	0	0	0
PKAAV	485.325	0.12	60	6.9	9.18			0	0	14000	0	0	25100	8170	5100	0	7680	0	59.6	0	16500	0	0	0	0	0	0	0	0	0	0	0	0	0	0
E(-18.01)DSDM(+15.99)LAAGGKIE	667.303	0.2	60	4.5	3.92		Pyro-glu from E; Oxidation (M)	30700	1470	0	13700	0	0	10700	6430	0	2080	0	0	0	3060	9310	0	0	0	0	0	0	0	0	0	0	0	0	0
VTKKKKIGK	515.358	0.31	60	5.5	10.6			6170	7040	4810	2090	0	6300	3040	6930	3930	3340	6180	6420	3370	3650	1250	7290	5700	0	0	0	0	0	0	0	0	0	0	0
GLPGPPDVPDH	550.771	0.01	60	4.1	4.2			0	0	2890	0	17900	54300	0	1170	0	0	0	0	0	0	0	0	1560	0	0	0	0	0	0	0	0	0	0	0
KRKGKFKRSRLKLKDGHRISLP	883.549	0.22	60	5.6	12.02			0	1580	0	3550	7770	17800	2790	8470	0	1100	1280	6770	3430	3170	95.8	19100	1990	0	0	0	0	0	0	0	0	0	0	0
IVKKGYLLK	531.357	0.25	60	4.4	10			4480	7770	0	0	6680	0	3160	8580	3760	3550	6980	6630	6760	0	5090	9480	6260	0	0	0	0	0	0	0	0	0	0	0
Q(-17.03)GAKIPKPEASFSPR	532.623	0.09	60	5.7	9.99		Pyro-glu from Q	0	0	0	0	8570	31200	0	2650	0	0	0	0	0	0	0	37100	0	0	0	0	0	0	0	0	0	0	0	0
EEDEEVTEEAEMEPEDKGH	744.627	0.04	60	3.6	3.8			0	0	13100	0	11100	6840	0	8170	1310	2810	3080	9610	3080	3980	0	4980	12200	0	0	0	0	0	0	0	0	0	0	0
FLN(+.98)STAGTSGGAYDHS	397.159	0.17	60	4.1	5.08		Deamidation (NQ)	0	4130	0	16400	3400	0	0	0	0	5650	4140	0	6290	5740	1880	18600	15100	0	0	0	0	0	0	0	0	0	0	0
EEGEFSEAREDMAA	785.808	0.03	60	10	3.83	sp|P68366|TBA4A_HUMAN		10200	0	2360	0	0	1800	33700	0	4770	3520	0	16000	0	0	6300	0	3900	0	0	0	0	0	0	0	0	0	0	0
KKLLHGL	404.78	0.17	60	4.8	10			7710	5360	4610	4710	9740	12300	7110	4840	0	2330	5350	6700	0	1540	4470	2820	3570	0	0	0	0	0	0	0	0	0	0	0
ASGN(+.98)GGREGDYCSCDGY	856.295	0.09	60	4.6	4.03		Deamidation (NQ)	4500	13100	0	4390	0	0	23200	0	0	0	0	0	0	10300	28600	0	0	0	0	0	0	0	0	0	0	0	0	0
SSSCTSYSSCLGCLADQGCGWCLTS	630.5	0.27	60	5.8	3.8			0	2520	0	7520	3080	0	3990	0	5620	6200	0	2980	13700	12900	2860	22900	0	0	0	0	0	0	0	0	0	0	0	0
APVVILP	708.47	0.43	60	4.5	5.57			0	0	7550	0	11900	13900	0	4830	3560	3140	1840	5160	4680	7190	0	11200	9400	0	0	0	0	0	0	0	0	0	0	0
AEEEDAIHALFGSM(+15.99)	768.333	0.05	60	6	4		Oxidation (M)	22300	7490	0	18600	0	0	8030	0	0	0	6670	4350	0	3970	13200	0	0	0	0	0	0	0	0	0	0	0	0	0
HGYSCDCSN(+.98)TAYDGT	532.185	0.11	60	3	4.2		Deamidation (NQ)	0	0	51800	0	0	7430	0	0	0	0	0	0	0	0	0	0	25800	0	0	0	0	0	0	0	0	0	0	0
KAKKAT	646.433	0.1	60	6.8	10.3			0	0	4300	885	5160	1700	0	10800	24300	0	10200	1070	1110	9480	1570	0	15300	0	0	0	0	0	0	0	0	0	0	0
KPEQ(+.98)VHQYYSCLPEEKVPYVNSPGE	585.075	0.06	60	4.9	4.91		Deamidation (NQ)	0	457	0	0	17800	12000	0	1200	0	6330	0	5450	2230	8620	0	0	32000	0	0	0	0	0	0	0	0	0	0	0
QLGAQSPGRGTTLARGSSARAQ(+.98)GPG	794.732	0.04	60	4	12.3		Deamidation (NQ)	0	0	9720	0	17500	46400	0	4380	0	0	0	0	0	4190	0	0	4410	0	0	0	0	0	0	0	0	0	0	0
TLLEQ(+.98)TPKED	587.793	0.03	60	4.6	4.14		Deamidation (NQ)	0	0	17500	0	55200	0	0	0	0	0	0	0	0	0	0	14200	0	0	0	0	0	0	0	0	0	0	0	0
Q(-17.03)EKNPLPSKETIEQE	876.933	0.04	60	2.4	4.49	sp|P62328|TYB4_HUMAN	Pyro-glu from Q	0	0	14100	0	19400	17700	0	0	0	0	0	0	0	5420	0	8290	22300	0	0	0	0	0	0	0	0	0	0	0
GLIFI	562.376	0.24	60	4.8	5.52			0	0	10100	0	21400	19100	0	0	0	0	0	0	0	8750	0	16300	11600	0	0	0	0	0	0	0	0	0	0	0
TVGSLAGQPLQERAQAWGERL	756.4	0.15	60	6.1	5.81			37000	8820	0	0	0	0	0	27900	6330	0	0	7230	0	0	0	0	0	0	0	0	0	0	0	0	0	0	0	0
FLAEGGGV	375.195	0.1	60	7.8	4	sp|P02671|FIBA_HUMAN		38000	0	0	0	0	0	0	539	0	17200	3790	8740	4160	4180	10900	0	0	0	0	0	0	0	0	0	0	0	0	0
SVMPSPKVSDTVVEPYN	924.951	0.11	60	10.1	4.37			0	0	0	0	0	0	0	0	3020	3570	2810	16600	3220	10900	3300	6710	38900	0	0	0	0	0	0	0	0	0	0	0
Q(-17.03)LGLPGPPDVPDHAAYHPF	1005.99	0.1	60	9.2	5.05		Pyro-glu from Q	5180	3800	6860	0	3360	18200	0	19200	4410	868	0	2480	1260	3710	372	12400	6950	0	0	0	0	0	0	0	0	0	0	0
SVPNGPSPEEVEQQKRQQPGPSEHIERRVSNAG	725.563	0.13	60	1.9	5.6			0	0	18500	0	0	16100	0	3430	3130	2620	0	5290	3830	5400	860	0	30700	0	0	0	0	0	0	0	0	0	0	0
Q(-17.03)FLEQ(+.98)YFHDSDLAQ(+.98)FMRLFGGNFAHQASVARVVGQQG	1046.75	0.07	60	5.6	6		Pyro-glu from Q; Deamidation (NQ)	25200	0	0	0	0	0	495	2040	0	1550	0	19900	4540	3510	4480	0	28500	0	0	0	0	0	0	0	0	0	0	0
EAMLQ(+.98)ANHYDMDM	523.87	0.06	60	6.5	4.02		Deamidation (NQ)	0	0	0	0	0	0	15900	3210	7800	0	9060	14200	30200	10800	0	0	0	0	0	0	0	0	0	0	0	0	0	0
SRQLGLPGPPDVPDHAAYHP	531.77	0.1	60	5.3	5.93			0	0	17400	0	7540	31400	0	18800	5180	0	0	0	1060	4960	0	5080	0	0	0	0	0	0	0	0	0	0	0	0
A(+42.01)QQAADKYLYVDKNF	908.446	0.06	60	5.4	6		Acetylation (Protein N-term)	5850	14000	0	0	0	0	0	11800	0	6000	6580	16200	3800	0	17100	0	10900	0	0	0	0	0	0	0	0	0	0	0
Q(-17.03)GVN(+.98)DNEEGFF	620.246	0.22	60	7.5	3.57	sp|P02675|FIBB_HUMAN	Pyro-glu from Q; Deamidation (NQ)	2420	0	4960	0	27100	7940	1280	4000	7530	6230	0	0	0	11900	1510	0	17600	0	0	0	0	0	0	0	0	0	0	0
QWSLSQ(+.98)M(+15.99)NQQ(+.98)MAGMSISSATPT	601.272	0.09	60	6.5	5.52		Deamidation (NQ); Oxidation (M)	0	0	26600	0	19100	0	0	0	1900	449	0	2350	0	10000	0	11900	21900	0	0	0	0	0	0	0	0	0	0	0
GEFVSETESRGSESGIFTNTKESSSHHPGIAEFPSRG	788.367	0.08	60	8.2	5.06	sp|P02671|FIBA_HUMAN		0	1300	15800	0	10800	11800	0	16500	20100	0	0	0	2820	7920	0	3090	4190	0	0	0	0	0	0	0	0	0	0	0
PQSPSLLSKRKKVKMKREKASSSGKRQSSRTVDSDPTVLSIGGSKP	991.559	0.21	60	7.1	11.17			20800	15500	0	4170	0	0	15600	6370	0	1780	0	0	11000	0	10100	0	9230	0	0	0	0	0	0	0	0	0	0	0
KLVAA	501.324	0.16	60	2.7	8.75	sp|A3KMH1|VWA8_HUMAN		0	0	0	0	32400	31500	0	0	0	0	0	0	0	0	0	17800	13500	0	0	0	0	0	0	0	0	0	0	0
E(-18.01)CCCQDGEAWSQ(+.98)QCA	548.513	0.26	60	4.4	3.57		Pyro-glu from E; Deamidation (NQ)	17600	4710	0	12200	0	0	10200	0	1400	0	2160	11400	5840	0	11600	12300	9210	0	0	0	0	0	0	0	0	0	0	0
QHCQMCECDS	592.185	0.25	60	2.8	4.35			51000	23200	0	0	0	0	11200	0	0	3980	0	0	0	0	9460	0	0	0	0	0	0	0	0	0	0	0	0	0
QLGLPGPPDVPDHAAYHPF	676.669	0.08	60	4.2	5.05			0	35300	0	9640	0	8320	5130	25700	8560	0	0	0	0	0	3290	3720	0	0	0	0	0	0	0	0	0	0	0	0
SSSSHSGNSGSH	377.486	0.03	60	2.7	6.66			91300	0	0	0	0	0	0	0	0	0	0	0	4410	0	0	5410	0	0	0	0	0	0	0	0	0	0	0	0
G(+42.01)EDAAQAEKFQHPGSDM	930.393	0.31	60	7.7	4.31		Acetylation (Protein N-term)	0	0	11100	0	12200	21400	0	0	3580	2200	0	10000	1830	9380	0	13600	18600	0	0	0	0	0	0	0	0	0	0	0
QNSSGVM(+15.99)GGPQKMLMPSQ(+.98)FPNQ(+.98)GQQ	674.29	0.18	60	5.3	8.75		Oxidation (M); Deamidation (NQ)	20400	15800	12200	7120	0	2930	1590	7430	15400	1930	0	0	2520	3050	4240	1730	7780	0	0	0	0	0	0	0	0	0	0	0
FDKSKLKKTETQEKNPLPSKETIEQEKQAGES	735.987	0.08	60	12.8	6.39	sp|P62328|TYB4_HUMAN		0	0	19900	0	17000	15500	0	0	3250	0	1410	12300	3000	11600	1690	0	18700	0	0	0	0	0	0	0	0	0	0	0
KQQCNN(+.98)PCEQFNGGCSHICAPGPNGAECQ(+.98)	1012.72	0.13	60	6.8	5.4		Deamidation (NQ)	4650	133	0	30300	0	0	36700	0	0	0	1740	6860	0	7220	5210	5790	7360	0	0	0	0	0	0	0	0	0	0	0
ASPPATM(+15.99)AANESQ(+.98)EIDEDEGIHSHEGSDLS	1047.78	0.23	60	6.8	3.89		Oxidation (M); Deamidation (NQ)	5930	0	0	0	17000	18500	0	10600	6920	1580	0	5450	9930	0	0	25700	5050	0	0	0	0	0	0	0	0	0	0	0
SRQLGLPGPPDVPDHAA	576.3	0.06	60	4.5	5.19			0	0	28600	0	12300	55200	0	11100	0	0	0	0	0	0	0	0	0	0	0	0	0	0	0	0	0	0	0	0
PADKCMPCSCHPQGS	780.791	0.22	60	6.5	7.05			0	0	0	29200	0	0	23100	0	0	0	0	19100	4670	8040	15300	0	8480	0	0	0	0	0	0	0	0	0	0	0
EILESEEKGDPNKPSGFRSVKAPVT	679.352	0.15	60	6.4	5.01	sp|O00151|PDLI1_HUMAN		0	0	14600	0	16500	0	0	0	1730	1310	0	14500	2710	14900	0	5360	38300	0	0	0	0	0	0	0	0	0	0	0
FTSSTSYNRGDSTFESKSYKMA	624.284	0.21	60	4.9	8.43	sp|P02671|FIBA_HUMAN		18400	9030	0	23100	4160	0	0	0	0	6650	2480	9780	4900	16900	4590	0	11300	0	0	0	0	0	0	0	0	0	0	0
KIGKKPVAK	484.833	0.18	60	11.4	10.48			9780	10500	0	4930	9860	8450	3730	8560	3930	7970	11700	7390	0	3540	6470	8580	8820	0	0	0	0	0	0	0	0	0	0	0
SSKITHRIHWESASLL	467.006	0.27	60	3.3	8.51	sp|P01024|CO3_HUMAN		0	10200	20800	0	11900	11100	0	21500	0	4610	6700	6530	4750	4090	0	7860	6560	0	0	0	0	0	0	0	0	0	0	0
NNLTMN(+.98)CCENCGSYC	835.262	0.03	60	3.9	4		Deamidation (NQ)	90900	3580	0	11800	0	0	0	5810	3210	0	0	0	1470	0	0	0	0	0	0	0	0	0	0	0	0	0	0	0
APPKPPLPEGEVPPPRPPPPEEKDEEFPEQ	832.414	0.04	60	3.9	4.22	sp|P18206|VINC_HUMAN		0	0	30200	0	28400	0	0	4890	17000	2490	0	5910	4230	11800	0	0	13700	0	0	0	0	0	0	0	0	0	0	0
DSGGQEAN(+.98)N(+.98)PN(+.98)CCNCI	547.853	0.17	60	6.8	3.67		Deamidation (NQ)	9840	6060	7660	5240	0	0	8250	13800	5420	4000	9580	7140	13600	8930	8620	12300	0	0	0	0	0	0	0	0	0	0	0	0
PN(+.98)FELLLGPICLPLVDRFIQLLKVAQ(+.98)A	1008.25	0.17	60	5.9	6.45		Deamidation (NQ)	11800	0	0	0	0	0	0	0	13300	0	0	0	11900	11600	6700	32300	33200	0	0	0	0	0	0	0	0	0	0	0
QLLHRVK	447.283	0.13	60	6.8	11			256	0	16700	0	27600	24800	0	0	8300	8060	0	95.1	13700	11200	10200	0	0	0	0	0	0	0	0	0	0	0	0	0
Q(-17.03)FTSSTSYNRGDSTFESKSYKMADEAGSEADHEGTHSTKRGHAKSRPV	1049.88	0.13	60	3.5	7.03	sp|P02671|FIBA_HUMAN	Pyro-glu from Q	11600	4400	14400	0	13100	9800	0	12500	12300	7270	4720	7510	3390	10400	4920	5060	0	0	0	0	0	0	0	0	0	0	0	0
CDDQ(+.98)SDEEG	499.641	0.21	60	3.9	3.33		Deamidation (NQ)	22700	4210	23500	6170	24700	0	2540	0	8430	5270	6330	0	0	8800	9700	0	0	0	0	0	0	0	0	0	0	0	0	0
RWQCDGQNDCGDN(+.98)SDEEN(+.98)CAPRECTESEF	1113.71	0.11	60	8.1	3.8		Deamidation (NQ)	43100	16400	0	0	0	0	0	0	0	0	20100	0	18000	0	0	11600	13200	0	0	0	0	0	0	0	0	0	0	0
SYALTSEEAERSDGDPVQPAVLQVHQTS	1005.48	0.08	60	6.4	4.17			4620	2120	19300	0	10000	9460	0	4030	10400	4140	3170	15600	4690	7560	4520	8870	14700	0	0	0	0	0	0	0	0	0	0	0
EILESEEKGDPNKPSGF	625.97	0.04	60	3.2	4.25	sp|O00151|PDLI1_HUMAN		0	0	13900	0	16700	50600	0	2720	0	0	0	0	0	5980	0	22400	11000	0	0	0	0	0	0	0	0	0	0	0
GDSTFESKSYKMADEAGSEADHEGTHST	744.312	0.05	60	7.4	4.43	sp|P02671|FIBA_HUMAN		9790	837	13800	0	13400	30500	0	7020	5180	3190	2070	6640	1490	2710	0	27100	0	0	0	0	0	0	0	0	0	0	0	0
YLQGAKIPKPEASFSPR	473.012	0.07	60	4.9	9.7			0	0	0	0	15200	14400	0	0	0	0	0	0	0	8300	0	76600	9460	0	0	0	0	0	0	0	0	0	0	0
AIQLTYNPDESSKPNMIDAATLK	840.758	0.14	60	5.9	4.56			75100	8160	0	18000	0	0	24500	0	0	0	0	0	0	0	0	0	0	0	0	0	0	0	0	0	0	0	0	0
CKNNGMCRDGWNRYVCDCSGTGY	651.259	0.23	60	4.5	7.87			0	0	0	9730	14800	3720	0	0	4710	5930	4150	7750	11100	8300	3050	28800	24000	0	0	0	0	0	0	0	0	0	0	0
QVLKIIATFK	580.88	0.26	60	8.7	10			8910	14900	6430	2480	9710	9570	8240	11300	11500	0	3910	4050	9070	5190	7020	5680	8800	0	0	0	0	0	0	0	0	0	0	0
VLEEDEEVTEEAEMEPEDKGH	815.346	0.1	60	5.4	3.8			0	3850	3340	0	16200	12800	0	15100	13300	4400	9130	7950	6440	6780	3830	6000	18100	0	0	0	0	0	0	0	0	0	0	0
NRGDSTFESKSYKMADEAGSEADHEGTHSTKRGHA	759.54	0.06	60	3.6	5.81	sp|P02671|FIBA_HUMAN		5210	0	51500	3120	25200	27200	0	6160	3790	0	0	0	0	5450	0	0	0	0	0	0	0	0	0	0	0	0	0	0
E(-18.01)EEEDQNEDQ(+.98)DVPD	837.293	0.02	60	5.2	3.17		Pyro-glu from E; Deamidation (NQ)	31900	0	0	56900	0	0	0	0	0	0	0	0	0	0	41500	0	0	0	0	0	0	0	0	0	0	0	0	0
DSQNDCSDN(+.98)SDEEN	786.745	0.23	60	6.5	3.25		Deamidation (NQ)	17300	18400	0	3390	0	0	10800	0	0	0	9820	27100	11000	0	21400	7710	5180	0	0	0	0	0	0	0	0	0	0	0
SAKPTKPAASDLPVPAEGVRNI	555.308	0.14	60	4.3	8.31			0	0	10300	0	30700	41100	0	0	1040	1280	0	4360	1820	15200	0	20800	6550	0	0	0	0	0	0	0	0	0	0	0
SYSKQFTSSTSYNRGDSTFES	793.681	0.3	60	4.3	5.79	sp|P02671|FIBA_HUMAN		11100	2300	1950	5040	5080	3740	4660	0	3920	4300	2160	7800	9000	10300	2100	53100	7260	0	0	0	0	0	0	0	0	0	0	0
Q(-17.03)GVNDNEEG	472.682	0.21	60	8.3	3.57	sp|P02675|FIBB_HUMAN	Pyro-glu from Q	11800	2590	18700	5190	15900	27300	0	5000	6950	3410	3650	4680	3510	6660	5780	5770	7630	0	0	0	0	0	0	0	0	0	0	0
SQ(+.98)AGQ(+.98)QGLVEPTQFARANQAIQMACQSLGEPGCT	705.126	0.13	60	4.7	4.53		Deamidation (NQ)	15800	0	6200	1020	0	34800	0	0	0	2490	2320	5130	11700	10200	2830	35100	7030	0	0	0	0	0	0	0	0	0	0	0
RVIVV	585.415	0.45	60	3.9	9.75			7620	15200	5510	3860	4710	7730	7630	17700	10900	5250	10800	4950	6510	5660	5370	7310	9010	0	0	0	0	0	0	0	0	0	0	0
HN(+.98)ECATST	863.328	0.17	60	4.1	5.24		Deamidation (NQ)	0	7710	8400	0	0	12500	3980	49500	25300	0	0	0	0	6470	0	22200	0	0	0	0	0	0	0	0	0	0	0	0
AACGAADCEQ(+.98)CT	572.179	0.09	60	4.1	3.67		Deamidation (NQ)	0	0	34900	0	0	45800	0	0	0	0	0	0	0	12200	0	18800	24400	0	0	0	0	0	0	0	0	0	0	0
SSSYFSAQGYLSSREQEGTEST	801.01	0.13	60	6.9	4.25			21700	0	0	5440	7570	23700	0	13000	15300	5040	5260	0	0	7390	1410	27100	5220	0	0	0	0	0	0	0	0	0	0	0
GPPDVPDHAAYHPF	507.237	0.19	60	3.5	5.05			0	0	13000	0	16700	35400	0	2700	1250	0	0	0	0	15700	0	29900	23600	0	0	0	0	0	0	0	0	0	0	0
GVLSSRQLGLPGPPDVPDHAA	695.035	0.11	60	4	5.21			0	0	16200	0	21700	50000	0	33900	17000	0	0	0	0	0	0	0	0	0	0	0	0	0	0	0	0	0	0	0
QRRRKLRRRKTISGIPR	726.482	0.1	60	7.4	12.78			0	0	4210	0	33800	0	0	5120	0	9400	16400	15200	15600	4520	8520	0	26200	0	0	0	0	0	0	0	0	0	0	0
KLVKYLLVK	552.377	0.33	60	6.2	10			8950	8110	7740	0	9500	12000	7310	8990	12900	6880	10500	2490	6660	6570	6070	12500	14400	0	0	0	0	0	0	0	0	0	0	0
KYN(+.98)KEQ(+.98)QLKKITAKQKHLQ(+.98)AILGGA	947.23	0.24	60	5.9	10.13		Deamidation (NQ)	0	0	21600	3580	0	5750	3100	27000	5330	8550	0	14600	7920	16300	0	0	31200	0	0	0	0	0	0	0	0	0	0	0
QQ(+.98)Q(+.98)QQQGAGPGIGPGMANHNQFQQPQ(+.98)GV	734.074	0.09	60	3.1	6.74	sp|Q09472|EP300_HUMAN	Deamidation (NQ)	0	0	0	74600	0	0	24800	0	0	6720	7600	0	27400	0	1460	0	4140	0	0	0	0	0	0	0	0	0	0	0
SSSYSKQFTSSTSYNRGDSTFESKSYKM(+15.99)ADEAGSEADHEGTHST	961.012	0.09	60	6.3	5.01	sp|P02671|FIBA_HUMAN	Oxidation (M)	6150	5920	15100	0	16800	17600	6540	13500	10200	0	4150	0	7090	8780	0	35100	0	0	0	0	0	0	0	0	0	0	0	0
CVEN(+.98)ECVCDEGFT	724.743	0.11	60	4.4	3.5		Deamidation (NQ)	64.3	14700	0	3810	0	0	29200	1060	0	6910	19000	17000	24000	2470	23700	954	5140	0	0	0	0	0	0	0	0	0	0	0
GDSTFESKSYKMADEAGSEADHEGTHSTKRGHA	705.514	0.07	60	4.7	5.36	sp|P02671|FIBA_HUMAN		10700	3210	17900	4440	16100	32300	1700	0	3410	2480	0	5220	0	8210	2020	33500	7530	0	0	0	0	0	0	0	0	0	0	0
EEDALSLGAEACN(+.98)FM(+15.99)	808.827	0.15	60	6	3.5		Deamidation (NQ); Oxidation (M)	8930	3670	0	9290	0	0	12800	0	0	12000	19900	15600	8400	11300	8940	20600	17500	0	0	0	0	0	0	0	0	0	0	0
Q(-17.03)AGAAGSRMNFRPGVL	807.913	0.07	60	5.8	12		Pyro-glu from Q	7770	3380	23300	0	21700	30900	0	20500	20900	0	0	0	0	0	0	21100	0	0	0	0	0	0	0	0	0	0	0	0
DSGGQEANNPN(+.98)CCN(+.98)CI	547.519	0.21	60	5.1	3.67		Deamidation (NQ)	15600	12300	0	14200	0	0	16300	0	20700	10000	22300	0	16700	0	15700	0	5940	0	0	0	0	0	0	0	0	0	0	0
SSGGMDQ(+.98)	682.239	0.08	60	3	3.8	sp|Q5VT25|MRCKA_HUMAN	Deamidation (NQ)	0	0	0	0	13100	0	0	36400	0	38700	0	0	0	41500	0	22500	0	0	0	0	0	0	0	0	0	0	0	0
PPKPPLPEGEVPPPRPPPPEEKDEEFPEQKAGEVIN	794.206	0.13	60	6.3	4.34	sp|P18206|VINC_HUMAN		0	0	37100	0	17200	50100	0	13100	19900	3680	3450	12500	0	0	0	0	0	0	0	0	0	0	0	0	0	0	0	0
DNEEGFFSA	1015.4	0.31	60	5	3.57	sp|P02675|FIBB_HUMAN		56600	29800	621	50200	0	0	2380	0	0	12300	0	6370	0	0	0	0	0	0	0	0	0	0	0	0	0	0	0	0
GKSSSYSKQFTSSTSYNRGDSTFES	685.308	0.13	60	8.2	8.43	sp|P02671|FIBA_HUMAN		14500	5160	2220	3070	16200	6850	1980	0	4470	4270	2400	9680	10300	15200	3240	52200	10500	0	0	0	0	0	0	0	0	0	0	0
QGGLAEVLLAAKEHRRPRETRVIAVLGKAGQ	1108.64	0.18	60	7	10.83			5130	0	27200	2670	27900	0	0	29500	0	997	1310	9270	0	8800	0	51600	0	0	0	0	0	0	0	0	0	0	0	0
EGEYEYTGAN(+.98)EYDN	552.207	0.19	60	3.1	3.45		Deamidation (NQ)	65900	0	0	0	0	0	0	0	17800	0	0	0	25700	0	34100	0	22200	0	0	0	0	0	0	0	0	0	0	0
TAQSGN	577.249	0.27	60	1.8	5.19			0	2080	0	0	0	0	0	9730	35600	1500	14700	0	16400	7080	0	49900	32100	0	0	0	0	0	0	0	0	0	0	0
HCLSDAEGDFSDPCAC	418.149	0.19	60	4.4	3.84			40100	7640	0	12200	0	0	0	6100	5680	4090	14900	0	10100	7970	61800	0	0	0	0	0	0	0	0	0	0	0	0	0
ECISVHVGQAGVQM(+15.99)GNACWELYCLEHGIQPDGQ	897.632	0.4	60	6.7	4.39	sp|P68366|TBA4A_HUMAN	Oxidation (M)	11600	1330	3180	18100	12800	14700	11900	6250	14000	5930	0	10700	7830	8910	3190	22900	18100	0	0	0	0	0	0	0	0	0	0	0
QEKN(+.98)PLPSKETIEQEKQAGES	593.548	0.04	60	5.4	4.65	sp|P62328|TYB4_HUMAN	Deamidation (NQ)	0	0	19600	0	59200	40500	0	0	0	3130	0	2540	0	4580	0	4510	43600	0	0	0	0	0	0	0	0	0	0	0
LHAGLIIGILILVLIVATAILVT	780.51	0.23	60	5	6.74			0	7590	58200	13500	35900	0	0	0	31000	11800	7010	9710	3900	0	0	0	0	0	0	0	0	0	0	0	0	0	0	0
QDDVEKLFGVR	435.895	0.06	60	2.9	4.56			0	0	58000	0	57600	0	0	0	0	0	0	0	0	0	0	0	63800	0	0	0	0	0	0	0	0	0	0	0
ESIDEQ(+.98)EYEACAGGA	786.801	0.25	60	4.7	3.45		Deamidation (NQ)	68800	0	0	0	12500	0	0	0	13900	24200	15200	0	16600	0	0	9520	19600	0	0	0	0	0	0	0	0	0	0	0
SEKVKKAKAKSRIKMKKARKILAEKRAA	1066.02	0.16	60	7.2	11.29			30000	13200	0	4170	0	0	13800	26100	32500	11000	17700	0	7820	0	25100	0	0	0	0	0	0	0	0	0	0	0	0	0
KDSGGESPCVSCS	628.248	0.11	60	4.7	4.37			0	0	0	69600	0	0	47000	0	0	11300	0	47800	0	3240	0	4320	0	0	0	0	0	0	0	0	0	0	0	0
SYSKQFTSSTSYNRGDSTFESKSY	690.061	0.19	60	5.9	8.1	sp|P02671|FIBA_HUMAN		24100	2320	3520	9660	11800	3610	9030	0	6080	6270	3100	8890	9590	7240	4110	59500	15600	0	0	0	0	0	0	0	0	0	0	0
KIFPK	632.417	0.36	60	4.1	10			8920	0	13600	10800	14700	21100	6880	13600	12300	3130	16400	17600	9460	0	9650	19600	7530	0	0	0	0	0	0	0	0	0	0	0
AGDYVSEEVWYRVIQ(+.98)IVINRDDVQ	956.479	0.24	60	6.2	4.11		Deamidation (NQ)	0	0	26900	0	21300	18200	0	4340	6840	3790	0	26800	4200	13100	2060	20500	38800	0	0	0	0	0	0	0	0	0	0	0
PQ(+.98)VPPRVPIPPRP	725.925	0.14	60	4.5	12		Deamidation (NQ)	0	54800	31500	98000	0	0	0	4560	0	0	0	0	0	0	0	0	0	0	0	0	0	0	0	0	0	0	0	0
VN(+.98)DNEEGFFSA	615.25	0.49	60	2.7	3.57	sp|P02675|FIBB_HUMAN	Deamidation (NQ)	48600	6270	0	20800	0	0	21800	0	4750	16200	6200	0	14600	15400	16900	10200	7570	0	0	0	0	0	0	0	0	0	0	0
LISLMSIEVLLLAVR	835.539	0.26	60	4.9	6			44500	22500	0	0	0	0	34900	11400	11100	17300	18800	0	0	0	30000	0	0	0	0	0	0	0	0	0	0	0	0	0
TPKKLLPTK	513.341	0.07	60	11.2	10.3			65700	89300	594	964	0	15500	0	1040	0	5260	987	0	0	0	12500	0	0	0	0	0	0	0	0	0	0	0	0	0
YNRGDSTFESKSYKMADEAGSEADHEGTHST	682.292	0.07	60	2.7	4.69	sp|P02671|FIBA_HUMAN		0	0	63700	0	9300	72300	0	26600	10800	0	1760	0	0	0	0	9250	6560	0	0	0	0	0	0	0	0	0	0	0
EEKCTYIVN(+.98)DHPWDSGADGGTSVQ(+.98)AEASL	1027.77	0.32	60	8.9	4.01		Deamidation (NQ)	41100	9790	0	49900	0	0	51100	0	0	0	4540	18800	2820	0	28500	0	0	0	0	0	0	0	0	0	0	0	0	0
EETKENEGFTVTAEG	820.865	0.12	60	3.7	3.98	sp|P01024|CO3_HUMAN		13700	0	41400	7130	44400	34800	3590	14000	5970	0	0	10300	12200	6470	2290	10200	7780	0	0	0	0	0	0	0	0	0	0	0
Q(-17.03)GVNDN(+.98)EEGF	546.711	0.13	60	6.8	3.57	sp|P02675|FIBB_HUMAN	Pyro-glu from Q; Deamidation (NQ)	0	0	0	0	71800	95100	0	14600	4330	2670	0	2560	0	12700	0	9070	9400	0	0	0	0	0	0	0	0	0	0	0
VAPEEHPVLLTEAPLNPK	652.026	0.08	60	2.8	4.75			0	0	36900	0	34500	32100	0	4190	7430	0	0	7070	5430	0	0	48500	47700	0	0	0	0	0	0	0	0	0	0	0
ADDEDDDEDGQDN(+.98)Q(+.98)GT	580.836	0.18	60	4.5	3.07	sp|Q86U86|PB1_HUMAN	Deamidation (NQ)	21100	24900	13900	18800	0	0	22000	18800	14300	0	21600	12600	13500	7660	21800	0	17500	0	0	0	0	0	0	0	0	0	0	0
Q(-17.03)NGAGEDNQQENKPS	799.826	0.14	60	6	4.14		Pyro-glu from Q	32400	4000	0	16200	0	0	15400	6920	0	10700	6570	23400	17800	23000	15900	37900	18700	0	0	0	0	0	0	0	0	0	0	0
GSESGIFTNTKESSSHHPGIAEFPSRG	564.07	0.14	60	3.5	6.02	sp|P02671|FIBA_HUMAN		7130	3350	25000	11800	28500	27200	0	0	0	0	0	0	13800	36200	0	53000	23400	0	0	0	0	0	0	0	0	0	0	0
DGLTMN(+.98)YCRN(+.98)PDADTGPWCFTMDPSIRWEYCN(+.98)LTRCSDTEGT	968.391	0.24	60	8.6	4.09		Deamidation (NQ)	8740	7880	26100	0	5320	34100	11400	20900	25900	1420	9910	4470	0	19500	0	42100	12100	0	0	0	0	0	0	0	0	0	0	0
A(+42.01)GSVADSDAVVKLDDGHLN	962.961	0.14	60	7.5	4.13		Acetylation (Protein N-term)	4760	7850	18800	1860	22400	0	0	24400	29300	13500	20500	27200	13400	14700	10200	0	24500	0	0	0	0	0	0	0	0	0	0	0
VEGEIAEEAAEKAT	723.85	0.11	60	7.4	3.98			5000	3820	23800	0	40100	27700	0	14800	14200	0	6340	18900	4430	14800	4870	15800	39400	0	0	0	0	0	0	0	0	0	0	0
YEGSYALTSEEAERSDGDPVQPAVLQVHQTS	1121.86	0.12	60	8	4.08			21400	14600	14200	0	0	11300	0	23500	45800	19500	16800	24000	7170	9120	12000	4660	15600	0	0	0	0	0	0	0	0	0	0	0
Q(-17.03)FTSSTSYNRGDSTFESKSYKM	845.355	0.05	60	6.9	8.43	sp|P02671|FIBA_HUMAN	Pyro-glu from Q	0	867	42500	9840	0	38000	9630	0	44100	0	13100	0	9980	38000	12600	0	32900	0	0	0	0	0	0	0	0	0	0	0
AQ(+.98)LPGN(+.98)QRAHN	604.29	0.09	60	3.4	9.8		Deamidation (NQ)	0	0	0	0	0	0	0	0	0	0	0	0	0	73000	0	0	179000	0	0	0	0	0	0	0	0	0	0	0
LGEFVSETESRGSESGIFTNTKESSSHHPGIAEFPSRG	810.984	0.13	60	8.6	5.06	sp|P02671|FIBA_HUMAN		10300	6710	38100	0	21900	32500	0	45900	51100	6510	9630	0	9420	21100	0	0	0	0	0	0	0	0	0	0	0	0	0	0
CCSDWQRHFDVALGRMVYVNKMTGLSTFIAPTEDI	801.582	0.09	60	4.6	5.43			41800	17900	10400	21500	0	0	11900	26100	10500	13800	13300	26200	17700	0	42800	0	0	0	0	0	0	0	0	0	0	0	0	0
ELQ(+.98)Q(+.98)ELSLKDQERVAEVSRVRVELQEQNGRLQ	953	0.05	60	5.4	4.82		Deamidation (NQ)	53600	1230	0	0	0	75600	0	0	0	0	13300	0	12200	0	0	98600	0	0	0	0	0	0	0	0	0	0	0	0
AVLEEDEEVTEEAEMEPEDKGH	839.025	0.12	60	5.7	3.8			13200	6860	21500	2600	18300	13300	2770	6880	31200	15400	17300	32900	9160	16200	13200	14800	24600	0	0	0	0	0	0	0	0	0	0	0
Q(-17.03)FTSSTSYNRGDSTFESKSYKMADEAGSEADHEGTHSTKRGHA	936.41	0.14	60	9.9	5.81	sp|P02671|FIBA_HUMAN	Pyro-glu from Q	1010	9300	38200	11000	30800	36400	3000	18000	28900	7650	6130	7370	5570	22000	6600	19700	11600	0	0	0	0	0	0	0	0	0	0	0
EEEGEEEGGGEEGEE	797.772	0.14	60	2.8	3.29			65700	23700	0	0	0	0	0	0	29100	0	45400	2110	25000	19500	42700	15400	0	0	0	0	0	0	0	0	0	0	0	0
SSGGSIGGRGS	921.429	0.33	60	5.9	9.47			20700	0	0	0	13900	18800	2850	0	0	27100	0	9710	16100	35000	33400	67900	26100	0	0	0	0	0	0	0	0	0	0	0
T(+42.01)EKAPEPHVEEDDDDELDSKLNY	910.732	0.41	60	6.2	3.92	sp|P52566|GDIR2_HUMAN	Acetylation (Protein N-term)	7670	7390	27500	2940	10200	14500	2630	33000	0	12800	19400	34300	15000	27000	11600	13500	36300	0	0	0	0	0	0	0	0	0	0	0
EDKTERELLESYIDGR	651.656	0.21	60	3	4.36			14900	8630	33200	3780	28300	14200	0	62300	41800	5160	24800	0	13900	7800	6230	12700	0	0	0	0	0	0	0	0	0	0	0	0
DKTERELLESYIDGR	608.643	0.14	60	2.7	4.51			49400	12900	3900	14100	0	0	7140	68600	24300	6980	34800	6890	4820	5730	41900	0	0	0	0	0	0	0	0	0	0	0	0	0
CQ(+.98)EHESENSPV	630.247	0.27	60	5.7	4.24		Deamidation (NQ)	0	20200	845	976	0	0	64400	0	0	27500	0	72400	15600	0	53800	16100	10800	0	0	0	0	0	0	0	0	0	0	0
SEETKENEGFTVTAEG	864.381	0.08	60	10.6	3.98	sp|P01024|CO3_HUMAN		40400	2500	36500	16600	17400	23600	4200	17700	13800	4180	4500	11800	24600	16800	6150	36500	10600	0	0	0	0	0	0	0	0	0	0	0
Q(-17.03)FTSSTSYNRGDSTFESKSYKMADEAGSEADHEGTHST	826.549	0.07	60	5.1	4.69	sp|P02671|FIBA_HUMAN	Pyro-glu from Q	12500	5760	61100	0	38400	58000	0	37000	34500	2890	5360	0	5270	3430	0	26300	0	0	0	0	0	0	0	0	0	0	0	0
Q(-17.03)EILESEEKGDPNKPSGFRSVKAPVT	707.111	0.12	60	7.1	5.01	sp|O00151|PDLI1_HUMAN	Pyro-glu from Q	0	0	0	0	58100	5370	0	3620	23700	17300	13000	52600	14000	27100	8340	11400	65700	0	0	0	0	0	0	0	0	0	0	0
SSSGGSSGGSSGGSSGN(+.98)S	702.273	0.27	60	4.5	5.24		Deamidation (NQ)	0	20800	0	69000	0	0	56400	0	0	10500	7980	0	0	9040	93600	17500	18700	0	0	0	0	0	0	0	0	0	0	0
DQYMLGILIYIQN(+.98)SDYEEITIDPTC	984.451	0.33	60	7.8	3.33		Deamidation (NQ)	85000	57300	2920	3900	0	0	24300	39900	12600	26000	7700	19700	0	10300	12100	0	11400	0	0	0	0	0	0	0	0	0	0	0
GSNGSPG	575.247	0.49	60	2.6	5.52	sp|Q96P44|COLA1_HUMAN		0	3690	0	5470	0	0	12600	52200	49900	10600	19500	7850	24100	42800	0	70900	19800	0	0	0	0	0	0	0	0	0	0	0
TATSEYQTFFNPR	521.247	0.3	60	3.9	5.66			21700	8640	6580	55900	0	0	23100	14700	10000	19300	9900	47400	5620	33600	30800	12300	21000	0	0	0	0	0	0	0	0	0	0	0
S(+42.01)DKPDMAEIEKFDKS	594.612	0.22	60	3.9	4.44	sp|P62328|TYB4_HUMAN	Acetylation (Protein N-term)	0	0	58900	0	53500	46800	0	15900	22000	7130	8010	22800	5260	17200	5840	18200	44900	0	0	0	0	0	0	0	0	0	0	0
GAVEGKEELPDENKSLEETLH	581.786	0.13	60	3.2	4.3			2780	0	44700	0	50100	44200	1010	1970	16000	7940	4620	35500	11400	24500	5490	36000	41400	0	0	0	0	0	0	0	0	0	0	0
EASCGLAQGQEL	603.274	0.22	60	7.2	3.8			121000	5740	0	71400	0	0	47600	0	0	0	10300	18500	0	6810	41300	0	9660	0	0	0	0	0	0	0	0	0	0	0
LVEGEIAEEAAEKAT	780.391	0.16	60	6.2	3.98			0	3690	23600	0	27700	33600	0	17900	27300	14600	18300	37800	15800	15900	4910	31800	60100	0	0	0	0	0	0	0	0	0	0	0
KKKRGT	717.492	0.48	60	4.3	11.26	sp|A3KMH1|VWA8_HUMAN		17900	26400	22800	11200	25500	22300	2300	37800	3940	17100	30700	21700	22500	21000	13800	27700	26800	0	0	0	0	0	0	0	0	0	0	0
SSYSKQFTSSTSYNRGDSTFESKSY	948.755	0.28	60	4.6	8.1	sp|P02671|FIBA_HUMAN		46400	0	7120	33200	18400	5840	12500	5930	19400	21200	3540	25300	29500	15600	10300	67300	36800	0	0	0	0	0	0	0	0	0	0	0
VKLFVT	706.453	0.57	60	4.2	8.72			8620	12800	34000	12400	34600	37300	14000	21000	19900	15800	21300	22400	19900	21000	13200	27600	27500	0	0	0	0	0	0	0	0	0	0	0
FLAEGGGVR	453.245	0.12	60	4.7	6	sp|P02671|FIBA_HUMAN		17600	27200	0	59800	0	0	44100	1140	786	31000	23800	62300	13100	13400	56400	6240	11900	0	0	0	0	0	0	0	0	0	0	0
S(+42.01)DKPDMAEIEKFDKSKLKKTETQEKNPLPSKETIEQEKQAGES	1241.13	0.36	60	8.1	5.02	sp|P62328|TYB4_HUMAN	Acetylation (Protein N-term)	35200	7820	48600	1500	15000	26700	2960	40700	36600	20800	0	72900	5040	0	12400	21900	23100	0	0	0	0	0	0	0	0	0	0	0
SSLASQNEGM(+15.99)DDTSSA	808.316	0.04	60	4	3.49		Oxidation (M)	104000	16100	0	46500	0	0	15300	0	0	63700	6070	0	0	13700	10200	98500	0	0	0	0	0	0	0	0	0	0	0	0
KKKVIM(+15.99)KKRKKLTLTRPTPLVT	875.235	0.24	60	4.6	12.05		Oxidation (M)	38700	21700	19300	10000	16700	25900	13200	46600	37200	21300	16000	23100	9130	37300	15800	0	26600	0	0	0	0	0	0	0	0	0	0	0
HWESASLL	471.737	0.31	60	4.3	5.24	sp|P01024|CO3_HUMAN		0	8650	14800	2730	88900	85200	8010	14200	0	7440	4180	7370	4230	4510	0	126000	7310	0	0	0	0	0	0	0	0	0	0	0
G(+42.01)GGGGGGGGGGGGGGGGGGQ(+.98)GQ(+.98)T	520.864	0.52	60	3	5.52		Acetylation (Protein N-term); Deamidation (NQ)	68400	25500	5880	64200	0	0	68400	3330	3900	14700	18900	0	16600	20900	51300	17100	19400	0	0	0	0	0	0	0	0	0	0	0
EETKENEGFTVTAEGK	590.279	0.11	60	6.6	4.33	sp|P01024|CO3_HUMAN		59400	2870	17600	11000	48800	23000	15800	16500	15800	19600	13200	39500	31100	14100	14500	15300	43900	0	0	0	0	0	0	0	0	0	0	0
FEKKSLEDKTERELLESYIDGR	672.099	0.07	60	6.5	4.77			7120	0	62300	0	43200	0	0	233000	26200	0	21400	0	0	0	16400	0	0	0	0	0	0	0	0	0	0	0	0	0
KSFM(+15.99)ETAM(+15.99)DVDSPENDIPMEITTAEP	733.329	0.04	60	8	3.66		Oxidation (M)	31500	1490	4190	52400	0	0	0	394	0	0	0	62500	18500	0	241000	0	0	0	0	0	0	0	0	0	0	0	0	0
KKAAL	530.386	0.53	60	4.6	10			15100	2790	39000	8090	36600	56500	16700	27500	24800	13900	17600	23000	32800	23300	6330	39500	35600	0	0	0	0	0	0	0	0	0	0	0
AFIALK	662.427	0.58	60	3.8	8.8			5520	10200	43000	13600	41000	52700	16400	24500	24800	16700	23200	24600	21900	24500	12100	35000	30200	0	0	0	0	0	0	0	0	0	0	0
Q(-17.03)FTSSTSYNRGDSTFESKSY	1137.99	0.12	60	3.5	6.07	sp|P02671|FIBA_HUMAN	Pyro-glu from Q	43100	1480	26500	5620	95700	24000	3480	34900	52300	8300	1870	4130	14100	19200	4040	69800	21000	0	0	0	0	0	0	0	0	0	0	0
CAVIYCN(+.98)DGFCELCGYSRAEVM(+15.99)QRPCT	762.804	0.13	60	10.1	4.68		Deamidation (NQ); Oxidation (M)	174000	107000	2300	0	0	0	652	0	309	21000	121	0	0	135000	6360	2350	1870	0	0	0	0	0	0	0	0	0	0	0
AKAVLEEDEEVTEEAEMEPEDKGH	679.303	0.18	60	2.6	3.99			14600	13200	51300	4010	34300	37700	3300	23000	34100	11000	25700	42200	20600	30100	17800	30100	71100	0	0	0	0	0	0	0	0	0	0	0
AGDGEGSAEGAGGPSGE	702.775	0.34	60	5.1	3.5			178000	0	0	86100	0	4780	44400	0	0	7600	0	67700	7820	4620	32800	22800	7960	0	0	0	0	0	0	0	0	0	0	0
SLDRNLPSDSQDLGQHGLEED	775.69	0.14	60	4.8	3.96			0	1930	50200	8510	24900	84400	7390	55400	34600	16700	10600	23100	18200	37200	5910	64000	55100	0	0	0	0	0	0	0	0	0	0	0
KKKKF	678.459	0.55	60	4	10.48			0	0	52700	9330	59500	79000	16700	30700	27100	17600	18300	28800	26100	32600	5120	58200	47700	0	0	0	0	0	0	0	0	0	0	0
GHRPLDKKREEAPSLRPAPPPISGGGY	577.312	0.27	60	4.9	9.69	sp|P02675|FIBB_HUMAN		0	2160	51500	1390	69100	126000	1830	4970	3370	0	0	10200	13300	41700	2030	146000	47600	0	0	0	0	0	0	0	0	0	0	0
NRGDSTFESKSYKMADEAGSEADHEGTHST	649.678	0.18	60	5	4.69	sp|P02671|FIBA_HUMAN		0	0	170000	2480	90100	164000	0	49000	13300	2050	2260	0	0	11500	0	22200	0	0	0	0	0	0	0	0	0	0	0	0
Q(-17.03)GVNDN(+.98)EEGFFSA	699.279	0.04	60	6.1	3.57	sp|P02675|FIBB_HUMAN	Pyro-glu from Q; Deamidation (NQ)	83400	104	35900	1290	71000	45800	1110	0	29100	46700	0	533	4400	48400	87000	30100	49500	0	0	0	0	0	0	0	0	0	0	0
KDRVLKLLNKN(+.98)GTVKKVSKLKRKEK	738.717	0.43	60	4.7	10.84		Deamidation (NQ)	184000	91600	10000	5250	0	7190	41300	56400	19600	30000	13100	22100	8300	24100	21800	0	23200	0	0	0	0	0	0	0	0	0	0	0
SVVPSPKVSDTVVEPYN	908.969	0.11	60	5.3	4.37			0	0	76700	0	55800	79000	0	7780	25800	5760	10900	52200	14500	49500	7890	39600	135000	0	0	0	0	0	0	0	0	0	0	0
VDDM(+15.99)IADLLVD	617.788	0.44	60	4.1	3.32	sp|Q8NFP9|NBEA_HUMAN	Oxidation (M)	163000	13400	0	57600	0	2370	24000	0	0	6540	12400	39500	38200	3270	192000	11000	7720	0	0	0	0	0	0	0	0	0	0	0
LFKRR	719.474	0.56	60	3.8	12.01			4750	17800	49400	20300	56400	73900	27200	38500	32000	23800	32600	39700	28000	32100	20400	50700	45200	0	0	0	0	0	0	0	0	0	0	0
AVPPNNSNAAEDDLPTVELQGVVPR	868.106	0.15	60	4.2	3.92			116000	31000	36700	27100	19000	67700	16400	72900	36900	8230	12000	16700	16600	17100	31100	47600	28300	0	0	0	0	0	0	0	0	0	0	0
QGASQ(+.98)HDDRASQDWDVVKAGQMM(+15.99)TAS	709.788	0.02	60	6.2	4.56		Deamidation (NQ); Oxidation (M)	0	0	1480	0	3300	0	0	0	0	0	2460	0	0	6090	0	249000	341000	0	0	0	0	0	0	0	0	0	0	0
EKKSLEDKTERELLESYIDGR	508.466	0.11	60	5.1	4.77			52400	0	67000	9460	45500	0	2770	284000	55000	11100	26600	4920	5730	17200	30500	0	0	0	0	0	0	0	0	0	0	0	0	0
SSSYSKQFTSSTSYN(+.98)RGDSTFESKSY	978.095	0.2	60	5.2	8.1	sp|P02671|FIBA_HUMAN	Deamidation (NQ)	204000	1550	10300	140000	24700	18400	19400	11600	8020	2120	20800	30500	13500	47100	29400	94700	46700	0	0	0	0	0	0	0	0	0	0	0
SSYSKQFTSSTSYNRGDSTFES	822.693	0.38	60	6.7	5.79	sp|P02671|FIBA_HUMAN		62800	11900	11100	46600	35600	14600	31200	6060	25300	28600	13800	44300	64300	71500	13400	198000	45400	0	0	0	0	0	0	0	0	0	0	0
NTTQAECCCTQ(+.98)GASWGDACDLCPSEDSAEF	1048.39	0.39	60	4.9	3.29		Deamidation (NQ)	121000	23900	18700	65900	0	0	0	121000	91500	17500	42500	58600	88700	0	5420	56700	19600	0	0	0	0	0	0	0	0	0	0	0
NDNEEGFFSA	565.225	0.22	60	6	3.57	sp|P02675|FIBB_HUMAN		243000	94900	0	209000	0	0	65200	0	0	36200	4730	26900	7860	21200	46500	0	0	0	0	0	0	0	0	0	0	0	0	0
S(+42.01)DKPDMAEIEKFDKSKLKKTETQ	548.483	0.17	60	4.1	6.03	sp|P62328|TYB4_HUMAN	Acetylation (Protein N-term)	0	0	114000	0	105000	103000	0	15600	23500	13300	7680	73400	17700	64600	0	72200	150000	0	0	0	0	0	0	0	0	0	0	0
GLPGPPDVPDHAAYHPF	596.289	0.16	60	4.2	5.05			14500	0	49400	5030	36100	318000	5490	162000	61500	6790	12000	14300	13500	19700	9650	22200	23600	0	0	0	0	0	0	0	0	0	0	0
Q(-17.03)QCPN(+.98)MCSGHGSCD	725.74	0.32	60	4.6	5.08		Pyro-glu from Q; Deamidation (NQ)	10700	30800	8480	74900	8370	305	69900	5170	13700	117000	63400	30200	202000	91800	0	36600	57800	0	0	0	0	0	0	0	0	0	0	0
SRQLGLPGPPDVPDHAAYHPF	757.714	0.17	60	3.2	5.93			145000	66000	47500	22400	10000	96900	13400	265000	26300	15700	35200	18200	5730	29100	34000	35200	14500	0	0	0	0	0	0	0	0	0	0	0
KKKSGK	675.448	0.62	60	3.5	10.48			0	16900	87700	29900	91000	125000	40100	56200	47000	32100	47500	58600	43700	47400	23500	84300	71100	0	0	0	0	0	0	0	0	0	0	0
RAVPPNNSNAAEDDLPTVELQGVVPR	920.14	0.18	60	7.6	4.32			213000	91400	59500	54900	0	71700	48800	99600	87500	13700	18100	24500	29000	37900	59200	0	22900	0	0	0	0	0	0	0	0	0	0	0
THRIHWESASLL	483.924	0.65	60	2.2	6.61	sp|P01024|CO3_HUMAN		56600	38900	78400	17300	91800	116000	57900	36700	5010	49600	32300	64600	72600	25400	56500	86100	54700	0	0	0	0	0	0	0	0	0	0	0
GQAGVQIGNACWELYCLEHGIQPDGQMPSDKTIGGGDDSFNTFFSETGAGK	1067.47	0.29	60	9.3	4.14			17800	0	123000	11600	180000	212000	40400	102000	59000	12300	0	29300	15200	99500	0	20200	25300	0	0	0	0	0	0	0	0	0	0	0
GDSGDDSDSEHGDGT	725.741	0.08	60	4	3.61	sp|Q9P1Y6|PHRF1_HUMAN		0	138000	5550	0	0	0	33300	72100	6460	0	141000	332000	52500	65500	0	52800	48700	0	0	0	0	0	0	0	0	0	0	0
Q(-17.03)GVNDNEEGFFS	663.265	0.23	60	6.6	3.57	sp|P02675|FIBB_HUMAN	Pyro-glu from Q	49300	10600	26600	47900	81900	8570	117000	13600	43100	32500	51600	74500	42500	54000	65400	138000	106000	0	0	0	0	0	0	0	0	0	0	0
E(-18.01)GDFLAEGGGVR	594.786	0.1	60	2.4	4.14	sp|P02671|FIBA_HUMAN	Pyro-glu from E	288000	23600	1380	129000	0	0	66400	0	0	11500	14100	109000	49800	9670	242000	24400	20400	0	0	0	0	0	0	0	0	0	0	0
KKSAKK	689.463	0.55	60	3.8	10.48			39000	53500	90300	40800	84300	136000	45100	63400	61000	41100	71500	75200	63100	43700	40500	87500	83300	0	0	0	0	0	0	0	0	0	0	0
QSKDDILILTVRLAVIVAVILT	798.511	0.22	60	5.5	5.96			153000	57700	116000	41300	92100	157000	4800	93400	127000	27900	3980	41700	0	5950	22600	178000	4750	0	0	0	0	0	0	0	0	0	0	0
GSSDNQSSSPQ(+.98)PAQ(+.98)Q(+.98)	507.53	0.23	60	4.2	3.8		Deamidation (NQ)	610000	133000	34100	57500	0	0	19400	14200	1520	27700	123000	30600	98100	8240	5290	5860	17600	0	0	0	0	0	0	0	0	0	0	0
LLDILLLLPLLIVCSLESFVKLFIPKRR	817	0.22	60	6.1	9.31			125000	30300	0	91400	0	0	197000	102000	181000	30500	60500	32200	58700	32700	71500	93200	81600	0	0	0	0	0	0	0	0	0	0	0
TAFGGRRAVPPNNSNAAEDDLPTVELQGVVPR	837.68	0.13	60	5.2	4.78			229000	89000	56500	63300	40400	35600	71000	65500	137000	23000	42900	68300	60800	42500	114000	38600	44500	0	0	0	0	0	0	0	0	0	0	0
EQNCCEECCCQPGCC	551.153	0.4	60	3.8	3.67	sp|Q9BYP8|KR171_HUMAN		152000	97600	53100	91900	0	61000	82700	118000	98700	45700	106000	58900	78800	49300	65500	45800	42900	0	0	0	0	0	0	0	0	0	0	0
S(+42.01)DKPDMAEIEKFDKSKLKKTETQE	717.612	0.26	60	3.5	5.09	sp|P62328|TYB4_HUMAN	Acetylation (Protein N-term)	11800	1600	19100	3270	192000	180000	0	0	68500	38700	20900	157000	45200	117000	22600	147000	275000	0	0	0	0	0	0	0	0	0	0	0
SETESRGSESGIFTNTKESSSHHPGIAEFPSRG	701.927	0.15	60	7.6	5.44	sp|P02671|FIBA_HUMAN		54000	37300	180000	18700	112000	266000	4520	114000	65500	26500	17300	30700	10300	284000	6620	149000	25000	0	0	0	0	0	0	0	0	0	0	0
ADSGEGDFLAEGGGV	690.798	0.25	60	2.9	3.43	sp|P02671|FIBA_HUMAN		128000	34100	70300	59300	121000	134000	65600	116000	129000	68700	42400	66800	79300	91800	94700	133000	38400	0	0	0	0	0	0	0	0	0	0	0
SSSYSKQFTSSTSYNRGDSTFESKSYKMADEAGSEADHEGTHST	957.811	0.15	60	7.7	5.01	sp|P02671|FIBA_HUMAN		156000	81200	146000	61300	121000	195000	33100	98600	149000	3800	45700	43200	40500	118000	5280	228000	58600	0	0	0	0	0	0	0	0	0	0	0
ELKGRARGKPSLLAAARPMRAILPAPVNVGR	817.251	0.22	60	5.7	12.18	sp|Q12766|HMGX3_HUMAN		106000	118000	104000	118000	0	36300	54300	178000	97100	44300	139000	85100	158000	286000	195000	204000	71600	0	0	0	0	0	0	0	0	0	0	0
RQCISGN(+.98)CDDMDSPQ	557.196	0.21	60	9.8	3.93	sp|Q8NET8|TRPV3_HUMAN	Deamidation (NQ)	241000	37100	12800	281000	0	0	251000	282000	81700	113000	114000	103000	104000	357000	141000	75700	0	0	0	0	0	0	0	0	0	0	0	0
ENRGGDPHSEAPFAKSDN(+.98)QPSTEKAME	977.436	0.64	60	6.1	4.64	sp|Q8WXH0|SYNE2_HUMAN	Deamidation (NQ)	351000	59600	4350	618000	0	0	499000	0	0	30100	23000	305000	27700	59300	254000	50000	82800	0	0	0	0	0	0	0	0	0	0	0
Q(-17.03)GVNDNEEGF	546.216	0.23	60	1.5	3.57	sp|P02675|FIBB_HUMAN	Pyro-glu from Q	10900	19600	449000	0	829000	467000	0	27400	30200	4200	0	7200	0	151000	0	267000	146000	0	0	0	0	0	0	0	0	0	0	0
DFLAEGGGV	864.408	0.27	60	5.5	3.67	sp|P02671|FIBA_HUMAN		455000	97900	42400	181000	54000	89600	147000	16200	21600	153000	57900	161000	112000	382000	183000	237000	218000	0	0	0	0	0	0	0	0	0	0	0
GEGDFLAEGGGV	554.25	0.3	60	2.6	3.57	sp|P02671|FIBA_HUMAN		453000	90700	55500	138000	45300	75900	193000	38300	62800	239000	57400	248000	167000	260000	219000	199000	99700	0	0	0	0	0	0	0	0	0	0	0
Q(-17.03)GVNDNEEGFF	1238.49	0.18	60	5.5	3.57	sp|P02675|FIBB_HUMAN	Pyro-glu from Q	290000	31500	180000	116000	289000	92200	183000	120000	180000	100000	118000	273000	173000	277000	220000	655000	217000	0	0	0	0	0	0	0	0	0	0	0
SGEGDFLAEGGGV	597.766	0.49	60	2.8	3.57	sp|P02671|FIBA_HUMAN		784000	78200	111000	259000	90200	136000	230000	64000	80200	318000	137000	536000	198000	423000	364000	241000	72400	0	0	0	0	0	0	0	0	0	0	0
E(-18.01)EFCCEECM(+15.99)SKYT	533.851	0.54	60	5.6	4.09		Pyro-glu from E; Oxidation (M)	582000	300000	301000	308000	0	0	279000	0	433000	259000	431000	300000	350000	0	357000	181000	140000	0	0	0	0	0	0	0	0	0	0	0
S(+42.01)ETSRTAFGGRRAVPPNNSNAAEDDLPTVELQGVVPR	988.247	0.32	60	4.2	4.93		Acetylation (Protein N-term)	528000	164000	368000	563000	235000	14100	760000	249000	540000	265000	419000	322000	238000	286000	910000	32400	218000	0	0	0	0	0	0	0	0	0	0	0
SSSYSKQFTSSTSYNRGDSTFESKSY	733.576	0.29	60	6.3	8.1	sp|P02671|FIBA_HUMAN		1920000	247000	118000	926000	240000	124000	741000	106000	329000	520000	184000	629000	519000	493000	327000	1000000	648000	0	0	0	0	0	0	0	0	0	0	0
DSGEGDFLAEGGGV	655.279	0.18	60	4.8	3.43	sp|P02671|FIBA_HUMAN		1740000	837000	239000	1020000	155000	220000	892000	274000	236000	371000	446000	550000	379000	501000	884000	298000	149000	0	0	0	0	0	0	0	0	0	0	0
TLDPERLG	450.746	0.03	60	14.5	4.37	sp|P01024|CO3_HUMAN		0	0	0	0	0	0	0	0	0	0	0	0	0	0	0	0	0	0	0	0	0	0	11.1	0	0	0	0	0
RPGVK	556.36	0.01	60	9.9	11			0	0	0	795	0	0	0	0	0	957	0	0	0	163	0	0	0	0	0	0	0	0	0	21.3	0	0	0	0
KSKVR	617.417	0.02	60	9.5	11.17			0	2370	0	0	235	194	0	69.7	84.2	0	2060	0	45	594	0	87.7	180	0	0	0	0	0	0	47.1	0	0	0	0
QGCGD	479.16	0.01	60	12.5	3.8			0	0	0	0	0	0	0	0	0	0	0	0	0	0	0	0	0	0	0	56.2	0	0	0	0	0	0	0	0
AVTSCQ	608.271	0.01	60	7.9	5.56			0	0	120	0	0	0	0	0	0	0	0	6340	0	0	0	0	0	0	0	0	0	0	0	0	59.5	0	0	0
DSKGR	562.298	0.01	5.3	9.8	8.75			0	0	0	0	0	5960	0	0	1780	2150	0	0	0	0	0	0	0	0	0	0	0	0	81.9	0	0	0	0	0
DKGAN	504.237	0.06	60	6.3	5.84			0	2150	0	0	375	393	0	0	0	0	1110	0	0	2680	0	0	0	0	0	0	0	0	0	83.2	0	0	0	0
VGLIPAGA	697.429	0.47	29.23	4.8	5.49			0	4450	29500	7250	27000	44600	9010	14100	11000	9300	12600	15300	10100	13000	10700	19300	18300	0	0	0	0	0	0	0	0	0	100	0
PPPVR	565.36	0.03	5.54	9.2	10.18			0	0	0	0	0	0	0	0	0	0	0	0	9320	0	0	0	0	37.1	0	0	0	0	0	0	64.8	0	0	0
APPVAPERQPSWDPSPVS	639.658	0.01	60	18.9	4.37			0	0	0	0	0	0	0	0	0	0	0	0	0	0	0	0	8900	0	0	0	0	0	0	0	0	0	0	102
FKTSAAL	369.218	0.01	19.63	0	8.75			0	0	0	0	0	0	0	0	0	0	0	0	0	0	0	0	0	107	0	0	0	0	0	0	0	0	0	0
CMSMGCVSGCLCPPGM(+15.99)	531.184	0.01	19.93	0	5.5		Oxidation (M)	0	0	0	0	0	0	0	0	0	0	0	0	0	0	0	0	0	0	0	110	0	0	0	0	0	0	0	0
CREGDIEK	949.447	0.02	60	11.8	4.68			0	0	0	0	0	0	0	0	0	0	0	0	0	0	0	0	0	0	0	0	0	0	0	0	0	0	116	0
KTAVLR	687.443	0.03	5.42	8.2	11			0	1030	0	0	0	0	0	6830	5990	0	0	0	904	0	0	0	0	0	0	0	0	0	0	0	0	104	14.1	0
AEKLAKERQEAEEAKEALLQ	571.81	0.05	60	10.3	4.77			0	0	0	0	0	0	0	0	1150	0	0	1400	0	0	0	0	0	0	0	122	0	0	0	0	0	0	0	0
GREGGSH	350.159	0.01	25.85	0	6.75			0	0	0	0	0	0	0	0	0	0	0	0	0	0	0	0	0	0	0	0	0	0	0	0	0	0	0	129
LAGSGT	505.257	0.01	60	9.8	5.52			0	0	0	0	0	0	0	0	0	0	0	0	0	0	0	0	0	0	0	0	0	0	0	0	0	0	0	132
KDLHVRGRRHRLQYRKKVN(+.98)PDLPI	999.265	0.13	6.92	8.8	11.47		Deamidation (NQ)	0	2000	0	5940	9010	777	0	5370	928	4090	0	918	0	2850	0	20100	0	0	0	0	0	137	0	0	0	0	0	0
KEATLELILK	579.362	0.23	60	5.9	6.14			7940	0	9100	0	5680	9820	6340	7300	8140	7320	0	9440	8910	0	5480	0	7350	0	0	0	0	0	0	0	0	0	0	141
PPPKK	566.38	0.12	6.71	8.5	10.02	sp|P21817|RYR1_HUMAN		291	0	0	6350	0	0	8510	9310	7890	0	0	0	0	8820	0	1380	0	0	0	0	0	0	0	147	0	0	0	0
GGSTSYGTGSETESPRN(+.98)PSSAGSWNSGSSGPGSTGN	1121.48	0.01	60	2.5	4.53	sp|P02671|FIBA_HUMAN	Deamidation (NQ)	0	0	0	0	0	0	0	0	0	0	0	0	0	0	0	0	0	0	0	0	0	0	0	0	0	173	0	0
HVPLALCVLR	1120.69	0.02	4.53	11.9	8.26			0	0	0	0	0	0	1870	78.6	0	0	0	194	0	0	0	1220	0	160	1.19	0	0	0	0	0	0	20.4	0	0
GHALRKKVQF	1183.73	0.02	5.12	7.1	11.17			350	285	213	0	0	68.5	0	501	0	0	0	0	0	2710	72.8	0	0	0	195	0	0	0	0	0	0	0	0	0
DGADENDCQYPTCEQLTCDN(+.98)GACYN(+.98)T	949.013	0.07	5.89	8.1	3.25		Deamidation (NQ)	2990	0	0	3130	0	0	2500	0	0	1050	0	3250	2580	2690	0	1770	0	198	0	0	0	0	0	0	0	0	0	0
KKESKKKTLKN	666.42	0.07	60	7.1	10.3			1270	1520	975	706	804	627	0	1160	1240	380	1290	1040	731	0	1050	1420	1570	0	0	0	0	0	0	0	0	0	199	0
HGYHG	570.24	0.01	57.01	0	6.92			0	0	0	0	0	0	0	0	0	0	0	0	0	0	0	0	0	0	0	0	0	0	203	0	0	0	0	0
QLASERLKRATRKGTVLQPVLRRKN	973.591	0.08	6.14	8.5	12.18			1350	4910	0	1370	0	2010	0	9930	2630	440	968	5650	3760	509	0	0	6890	0	0	0	0	0	0	0	0	206	0	0
VIGAVVAAVM(+15.99)	473.285	0.01	60	0	5.49		Oxidation (M)	0	0	0	0	0	0	0	0	0	0	0	0	0	0	0	0	0	0	0	0	0	0	0	0	0	211	0	0
GDSTFESKSYKMADEAG	608.253	0.02	5.25	7.6	4.32	sp|P02671|FIBA_HUMAN		3690	0	0	959	1840	0	0	0	0	0	0	0	0	0	862	0	1510	211	0	0	0	0	0	0	0	0	0	0
EVLSPTVKGKL	1170.71	0.02	60	7.9	8.69			903	181	0	0	0	103	0	472	268	0	0	0	661	303	231	0	0	0	0	0	0	0	0	0	0	213	0	0
IRGLPGIKGPPGALGLRGPKGDLG	1148.69	0.01	60	10.1	11			274	0	0	0	0	0	0	0	0	0	0	546	117	1170	587	0	0	0	217	0	0	0	0	0	0	0	0	0
DDPDAPLQPVTPLQLF	883.451	0.03	5.58	4.7	3.42			0	0	15200	1010	11500	1370	0	706	824	0	0	0	0	0	0	0	0	223	0	0	0	0	0	0	0	0	0	0
APSSN	475.213	0.02	60	6.3	5.57			0	0	0	0	0	0	0	0	0	0	0	0	0	0	0	0	0	0	0	0	0	0	218	0	0	0	13	0
CCHCK	593.188	0.01	60	0	7.97			0	0	0	0	0	0	0	0	0	0	0	0	0	0	0	0	0	0	0	0	0	250	0	0	0	0	0	0
IRLDIQGTGQ(+.98)LLFSVVINQLR	795.469	0.01	60	0	9.6		Deamidation (NQ)	0	0	0	0	0	0	0	0	0	0	0	0	0	0	0	0	0	0	0	0	0	0	0	0	0	0	266	0
QLLPGAKLG	896.553	0.01	60	11.7	8.75			0	569	388	0	0	98.8	0	1080	0	0	144	0	0	59.9	399	0	0	21	0	0	0	0	0	0	0	0	256	0
TSLGSWHGVEGEGAHP	405.947	0.04	60	2.9	5.21			5290	0	0	16.9	0	0	0	0	7.14	0	0	0	0	0	0	82.6	0	0	0	0	0	0	0	0	0	277	0	0
VRILINDAYKRTVALLTEKKADVEK	722.437	0.03	60	11.1	9.4			0	0	0	0	0	0	0	0	0	0	0	0	0	0	0	0	0	0	0	0	0	0	302	0	0	0	0	0
SSTLSLT	708.389	0.01	60	19.1	5.24			0	0	0	0	0	0	0	0	0	0	0	0	0	0	0	0	0	0	0	307	0	0	0	0	0	0	0	0
GPSGNH	568.249	0.06	5.5	6.6	6.74			0	0	0	0	0	0	0	1920	2020	0	0	0	0	3010	0	0	0	0	0	0	0	0	0	0	0	0	308	0
VFVLHTFLSAKVTR	539.984	0.05	60	2.3	11			0	0	0	0	0	0	0	0	0	0	0	0	0	0	0	0	0	0	0	0	309	0	0	0	0	0	0	0
PLPSKETIEQEKQAGES	624.311	0.01	60	2.8	4.49	sp|P62328|TYB4_HUMAN		0	0	0	0	1170	0	0	0	0	0	0	0	0	0	0	0	0	0	0	0	0	309	0	0	0	0	0	0
PPLLL	552.366	0.02	60	9.3	5.96			0	0	0	0	0	14.6	0	0	8.71	71.9	0	0	0	0	1210	0	82.1	0	41.4	58.4	93.6	29.5	39.1	27	21.5	0	0	0
TSLVKFV	793.509	0.21	8.6	6.5	8.41			0	1180	4850	0	5490	9120	0	3130	2220	2050	2220	3900	2810	3880	0	5130	4290	0	0	0	0	0	0	317	0	0	0	0
EAFCP	566.226	0.01	60	5.3	4			0	0	0	0	0	0	0	0	0	0	121	0	0	0	0	0	0	0	0	0	0	322	0	0	0	0	0	0
ATTRGSAKQ	460.252	0.02	60	4.1	11			1400	0	0	0	0	0	0	0	0	0	0	0	0	0	0	0	0	0	0	0	0	328	0	0	0	0	0	0
PALPIFSMTLGAVSNLLALALLAQAAGRLRRRR	1173.04	0.04	5.53	11	12.6			0	9700	1060	6010	0	0	2000	73.6	5970	1650	0	2830	4160	7540	2710	1500	0	331	0	0	0	0	0	0	0	0	0	0
HPVLLALRNT	1133.69	0.08	5.95	7.7	9.76			418	56.7	1080	0	0	627	95.2	411	1400	201	812	0	1690	1400	101	39.5	67.3	0	0	0	0	48	0	0	0	286	0	0
FEVCRSM	436.19	0.01	60	0	5.99			0	0	0	0	0	0	0	0	0	0	0	0	0	0	0	0	0	0	0	0	0	0	0	0	0	0	0	338
PAVEGE	601.285	0.01	5.36	7	3.8			0	0	1540	0	0	0	0	0	0	0	0	0	0	0	0	0	0	0	0	0	0	0	0	0	0	341	0	0
LSTKGQ(+.98)KKG	947.555	0.01	60	12.9	10.3		Deamidation (NQ)	0	0	0	0	0	0	0	0	0	0	0	5910	0	0	0	0	0	0	0	0	0	0	344	0	0	0	0	0
GSHGRNSPGL	491.254	0.01	60	0	9.76			0	0	0	0	0	0	0	0	0	0	0	0	0	0	0	0	0	0	0	0	0	345	0	0	0	0	0	0
QPAPC	515.225	0.02	60	1.1	5.52			0	0	0	0	0	0	0	0	0	0	0	0	0	0	0	0	0	0	0	0	0	0	0	0	0	0	346	0
QSSGHGRQGSGSGHSP	508.23	0.04	60	3.5	9.76			0	0	469	0	587	0	0	0	0	0	0	0	0	0	0	0	0	0	0	0	0	347	0	0	0	0	0	0
LGAGIPGLGVGV	1009.62	0.03	4.86	9.5	5.52			0	195	259	47.4	0	251	422	0	0	0	0	249	124	1490	318	215	0	0	0	0	104	0	0	0	0	170	74.1	0
GRPKK	585.381	0.08	6.14	3.7	11.17			0	0	3860	0	0	6240	0	9270	0	0	0	0	0	0	0	6680	5870	0	0	0	0	0	0	0	0	0	356	0
GAATT	420.22	0.08	5.99	3.9	5.52			0	0	0	0	0	0	0	2040	1650	0	0	0	0	0	0	0	1690	0	0	0	0	200	0	0	0	0	158	0
TAKN(+.98)TKLDDLFLK	503.286	0.01	60	2.7	8.17		Deamidation (NQ)	0	0	0	0	0	0	0	0	0	0	0	0	0	0	0	0	0	0	0	0	0	0	0	0	359	0	0	0
GSGAPAGSGGK	423.21	0.01	60	10.8	8.75			0	0	0	0	0	0	0	0	0	0	0	0	650	0	0	0	0	0	0	0	0	380	0	0	0	0	0	0
E(-18.01)QASSGSQIPFDPYATDS	941.409	0.01	5.26	4.7	3.49		Pyro-glu from E	0	0	0	0	0	0	0	3250	1510	0	0	0	0	2590	0	0	0	0	0	0	0	0	384	0	0	0	0	0
AAPLRPT	725.421	0.03	60	5.5	9.79			0	0	0	0	0	5320	0	0	3510	0	0	0	0	0	0	0	0	394	0	0	0	0	0	0	0	0	0	0
KFVVK	620.406	0.04	60	3.5	10			0	0	0	0	0	0	0	0	0	0	1190	0	0	548	1080	0	0	38.6	0	0	76.4	80.6	0	52	66.4	0	45.3	35.2
EDGYP	580.216	0.01	60	0	3.67			0	0	0	0	0	0	0	0	0	0	0	0	0	0	0	0	0	0	404	0	0	0	0	0	0	0	0	0
DTVCL	550.253	0.01	60	7.2	3.8	sp|P98194|AT2C1_HUMAN		0	0	0	0	0	0	0	0	4050	0	0	1910	0	0	0	0	0	0	0	0	0	0	0	0	0	0	404	0
GIRIRSGNILIHAAVM(+15.99)T	613.369	0.02	60	13.5	12		Oxidation (M)	0	0	0	0	0	0	0	0	0	0	0	0	0	0	0	0	0	0	0	0	0	0	0	0	0	0	164	241
FAANC	525.204	0.01	60	0	5.52			0	0	0	0	0	0	0	0	0	0	0	0	0	0	0	0	0	0	0	0	0	0	0	0	0	0	408	0
SKQVKAPSS	931.528	0.01	60	9.4	10			0	0	0	0	0	0	0	0	0	0	0	0	0	0	0	0	0	20.3	94.3	0	0	0	0	0	0	296	0	0
V(+42.01)PPAT	526.283	0.04	60	8.4	5.49		Acetylation (Protein N-term)	0	0	0	0	0	0	1630	0	0	1040	0	0	0	0	0	0	0	0	0	158	0	0	255	0	0	0	0	0
HVQPQPQPKPQVQL	541.971	0.02	60	0.5	8.76	sp|Q15942|ZYX_HUMAN		0	0	0	0	0	0	0	0	0	0	0	758	0	0	0	0	0	0	0	0	0	0	0	0	0	0	415	0
KKAQQ	602.348	0.27	9.73	5.4	10			0	15800	6650	16500	9040	4140	22900	25500	34900	12700	23500	22300	19500	29100	0	23900	21600	0	0	0	421	0	0	0	0	0	0	0
PGMNPGPPMGP	526.242	0.01	60	0.5	5.96			0	0	0	0	0	0	0	0	0	0	0	0	0	0	0	0	0	0	0	285	0	0	0	0	0	143	0	0
SEGPTGPQ(+.98)GL	472.214	0.01	60	0	4		Deamidation (NQ)	0	0	0	0	0	0	0	0	0	0	0	0	0	0	0	0	0	0	0	437	0	0	0	0	0	0	0	0
VKVVGT	602.403	0.01	60	11	8.72			0	0	566	0	0	0	0	0	0	0	0	0	3200	195	0	620	0	0	0	377	0	0	0	0	63.4	0	0	0
GSSDN	479.166	0.02	60	7.1	3.8			0	0	0	0	0	0	0	0	0	0	0	0	0	0	0	0	0	0	0	113	0	0	329	0	0	0	0	0
Q(+.98)PNNLGTNSLNKQHN	420.706	0.01	60	0	8.76		Deamidation (NQ)	0	0	0	0	0	0	0	0	0	0	0	0	0	0	0	0	0	0	0	0	0	0	0	0	0	0	450	0
AILDIAGLAA	927.569	0.01	60	0	3.8			0	0	0	0	0	0	0	0	0	0	0	0	0	0	0	0	0	0	0	0	0	0	0	0	0	0	0	457
YGFQVKVLR	1109.66	0.03	5.47	10.1	9.99			286	0	91	108	517	444	0	0	184	0	0	177	0	317	0	0	0	164	0	0	0	134	0	0	0	163	0	0
LSRPIQ(+.98)SPG	478.256	0.02	60	6.2	9.75		Deamidation (NQ)	0	0	0	0	0	0	0	0	0	0	0	0	0	0	0	0	0	0	0	0	0	0	0	0	0	0	463	0
RLGGVSGILQV	1098.68	0.03	2.79	10.4	9.75			0	165	0	0	0	20.2	84	241	55.6	0	75.7	41.1	183	120	0	0	0	178	0	0	0	0	0	0	0	285	0	0
GKPHG	495.272	0.01	60	0	8.76			0	0	0	0	0	0	0	0	0	0	0	0	0	0	0	0	0	0	0	0	0	0	0	0	0	0	0	477
HCCACGAVM	894.299	0.01	4.4	7.4	6.71			1070	0	0	0	0	0	0	0	0	0	0	0	637	0	0	0	0	0	0	0	0	0	0	0	0	480	0	0
CPCASGLTCVELADAEVGLHVG	536.753	0.03	60	8.3	4.13			0	0	1990	0	0	3930	0	0	0	0	0	0	0	0	0	0	0	0	0	0	0	0	0	0	0	0	0	487
GHGLGHGHEQQHGLGHGHKF	426.209	0.03	60	3.6	7.21			0	0	0	0	0	0	0	0	0	0	0	0	0	0	0	933	0	490	0	0	0	0	0	0	0	0	0	0
EEVSGNVSPGTRREYHTEKLVTSKGDKEL	649.933	0.04	60	5.6	5.65	sp|P02671|FIBA_HUMAN		0	0	0	0	5000	0	0	0	0	0	0	0	1500	0	0	11100	983	0	0	0	0	0	0	0	0	0	0	494
QQQQLR	400.727	0.01	60	0	9.75			0	0	0	0	0	0	0	0	0	0	0	0	0	0	0	0	0	0	0	0	498	0	0	0	0	0	0	0
KSGVT	491.266	0.02	60	17.3	8.75			0	0	0	0	0	0	0	0	0	0	0	0	0	0	388	0	0	0	0	0	0	0	0	0	0	0	498	0
KTFIAVLLT	1005.63	0.01	1.48	11	8.75			0	0	0	0	0	268	95.8	335	0	0	0	0	0	0	0	138	0	500	0	0	0	0	0	0	0	0	0	0
KGATGPPGING	484.764	0.01	60	0	8.75			0	0	0	0	0	0	0	0	0	0	0	0	0	0	0	0	0	508	0	0	0	0	0	0	0	0	0	0
KESQNTAEIISPPSPD	571.612	0.04	3.79	7.7	4.14			0	293	695	0	0	0	0	0	0	313	334	962	0	0	0	0	0	0	0	0	0	0	0	0	0	509	0	0
RPRPRLYGIV	409.587	0.01	60	0	11.71			0	0	0	0	0	0	0	0	0	0	0	0	0	0	0	0	0	0	0	0	517	0	0	0	0	0	0	0
LHNACSF	396.17	0.01	60	0	6.73			0	0	0	0	0	0	0	0	0	0	0	0	0	0	0	0	0	0	530	0	0	0	0	0	0	0	0	0
ESSAAQAGSHATHPG	469.87	0.01	60	0	5.99			0	0	0	0	0	0	0	0	0	0	0	0	0	0	0	0	0	0	0	0	0	0	0	534	0	0	0	0
GHSAV	470.229	0.01	60	0	6.74			0	0	0	0	0	0	0	0	0	0	0	0	0	0	0	0	0	544	0	0	0	0	0	0	0	0	0	0
KKKTK	632.452	0.49	35.88	4.3	10.48			13600	14700	14100	4370	13200	18200	5060	9290	6560	11300	22400	13900	4590	5360	12300	12900	12700	0	0	0	0	0	0	0	0	554	0	0
HPAAK	523.308	0.01	60	11.2	8.76			0	0	0	0	0	0	0	0	0	0	0	0	0	0	0	0	0	0	562	0	0	0	0	0	0	0	0	0
MADEAGSEADHEGTHSTKR	507.975	0.01	60	15.4	4.86	sp|P02671|FIBA_HUMAN		0	0	0	0	0	0	0	0	0	0	0	0	0	0	0	0	0	0	0	0	0	0	0	0	0	0	0	563
Q(+.98)IRSSVIIIQ(+.98)ARSKGF	452.013	0.01	60	0	12.01		Deamidation (NQ)	0	0	0	0	0	0	0	0	0	0	0	0	0	0	0	0	0	0	0	0	0	0	0	0	0	0	564	0
S(+42.01)DKPDM(+15.99)AEIEKFDKSKLKKTET	526.07	0.22	8.71	3.3	6.03	sp|P62328|TYB4_HUMAN	Acetylation (Protein N-term); Oxidation (M)	0	0	18400	0	27900	17400	0	0	0	0	642	0	0	8570	0	14700	20600	0	0	0	0	0	0	0	0	567	0	0
LGFAGTFLG	441.739	0.01	60	0	5.52			0	0	0	0	0	0	0	0	0	0	0	0	0	0	0	0	0	0	0	0	0	0	0	0	0	0	0	577
PRGLGSFEYQDTT	490.904	0.03	60	2.9	4.37			0	0	0	0	0	0	0	0	0	0	0	491	0	0	0	0	0	0	185	392	0	0	0	0	0	0	0	0
PHQ(+.98)APLGD	418.201	0.01	60	6.4	5.08		Deamidation (NQ)	0	0	0	0	0	0	0	0	0	0	0	0	0	0	0	0	0	0	0	580	0	0	0	0	0	0	0	0
KNRLPRSV	969.596	0.04	60	10.4	12.01			280	230	0	0	0	0	0	620	155	0	64.3	632	0	0	1450	0	85.1	190	0	0	0	0	244	90.6	0	44.9	15.6	0
SPPGKPQGPP	481.259	0.01	60	7.2	8.47			0	0	0	0	0	0	0	0	0	0	0	0	0	0	0	0	0	0	0	0	0	0	0	0	0	0	593	0
PEQ(+.98)EAECPED	574.205	0.01	60	0	3.45		Deamidation (NQ)	0	0	0	0	0	0	0	0	0	0	0	0	0	0	0	0	0	0	0	0	0	0	0	594	0	0	0	0
NPLSVV	628.364	0.2	8.02	2.9	5.52	sp|O60494|CUBN_HUMAN		0	24400	9660	40700	0	0	0	0	0	0	0	0	1410	3590	1810	8610	1910	0	0	0	0	171	41.8	0	386	0	0	0
STSYNRGDSTFESKSYKMA	540.498	0.01	60	8.2	8.16	sp|P02671|FIBA_HUMAN		0	0	0	0	0	0	0	0	0	0	937	1170	0	0	886	0	0	0	0	0	0	0	0	0	0	0	606	0
ATTM(+15.99)HFPSEAFSLSW	576.591	0.33	11.46	3.3	5.24	sp|Q9ULL8|SHRM4_HUMAN	Oxidation (M)	0	0	9570	0	3720	8060	0	3010	2460	2180	0	0	4920	3380	1560	5400	0	0	0	608	0	0	0	0	0	0	0	0
NM(+15.99)GM(+15.99)GT	642.211	0.05	60	4.5	5.52	sp|Q09472|EP300_HUMAN	Oxidation (M)	6490	0	0	0	0	0	0	0	0	0	0	0	0	0	0	0	0	0	0	0	0	0	0	0	0	0	0	617
HRHPDEAAFFDTASTGKTFPG	573.02	0.01	5.35	9	6	sp|P02671|FIBA_HUMAN		0	1120	6710	0	21300	0	0	10800	4630	1720	0	0	2650	0	0	4750	7880	0	632	0	0	0	0	0	0	0	0	0
SLILSLKM(+15.99)SSLGKIQ	817.497	0.01	60	10.1	10		Oxidation (M)	0	37.1	66.6	0	14800	532	0	0	1540	0	0	2640	0	37800	0	62800	0	0	137	0	153	0	0	0	0	60.2	285	0
E(-18.01)ALIHPTGLSTGALVAILLCIVILLVTVVLFAALRRQRKK	859.119	0.01	60	5.6	10.92		Pyro-glu from E	974	1370	0	0	0	2300	0	0	0	0	2420	0	0	0	1250	2650	0	0	0	0	642	0	0	0	0	0	0	0
AGLPGA	485.276	0.01	60	14.2	5.57			0	0	1610	0	0	0	0	0	0	0	0	0	0	0	0	0	0	643	0	0	0	0	0	0	0	0	0	0
QKDPLV	350.204	0.01	60	0	5.84			0	0	0	0	0	0	0	0	0	0	0	0	0	0	0	0	0	0	0	653	0	0	0	0	0	0	0	0
EELKARISASAEELRQ	610.657	0.02	60	1.8	4.95			0	0	0	0	0	0	0	0	0	0	0	0	0	0	0	0	0	0	0	0	654	0	0	0	0	0	0	0
GAVVTGVTAVAQKTVE	765.424	0.02	5.25	4.1	6			0	0	4910	0	0	0	0	0	0	671	0	2510	1770	0	2450	3330	0	662	0	0	0	0	0	0	0	0	0	0
LDIQGTGQLLFSVVINQLR	705.397	0.03	60	8	5.84			0	0	0	0	0	0	0	0	0	0	0	0	0	0	0	0	0	13.9	161	0	0	0	0	0	0	0	101	387
LGGTMILVIGGIIVATLLVFIVILM(+15.99)V	895.548	0.04	5.38	9.3	5.52		Oxidation (M)	0	7950	1180	0	2730	0	10500	0	0	5920	0	5590	0	0	0	1930	4110	0	0	0	663	0	0	0	0	0	0	0
RGLSAASPPL	968.593	0.02	4.23	9	9.75			0	0	0	0	0	0	0	0	1040	0	0	0	0	201	0	0	0	0	111	0	0	416	0	0	0	0	141	0
SVVGSGTTRPLAGESGTTESSAGVTGT	617.301	0.01	60	6	4.53			0	0	0	0	0	0	0	0	0	0	0	0	0	0	0	0	0	674	0	0	0	0	0	0	0	0	0	0
YAAKA	523.293	0.01	60	0	8.59			0	0	0	0	0	0	0	0	0	0	0	0	0	0	0	0	0	0	678	0	0	0	0	0	0	0	0	0
SYKMADEAGSEADHEGTHSTKR	482.219	0.13	60	3.4	5.37	sp|P02671|FIBA_HUMAN		0	0	0	0	14700	13900	0	0	0	0	0	0	0	5320	0	0	14300	680	0	0	0	0	0	0	0	0	0	0
SYNRGDSTFESKSYKMADEAGSEADHEGTHST	699.697	0.09	6.15	3.6	4.69	sp|P02671|FIBA_HUMAN		0	0	11200	0	3820	40200	0	10100	5210	0	2060	0	1790	11200	0	27900	0	680	0	0	0	0	0	0	0	0	0	0
KTKRVSARTNKARA	793.986	0.04	5.8	6.2	12.31			742	0	0	1410	6050	0	0	2420	2480	7450	4160	3650	0	2840	0	0	14400	0	0	0	0	0	0	272	346	0	66.2	0
LIILL	584.437	0.01	60	0	5.52			0	0	0	0	0	0	0	0	0	0	0	0	0	0	0	0	0	0	0	0	0	0	0	0	0	0	688	0
LGLLPALGW	939.576	0.04	3.83	11	5.52			0	0	0	300	443	588	400	451	0	206	0	0	0	277	102	0	0	0	233	0	0	0	108	0	222	127	0	0
TQLKGIKG	844.524	0.01	60	8.7	10			0	0	0	0	0	197	594	81.5	0	208	0	0	124	0	0	0	0	0	0	0	0	0	413	0	0	0	279	0
EELGGLASQMT	568.264	0.01	60	0	3.8			0	0	0	0	0	0	0	0	0	0	0	0	0	0	0	0	0	0	0	0	0	0	0	696	0	0	0	0
TKEPGRTLEPQ	419.221	0.04	60	1.5	5.81			0	0	1630	0	0	817	0	0	0	2230	0	0	0	0	0	0	0	0	0	0	0	0	0	0	0	697	0	0
ISGHN(+.98)IVQPT	533.78	0.02	60	0.5	6.74		Deamidation (NQ)	0	0	0	0	0	69.5	0	0	0	0	0	0	0	0	0	0	0	0	0	0	0	0	0	698	0	0	0	0
NNN(+.98)SQQDIDS	568.225	0.02	60	3.5	3.56		Deamidation (NQ)	0	0	0	0	0	0	0	0	0	0	0	0	0	0	0	0	0	324	381	0	0	0	0	0	0	0	0	0
VFPAVQGKTK	1074.65	0.01	60	9.1	10			367	0	0	4000	540	0	93.7	456	0	0	0	0	0	0	0	0	0	0	0	0	0	359	0	0	0	346	0	0
PPGVLV	581.368	0.01	60	0	5.96			0	0	0	0	0	0	0	0	0	0	0	0	0	0	0	0	0	716	0	0	0	0	0	0	0	0	0	0
EAVSTQ(+.98)M(+15.99)EKWYERK	601.288	0.02	5.13	12.7	6.33		Deamidation (NQ); Oxidation (M)	0	0	0	0	0	3590	0	3700	0	0	3200	400	0	0	2480	6030	132	0	0	0	0	0	720	0	0	0	0	0
VILSFLFLL	1064.66	0.02	5.26	8.6	5.49			0	0	0	0	0	1010	3240	0	0	0	0	0	2120	1670	161	0	0	38	0	0	0	632	0	0	0	52.4	0	0
IGHVI	538.343	0.01	60	0	6.74			0	0	0	0	0	0	0	0	0	0	0	0	0	0	0	0	0	0	0	0	0	0	0	0	0	0	724	0
N(+.98)GKVNDDVGIDWTN	516.577	0.01	60	0	3.93		Deamidation (NQ)	0	0	0	0	0	0	0	0	0	0	0	0	0	0	0	0	0	0	0	0	0	0	0	0	0	728	0	0
GDSTFESKSYKMADEAGSEADHEGTHSTK	621.266	0.02	60	11.8	4.69	sp|P02671|FIBA_HUMAN		0	0	0	0	0	0	0	0	0	0	0	0	0	0	0	0	0	0	369	361	0	0	0	0	0	0	0	0
T(+42.01)DYSTYSQ(+.98)AAAQQGYSAYTAQ(+.98)PTQG	901.379	0.15	6.98	8.4	3.8	sp|Q01844|EWS_HUMAN	Acetylation (Protein N-term); Deamidation (NQ)	9420	10400	0	3820	7260	0	4270	4600	9060	3530	4580	7880	3710	0	2710	0	9090	0	0	0	0	0	0	0	0	0	0	734
QQ(+.98)HMLSGQ(+.98)PQASHLPGQQ	658.636	0.01	60	9.7	6.92		Deamidation (NQ)	0	0	0	4170	0	0	0	0	0	0	0	0	0	0	0	0	4810	0	0	0	0	0	0	0	0	0	736	0
IRLDIQGTGQLLFSVVINQLR	795.137	0.02	60	7.3	9.6			0	0	0	0	0	0	0	0	0	0	0	0	0	0	0	0	0	0	0	0	0	0	0	0	0	0	267	478
[truncated: 2,553 more rows]
